# Supplementary material for: Mid and hindgut transcriptome profiling analysis of Atlantic salmon (Salmon salar) under unpredictable chronic stress
Source: R Soc Open Sci. 2020 Feb 26;7(2):191480. doi: 10.1098/rsos.191480 (PMC7062075; doi:10.1098/rsos.191480)
Supplement: Analysis pipeline for R. [file rsos191480supp9.R]

# Analysis pipeline for publication "Mid and hindgut transcriptome profiling analysis of Atlantic salmon (Salmon salar) under unpredictable chronic stress".


## Section 1: QC, mapping and quantification
# ** NOTE: this section was completed using Linux tools via command-line

# 1. QC

mkdir qc
fastqc -o ./qc -t 65 *.fastq.gz

multiqc .

# 2. Indexing Atlantic salmon reference genome.
hisat2-build -p 45 GCF_000233375.1_ICSASG_v2_genomic.fna ICSASG_v2_hisat2_ref

# 3. Alignment against Atlantic salmon genome

gzip *.fastq.gz
for f1 in *.fastq
do
echo working with $f1
hisat2 -p 55 -x ICSASG_v2_hisat2_ref $f1 -S "${f1%%.fastq}.sam" --summary-file summary.txt
done

# 4. SAM -> BAM conversion and sorting

for f1 in *.sam
do
echo working with $f1
samtools view -@ 45 -bS $f1 > "${f1%%.sam}.bam"
samtools sort -@ 45 "${f1%%.sam}.bam" > "${f1%%.sam}.sorted.bam"
rm $f1
rm "${f1%%.sam}.bam"
done

# 5. Quantification

featureCounts -T 45 -t gene -g Dbxref -a GCF_000233375.1_ICSASG_v2_genomic.gff -o counts_genes.txt *.sorted.bam 


## Section 2
# **NOTE: the above was done using Linux tools, but from this point all analysis was done in R

# 1. Differential expression

library(DESeq2)

countdata <- read.table(counts_genes.txt, sep = "\t", header = T)
expdata <- as.matrix(countdata)
condition <- factor(c("group1", "group1", "group1", "group1", "group2", "group2", "group2"))
coldata <- data.frame(row.names=colnames(expdata), condition)
dds <- DESeq2::DESeqDataSetFromMatrix(countData=expdata, colData=coldata, design=~condition)
deseq <- DESeq(dds)
deseq$condition <- relevel(deseq$condition, ref="group1")
res <- results(deseq)
res <- res[order(res$padj), ]
b <- as.data.frame(subset(res, padj < 0.05, select=colnames(annot)))

# 2. Functional annotation

library(AnnotationHub)
library(ClusterProfiler)

hub <- AnnotationHub()
sal <- query(hub, "Salmo salar")[[1]]

c <- row.names(b)
kk <- enrichKEGG(gene = c, organism = 'sasa', pvalueCutoff = 0.05, qvalueCutoff = 0.05)
d <- as.character(c)
egoCC <- enrichGO(gene = d, OrgDb = sal, ont = "CC", pAdjustMethod = "BH", pvalueCutoff = p, qvalueCutoff = q, readable = TRUE)
egoBP <- enrichGO(gene = d, OrgDb = sal, ont = "BP", pAdjustMethod = "BH", pvalueCutoff = p, qvalueCutoff = q, readable = TRUE)
egoMF <- enrichGO(gene = d, OrgDb = sal, ont = "MF", pAdjustMethod = "BH", pvalueCutoff = p, qvalueCutoff = q, readable = TRUE)

pathfigfun <- function(group){
  j <- c()
  for (kegg in 1:length(kk@result[,1])){
    h <- strsplit(kk@result[kegg,8], "/")[[1]]
    n <- merge(x = as.data.frame(h), y = a, by.x = 1, by.y = "ENTREZID", all = F)
    i <- n$log2FoldChange
    names(i) <- h
    j <- c(j, i)
  }

pv.out <- pathview(gene.data  = j,
                    pathway.id = kk@result[,1],
                    species    = "sasa",
                    out.suffix = group,
                    limit      = list(gene=max(abs(i)), cpd=1))
