# Supplementary material for: Mid and hindgut transcriptome profiling analysis of Atlantic salmon (Salmon salar) under unpredictable chronic stress
Source: R Soc Open Sci. 2020 Feb 26;7(2):191480. doi: 10.1098/rsos.191480 (PMC7062075; doi:10.1098/rsos.191480)
Supplement: Supplementary table 3 [file rsos191480supp5.xlsx]

## Sheet: Ctrl_Hindgut_Vs_CS_Hindgut_DE_d
List of all expressed genes discovered in the hindgut, including the differential expression results - log fold change difference and adjusted p values - between CS and control groups. Genes are annotated with Entrez ID, gene symbol and gene description.
Gene	baseMean	log2FoldChange	lfcSE	pvalue	padj	ENTREZID	SYMBOL	Gene description
gene17472:106610526	302.654	-4.42574	0.380602	2.96039e-31	7.9889e-27	106610526	LOC106610526	von Willebrand factor A domain-containing protein 7-like
gene20156:106613145	482.195	-1.47516	0.171374	7.44532e-18	1.0046e-13	106613145	LOC106613145	von Willebrand factor A domain-containing protein 5A-like
gene13646:106606884	228.705	-1.6708	0.215354	8.60379e-15	7.7394e-11	106606884	LOC106606884	perforin-1-like
gene4660:106588084	463.11	-1.28869	0.175837	2.32076e-13	1.5657e-09	106588084	LOC106588084	integrin alpha-L-like
gene28648:106567542	273.302	-1.4111	0.210606	2.08171e-11	1.12354e-07	106567542	LOC106567542	vasodilator-stimulated phosphoprotein-like
gene57055:106591460	225.874	-2.07927	0.324527	1.48327e-10	6.67127e-07	106591460	LOC106591460	NACHT, LRR and PYD domains-containing protein 12-like
gene26133:106565117	121.517	-1.41106	0.226489	4.65963e-10	1.79636e-06	106565117	LOC106565117	differentially expressed in FDCP 6 homolog
gene35008:106573870	262.735	-1.31133	0.211942	6.12309e-10	2.06547e-06	106573870	jak3	Janus kinase 3
gene19898:106612811	719.938	-1.38938	0.225525	7.24426e-10	2.08803e-06	106612811	itgae	integrin subunit alpha E
gene9137:106602779	200.219	-1.2057	0.196439	8.36786e-10	2.08803e-06	106602779	LOC106602779	CD48 antigen-like
gene9572:106603043	60.4481	2.73535	0.445853	8.51119e-10	2.08803e-06	106603043	LOC106603043	ADP/ATP translocase 2-like
gene35028:106573888	233.959	-1.03995	0.172	1.4831e-09	3.33524e-06	106573888	LOC106573888	FYN-binding protein-like
gene7174:106600913	140.746	-1.24899	0.208087	1.94565e-09	4.03886e-06	106600913	LOC106600913	GEM-interacting protein-like
gene20650:106613637	137.778	-1.47237	0.250899	4.40108e-09	8.4834e-06	106613637	LOC106613637	interleukin-6 receptor subunit beta-like
gene40094:106578982	538.435	-1.02305	0.176876	7.29619e-09	1.15821e-05	106578982	LOC106578982	retinol-binding protein 4-B
gene4192:100196302	253.685	-1.25721	0.21723	7.14611e-09	1.15821e-05	100196302	ppt2a	Lysosomal thioesterase PPT2-A
gene9124:106602706	267.237	-1.13919	0.196279	6.47733e-09	1.15821e-05	106602706	LOC106602706	uncharacterized LOC106602706
gene21489:106560677	69.9416	-1.63026	0.282758	8.13731e-09	1.21996e-05	106560677	LOC106560677	capZ-interacting protein-like
gene40311:106579213	171.674	-1.11429	0.194383	9.89854e-09	1.40591e-05	106579213	nlrc3	NLR family CARD domain containing 3
gene14540:100194970	386.503	1.07631	0.188604	1.15154e-08	1.55378e-05	100194970	ctgf	connective tissue growth factor
gene43704:106582534	131.337	-1.59889	0.283581	1.71838e-08	2.2082e-05	106582534	LOC106582534	fer-1-like protein 6
gene13008:106606356	60.0654	-2.43258	0.434571	2.17257e-08	2.62786e-05	106606356	LOC106606356	nucleoside diphosphate-linked moiety X motif 19, mitochondrial-like
gene58411:106597977	141.529	-2.44103	0.436805	2.29218e-08	2.62786e-05	106597977	LOC106597977	mucin-2-like
gene75111:106591160	50.4178	-2.16215	0.387135	2.33709e-08	2.62786e-05	106591160	LOC106591160	uncharacterized LOC106591160
gene23195:106562362	236.146	-1.06799	0.192027	2.67169e-08	2.77301e-05	106562362	LOC106562362	tripartite motif-containing protein 66-like
gene32482:106571316	393.407	-1.86994	0.335863	2.58301e-08	2.77301e-05	106571316	LOC106571316	sodium-dependent glucose transporter 1-like
gene21978:106561150	262.832	-1.22123	0.220936	3.24791e-08	3.13029e-05	106561150	LOC106561150	nuclear receptor ROR-alpha
gene44663:106583480	256.696	-0.983483	0.17775	3.14877e-08	3.13029e-05	106583480	LOC106583480	differentially expressed in FDCP 6 homolog
gene4146:106582009	136.463	-1.06656	0.194958	4.48202e-08	4.17075e-05	106582009	LOC106582009	raftlin-like
gene46681:106585516	213.715	-1.13835	0.208986	5.12258e-08	4.60793e-05	106585516	LOC106585516	E3 ubiquitin-protein ligase DTX1-like
gene6156:106598932	2488.94	-0.693423	0.129577	8.72571e-08	7.59587e-05	106598932	LOC106598932	gelsolin-like
gene33776:106572591	154.646	-1.10119	0.206257	9.34932e-08	7.8844e-05	106572591	LOC106572591	arf-GAP with GTPase, ANK repeat and PH domain-containing protein 2-like
gene11745:106605103	69.5517	-1.83619	0.346324	1.14586e-07	9.37038e-05	106605103	LOC106605103	forkhead box protein O6-like
gene20746:106613721	764.896	-0.948469	0.179255	1.21526e-07	9.64556e-05	106613721	LOC106613721	minor histocompatibility protein HA-1-like
gene40114:106578993	426.652	-0.937588	0.177772	1.33397e-07	9.99961e-05	106578993	LOC106578993	SUN domain-containing protein 1-like
gene47855:106586622	148.995	-1.11677	0.21157	1.30256e-07	9.99961e-05	106586622	LOC106586622	neural cell adhesion molecule 1-like
gene21372:100380694	1641.09	-0.939222	0.180327	1.90431e-07	0.000138891	100380694	ptprc	protein tyrosine phosphatase, receptor type C
gene11493:106604826	395.136	-1.1086	0.213336	2.03055e-07	0.000144201	106604826	LOC106604826	dedicator of cytokinesis protein 2-like
gene39239:106578135	190.13	1.5003	0.289682	2.22937e-07	0.000150404	106578135	LOC106578135	uncharacterized LOC106578135
gene79:106599665	161.798	-1.25214	0.241639	2.19682e-07	0.000150404	106599665	LOC106599665	T-cell receptor beta-1 chain C region-like
gene45864:106584595	109.08	-1.54259	0.29878	2.43074e-07	0.00015999	106584595	LOC106584595	receptor-type tyrosine-protein phosphatase eta-like
gene8296:106601929	62.3605	-2.61417	0.508033	2.66568e-07	0.000171276	106601929	LOC106601929	E3 ubiquitin-protein ligase RNF213-like
gene70977:106599899	516.603	-1.32121	0.258206	3.10621e-07	0.00019494	106599899	LOC106599899	mucin-2-like
gene34116:106572970	103.727	-1.27881	0.251331	3.61585e-07	0.000221767	106572970	LOC106572970	rho guanine nucleotide exchange factor 3-like
gene15536:106608695	331.304	-1.41685	0.279719	4.07827e-07	0.000244569	106608695	LOC106608695	uncharacterized LOC106608695
gene18875:106611864	121.345	-1.4497	0.287438	4.56984e-07	0.000264193	106611864	LOC106611864	dedicator of cytokinesis protein 2-like
gene40609:106579484	62.2456	-1.84249	0.365411	4.6013e-07	0.000264193	106579484	LOC106579484	protein starmaker-like
gene35453:106574371	229.798	-0.920138	0.18418	5.85723e-07	0.000329298	106574371	LOC106574371	phospholipase A2 inhibitor 31 kDa subunit-like
gene3781:106577773	580.92	-0.877007	0.1759	6.1698e-07	0.000337998	106577773	LOC106577773	uncharacterized LOC106577773
gene50083:106588553	397.441	-0.750986	0.150711	6.26248e-07	0.000337998	106588553	LOC106588553	uncharacterized LOC106588553
gene22316:106561480	55.3625	-1.39276	0.282589	8.28299e-07	0.000430478	106561480	LOC106561480	fatty acyl-CoA reductase 1-like
gene33944:106572796	103.144	-1.23649	0.250897	8.29498e-07	0.000430478	106572796	LOC106572796	differentially expressed in FDCP 6 homolog
gene18368:106611417	444.552	-0.876709	0.178462	8.98831e-07	0.000457657	106611417	LOC106611417	T-cell receptor beta-2 chain C region-like
gene17769:106610817	215.232	-1.48088	0.302788	1.00419e-06	0.000501834	106610817	LOC106610817	runt-related transcription factor 3-like
gene15440:106608548	174.355	-1.49426	0.306156	1.05698e-06	0.000518611	106608548	LOC106608548	C-C motif chemokine 4-like
gene17667:106610719	87.9682	1.32528	0.273624	1.27614e-06	0.000614962	106610719	LOC106610719	prepronociceptin-like
gene24778:106563917	505.291	-1.24089	0.257231	1.40691e-06	0.000654601	106563917	LOC106563917	T-cell surface protein tactile-like
gene44653:106583491	202.647	-1.01761	0.210906	1.40026e-06	0.000654601	106583491	LOC106583491	DENN domain-containing protein 2D-like
gene20157:106613150	451.773	-0.803311	0.166904	1.48665e-06	0.000678268	106613150	LOC106613150	von Willebrand factor A domain-containing protein 5A-like
gene21530:106560701	47.9055	-1.56376	0.325095	1.50804e-06	0.000678268	106560701	prr5l	proline rich 5 like
gene16216:106609272	116.084	-1.03893	0.217271	1.73809e-06	0.00074705	106609272	prkcq	protein kinase C theta
gene28947:106567942	299.861	0.935269	0.195621	1.74402e-06	0.00074705	106567942	LOC106567942	cytoskeleton-associated protein 2-like
gene40197:106579312	115.59	-1.17656	0.246079	1.74223e-06	0.00074705	106579312	skap1	src kinase associated phosphoprotein 1
gene29306:106568165	237.053	-1.03524	0.216918	1.81983e-06	0.000767342	106568165	LOC106568165	interleukin-7 receptor subunit alpha-like
gene4318:100169853	170.559	-1.20969	0.253672	1.85404e-06	0.000769742	100169853	LOC100169853	truncated CD4-2A-like protein
gene2478:106565686	163.967	-0.893925	0.189686	2.44519e-06	0.000999786	106565686	fam78a	family with sequence similarity 78 member A
gene1337:106607826	281.493	1.10679	0.235198	2.52907e-06	0.00101865	106607826	LOC106607826	cyclin-dependent kinase 1-like
gene50255:106588679	252.006	1.03974	0.221354	2.63777e-06	0.00104681	106588679	LOC106588679	actin-binding protein anillin-like
gene4278:106583094	111.213	-1.0263	0.218699	2.69535e-06	0.00105415	106583094	LOC106583094	thyroid hormone receptor-associated protein 3-like
gene45156:106583912	219.745	-0.994503	0.212197	2.77638e-06	0.00107034	106583912	LOC106583912	mucin-2-like
gene43821:106582667	238.324	-0.914895	0.196438	3.20206e-06	0.0012023	106582667	LOC106582667	rho GTPase-activating protein 15-like
gene44340:106583223	125.236	1.05859	0.22731	3.20778e-06	0.0012023	106583223	fkbp11	FK506 binding protein 11
gene13182:106606534	132.332	-1.01135	0.218087	3.52846e-06	0.00130437	106606534	LOC106606534	interleukin-6 receptor subunit beta-like
gene20982:106613929	43.7905	-1.65394	0.356981	3.60187e-06	0.00131351	106613929	LOC106613929	uncharacterized LOC106613929
gene42072:106580924	142.127	-0.951601	0.206184	3.92543e-06	0.00139384	106580924	sorl1	sortilin related receptor 1
gene9248:106602826	74.9921	-1.16567	0.252476	3.89414e-06	0.00139384	106602826	LOC106602826	stromal interaction molecule 1-like
gene28517:106567409	305.385	-1.01488	0.220458	4.15408e-06	0.00145587	106567409	p2rx1	purinergic receptor P2X 1
gene4614:106588395	221.696	-1.07016	0.233037	4.38502e-06	0.0015171	106588395	LOC106588395	ras GTPase-activating protein nGAP-like
gene11910:106605274	184.688	-0.913512	0.199212	4.52639e-06	0.00154619	106605274	LOC106605274	raftlin-like
gene26486:106565679	411.583	-1.22134	0.266787	4.69532e-06	0.0015643	106565679	LOC106565679	integrin beta-7-like
gene47856:106586623	423.409	-1.02047	0.222853	4.6692e-06	0.0015643	106586623	LOC106586623	immunoglobulin superfamily member 3-like
gene18488:106611531	326.996	-0.836573	0.183399	5.07906e-06	0.00167151	106611531	sash3	SAM and SH3 domain containing 3
gene173:106608166	174.549	-1.11492	0.244698	5.20596e-06	0.00167248	106608166	LOC106608166	GTPase IMAP family member 7-like
gene18271:106611323	230.553	-1.0558	0.231694	5.19201e-06	0.00167248	106611323	LOC106611323	nesprin-1-like
gene25735:106564857	1599.01	0.720729	0.158554	5.47672e-06	0.00173876	106564857	LOC106564857	malate dehydrogenase, cytoplasmic-like
gene9482:106602924	189.877	-1.00935	0.22224	5.57934e-06	0.00175074	106602924	LOC106602924	regulator of G-protein signaling 14-like
gene25999:106565234	45.424	-2.12975	0.472041	6.42859e-06	0.00199405	106565234	LOC106565234	histone deacetylase 7-like
gene42501:106581353	61.6568	-1.41732	0.314467	6.57352e-06	0.00201583	106581353	LOC106581353	lysophosphatidic acid receptor 6-like
gene2042:106561374	112.671	-0.921929	0.204799	6.74343e-06	0.0020447	106561374	LOC106561374	zinc finger protein 462-like
gene38681:106577735	401.801	-1.0044	0.223517	7.00252e-06	0.00209967	106577735	LOC106577735	major centromere autoantigen B-like
gene70696:106594852	27.9455	-2.20894	0.492471	7.27723e-06	0.00215806	106594852	LOC106594852	uncharacterized LOC106594852
gene49660:106588209	206.567	-0.949359	0.2119	7.45664e-06	0.00218723	106588209	LOC106588209	uncharacterized LOC106588209
gene20234:100196843	736.256	0.965355	0.21634	8.11211e-06	0.00235391	100196843	folr1	Folate receptor alpha
gene407:106579491	236.748	-0.842256	0.189248	8.56572e-06	0.00245909	106579491	LOC106579491	runt-related transcription factor 3-like
gene20847:106614013	25.3364	-1.88772	0.425021	8.93466e-06	0.00248568	106614013	tmigd2	transmembrane and immunoglobulin domain containing 2
gene29249:106568211	178.453	-0.985574	0.221851	8.89173e-06	0.00248568	106568211	LOC106568211	uncharacterized threonine-rich GPI-anchored glycoprotein PJ4664.02-like
gene72409:106592944	1212.6	-1.68142	0.378352	8.82754e-06	0.00248568	106592944	LOC106592944	beta-2-microglobulin-like
gene47402:106586170	133.802	-0.980256	0.221335	9.47401e-06	0.00260883	106586170	LOC106586170	cytohesin-interacting protein-like
gene16330:106609386	68.9135	1.71252	0.387359	9.82373e-06	0.00267781	106609386	LOC106609386	poly [ADP-ribose] polymerase 12-like
gene24536:106563690	626.125	-0.721119	0.163236	9.97863e-06	0.00269283	106563690	LOC106563690	cytokine receptor common subunit gamma-like
gene35038:106573901	32.6412	-1.72207	0.390324	1.02467e-05	0.00273781	106573901	LOC106573901	interleukin-6 receptor subunit beta-like
gene26042:100136451	75.4991	-1.4353	0.325554	1.03946e-05	0.00275008	100136451	LOC100136451	CD8 beta
gene5252:106592158	118.879	-1.19426	0.271616	1.09832e-05	0.00287759	106592158	LOC106592158	DENN domain-containing protein 1B-like
gene30505:106569420	211.536	-1.0583	0.241024	1.12902e-05	0.0029296	106569420	LOC106569420	rho GTPase-activating protein 30-like
gene26211:100196383	167.317	-1.01017	0.230503	1.1735e-05	0.003016	100196383	rab37	Ras-related protein Rab-37
gene2270:106565782	195.066	-0.997449	0.22798	1.2134e-05	0.00308914	106565782	LOC106565782	granzyme K-like
gene11347:106604699	142.775	-1.1657	0.267853	1.34886e-05	0.00338787	106604699	LOC106604699	GDNF family receptor alpha-4-like
gene44532:106583314	296.867	-1.0383	0.238642	1.35585e-05	0.00338787	106583314	LOC106583314	serine/threonine-protein kinase 10-like
gene60030:106595418	9183.39	-1.15312	0.265455	1.3995e-05	0.00346485	106595418	LOC106595418	intestinal mucin-like protein
gene7768:106601395	283.279	1.13349	0.261226	1.43057e-05	0.00350958	106601395	LOC106601395	importin subunit alpha-1-like
gene2720:106568282	23.3203	-2.01458	0.464959	1.4721e-05	0.00354697	106568282	LOC106568282	WD repeat domain phosphoinositide-interacting protein 4-like
gene42019:106580893	145.704	-0.909553	0.209826	1.45896e-05	0.00354697	106580893	map4k1	mitogen-activated protein kinase kinase kinase kinase 1
gene11311:106604670	288.871	-0.795655	0.183729	1.48704e-05	0.00355125	106604670	LOC106604670	trichohyalin-like
gene32405:106571242	164.313	-0.770312	0.177998	1.50715e-05	0.00356772	106571242	LOC106571242	serine/threonine-protein kinase D3-like
gene25801:106564806	65.5408	-1.23785	0.286417	1.54722e-05	0.00363073	106564806	LOC106564806	uncharacterized LOC106564806
gene15842:106608950	122.971	-1.45795	0.338222	1.62782e-05	0.00372274	106608950	LOC106608950	uncharacterized protein C7orf43 homolog
gene27421:106566374	140.972	-0.845291	0.196074	1.62464e-05	0.00372274	106566374	LOC106566374	uncharacterized LOC106566374
gene40423:106579125	157.841	-0.92182	0.213705	1.60674e-05	0.00372274	106579125	cd79b	CD79b molecule
gene39240:106578136	54.1356	-1.36176	0.316232	1.66078e-05	0.0037662	106578136	LOC106578136	uncharacterized LOC106578136
gene2077:106561687	114.088	-1.02849	0.239592	1.76539e-05	0.00390497	106561687	LOC106561687	roquin-2-like
gene40614:106579503	131.633	-1.11559	0.259865	1.763e-05	0.00390497	106579503	LOC106579503	receptor-type tyrosine-protein kinase FLT3-like
gene44315:106583060	70.3345	-1.72659	0.401898	1.73834e-05	0.00390497	106583060	LOC106583060	integrin beta-7-like
gene21501:106560721	187.489	-1.2957	0.302419	1.8319e-05	0.00398676	106560721	LOC106560721	ankyrin repeat domain-containing protein 26-like
gene79758:100380615	159.892	-1.86451	0.435101	1.82544e-05	0.00398676	100380615	c1qb	complement component 1, q subcomponent, B chain
gene14681:106607854	513.546	-0.716852	0.167483	1.86771e-05	0.00400015	106607854	LOC106607854	uncharacterized LOC106607854
gene67765:106593716	51.0654	-1.58487	0.370133	1.85322e-05	0.00400015	106593716	LOC106593716	LETM1 and EF-hand domain-containing protein 1, mitochondrial-like
gene43595:106582436	282.482	-0.856097	0.200259	1.91189e-05	0.00406255	106582436	LOC106582436	major histocompatibility complex class I-related gene protein-like
gene32508:100195648	40.5244	-1.46482	0.343183	1.96943e-05	0.00411993	100195648	cf190	CF190 protein
gene42932:100196725	117.272	-1.03133	0.24155	1.95796e-05	0.00411993	100196725	cytip	cytohesin 1 interacting protein
gene40635:106579540	163.913	0.822869	0.19379	2.17444e-05	0.0045138	106579540	tagln3	transgelin 3
gene26091:106565145	50.7075	-1.35537	0.319535	2.2182e-05	0.00453488	106565145	LOC106565145	uncharacterized LOC106565145
gene64707:106594723	27.3883	-2.39033	0.563444	2.21183e-05	0.00453488	106594723	LOC106594723	uncharacterized LOC106594723
gene12518:106605867	2700.62	-1.15402	0.27232	2.25802e-05	0.00458156	106605867	LOC106605867	uncharacterized LOC106605867
gene16291:106609390	159.605	-1.13142	0.267161	2.28587e-05	0.00460346	106609390	LOC106609390	probable polypeptide N-acetylgalactosaminyltransferase 8
gene15894:106608989	338.251	-1.02815	0.243351	2.38964e-05	0.0047768	106608989	LOC106608989	SLAM family member 9-like
gene26807:106565705	65.1749	-1.15273	0.273435	2.48978e-05	0.00494039	106565705	LOC106565705	alpha-1,3-galactosyltransferase 2-like
gene2772:106568685	65.8384	-1.23735	0.293836	2.54225e-05	0.00500769	106568685	LOC106568685	prostaglandin E2 receptor EP4 subtype-like
gene36639:106575550	138.973	-0.854738	0.203195	2.59363e-05	0.00507187	106575550	LOC106575550	ATP-dependent RNA helicase DDX3X-like
gene22431:106561596	104.758	-0.938124	0.223312	2.65784e-05	0.00516004	106561596	LOC106561596	sodium-dependent neutral amino acid transporter B(0)AT2-like
gene39168:106578060	34.9633	-1.4378	0.342729	2.72679e-05	0.00525608	106578060	LOC106578060	N-acetyllactosaminide beta-1,3-N-acetylglucosaminyltransferase 3-like
gene28046:106566945	59.5311	-1.89403	0.45169	2.75027e-05	0.00525822	106566945	LOC106566945	phosphatidylinositol 3,4,5-trisphosphate-dependent Rac exchanger 1 protein-like
gene31040:106570069	62.9391	-1.25228	0.298742	2.76687e-05	0.00525822	106570069	LOC106570069	uncharacterized LOC106570069
gene16804:106609917	103.64	-1.01435	0.242231	2.82023e-05	0.00532215	106609917	LOC106609917	uncharacterized LOC106609917
gene41848:106580682	262.005	-0.890162	0.21268	2.84594e-05	0.00533337	106580682	LOC106580682	dedicator of cytokinesis protein 10-like
gene43456:106582292	35.234	-1.81789	0.434955	2.92174e-05	0.00540042	106582292	LOC106582292	zinc finger protein Helios-like
gene44582:100196052	131.092	-1.92287	0.460031	2.9166e-05	0.00540042	100196052	fkbp5	FK506 binding protein 5
gene13287:106606635	93.6822	-1.17298	0.281271	3.0422e-05	0.00554708	106606635	LOC106606635	uncharacterized LOC106606635
gene14958:100194943	55.8025	-1.41666	0.339588	3.02339e-05	0.00554708	100194943	ccr6	C-C chemokine receptor type 6
gene4952:106589692	25.6382	1.97135	0.473767	3.16849e-05	0.00573858	106589692	LOC106589692	uncharacterized LOC106589692
gene12122:106605407	21.8829	2.14702	0.517803	3.37751e-05	0.00594842	106605407	LOC106605407	tubulin beta chain-like
gene19585:100195943	141.615	-1.20163	0.289632	3.34216e-05	0.00594842	100195943	rnt2	Ribonuclease T2
gene45861:106584598	114.61	1.11744	0.269573	3.39457e-05	0.00594842	106584598	gtse1	G2 and S-phase expressed 1
gene51069:106589540	57.3749	-1.35049	0.325785	3.39292e-05	0.00594842	106589540	LOC106589540	SH3 domain-binding protein 1-like
gene5568:106595274	142.163	1.73854	0.418828	3.31092e-05	0.00594842	106595274	LOC106595274	OX-2 membrane glycoprotein-like
gene12019:106605368	72.6686	-1.37623	0.332692	3.52416e-05	0.00609635	106605368	LOC106605368	T-cell differentiation antigen CD6-like
gene29051:106567845	113.666	-1.36879	0.33079	3.50415e-05	0.00609635	106567845	LOC106567845	arf-GAP with Rho-GAP domain, ANK repeat and PH domain-containing protein 1-like
gene11701:106605061	86.2093	-2.10923	0.510123	3.55326e-05	0.00610754	106605061	LOC106605061	plectin-like
gene30908:106569780	307.965	-0.819246	0.19832	3.61314e-05	0.00617035	106569780	LOC106569780	T-cell differentiation antigen CD6-like
gene33431:106572046	221.536	-1.25453	0.303796	3.63553e-05	0.00617035	106572046	pik3cd	phosphatidylinositol-4,5-bisphosphate 3-kinase catalytic subunit delta
gene42276:106581167	278.53	-0.874053	0.212069	3.76314e-05	0.006347	106581167	LOC106581167	hypermethylated in cancer 1 protein-like
gene236:106561476	47.9547	-1.47435	0.358124	3.84042e-05	0.00643712	106561476	LOC106561476	platelet-activating factor receptor-like
gene52057:106590519	449.557	-0.586006	0.142477	3.90588e-05	0.00650643	106590519	LOC106590519	tumor necrosis factor ligand superfamily member 10-like
gene10449:106603899	234.264	-0.85464	0.208127	4.01976e-05	0.00661447	106603899	LOC106603899	lymphocyte cytosolic protein 2-like
gene51672:106590128	58.5238	-1.45361	0.353894	3.99995e-05	0.00661447	106590128	LOC106590128	plexin domain-containing protein 2-like
gene18670:106611681	210.376	-0.953569	0.232465	4.0962e-05	0.00664552	106611681	LOC106611681	mucin-22-like
gene33058:106571892	186.231	-0.752591	0.183511	4.11251e-05	0.00664552	106571892	LOC106571892	FYVE, RhoGEF and PH domain-containing protein 3-like
gene43999:106582838	677.223	-0.966282	0.235457	4.06332e-05	0.00664552	106582838	bpifb2	BPI fold containing family B member 2
gene19017:100195398	200.6	-1.43638	0.352087	4.51131e-05	0.00724657	100195398	al3a2	Fatty aldehyde dehydrogenase
gene32081:106570943	47.1291	1.44351	0.354488	4.65889e-05	0.00739558	106570943	LOC106570943	E3 ubiquitin/ISG15 ligase TRIM25-like
gene59543:106591353	3846.82	1.12202	0.27547	4.63864e-05	0.00739558	106591353	LOC106591353	uncharacterized LOC106591353
gene29996:106568942	52.4936	-1.53163	0.376836	4.81442e-05	0.00759777	106568942	LOC106568942	ceramide synthase 2-like
gene12282:106605619	187.273	-1.00482	0.247777	5.00571e-05	0.00785373	106605619	LOC106605619	uncharacterized LOC106605619
gene1764:106612469	565.732	-0.679434	0.167771	5.12662e-05	0.00799693	106612469	LOC106612469	nucleolar RNA helicase 2-like
gene15960:106609066	45.5837	-1.65104	0.407994	5.19403e-05	0.00802928	106609066	LOC106609066	uncharacterized LOC106609066
gene28392:106567248	179.428	-0.844338	0.208949	5.32514e-05	0.00802928	106567248	LOC106567248	wiskott-Aldrich syndrome protein-like
gene31970:106570829	2858.82	0.783599	0.193894	5.31364e-05	0.00802928	106570829	hmgcr	3-hydroxy-3-methylglutaryl-CoA reductase
gene39018:106577918	82.8384	-1.09859	0.271874	5.32646e-05	0.00802928	106577918	LOC106577918	uncharacterized protein C7orf43 homolog
gene43991:106582833	36.1281	-1.41153	0.349004	5.24441e-05	0.00802928	106582833	LOC106582833	ras association domain-containing protein 5-like
gene47110:106585863	134.696	-1.22209	0.302531	5.35563e-05	0.00802928	106585863	rasef	RAS and EF-hand domain containing
gene6924:106600547	35.3948	-1.79684	0.444763	5.34541e-05	0.00802928	106600547	LOC106600547	solute carrier family 17 member 9-like
gene27764:106566613	105.249	-0.936075	0.232058	5.48816e-05	0.00813755	106566613	LOC106566613	uncharacterized LOC106566613
gene43408:106582249	895.296	-0.890642	0.220728	5.45974e-05	0.00813755	106582249	LOC106582249	plastin-2
gene50456:106588883	205.876	-1.28856	0.319712	5.56902e-05	0.00821233	106588883	LOC106588883	inactive phospholipase C-like protein 2
gene37015:106575926	39.5663	-1.277	0.317056	5.63256e-05	0.00826089	106575926	LOC106575926	LIM domain only protein 7-like
gene20873:106613835	205.315	-0.819931	0.204077	5.87556e-05	0.0085707	106613835	LOC106613835	leupaxin-like
gene13596:106606846	74.6937	-1.16948	0.291283	5.94662e-05	0.00862772	106606846	LOC106606846	tumor necrosis factor ligand superfamily member 14-like
gene49749:106588494	153.795	-0.954228	0.238249	6.1971e-05	0.00894304	106588494	LOC106588494	annexin A2-like
gene15490:106608597	1482.91	-0.929698	0.232321	6.28695e-05	0.00898283	106608597	LOC106608597	ependymin-like
gene27422:106566375	92.9397	-0.945997	0.236404	6.29124e-05	0.00898283	106566375	LOC106566375	TRAF3-interacting JNK-activating modulator-like
gene47004:106585784	91.5214	-0.935934	0.234011	6.34677e-05	0.00901442	106585784	LOC106585784	TNF receptor-associated factor 1-like
gene24770:106563910	548.546	-1.31328	0.328884	6.5208e-05	0.00907328	106563910	LOC106563910	hephaestin-like protein 1
gene27980:100195150	371.13	0.950441	0.237928	6.47872e-05	0.00907328	100195150	tpx2	Targeting protein for Xklp2
gene30390:106569134	46.4621	-1.45388	0.363996	6.49107e-05	0.00907328	106569134	LOC106569134	voltage-dependent R-type calcium channel subunit alpha-1E-like
gene55511:106591664	72.9171	-1.17864	0.295171	6.5227e-05	0.00907328	106591664	LOC106591664	carcinoembryonic antigen-related cell adhesion molecule 5-like
gene38650:106577552	245.915	-0.875562	0.219445	6.61009e-05	0.00914769	106577552	LOC106577552	macrophage-capping protein-like
gene19530:106612744	52.1734	-1.42168	0.356688	6.72543e-05	0.00925982	106612744	LOC106612744	uncharacterized LOC106612744
gene35017:106573878	18.8975	2.0284	0.509613	6.88388e-05	0.00938224	106573878	LOC106573878	guanidinoacetate N-methyltransferase
gene5101:106591126	55.0646	-1.50449	0.37792	6.86338e-05	0.00938224	106591126	LOC106591126	interleukin-2 receptor subunit beta-like
gene5025:106590395	92.1194	-1.03529	0.260553	7.0844e-05	0.00955898	106590395	LOC106590395	uncharacterized LOC106590395
gene8994:106602649	78.3644	-1.01598	0.255688	7.08254e-05	0.00955898	106602649	LOC106602649	T-cell surface glycoprotein CD5-like
gene33218:106572328	30.2967	-1.41967	0.35755	7.17107e-05	0.00962778	106572328	LOC106572328	forkhead box protein P1-B-like
gene24331:106563463	163.89	0.94995	0.239509	7.30158e-05	0.00971517	106563463	LOC106563463	sororin-B-like
gene2943:100380555	62.8727	2.46428	0.621348	7.30816e-05	0.00971517	100380555	ncs1	Neuronal calcium sensor 1
gene454:106583826	142.296	-0.951715	0.24009	7.37075e-05	0.00975035	106583826	LOC106583826	phospholipase D4-like
gene25241:106564390	74.9142	-1.25964	0.317968	7.44712e-05	0.00980331	106564390	LOC106564390	interleukin-2 receptor subunit beta-like
gene10392:106603843	280.165	-0.886003	0.223885	7.57675e-05	0.00992554	106603843	LOC106603843	serine/threonine-protein kinase 10-like
gene14315:106607426	77.4828	-1.1354	0.287019	7.62653e-05	0.00994249	106607426	LOC106607426	GEM-interacting protein-like
gene74321:100380299	145.006	1.31946	0.333732	7.69729e-05	0.00998649	100380299	actn1	actinin alpha 1
gene10356:106603807	221.372	-0.947344	0.239725	7.75653e-05	0.0100152	106603807	sytl2	synaptotagmin like 2
gene31777:106570640	63.6214	-1.06646	0.270078	7.85752e-05	0.0100973	106570640	LOC106570640	synaptotagmin-like protein 1
gene16363:100196789	443.824	-0.902658	0.228847	8.00094e-05	0.0102329	100196789	hcls1	hematopoietic cell-specific Lyn substrate 1
gene14374:100196700	112.44	-0.926636	0.235549	8.35614e-05	0.0106218	100196700	tagap	T-cell activation GTPase activating protein
gene30002:106568936	665.402	-1.53876	0.391229	8.38376e-05	0.0106218	106568936	LOC106568936	GTPase IMAP family member 7-like
gene14351:106607561	32.5701	-6.09539	1.5539	8.75843e-05	0.0110046	106607561	LOC106607561	rho-associated protein kinase 2-like
gene44880:106583670	65.6103	-1.20032	0.306018	8.76744e-05	0.0110046	106583670	LOC106583670	nuclear factor of activated T-cells, cytoplasmic 2-like
gene7400:106601029	397.749	-0.697077	0.177866	8.88715e-05	0.0111032	106601029	LOC106601029	serine/threonine-protein kinase 17A-like
gene38342:100195800	209.807	0.709608	0.18112	8.93268e-05	0.0111086	100195800	cj058	CJ058 protein
gene17604:106610662	316.924	-0.708529	0.181083	9.12578e-05	0.0112967	106610662	LOC106610662	DNA-binding protein inhibitor ID-3-A-like
gene43262:106582048	136.852	-0.893361	0.228664	9.34979e-05	0.0115212	106582048	LOC106582048	T-cell surface antigen CD2-like
gene15902:106608995	47.1935	-1.57957	0.404628	9.47061e-05	0.0115926	106608995	LOC106608995	serine/threonine-protein kinase D3-like
gene7398:106601028	179.372	1.15125	0.294951	9.4937e-05	0.0115926	106601028	LOC106601028	polymerase I and transcript release factor-like
gene18913:106611874	146.81	-1.13999	0.292325	9.63027e-05	0.0117064	106611874	LOC106611874	macrophage colony-stimulating factor 1 receptor 1-like
gene32753:100380480	157.425	-1.02698	0.263422	9.67446e-05	0.0117074	100380480	gp132	Probable G-protein coupled receptor 132
gene12611:106605963	411.511	0.691103	0.1774	9.79067e-05	0.0117951	106605963	LOC106605963	maestro heat-like repeat-containing protein family member 1
gene3047:100380388	221.732	-0.853251	0.219189	9.9109e-05	0.011879	100380388	syk	spleen associated tyrosine kinase
gene47564:106586306	17.2636	-2.23218	0.573554	9.94832e-05	0.011879	106586306	LOC106586306	transmembrane protein 163-like
gene42471:106581332	23.1596	-1.59354	0.409689	0.000100397	0.0118943	106581332	LOC106581332	von Willebrand factor A domain-containing protein 7-like
gene924:106603506	134.462	-0.913859	0.234962	0.000100493	0.0118943	106603506	LOC106603506	nesprin-1-like
gene41166:106580033	30.4425	1.56546	0.4031	0.000102946	0.0120436	106580033	LOC106580033	glycine dehydrogenase (decarboxylating), mitochondrial-like
gene44805:106583643	298.389	-0.695105	0.179052	0.000103539	0.0120436	106583643	LOC106583643	bridging integrator 2-like
gene73870:106596795	17.3657	-1.87148	0.481821	0.000102674	0.0120436	106596795	LOC106596795	E3 ubiquitin-protein ligase MYLIP-A-like
gene8711:106602302	138.123	0.884085	0.227702	0.00010333	0.0120436	106602302	LOC106602302	PC4 and SFRS1-interacting protein-like
gene51273:106589722	40.959	-1.40903	0.363253	0.000104922	0.012152	106589722	epas1	endothelial PAS domain protein 1
gene49876:106588377	1419.57	-1.42822	0.368622	0.000106851	0.0123226	106588377	LOC106588377	H-2 class I histocompatibility antigen, Q10 alpha chain-like
gene6529:106599909	47.1704	-1.33998	0.346087	0.000108039	0.0124066	106599909	LOC106599909	interferon regulatory factor 4-like
gene75642:106592135	175.961	-0.900331	0.232712	0.000109344	0.0125032	106592135	LOC106592135	pro-interleukin-16-like
gene80191:106593352	1265.53	-2.47787	0.641085	0.000111039	0.0126434	106593352	LOC106593352	mucin-2-like
gene29187:106568122	20.8058	-1.98186	0.513106	0.000112248	0.0126741	106568122	LOC106568122	fibroblast growth factor receptor homolog 1-like
gene29459:106568412	130.884	-0.863549	0.223561	0.000112144	0.0126741	106568412	LOC106568412	hippocampus abundant transcript 1 protein-like
gene13798:106607056	33.0168	-1.45074	0.375903	0.000113687	0.0126775	106607056	LOC106607056	heme oxygenase-like
gene29763:100195489	56.7484	-1.26086	0.32664	0.000113347	0.0126775	100195489	ccr9	C-C chemokine receptor type 9
gene57054:106591461	72.7934	-1.62233	0.420201	0.000113	0.0126775	106591461	LOC106591461	NACHT, LRR and PYD domains-containing protein 1-like
gene25628:106564951	163.638	-0.933914	0.242195	0.000115241	0.0127979	106564951	LOC106564951	protein AF-17-like
gene36394:100196679	8769.69	0.485201	0.126005	0.000117812	0.0129767	100196679	LOC100196679	ATP synthase subunit beta, mitochondrial
gene49680:106588223	58.1731	-1.24793	0.324018	0.000117436	0.0129767	106588223	gdf6	growth differentiation factor 6
gene24338:106563456	214.633	-0.835173	0.2173	0.000121337	0.0133106	106563456	LOC106563456	fermitin family homolog 3-like
gene4676:106587895	152.118	-0.76789	0.199866	0.000122022	0.0133316	106587895	LOC106587895	protein AF-17-like
gene35358:106574367	17.7549	-2.53958	0.662122	0.000125302	0.0135256	106574367	LOC106574367	trifunctional purine biosynthetic protein adenosine-3-like
gene36805:106575699	1297.34	-0.930743	0.242626	0.000124996	0.0135256	106575699	LOC106575699	carboxypeptidase O-like
gene56645:100380615	561.769	-1.29148	0.336619	0.000124743	0.0135256	100380615	c1qb	complement component 1, q subcomponent, B chain
gene7210:100195519	67.7419	-1.38939	0.362489	0.000126637	0.0136153	100195519	il2rb	interleukin 2 receptor subunit beta
gene3809:106578554	211.866	1.39967	0.366484	0.000133891	0.014338	106578554	LOC106578554	V-set domain containing T-cell activation inhibitor 1-like
gene1378:106608814	166.913	1.3302	0.348608	0.000135776	0.0144103	106608814	LOC106608814	VIP peptides-like
gene41232:106579966	89.8621	-0.849212	0.222494	0.000135199	0.0144103	106579966	LOC106579966	ral guanine nucleotide dissociation stimulator-like
gene499:106589171	181.631	-1.02618	0.268984	0.000136168	0.0144103	106589171	LOC106589171	RAS guanyl-releasing protein 1-like
gene41294:106579922	199.627	-1.09959	0.288314	0.000136811	0.0144219	106579922	LOC106579922	E3 ubiquitin-protein ligase DTX1-like
gene34176:106573028	163.478	-0.704064	0.184737	0.000138314	0.0145235	106573028	LOC106573028	tyrosine-protein kinase CSK-like
gene1172:106606089	239.27	0.764356	0.200812	0.000141048	0.0146397	106606089	LOC106606089	glutamate dehydrogenase, mitochondrial-like
gene17760:100194878	158.494	-0.840071	0.220602	0.000140045	0.0146397	100194878	lck	lymphocyte-specific protein tyrosine kinase
gene9859:106603324	60.0612	-1.07539	0.282489	0.000140747	0.0146397	106603324	LOC106603324	connector enhancer of kinase suppressor of ras 2-like
gene15713:106608837	1376.95	-0.716208	0.18836	0.000143344	0.0146725	106608837	LOC106608837	uncharacterized protein DDB_G0290685-like
gene20394:106613382	591.157	-0.869537	0.228541	0.000141954	0.0146725	106613382	aplp2	amyloid beta precursor like protein 2
gene39007:106577894	141.916	-1.10668	0.291078	0.000143539	0.0146725	106577894	LOC106577894	uncharacterized LOC106577894
gene6274:106599151	119.12	-1.54112	0.405249	0.000143018	0.0146725	106599151	LOC106599151	acyl-coenzyme A thioesterase 11-like
gene46016:106584748	157.484	0.890869	0.234448	0.000144778	0.0147433	106584748	LOC106584748	protein regulator of cytokinesis 1-like
gene21423:106560616	46.6125	-1.37143	0.361641	0.000149291	0.0151458	106560616	LOC106560616	solute carrier organic anion transporter family member 2A1-like
gene14898:100217349	496.297	0.688902	0.182111	0.000155039	0.0156023	100217349	mmsa	Methylmalonate-semialdehyde dehydrogenase
gene27758:106566619	264.836	-0.943337	0.249423	0.000155526	0.0156023	106566619	LOC106566619	interleukin-17 receptor E-like
gene32392:106571260	52.6079	-1.16439	0.307727	0.00015442	0.0156023	106571260	LOC106571260	transcription factor E2F6-like
gene22969:106562116	85.1216	-1.41853	0.375238	0.00015661	0.0156529	106562116	LOC106562116	semaphorin-7A-like
gene25688:100380800	229.36	-0.879919	0.233156	0.000160682	0.0160007	100380800	ngap	Ras GTPase-activating protein nGAP
gene2192:106562702	1325.96	0.562305	0.149281	0.000165374	0.0163472	106562702	LOC106562702	voltage-dependent anion-selective channel protein 2-like
gene28197:106567079	89.4132	-0.93359	0.247802	0.000164902	0.0163472	106567079	LOC106567079	arf-GAP with GTPase, ANK repeat and PH domain-containing protein 2-like
gene2777:106568736	606.785	-1.15625	0.307246	0.000167703	0.0165169	106568736	LOC106568736	formin-binding protein 1-like
gene33640:106572505	104.798	-1.00798	0.268103	0.000170145	0.0166254	106572505	LOC106572505	uncharacterized LOC106572505
gene34264:106573105	95.5857	1.09547	0.291432	0.000170652	0.0166254	106573105	LOC106573105	aurora kinase B-like
gene54589:106591209	270.892	-0.634233	0.168705	0.000170305	0.0166254	106591209	LOC106591209	serine/threonine-protein kinase/endoribonuclease IRE1-like
gene39839:106578753	64.7584	-1.06728	0.284472	0.000175585	0.0170444	106578753	LOC106578753	HEAT repeat-containing protein 5B-like
gene8565:106602219	78.7015	-1.36373	0.363855	0.000178252	0.0172413	106602219	LOC106602219	ecto-ADP-ribosyltransferase 5-like
gene45538:106584302	36.9956	-1.32223	0.352935	0.000179395	0.0172898	106584302	LOC106584302	lysosome-associated membrane glycoprotein 3-like
gene37981:100195863	126.225	-0.80833	0.215844	0.000180416	0.0172986	100195863	cst7	cystatin F
gene47410:106586177	100.924	-0.888593	0.237308	0.000180768	0.0172986	106586177	LOC106586177	WD repeat, SAM and U-box domain-containing protein 1-like
gene30812:106569698	295.209	1.02306	0.273564	0.000184218	0.0175046	106569698	LOC106569698	protein FAM111A-like
gene34469:106573334	251.146	1.19036	0.318278	0.000184019	0.0175046	106573334	LOC106573334	PCNA-associated factor-like
gene2342:100380465	176.828	0.799752	0.214184	0.000188509	0.0178495	100380465	cor1c	Coronin-1C
gene7687:100286446	2605.85	1.04016	0.278702	0.000189856	0.0179141	100286446	cnn1	calponin 1
gene36935:106575843	30.5894	-1.43441	0.384599	0.000191768	0.017969	106575843	LOC106575843	uncharacterized LOC106575843
gene41970:100136516	401.961	-1.04523	0.28025	0.000191749	0.017969	100136516	cd3e	CD3e molecule
gene25646:106564936	58.5241	-1.1446	0.307203	0.000194628	0.0180782	106564936	LOC106564936	integrin alpha-L-like
gene26795:106565716	119.441	-0.832353	0.223356	0.000194093	0.0180782	106565716	LOC106565716	ras association domain-containing protein 5-like
gene9422:106602874	1526.27	0.722927	0.194049	0.000194944	0.0180782	106602874	LOC106602874	histone H2AX
gene3325:106573899	190.512	-0.773919	0.207806	0.000195906	0.0181052	106573899	LOC106573899	syndecan-2-like
gene19635:100136515	170.719	-0.858565	0.230633	0.000197147	0.0181577	100136515	LOC100136515	CD3gammadelta-A
gene46264:106585180	67.7821	-0.955095	0.256654	0.000198175	0.0181903	106585180	LOC106585180	zinc finger protein 366-like
gene11432:100196601	95.6108	1.00952	0.271733	0.0002031	0.0185792	100196601	grhpr	glyoxylate reductase/hydroxypyruvate reductase
gene38981:106577851	42.6455	-1.27442	0.343278	0.000205227	0.0187103	106577851	LOC106577851	uncharacterized LOC106577851
gene79760:106591842	315.809	-1.27343	0.343156	0.000206489	0.018762	106591842	LOC106591842	complement C1q subcomponent subunit C-like
gene11122:106604456	270.329	0.736857	0.19869	0.000208424	0.0188112	106604456	timm8a	translocase of inner mitochondrial membrane 8A
gene73173:106599190	98.1371	-0.871168	0.234897	0.0002083	0.0188112	106599190	LOC106599190	phosphoglucomutase-2-like
gene34287:106573117	259.478	0.752542	0.203306	0.000214311	0.019278	106573117	LOC106573117	testin-like
gene23840:100136503	80.7629	-0.941244	0.254427	0.00021605	0.0193057	100136503	sr-bi	scavenger receptor class B type I
gene40096:106578972	492.574	-0.741378	0.200392	0.000215908	0.0193057	106578972	LOC106578972	myoferlin-like
gene24850:100380611	210.572	-1.13835	0.307875	0.00021777	0.0193952	100380611	arc1b	Actin-related protein 2/3 complex subunit 1B
gene26250:106565373	191.614	0.938636	0.253987	0.000219361	0.0194088	106565373	LOC106565373	citron Rho-interacting kinase-like
gene43705:106582535	43.039	-1.34597	0.364144	0.000218791	0.0194088	106582535	LOC106582535	fer-1-like protein 6
gene11607:100136420	2603.94	-0.466686	0.12651	0.000225189	0.0196665	100136420	LOC100136420	lysozyme g
gene42587:106581440	56.3866	-1.14008	0.309027	0.000224904	0.0196665	106581440	LOC106581440	lysosomal amino acid transporter 1 homolog
gene43415:106582256	317.081	-0.53734	0.145587	0.000223497	0.0196665	106582256	LOC106582256	mitogen-activated protein kinase kinase kinase kinase 4-like
gene46950:106585690	379.576	-0.85437	0.231515	0.000223958	0.0196665	106585690	vps13a	vacuolar protein sorting 13 homolog A
gene12073:106605440	973.418	0.605674	0.16454	0.000232307	0.0201608	106605440	LOC106605440	uncharacterized LOC106605440
gene42675:106581520	37.1215	-1.27754	0.347065	0.000232343	0.0201608	106581520	LOC106581520	fibroblast growth factor receptor homolog 1-like
gene4680:106588537	152.575	-0.916012	0.248965	0.000233899	0.0202307	106588537	LOC106588537	C-C chemokine receptor type 7-like
gene24037:106563318	329.614	1.06339	0.289177	0.000235725	0.0203236	106563318	ccnb1	cyclin B1
gene49838:106588410	20.5024	2.17038	0.590367	0.000236626	0.0203363	106588410	LOC106588410	uncharacterized LOC106588410
gene31431:106570296	206.67	0.920493	0.251384	0.000250546	0.0214642	106570296	LOC106570296	actin-binding protein anillin-like
gene19033:106612016	86.2463	1.06702	0.291659	0.000253739	0.0216119	106612016	LOC106612016	centromere protein U-like
gene2097:106561820	641.186	0.802546	0.219375	0.000253871	0.0216119	106561820	LOC106561820	integrin alpha-1-like
gene25955:106565275	143.612	-0.748324	0.204748	0.000257323	0.0218368	106565275	LOC106565275	TOX high mobility group box family member 2-like
gene2547:106566708	226.792	1.08618	0.297451	0.000260595	0.0219263	106566708	LOC106566708	G2/mitotic-specific cyclin-B1-like
gene27194:106566136	146.129	-1.00472	0.275186	0.000261143	0.0219263	106566136	LOC106566136	rho GTPase-activating protein 12-like
gene29237:106568226	130.32	-0.989313	0.271	0.000261628	0.0219263	106568226	LOC106568226	lysine-specific demethylase 2B-like
gene6648:106600392	145.759	-0.763494	0.209033	0.000259703	0.0219263	106600392	LOC106600392	rho GTPase-activating protein 30-like
gene48634:106587407	757.165	1.23986	0.339817	0.000263662	0.0220284	106587407	LOC106587407	uncharacterized LOC106587407
gene47434:106586079	48.435	-1.61064	0.441768	0.000266464	0.0221255	106586079	LOC106586079	bile salt export pump-like
gene51203:106589645	165.65	-0.798057	0.218852	0.000265781	0.0221255	106589645	LOC106589645	rho GTPase-activating protein 12-like
gene2288:106563758	165.181	-0.982701	0.269621	0.000267651	0.0221559	106563758	LOC106563758	interleukin-7 receptor subunit alpha-like
gene10026:106603543	157.661	0.728325	0.199955	0.000270063	0.022208	106603543	LOC106603543	cytoskeleton-associated protein 2-like
gene47316:106586064	16.1821	-3.11547	0.855135	0.000269215	0.022208	106586064	LOC106586064	striated muscle preferentially expressed protein kinase-like
gene70688:106593652	102.152	-1.07213	0.294397	0.00027075	0.022208	106593652	LOC106593652	rho guanine nucleotide exchange factor 1-like
gene20718:100195128	1455.11	0.649727	0.178484	0.000272363	0.0222727	100195128	tpm4	tropomyosin 4
rna133458	85.7929	-1.14681	0.31547	0.000277731	0.022643	rna133458	NA	NA
gene39916:106578810	2359.56	-0.764549	0.210384	0.000278984	0.0226767	106578810	LOC106578810	prosaposin-like
gene39466:106578374	108.598	-0.837595	0.230612	0.000281178	0.0227864	106578374	LOC106578374	TRAF2 and NCK-interacting protein kinase-like
gene36085:106575016	96.5929	-0.994019	0.273859	0.000283772	0.0229277	106575016	LOC106575016	LIM domain only protein 7-like
gene20232:106613219	209.199	0.66145	0.182365	0.00028665	0.0230912	106613219	inppl1	inositol polyphosphate phosphatase like 1
gene14640:106607821	148.878	-0.813947	0.224834	0.000294367	0.023272	106607821	hivep2	human immunodeficiency virus type I enhancer binding protein 2
gene14855:106608040	20.265	-1.65022	0.456142	0.000297144	0.023272	106608040	LOC106608040	1-phosphatidylinositol 4,5-bisphosphate phosphodiesterase beta-4-like
gene27413:106566383	142.668	0.899761	0.24872	0.000297384	0.023272	106566383	LOC106566383	alpha-enolase
gene27847:100196705	357.884	-1.24513	0.34389	0.000293771	0.023272	100196705	bpi	Bactericidal permeability-increasing protein
gene32581:100196484	341.901	0.883692	0.244233	0.000296622	0.023272	100196484	topk	Lymphokine-activated killer T-cell-originated protein kinase homolog
gene38371:106577279	522.721	-1.21666	0.335963	0.000292999	0.023272	106577279	LOC106577279	interferon-induced very large GTPase 1-like
gene46297:106585157	137.347	1.19942	0.33171	0.000299343	0.023272	106585157	LOC106585157	phosphoglucomutase-like protein 5
gene47368:106586138	416.419	-0.971879	0.268364	0.00029291	0.023272	106586138	LOC106586138	uncharacterized LOC106586138
gene49755:100195587	214.626	1.11017	0.30693	0.000298019	0.023272	100195587	borea	Borealin
gene53:106582002	69.5482	-0.968103	0.267786	0.000300106	0.023272	106582002	LOC106582002	papilin-like
gene7211:106600882	115.934	1.61344	0.445996	0.000297323	0.023272	106600882	c1qtnf6	C1q and TNF related 6
gene7324:106600798	129.068	-1.0582	0.292656	0.000299351	0.023272	106600798	LOC106600798	flocculation protein FLO11-like
gene77010:106595322	40.7573	1.30144	0.35941	0.000293403	0.023272	106595322	LOC106595322	palmitoyltransferase ZDHHC3 pseudogene
gene20457:106613442	225.439	-0.7289	0.201796	0.000303773	0.0233652	106613442	prkacb	protein kinase cAMP-activated catalytic subunit beta
gene24055:106563296	251.943	-0.832441	0.230375	0.000302195	0.0233652	106563296	LOC106563296	PH and SEC7 domain-containing protein 1-like
gene4572:106585713	47.3159	-1.18697	0.328761	0.000305669	0.0233652	106585713	LOC106585713	cytoplasmic phosphatidylinositol transfer protein 1-like
gene51627:106590084	260.193	0.832984	0.230734	0.000306013	0.0233652	106590084	LOC106590084	cell death activator CIDE-A-like
gene59271:106595077	114.617	1.26965	0.351533	0.000304139	0.0233652	106595077	LOC106595077	uncharacterized LOC106595077
gene9673:106603123	333.517	-0.987715	0.273625	0.000306503	0.0233652	106603123	LOC106603123	signal-induced proliferation-associated 1-like protein 2
gene8325:106601961	19.7285	-1.7682	0.48999	0.000307813	0.023399	106601961	LOC106601961	cytokine receptor-like factor 3
gene19957:106613039	85.0099	-1.06553	0.295368	0.000309193	0.0234379	106613039	LOC106613039	hypermethylated in cancer 1 protein-like
gene24411:106563566	82.0512	-1.18647	0.329026	0.000310945	0.0235047	106563566	LOC106563566	G-protein coupled receptor 64-like
gene40038:106578930	278.394	-0.871946	0.241984	0.000314182	0.023683	106578930	LOC106578930	NACHT, LRR and PYD domains-containing protein 3-like
gene18446:100380299	400.947	1.3105	0.363948	0.000317261	0.0238485	100380299	actn1	actinin alpha 1
gene20240:106613229	244.386	1.00984	0.280745	0.000321907	0.0239653	106613229	numa1	nuclear mitotic apparatus protein 1
gene20697:106613676	296.09	0.917565	0.255048	0.000321154	0.0239653	106613676	LOC106613676	nicotinamide riboside kinase 2-like
gene32514:106571356	103.557	-0.990032	0.275128	0.000320124	0.0239653	106571356	LOC106571356	lethal(3)malignant brain tumor-like protein 3
gene588:100195680	589.139	0.899133	0.249993	0.000322367	0.0239653	100195680	LOC100195680	transforming acidic coiled-coil-containing protein 3
gene46700:106585497	57.5076	1.38995	0.386675	0.000324851	0.0240836	106585497	LOC106585497	calcium-binding protein 1-like
gene3433:106574835	272.067	-1.05217	0.29292	0.000328161	0.0242623	106574835	LOC106574835	uncharacterized LOC106574835
gene35377:106574324	144.338	-0.820241	0.228526	0.000331618	0.0243843	106574324	LOC106574324	ATP-binding cassette sub-family B member 6, mitochondrial-like
gene7839:106601465	102.183	-0.985787	0.274636	0.0003314	0.0243843	106601465	LOC106601465	cytohesin-3-like
gene44782:106583599	1946.28	1.09541	0.305575	0.000337389	0.024709	106583599	LOC106583599	myosin regulatory light polypeptide 9
gene7292:106600827	95.0407	1.06367	0.296752	0.000337865	0.024709	106600827	LOC106600827	uncharacterized LOC106600827
gene21388:106560582	129.944	-0.833532	0.232881	0.000344627	0.0250676	106560582	dlg1	discs large MAGUK scaffold protein 1
gene28736:106567640	26.4848	1.64391	0.459227	0.000343957	0.0250676	106567640	LOC106567640	histone H2A
gene37112:100195468	243.883	0.991719	0.277208	0.000346865	0.0251626	100195468	ldhb	L-lactate dehydrogenase B chain
gene43847:106582687	80.431	-0.997366	0.278931	0.000349321	0.0252729	106582687	LOC106582687	kinesin-like protein KIF21B
gene64598:106591355	61.3466	-0.953905	0.266872	0.000351035	0.025329	106591355	LOC106591355	neurobeachin-like protein 2
gene19899:106612918	103.124	-0.77101	0.215786	0.000352863	0.0253612	106612918	LOC106612918	uncharacterized LOC106612918
gene42102:106580963	490.576	0.892851	0.249912	0.000353362	0.0253612	106580963	LOC106580963	structural maintenance of chromosomes protein 4-like
gene50215:106588646	714.838	0.725104	0.203099	0.000356707	0.0255334	106588646	LOC106588646	stathmin-like
gene40278:106579241	114.942	-1.19859	0.335928	0.000359707	0.02568	106579241	LOC106579241	uncharacterized LOC106579241
gene34232:106573078	2810.12	1.03994	0.291622	0.000362411	0.0258048	106573078	LOC106573078	non-muscle caldesmon-like
gene35148:106574040	56.2529	-1.81104	0.507992	0.00036374	0.0258313	106574040	LOC106574040	PDZK1-interacting protein 1-like
gene25216:106564366	182.067	-0.706257	0.198477	0.000373142	0.0264294	106564366	LOC106564366	transmembrane channel-like protein 6
gene15608:106608772	36.031	-1.27807	0.359697	0.000380598	0.0267619	106608772	LOC106608772	probable G-protein coupled receptor 148
gene27388:100380643	6034.27	0.919455	0.25878	0.000380811	0.0267619	100380643	LOC100380643	filamin-A
gene27921:106566871	18.3443	-1.82807	0.514322	0.000378956	0.0267619	106566871	LOC106566871	uncharacterized LOC106566871
gene21910:106560844	31.7191	-1.28393	0.361508	0.000382899	0.0268387	106560844	LOC106560844	core-binding factor subunit beta-like
gene48585:106587345	201.396	1.26175	0.355524	0.000386708	0.0270355	106587345	LOC106587345	retinal dehydrogenase 2-like
gene28099:106566995	96.5676	0.88633	0.249941	0.000390902	0.027069	106566995	LOC106566995	uncharacterized LOC106566995
gene29605:106568528	53.0152	-1.49147	0.420559	0.000390522	0.027069	106568528	LOC106568528	phospholipid-transporting ATPase IC-like
gene30701:106569590	22.535	-1.82957	0.515962	0.0003912	0.027069	106569590	LOC106569590	uncharacterized LOC106569590
gene70976:106595406	29.0267	-1.7665	0.498012	0.000389487	0.027069	106595406	LOC106595406	uncharacterized LOC106595406
gene1729:100195137	193.827	0.918127	0.259116	0.000395143	0.027272	100195137	prim2	DNA primase subunit 2
gene19644:106612633	5739.64	1.12319	0.31729	0.000400212	0.0275513	106612633	LOC106612633	transgelin-like
gene15476:106608585	249.079	-0.689363	0.194844	0.000403133	0.0276818	106608585	LOC106608585	echinoderm microtubule-associated protein-like 3
gene49842:106588407	359.123	0.79482	0.224752	0.000405569	0.0277784	106588407	LOC106588407	carboxy-terminal kinesin 2-like
gene38248:106577104	219.463	1.12581	0.318868	0.000414553	0.0283218	106577104	LOC106577104	VIP peptides-like
gene33815:106572662	31.5886	-1.55599	0.441237	0.000421219	0.0287046	106572662	LOC106572662	low-density lipoprotein receptor-related protein 1-like
gene29850:106568750	64.0455	-0.989394	0.280706	0.000424027	0.0288232	106568750	LOC106568750	tripartite motif-containing protein 7-like
gene25932:106565291	294.15	0.959775	0.272565	0.000429488	0.0290835	106565291	LOC106565291	ubiquitin-conjugating enzyme E2 C-like
gene28519:106567410	983.862	-0.700973	0.199087	0.000430013	0.0290835	106567410	LOC106567410	sarcoplasmic/endoplasmic reticulum calcium ATPase 1-like
gene13784:106607066	342.498	0.959699	0.273108	0.000441416	0.0295213	106607066	LOC106607066	importin subunit alpha-1-like
gene15772:106608874	68.5347	-1.17518	0.334438	0.00044158	0.0295213	106608874	LOC106608874	trichohyalin-like
gene21157:106560333	147.743	-0.831618	0.236625	0.000440577	0.0295213	106560333	LOC106560333	protein SZT2-like
gene4203:106582443	16.7433	-1.93884	0.551799	0.000441955	0.0295213	106582443	LOC106582443	uncharacterized LOC106582443
gene47408:100196305	456.925	-0.616739	0.175518	0.000441695	0.0295213	100196305	dal1b	Death-associated protein-like 1-B
gene35355:106574385	32.962	-1.32515	0.37735	0.00044522	0.029666	106574385	LOC106574385	uncharacterized LOC106574385
gene44787:100196701	424.903	0.880026	0.250648	0.000446427	0.0296731	100196701	tgm2	transglutaminase 2, C polypeptide
gene24858:106563991	621.037	-0.838482	0.23916	0.000454993	0.0300344	106563991	LOC106563991	actin-related protein 2/3 complex subunit 1B-like
gene45548:106584307	138.139	0.818135	0.233365	0.000455202	0.0300344	106584307	LOC106584307	protein ECT2-like
gene7830:106601456	43.9213	-1.51243	0.431334	0.000454229	0.0300344	106601456	LOC106601456	tumor necrosis factor ligand superfamily member 14-like
gene19313:106612296	26.4367	-1.34438	0.383713	0.000458997	0.0300946	106612296	LOC106612296	cationic amino acid transporter 2-like
gene23976:100380571	167.078	-1.00877	0.287946	0.00045946	0.0300946	100380571	npdc1	neural proliferation, differentiation and control, 1
gene34375:106573197	439.622	-0.689255	0.196677	0.000457467	0.0300946	106573197	LOC106573197	G1/S-specific cyclin-D2
gene12110:106605412	23.8097	-1.46046	0.417016	0.000461482	0.0301539	106605412	LOC106605412	C-C chemokine receptor type 5-like
gene42657:106581508	1394.19	0.435073	0.124458	0.000472733	0.0306983	106581508	LOC106581508	amine sulfotransferase-like
gene43709:106582541	286.619	-0.823401	0.235562	0.000473226	0.0306983	106582541	LOC106582541	fer-1-like protein 6
gene50897:106589387	6553.04	1.22389	0.350119	0.000472914	0.0306983	106589387	LOC106589387	actin, aortic smooth muscle
gene122:106603693	194.71	-0.672546	0.192525	0.000477116	0.0308025	106603693	LOC106603693	protein-tyrosine kinase 2-beta-like
gene23334:106562484	269.274	0.829491	0.237452	0.000477104	0.0308025	106562484	dut	deoxyuridine triphosphatase
gene14909:106608082	1398.91	0.818095	0.234597	0.000488032	0.0313572	106608082	LOC106608082	peptidyl-prolyl cis-trans isomerase FKBP3-like
gene33358:106572106	500.157	-0.936051	0.268403	0.000487588	0.0313572	106572106	LOC106572106	collagen alpha-1(XX) chain-like
gene43766:100194597	4557.51	0.86588	0.248548	0.000494429	0.0315429	100194597	ahcy	adenosylhomocysteinase
gene49874:106588385	112.354	0.992525	0.284877	0.000493881	0.0315429	106588385	LOC106588385	histone H3-like centromeric protein A
gene67:106594936	306.976	0.850508	0.244125	0.000494166	0.0315429	106594936	LOC106594936	nucleolar and spindle-associated protein 1-like
gene24721:106563870	56.037	-1.40776	0.404198	0.000496135	0.0315771	106563870	LOC106563870	C-type mannose receptor 2-like
gene18031:100195210	476.26	0.532953	0.153213	0.000504212	0.0319507	100195210	ampm1	Methionine aminopeptidase 1
gene23486:100195529	77.0551	1.0034	0.288464	0.000504372	0.0319507	100195529	prc1	regulator of cytokinesis 1
gene60836:106594355	57.5998	-1.06448	0.306255	0.000509375	0.0321254	106594355	enpp5	ectonucleotide pyrophosphatase/phosphodiesterase 5 (putative)
gene896:106603894	363.258	-0.912734	0.262604	0.000509512	0.0321254	106603894	LOC106603894	ribonuclease inhibitor-like
gene80720:106594658	60.3299	-1.03988	0.299357	0.00051328	0.0322876	106594658	LOC106594658	von Willebrand factor A domain-containing protein 5A-like
gene27688:106566589	81.8395	-0.917114	0.264159	0.000516929	0.0323743	106566589	lime1	Lck interacting transmembrane adaptor 1
gene78250:106595677	23.124	1.82967	0.527016	0.000517058	0.0323743	106595677	LOC106595677	kinesin-like protein KIF23
gene23509:106562651	28.5583	1.33884	0.385878	0.000521222	0.0323918	106562651	fah	fumarylacetoacetate hydrolase
gene34567:106573432	486.305	0.527219	0.151921	0.000519762	0.0323918	106573432	LOC106573432	calumenin-B
gene6204:106599039	472.196	-0.720121	0.207579	0.000522139	0.0323918	106599039	LOC106599039	solute carrier family 25 member 36-A-like
gene78438:106591948	21.3418	-1.5368	0.442846	0.000519912	0.0323918	106591948	LOC106591948	constitutive coactivator of PPAR-gamma-like protein 2
gene1779:106612385	197.4	-0.719207	0.207487	0.000527722	0.0325061	106612385	LOC106612385	suppressor of cytokine signaling 3-like
gene26331:106565440	43.8653	1.46751	0.423462	0.000529241	0.0325061	106565440	LOC106565440	plasticin-like
gene28304:106567171	320.527	0.90359	0.260746	0.000529448	0.0325061	106567171	racgap1	Rac GTPase activating protein 1
gene30520:106569423	93.9138	-1.04137	0.300529	0.000530004	0.0325061	106569423	LOC106569423	high affinity immunoglobulin epsilon receptor subunit gamma-like
gene8825:106602388	518.806	-0.526761	0.151914	0.000525323	0.0325061	106602388	LOC106602388	N-acetylgalactosaminyltransferase 7-like
gene2366:106564684	220.391	-0.576377	0.166398	0.000532523	0.0325128	106564684	LOC106564684	rab11 family-interacting protein 1-like
gene30734:106569628	813.273	0.654012	0.1888	0.000532122	0.0325128	106569628	LOC106569628	tropomyosin alpha-1 chain-like
gene5010:106590297	184.124	-0.730701	0.211019	0.00053474	0.0325745	106590297	LOC106590297	ras-related C3 botulinum toxin substrate 2-like
gene9869:106603334	151.776	-0.789996	0.228261	0.000538319	0.0327186	106603334	LOC106603334	plastin-3
gene35350:106574341	514.759	-0.655841	0.18954	0.000539819	0.0327361	106574341	LOC106574341	insulin receptor substrate 2-like
gene10188:106603639	109.131	-1.5358	0.444175	0.000544942	0.0328988	106603639	LOC106603639	zinc finger and BTB domain-containing protein 16-A
gene12474:106605821	120.081	0.949018	0.274474	0.000545035	0.0328988	106605821	isoc2	isochorismatase domain containing 2
gene65034:100306796	16.4913	-1.77279	0.512807	0.00054616	0.0328988	100306796	tmc7	Transmembrane channel-like protein 7
gene6172:106598970	264.339	-0.882345	0.255321	0.00054862	0.0329734	106598970	LOC106598970	plasmalemma vesicle-associated protein-like
rna133443	23.3991	-1.57272	0.4558	0.000559645	0.0335613	rna133443	NA	NA
gene27760:106566616	81.729	-0.927779	0.269012	0.000563011	0.0336883	106566616	LOC106566616	serine/threonine-protein kinase WNK2-like
gene9195:106602736	859.874	0.929293	0.269555	0.000565782	0.0337792	106602736	LOC106602736	synaptopodin-2-like
gene22566:100195962	173.964	-0.708925	0.205821	0.000572377	0.034025	100195962	cd82	CD82 antigen
gene26011:106565224	32.635	1.30161	0.377896	0.000572422	0.034025	106565224	LOC106565224	protein-glutamine gamma-glutamyltransferase 2-like
gene12303:106605606	213.467	-0.738646	0.214495	0.000573929	0.0340397	106605606	LOC106605606	maternal B9.15 protein-like
gene22006:106561174	158.687	-1.30874	0.380192	0.000576785	0.0340691	106561174	LOC106561174	ras-specific guanine nucleotide-releasing factor 1
gene45037:106583799	101.179	-0.935991	0.271915	0.00057695	0.0340691	106583799	LOC106583799	protein shisa-5-like
gene11711:106605073	47.6555	-1.19406	0.347073	0.000580943	0.0340934	106605073	LOC106605073	zinc finger protein 516-like
gene24543:106563682	68.6568	-1.03491	0.300822	0.000581151	0.0340934	106563682	LOC106563682	H(+)/Cl(-) exchange transporter 5-like
gene46318:100195547	248.827	-0.98359	0.285905	0.000581133	0.0340934	100195547	cd53	Leukocyte surface antigen CD53
gene48772:106587519	56.3858	-1.19502	0.347512	0.000584309	0.0342043	106587519	LOC106587519	tripartite motif-containing protein 66-like
gene10304:100195316	431.037	0.638924	0.186062	0.000594878	0.0345667	100195316	rcc1l	RCC1 like
gene14285:106607522	77.7927	-1.00698	0.293214	0.000594087	0.0345667	106607522	LOC106607522	interleukin-2 receptor subunit beta-like
gene29145:106567770	41.7088	-1.2761	0.371524	0.000593033	0.0345667	106567770	LOC106567770	neuronal PAS domain-containing protein 2-like
gene42333:106581119	1540.06	0.807411	0.23515	0.000595625	0.0345667	106581119	LOC106581119	non-histone chromosomal protein HMG-14-like
gene29649:106568573	39.7025	-1.18682	0.345803	0.000598998	0.0346879	106568573	LOC106568573	polypyrimidine tract-binding protein 3-like
gene80551:106594155	206.07	-0.672893	0.196175	0.000603445	0.0348706	106594155	LOC106594155	rho guanine nucleotide exchange factor 3-like
gene38203:100196122	397.394	0.867238	0.252896	0.000605299	0.034903	100196122	cdc2	Cell division control protein 2 homolog
gene47925:106586679	333.706	-0.73034	0.213054	0.000608145	0.0349923	106586679	sytl5	synaptotagmin like 5
gene25120:106564264	105.808	-1.09069	0.318587	0.000618152	0.0354162	106564264	LOC106564264	DENN domain-containing protein 1C-like
gene34037:106572891	154.337	-0.776124	0.226723	0.000618839	0.0354162	106572891	LOC106572891	clumping factor A-like
gene38753:100195271	275.916	-0.594415	0.173656	0.000619449	0.0354162	100195271	cenb1	Centaurin-beta-1
gene11916:106605277	303.512	-0.667763	0.195319	0.000628924	0.0356558	106605277	LOC106605277	G-protein-signaling modulator 2-like
gene19987:106613012	360.676	-0.890465	0.260425	0.000627866	0.0356558	106613012	LOC106613012	uncharacterized LOC106613012
gene38688:106577579	304.314	-0.90418	0.264365	0.00062575	0.0356558	106577579	LOC106577579	protein NLRC3-like
gene58897:106595603	142.143	0.991233	0.289839	0.000626345	0.0356558	106595603	LOC106595603	uncharacterized protein C18orf19 homolog B-like
gene52043:106590505	128.066	0.893501	0.261427	0.000631324	0.0357168	106590505	cip2a	cell proliferation regulating inhibitor of protein phosphatase 2A
gene23075:106562243	1339.26	0.500922	0.146601	0.000633397	0.0357591	106562243	LOC106562243	aspartate aminotransferase, mitochondrial-like
gene44490:106583349	308.375	0.761901	0.223086	0.000637146	0.0358957	106583349	LOC106583349	protein canopy homolog 2-like
gene2055:106561486	93.6504	-0.818912	0.239918	0.00064181	0.0360831	106561486	jak2	Janus kinase 2
gene104:100196112	110.768	0.82177	0.240979	0.000649319	0.0363538	100196112	cdkn3	cyclin dependent kinase inhibitor 3
gene28163:106567058	187.814	-0.680515	0.19955	0.00064903	0.0363538	106567058	LOC106567058	formin-like protein 3
gene46459:106585023	230.267	1.142	0.335154	0.000655871	0.0366446	106585023	LOC106585023	thrombospondin-4-B-like
gene6481:100194750	284.766	1.04974	0.308346	0.000663013	0.0369671	100194750	cdc20	cell division cycle 20
gene44508:106583333	42.4349	-1.12448	0.330418	0.000665976	0.0370557	106583333	LOC106583333	uncharacterized LOC106583333
gene1416:106608573	4282.57	0.390131	0.114669	0.000668377	0.0371128	106608573	LOC106608573	voltage-dependent anion-selective channel protein 2-like
gene16306:106609455	138.326	0.723023	0.212655	0.000673892	0.0373422	106609455	nup37	nucleoporin 37
gene29259:106568204	2625.67	-0.849696	0.250125	0.000681063	0.0375852	106568204	susd2	sushi domain containing 2
gene40770:100136543	277.867	-1.25477	0.369348	0.000680624	0.0375852	100136543	pck2	phosphoenolpyruvate carboxykinase 2 (mitochondrial)
gene18538:106611545	338.291	1.04909	0.309117	0.000689221	0.0379578	106611545	LOC106611545	cyclin-A2-like
gene43112:106581876	18.6347	-3.62813	1.07027	0.000699128	0.038425	106581876	LOC106581876	UDP-glucuronosyltransferase-like
gene19976:106613022	41.1676	-1.21792	0.359434	0.00070289	0.038475	106613022	LOC106613022	rho GTPase-activating protein 32-like
gene40765:100196000	812.893	0.630088	0.185933	0.000702008	0.038475	100196000	fen1	flap structure-specific endonuclease 1
gene13703:106606931	129.432	-0.778725	0.229967	0.00070857	0.0387074	106606931	LOC106606931	growth factor receptor-bound protein 2-like
gene12047:106605461	50.0621	1.06805	0.315615	0.00071433	0.0387865	106605461	LOC106605461	protein disulfide-isomerase A3-like
gene40819:106579708	17.3585	1.51686	0.448219	0.000713847	0.0387865	106579708	LOC106579708	uncharacterized LOC106579708
gene45474:106584223	68.4494	1.03229	0.304955	0.000711612	0.0387865	106584223	LOC106584223	complement C1q tumor necrosis factor-related protein 7-like
gene33401:106572285	89.6179	-0.871707	0.257929	0.000725831	0.039175	106572285	LOC106572285	tyrosine-protein phosphatase non-receptor type 18-like
gene33870:106572696	355.908	0.507511	0.150168	0.000725839	0.039175	106572696	LOC106572696	prostaglandin E synthase 3-like
gene77518:100329141	3128.41	-0.63471	0.187747	0.000723081	0.039175	100329141	b2m	beta-2-microglobulin
gene14048:106607352	48.3513	-1.00865	0.298608	0.000730572	0.0392734	106607352	LOC106607352	interleukin-21 receptor-like
gene49223:106588001	91.5986	-1.05928	0.313591	0.000730425	0.0392734	106588001	LOC106588001	Krueppel-like factor 13 pseudogene
gene44228:106583137	32.322	2.52574	0.748038	0.000734183	0.039389	106583137	LOC106583137	liprin-alpha-4-like
gene45632:106584369	185.112	-1.01278	0.300093	0.00073849	0.0395415	106584369	LOC106584369	tyrosine-protein kinase ZAP-70-like
gene2420:106565090	144.645	-0.857446	0.254186	0.000742709	0.0396886	106565090	LOC106565090	protein unc-13 homolog B-like
gene43522:100136430	1928.03	0.827963	0.245526	0.000745689	0.0397691	100136430	LOC100136430	60 kDa heat shock protein, mitochondrial
gene51165:106589612	179.356	0.916947	0.272018	0.000749219	0.0398785	106589612	LOC106589612	fatty acid synthase-like
gene28438:106567288	329.797	-0.708055	0.210145	0.000753422	0.0400233	106567288	LOC106567288	high mobility group protein HMG-I/HMG-Y-like
gene33719:106572567	164.418	1.50546	0.447195	0.000761406	0.040289	106572567	LOC106572567	zinc finger and BTB domain-containing protein 48-like
gene9567:106603038	117.971	0.916369	0.272206	0.000761409	0.040289	106603038	LOC106603038	kinesin-like protein KIF20A
gene35455:106574264	242.253	-0.655196	0.194847	0.000772078	0.0407736	106574264	LOC106574264	tyrosine-protein phosphatase non-receptor type 4-like
gene15590:100380461	76.0104	-1.08181	0.322053	0.000781947	0.0412141	100380461	ci150	CI150 protein
gene45982:106584704	124.316	0.927164	0.276061	0.000783547	0.0412179	106584704	LOC106584704	cysteine-rich motor neuron 1 protein-like
gene19738:106612559	337.564	-0.538566	0.160696	0.000803872	0.0420436	106612559	LOC106612559	sortilin-related receptor-like
gene21924:106560831	97.7898	-0.742786	0.221614	0.000803161	0.0420436	106560831	LOC106560831	arachidonate 15-lipoxygenase B-like
gene50513:106588945	286.4	-0.773574	0.230818	0.000803916	0.0420436	106588945	LOC106588945	HEPACAM family member 2-like
gene26657:106565846	237.252	-0.910029	0.271614	0.000806809	0.0421132	106565846	LOC106565846	solute carrier family 2, facilitated glucose transporter member 9-like
gene32453:106571332	19.9939	-1.9815	0.591539	0.000808877	0.0421397	106571332	LOC106571332	transcription regulator protein BACH2-like
gene24811:100196757	369.8	-1.04045	0.310682	0.000811308	0.0421849	100196757	c1qc	complement component 1, q subcomponent, C chain
gene33628:106572474	56.9427	1.19672	0.357566	0.000817397	0.0424197	106572474	LOC106572474	leiomodin-1-like
gene41764:106580612	52.3715	0.918074	0.274498	0.000824135	0.0426873	106580612	habp4	hyaluronan binding protein 4
gene29726:100380408	153.661	-0.614562	0.18387	0.000830644	0.04286	100380408	tmem71	transmembrane protein 71
gene9918:106603375	190.01	0.983325	0.294188	0.000830254	0.04286	106603375	ercc6l	ERCC excision repair 6 like, spindle assembly checkpoint helicase
gene50332:100380863	131.578	-0.776758	0.232591	0.00083904	0.0432106	100380863	LOC100380863	SLIT-ROBO Rho GTPase-activating protein 3
gene49746:106588497	100.522	1.03879	0.311192	0.000843524	0.0433588	106588497	LOC106588497	mediator of RNA polymerase II transcription subunit 30-like
gene11571:106604927	143.123	-1.14602	0.34366	0.000853814	0.0434445	106604927	LOC106604927	Down syndrome cell adhesion molecule-like
gene17989:100380676	96.6181	-0.753769	0.225926	0.000848843	0.0434445	100380676	LOC100380676	protein kinase C eta type
gene20667:100196494	752.201	1.27697	0.382667	0.000846802	0.0434445	100196494	gamt	guanidinoacetate N-methyltransferase
gene3751:106578046	43.592	-1.08871	0.326611	0.000858072	0.0434445	106578046	LOC106578046	intermediate conductance calcium-activated potassium channel protein 4-like
gene41205:106580001	2486.97	0.554181	0.166168	0.00085279	0.0434445	106580001	LOC106580001	tubulin beta-1 chain
gene43695:106582520	281.356	1.06541	0.319585	0.000856858	0.0434445	106582520	LOC106582520	motor neuron and pancreas homeobox protein 1-like
gene44731:100136450	116.818	-1.22704	0.368018	0.000855518	0.0434445	100136450	LOC100136450	CD8 alpha
gene48382:106587145	77.4615	-1.16052	0.348071	0.000855601	0.0434445	106587145	LOC106587145	receptor-interacting serine/threonine-protein kinase 2-like
gene4719:106587486	38.9741	2.47461	0.742536	0.000860263	0.0434488	106587486	LOC106587486	actin, alpha skeletal muscle 2-like
gene9130:106602697	140.131	-1.13065	0.339301	0.000861377	0.0434488	106602697	LOC106602697	SLAM family member 5-like
gene8772:106602330	123.063	0.927963	0.278627	0.000866957	0.0436487	106602330	LOC106602330	uncharacterized LOC106602330
gene3031:106571564	6812.03	0.944404	0.283638	0.000869665	0.0436927	106571564	LOC106571564	tropomyosin beta chain
gene33733:106572634	775.769	-0.916841	0.275397	0.00087107	0.0436927	106572634	LOC106572634	fibrous sheath CABYR-binding protein-like
gene33209:106572230	233.429	0.881685	0.264905	0.000873767	0.0437455	106572230	LOC106572230	targeting protein for Xklp2-A-like
gene38211:106577137	495.558	0.832838	0.250267	0.000875364	0.0437455	106577137	LOC106577137	kinesin-like protein KIF11-B
gene23896:106563110	21.1668	-1.51738	0.456191	0.000880382	0.0438658	106563110	LOC106563110	caspase-3-like
gene32483:106571314	1569.66	-0.590495	0.177576	0.000883189	0.0438658	106571314	LOC106571314	monocarboxylate transporter 10-like
gene47353:100306785	497.011	-0.800319	0.2407	0.000884273	0.0438658	100306785	itb2	Integrin beta-2
gene6403:100217346	49.02	-1.2007	0.361081	0.000883242	0.0438658	100217346	klf4	Kruppel-like factor 4
gene18306:106611361	522.968	-0.563718	0.169637	0.000890266	0.0440821	106611361	LOC106611361	cell growth regulator with EF hand domain protein 1-like
gene49610:106588166	42.4062	-1.51898	0.457281	0.000894487	0.0442099	106588166	LOC106588166	tuftelin-like
gene42791:100195393	87.6466	-0.920113	0.277156	0.000900714	0.0444363	100195393	gpr18	G protein-coupled receptor 18
gene44845:106583657	106.234	-0.805303	0.242649	0.000904072	0.0445206	106583657	LOC106583657	TOX high mobility group box family member 2-like
gene32206:106571057	28.4696	-2.23003	0.672363	0.000910839	0.0447721	106571057	LOC106571057	interleukin-17F-like
gene23154:106562311	49.3968	1.16352	0.351073	0.000919146	0.0450983	106562311	LOC106562311	tryptophan 5-hydroxylase 1-like
gene43312:106582060	141.918	-1.00377	0.303068	0.000926215	0.0453627	106582060	LOC106582060	macrophage receptor MARCO-like
gene2812:106569503	74.7806	-0.848199	0.256271	0.00093372	0.0456465	106569503	LOC106569503	electrogenic sodium bicarbonate cotransporter 1-like
gene29377:106568292	298.09	0.667444	0.20172	0.000937084	0.0456465	106568292	LOC106568292	density-regulated protein-like
gene47600:106586370	859.499	0.623804	0.188518	0.000936329	0.0456465	106586370	LOC106586370	MOB-like protein phocein
gene32667:106571471	356.495	0.769827	0.232781	0.000942732	0.0458024	106571471	knl1	kinetochore scaffold 1
gene48827:106587590	315.337	-0.4745	0.143492	0.00094368	0.0458024	106587590	LOC106587590	retinoblastoma-like protein 2
gene25623:106564996	65.6643	-0.898695	0.271893	0.000948655	0.0459364	106564996	LOC106564996	C-C chemokine receptor type 7-like
gene48691:106587456	135.998	0.920386	0.278485	0.000949845	0.0459364	106587456	cmc2	C-X9-C motif containing 2
gene49839:106588409	591.674	0.664495	0.201139	0.000954296	0.0460691	106588409	LOC106588409	tubulin beta chain
gene48577:106587338	155.341	0.974964	0.295179	0.000956715	0.0461034	106587338	ccnb2	cyclin B2
gene15599:106608779	234.363	-0.861713	0.260949	0.00095921	0.0461412	106608779	LOC106608779	arf-GAP with coiled-coil, ANK repeat and PH domain-containing protein 1-like
gene14438:106607664	435.017	0.995824	0.302027	0.000976759	0.0466069	106607664	rrm2	ribonucleotide reductase regulatory subunit M2
gene15951:106609043	90.7423	1.06022	0.32172	0.000982596	0.0466069	106609043	LOC106609043	DEP domain-containing protein 7-like
gene17741:106610794	145.386	-0.960439	0.291172	0.000971921	0.0466069	106610794	LOC106610794	serine/threonine-protein kinase D3-like
gene34668:106573503	7139.59	0.885472	0.268571	0.000977327	0.0466069	106573503	LOC106573503	tropomyosin alpha-1 chain-like
gene48690:100195990	72.8733	0.975459	0.295966	0.000981244	0.0466069	100195990	cenpn	centromere protein N
gene51380:100196053	734.277	-0.508308	0.154259	0.000983673	0.0466069	100196053	srgn	serglycin
gene54298:106592607	90.0764	-1.37135	0.416199	0.000984434	0.0466069	106592607	hacl1	2-hydroxyacyl-CoA lyase 1
gene5779:106597311	89.9371	-0.932847	0.282833	0.000972989	0.0466069	106597311	LOC106597311	C-C chemokine receptor type 9-like
gene9202:106602729	36.2649	-1.18465	0.359339	0.000978124	0.0466069	106602729	LOC106602729	NXPE family member 3-like
gene5233:106592028	121.352	-0.730737	0.221909	0.000991395	0.0467723	106592028	LOC106592028	synaptogyrin-2-like
gene9398:106602849	1013.14	-0.963944	0.292723	0.000991143	0.0467723	106602849	LOC106602849	solute carrier family 13 member 2-like
gene30525:106569375	152.723	0.964438	0.292997	0.000996067	0.0469108	106569375	LOC106569375	myeloid-associated differentiation marker homolog
gene26799:106565712	2180.88	0.846741	0.257382	0.00100251	0.0471319	106565712	LOC106565712	prothymosin alpha-like
gene15641:100380692	280.379	-0.600995	0.182846	0.00101302	0.0474607	100380692	dock11	dedicator of cytokinesis 11
gene18063:106611122	255.295	-0.58998	0.179493	0.00101289	0.0474607	106611122	LOC106611122	protein LBH-like
gene17844:106610908	46.8067	-1.43059	0.435494	0.00101991	0.0477007	106610908	LOC106610908	probable G-protein coupled receptor 97
gene31262:106569884	469.53	0.648824	0.197615	0.0010261	0.0479071	106569884	LOC106569884	interleukin enhancer-binding factor 2 homolog
gene10487:106603933	41.9046	-0.991533	0.30215	0.00103224	0.0479547	106603933	atp2a3	ATPase sarcoplasmic/endoplasmic reticulum Ca2+ transporting 3
gene15099:106608280	43.5974	1.04709	0.319086	0.00103245	0.0479547	106608280	LOC106608280	signal-induced proliferation-associated 1-like protein 1
gene28236:106567114	50.165	-1.00604	0.306511	0.00102986	0.0479547	106567114	LOC106567114	nuclear factor of activated T-cells, cytoplasmic 2-like
gene4314:106583386	329.601	0.717612	0.21878	0.00103783	0.0481216	106583386	LOC106583386	cell division cycle-associated protein 3-like
gene24328:106563465	1711.05	0.436359	0.133097	0.00104355	0.048304	106563465	ganab	glucosidase II alpha subunit
gene16296:100195840	63.1583	-1.29869	0.396468	0.00105421	0.0485716	100195840	spic	Spi-C transcription factor (Spi-1/PU.1 related)
gene21626:106561094	7836.65	0.53633	0.163734	0.00105432	0.0485716	106561094	LOC106561094	creatine kinase U-type, mitochondrial-like
gene22073:100380815	556.491	0.642997	0.196319	0.00105561	0.0485716	100380815	sephs1	selenophosphate synthetase 1
gene41827:106580699	42.1215	-1.25802	0.384126	0.00105653	0.0485716	106580699	LOC106580699	anoctamin-7-like
gene22442:106561604	210.285	0.93824	0.286569	0.00106018	0.0486565	106561604	LOC106561604	aurora kinase B-like
gene36146:100196670	401.53	0.783772	0.239437	0.00106265	0.0486872	100196670	atp5g3	ATP synthase, H+ transporting, mitochondrial Fo complex subunit C3 (subunit 9)
gene20954:106613902	198.77	0.755926	0.231304	0.00108271	0.049522	106613902	LOC106613902	calreticulin-like
gene4335:106583523	115.369	-0.684855	0.209633	0.00108725	0.0496454	106583523	LOC106583523	zinc finger protein 516-like
gene28077:106566973	1873.52	1.02533	0.314462	0.00111186	0.0506837	106566973	LOC106566973	keratin, type II cytoskeletal 8-like
gene48530:106587200	37.8031	2.44391	0.749864	0.0011175	0.0508547	106587200	LOC106587200	polypeptide N-acetylgalactosaminyltransferase 18
gene11130:106604450	42.9141	1.25577	0.385788	0.00113359	0.0513272	106604450	LOC106604450	tenomodulin-like
gene15634:106608750	20.5856	-1.61992	0.497575	0.00113139	0.0513272	106608750	LOC106608750	nectin-4-like
gene42527:106581383	497.482	-0.806034	0.247622	0.00113355	0.0513272	106581383	LOC106581383	protein sel-1 homolog 3-like
gene13700:106606929	84.1756	-0.863875	0.265626	0.00114507	0.0517601	106606929	LOC106606929	cytohesin-1-like
gene46064:106584796	672.374	-2.54012	0.781194	0.00114762	0.0517887	106584796	LOC106584796	mucin-2-like
gene59243:106590995	67.0646	1.12656	0.346627	0.00115379	0.0519801	106590995	LOC106590995	pachytene checkpoint protein 2 homolog
gene8411:106602047	1034.55	0.545439	0.167875	0.00115779	0.0520735	106602047	LOC106602047	ATP synthase subunit d, mitochondrial-like
gene20594:106613585	38.6006	-1.17558	0.362352	0.00117734	0.052777	106613585	LOC106613585	roquin-1-like
gene28131:106567028	64.4475	1.00917	0.311051	0.00117705	0.052777	106567028	LOC106567028	neural cell adhesion molecule L1-like
gene25626:106564952	175.588	-0.740183	0.228213	0.00118117	0.052861	106564952	LOC106564952	zinc finger protein Aiolos-like
gene2353:106564550	237.07	-0.629459	0.194121	0.00118441	0.0529181	106564550	rhof	ras homolog family member F, filopodia associated
gene34709:106573754	1728.1	0.821827	0.253535	0.00118917	0.0529912	106573754	LOC106573754	calretinin-like
gene46106:106584836	30.6643	1.43429	0.442509	0.00118998	0.0529912	106584836	LOC106584836	immunoglobulin superfamily containing leucine-rich repeat protein 2-like
gene37263:106576169	416.414	0.576795	0.178078	0.00119949	0.0532669	106576169	LOC106576169	lipase maturation factor 2-like
gene42034:106580870	51.4922	-1.26328	0.39004	0.00120011	0.0532669	106580870	LOC106580870	leucine-rich repeat-containing protein 15-like
gene32379:106571219	210.625	-0.72287	0.223333	0.00120901	0.0535738	106571219	nfkbie	NFKB inhibitor epsilon
gene13918:100194731	383.867	0.824753	0.254917	0.00121479	0.0537417	100194731	LOC100194731	primary amine oxidase, liver isozyme
gene40513:106579399	104.856	0.988694	0.305666	0.00121833	0.0537477	106579399	kif22	kinesin family member 22
gene68485:106592338	1241.29	-0.864265	0.267209	0.00121891	0.0537477	106592338	LOC106592338	uncharacterized LOC106592338
gene20367:106613355	40.2179	1.1275	0.348933	0.00123234	0.0542511	106613355	LOC106613355	protein-tyrosine sulfotransferase 1-like
gene47604:106586375	224.673	-0.613637	0.190011	0.00124015	0.0543977	106586375	LOC106586375	serine/threonine-protein phosphatase 6 regulatory ankyrin repeat subunit B-like
gene49280:106588058	393.58	0.618403	0.191508	0.00124172	0.0543977	106588058	mrps11	mitochondrial ribosomal protein S11
gene67012:106591811	22.7957	-1.65082	0.511131	0.00123908	0.0543977	106591811	LOC106591811	intestinal mucin-like protein
gene4778:106586974	3765.23	0.793577	0.2458	0.0012442	0.0544183	106586974	LOC106586974	40S ribosomal protein SA
gene19536:100195422	1155.95	0.688635	0.213437	0.00125355	0.0544868	100195422	tisb	Butyrate response factor 1
gene20542:106613538	50.6461	1.51857	0.470481	0.00124789	0.0544868	106613538	LOC106613538	acyl-coenzyme A thioesterase 11-like
gene41679:106580588	23.5783	1.26049	0.390689	0.00125385	0.0544868	106580588	cssa20h5orf34	chromosome ssa20 open reading frame, human C5orf34
gene44777:106583587	92.4094	0.924263	0.286458	0.00125305	0.0544868	106583587	LOC106583587	rac GTPase-activating protein 1-like
gene40068:106578961	8095	1.16397	0.361137	0.00126824	0.0550235	106578961	LOC106578961	actin, aortic smooth muscle
gene24545:106563680	40.6034	1.28816	0.399778	0.00127216	0.055105	106563680	LOC106563680	G2/mitotic-specific cyclin-B3-like
gene34508:106573368	130.255	0.635624	0.197364	0.00127937	0.0553286	106573368	rad52	RAD52 homolog, DNA repair protein
gene24118:106563243	192.921	0.881063	0.273645	0.0012831	0.0554013	106563243	LOC106563243	myosin-IIIb-like
gene42424:106581244	151.619	-0.77679	0.241615	0.00130446	0.0562333	106581244	LOC106581244	uncharacterized LOC106581244
gene4085:100196462	1736.99	-0.938242	0.29264	0.00134535	0.0577946	100196462	cats	Cathepsin S
gene51075:106589546	228.075	0.582112	0.181584	0.0013471	0.0577946	106589546	LOC106589546	mitochondrial import receptor subunit TOM22 homolog
gene53920:106592455	304.998	1.0746	0.335175	0.00134549	0.0577946	106592455	plk1	polo like kinase 1
gene75497:106594319	1314.16	0.63952	0.199532	0.00135019	0.0578353	106594319	LOC106594319	non-histone chromosomal protein HMG-14A pseudogene
gene26843:100196476	94.3684	1.01619	0.317182	0.00135625	0.058003	100196476	apitd1	apoptosis-inducing, TAF9-like domain 1
gene37790:106576895	542.473	-0.728761	0.227579	0.00136365	0.0582269	106576895	vsir	V-set immunoregulatory receptor
gene48637:106587404	475.043	0.606445	0.189518	0.00137457	0.0586006	106587404	LOC106587404	aspartate aminotransferase, mitochondrial-like
gene1342:106607864	265.033	0.752197	0.23533	0.00139179	0.0589824	106607864	LOC106607864	kinesin-like protein KIF11
gene14532:100196210	209.36	0.655915	0.205272	0.00139664	0.0589824	100196210	ppil4	peptidylprolyl isomerase like 4
gene15443:106608552	891.111	-0.794941	0.248688	0.00139089	0.0589824	106608552	s100p	S100 calcium binding protein P
gene1546:106610005	249.896	0.992843	0.31064	0.00139289	0.0589824	106610005	birc5	baculoviral IAP repeat containing 5
gene17260:106610355	140.969	0.749463	0.234462	0.00139098	0.0589824	106610355	LOC106610355	inorganic pyrophosphatase-like
gene28585:106567488	180.974	-0.753446	0.235766	0.00139473	0.0589824	106567488	LOC106567488	cornifelin homolog A-like
gene1678:106613187	108.51	-0.900984	0.282114	0.00140471	0.0592303	106613187	LOC106613187	arachidonate 5-lipoxygenase-like
gene20019:106612990	1064.82	0.739624	0.232031	0.00143455	0.0595581	106612990	LOC106612990	high mobility group nucleosome-binding domain-containing protein 3-like
gene27216:106566166	196.964	-0.838386	0.262933	0.00142967	0.0595581	106566166	LOC106566166	nck-associated protein 1-like
gene32258:106571106	88.9062	-0.926275	0.290353	0.00142189	0.0595581	106571106	LOC106571106	B-cell lymphoma/leukemia 11B-like
gene33265:106572187	105.009	-0.872561	0.273693	0.00143212	0.0595581	106572187	LOC106572187	tyrosine-protein phosphatase non-receptor type 11-like
gene37304:106576202	1518.48	0.445858	0.139854	0.00143249	0.0595581	106576202	LOC106576202	ATP synthase subunit gamma, mitochondrial-like
gene3742:106578103	119.019	-0.682248	0.21401	0.00143297	0.0595581	106578103	LOC106578103	uncharacterized LOC106578103
gene37853:106576835	230.129	0.678022	0.212513	0.00142026	0.0595581	106576835	LOC106576835	cytochrome c oxidase subunit 5B, mitochondrial-like
gene45289:100194948	32.8149	1.06886	0.335307	0.00143409	0.0595581	100194948	cef10	CEF-10
gene47880:106586641	22.553	-1.73454	0.543631	0.00141952	0.0595581	106586641	LOC106586641	uncharacterized LOC106586641
gene64406:106592197	18.295	-1.57333	0.492975	0.0014154	0.0595581	106592197	LOC106592197	adapter protein CIKS-like
gene20691:106613669	86.1815	-0.833495	0.26173	0.00144974	0.0600675	106613669	LOC106613669	ceramide synthase 1-like
gene23001:106562090	599.462	0.603326	0.189472	0.00145127	0.0600675	106562090	LOC106562090	glycine cleavage system H protein, mitochondrial-like
gene48548:106587185	188.199	-0.777748	0.24429	0.00145402	0.0600893	106587185	LOC106587185	nuclear factor of activated T-cells 5-like
gene11677:106605028	56.1468	1.04488	0.328443	0.00146607	0.060402	106605028	LOC106605028	glial fibrillary acidic protein-like
gene48918:106587685	450.992	0.566592	0.178076	0.00146392	0.060402	106587685	LOC106587685	biogenesis of lysosome-related organelles complex 1 subunit 6-like
gene19810:100196030	25.6772	1.3862	0.435873	0.00147128	0.0604321	100196030	dus14	Dual specificity protein phosphatase 14
gene4732:106587400	157.755	-0.762253	0.239674	0.00147085	0.0604321	106587400	LOC106587400	lysozyme G-like
gene16683:106609768	90.5617	1.72784	0.543515	0.0014778	0.060478	106609768	LOC106609768	cytidine monophosphate-N-acetylneuraminic acid hydroxylase-like
gene27922:106566870	3025.54	-0.400309	0.125918	0.00147718	0.060478	106566870	LOC106566870	rho guanine nucleotide exchange factor 19-like
gene39126:106578037	45.6238	-1.42121	0.447145	0.00148087	0.060478	106578037	LOC106578037	CD209 antigen-like protein A
gene61035:106593674	242.017	0.520354	0.16372	0.00148136	0.060478	106593674	rtcb	RNA 2',3'-cyclic phosphate and 5'-OH ligase
gene16317:106609467	298.157	-0.720842	0.227052	0.00149945	0.0611243	106609467	LOC106609467	tetraspanin-9-like
gene27970:100526661	47.8713	-1.00656	0.317259	0.00151044	0.0612024	100526661	foxp3	forkhead box P3
gene37448:106576352	104.207	0.876759	0.276272	0.00150593	0.0612024	106576352	orc5	origin recognition complex subunit 5
gene42179:106581034	87.6319	-0.921878	0.290523	0.00150788	0.0612024	106581034	LOC106581034	protein unc-119 homolog A-like
gene7065:106600711	175.691	-0.764244	0.240864	0.00150908	0.0612024	106600711	LOC106600711	uncharacterized LOC106600711
gene15483:106608593	393.083	0.537688	0.169512	0.00151408	0.0612295	106608593	LOC106608593	RNA-binding protein 4.1-like
gene7055:106600700	93.7797	-1.13455	0.357712	0.00151565	0.0612295	106600700	LOC106600700	transient receptor potential cation channel subfamily M member 4-like
gene50616:106589046	820.384	1.14209	0.361015	0.00155859	0.0628701	106589046	LOC106589046	uncharacterized protein C6orf47-like
gene18792:106611716	161.504	0.72435	0.2291	0.00156837	0.0631703	106611716	LOC106611716	centromere protein I-like
gene9599:106603064	450.638	0.590144	0.186729	0.00157537	0.0633575	106603064	LOC106603064	pyruvate dehydrogenase E1 component subunit alpha, mitochondrial-like
gene2448:106565434	72.1769	-0.877475	0.277799	0.0015849	0.0636459	106565434	LOC106565434	erythrocyte band 7 integral membrane protein-like
gene43987:106582829	1495.67	0.933779	0.29576	0.00159285	0.0636809	106582829	LOC106582829	parathymosin-like
gene44213:106582960	381.562	0.660091	0.209038	0.00158985	0.0636809	106582960	LOC106582960	mRNA turnover protein 4 homolog
gene9544:106602979	145.718	-0.768702	0.243466	0.00159221	0.0636809	106602979	LOC106602979	phosphofurin acidic cluster sorting protein 1-like
gene43700:106582530	28.4305	-1.20613	0.382197	0.00160062	0.063897	106582530	LOC106582530	collagen alpha-5(IV) chain pseudogene
gene37549:106576454	238.225	0.83629	0.265146	0.0016101	0.0640857	106576454	LOC106576454	lumican-like
gene45845:106584568	102.625	0.683075	0.216552	0.00160868	0.0640857	106584568	LOC106584568	bile acid-CoA:amino acid N-acyltransferase-like
gene21000:100306791	117.546	-1.2884	0.409267	0.00164356	0.0653214	100306791	i12r2	Interleukin-12 receptor beta-2 chain
gene9709:106603154	1329.39	0.482857	0.153494	0.00165647	0.0657374	106603154	LOC106603154	peptidyl-prolyl cis-trans isomerase FKBP2-like
gene4843:106588790	338.174	-0.61528	0.195718	0.00166824	0.0661072	106588790	LOC106588790	cytosolic purine 5'-nucleotidase-like
gene31355:106570223	209.716	0.738443	0.235231	0.00169399	0.0669312	106570223	LOC106570223	uncharacterized aarF domain-containing protein kinase 5-like
gene6733:106600124	121.681	1.53719	0.489667	0.00169383	0.0669312	106600124	LOC106600124	ephrin type-A receptor 3-like
gene14110:106607301	395.066	-0.879478	0.280241	0.00169934	0.067029	106607301	LOC106607301	serine/threonine-protein kinase 17A-like
gene41340:106579876	548.576	0.798472	0.254458	0.00170143	0.067029	106579876	cenpe	centromere protein E
gene15739:106608861	122.964	0.937581	0.298905	0.00170848	0.0672084	106608861	LOC106608861	prostaglandin reductase 1-like
gene18905:106611883	36.3336	-1.46944	0.468684	0.00171715	0.0672471	106611883	LOC106611883	uncharacterized LOC106611883
gene24571:106563746	111.575	-0.778721	0.248375	0.00171698	0.0672471	106563746	LOC106563746	arf-GAP with Rho-GAP domain, ANK repeat and PH domain-containing protein 1-like
gene44658:106583483	349.203	-0.549264	0.175236	0.00172192	0.0672471	106583483	LOC106583483	choline/ethanolaminephosphotransferase 1-like
gene5281:106592441	17.0286	-1.82178	0.581192	0.00172119	0.0672471	106592441	LOC106592441	Fc receptor-like protein 5
gene6059:100196282	40.7024	-1.21462	0.3874	0.00171676	0.0672471	100196282	rgs18	regulator of G-protein signaling 18
gene18468:100306724	196.997	0.862403	0.27526	0.00173	0.067465	100306724	pttg1	pituitary tumor-transforming 1
gene21125:100195039	420.644	0.662166	0.211489	0.00174233	0.0676692	100195039	uchl5	ubiquitin carboxyl-terminal hydrolase L5
gene22414:100306828	135.01	-0.708478	0.226286	0.00174276	0.0676692	100306828	dus6	Dual specificity protein phosphatase 6
gene35477:106574241	6013.61	0.975523	0.311566	0.00174196	0.0676692	106574241	LOC106574241	desmin-like
gene38740:106577620	33.6328	1.23155	0.393475	0.0017484	0.0677907	106577620	LOC106577620	uncharacterized LOC106577620
gene15927:106609015	95.4998	-0.787919	0.251882	0.00175927	0.0680166	106609015	LOC106609015	uncharacterized LOC106609015
gene4706:106587585	303.911	0.631973	0.202024	0.00175877	0.0680166	106587585	LOC106587585	39S ribosomal protein L4, mitochondrial-like
gene29061:106567840	108.037	1.11374	0.356104	0.00176264	0.0680211	106567840	LOC106567840	unconventional myosin-Ic-like
gene41980:106580821	4721.86	0.908922	0.290645	0.00176442	0.0680211	106580821	LOC106580821	transgelin-like
gene1475:106609444	32.4906	-1.15467	0.369546	0.00178068	0.0680642	106609444	LOC106609444	SH3 domain-binding protein 1-like
gene23786:106562939	320.989	-0.884155	0.282835	0.00177173	0.0680642	106562939	LOC106562939	transportin-1
gene34994:106573858	53.1006	-1.00335	0.321054	0.00177694	0.0680642	106573858	LOC106573858	uncharacterized LOC106573858
gene3544:106575920	902.22	0.645124	0.206465	0.00178039	0.0680642	106575920	ncapd2	non-SMC condensin I complex subunit D2
gene47939:106586692	672.205	-0.499724	0.15993	0.00178023	0.0680642	106586692	LOC106586692	serine/threonine-protein kinase SIK2-like
gene80308:106593543	49.1642	-1.23431	0.394951	0.00177662	0.0680642	106593543	LOC106593543	proto-oncogene vav-like
gene47200:106585953	29.2397	-1.31792	0.42197	0.00178867	0.068273	106585953	LOC106585953	WD repeat and FYVE domain-containing protein 3-like
gene10604:106604037	56.1605	-0.843016	0.270035	0.00179705	0.0684961	106604037	LOC106604037	dedicator of cytokinesis protein 2-like
gene17857:106610834	549.004	0.681387	0.218536	0.00182108	0.069314	106610834	LOC106610834	thrombospondin-1-like
gene40260:100380718	1729.44	0.624191	0.200309	0.00183235	0.0694859	100380718	top2a	DNA topoisomerase II alpha
gene44227:106583138	362.633	0.59822	0.191955	0.0018304	0.0694859	106583138	tmem183a	transmembrane protein 183A
gene48536:106587194	184.725	0.666153	0.213786	0.00183332	0.0694859	106587194	LOC106587194	alpha-parvin
gene34130:106572985	37.2112	-1.11751	0.358739	0.00183875	0.069594	106572985	LOC106572985	uncharacterized LOC106572985
gene27709:106566662	113.066	1.08918	0.350192	0.00186929	0.0706509	106566662	LOC106566662	sarcolemmal membrane-associated protein-like
gene43876:106582712	966.183	0.878483	0.28249	0.00187224	0.0706633	106582712	LOC106582712	cysteine and glycine-rich protein 1-like
gene11948:106605311	1931.48	0.562996	0.18131	0.00190178	0.0716781	106605311	LOC106605311	lamin-A-like
gene44263:100195126	1425.48	0.623432	0.200832	0.00190766	0.0717992	100195126	nucks1	nuclear casein kinase and cyclin dependent kinase substrate 1
gene15559:106608632	298.79	0.817371	0.263417	0.00191599	0.0719865	106608632	LOC106608632	histone H2A.Z
gene3054:106571878	20.1357	-1.52885	0.492755	0.00191797	0.0719865	106571878	LOC106571878	NACHT, LRR and PYD domains-containing protein 12-like
gene23550:106562699	50.3206	0.988555	0.318724	0.00192476	0.0720411	106562699	LOC106562699	kinesin-like protein KIF23
gene42916:106581833	723.324	-0.750846	0.242066	0.00192337	0.0720411	106581833	LOC106581833	protein FEV
gene43687:106582518	357.103	-0.614635	0.198262	0.00193452	0.0723027	106582518	itgav	integrin subunit alpha V
gene7567:100136380	199.802	-0.896311	0.28916	0.00193711	0.0723027	100136380	cd9	CD9 molecule
gene47169:106585921	199.973	-0.641297	0.206933	0.00194136	0.0723612	106585921	LOC106585921	nipped-B-like protein A
gene25405:106564551	41.9156	-0.99434	0.320923	0.00194587	0.0724292	106564551	micall1	MICAL like 1
gene13736:106606963	23.3688	-1.3959	0.450678	0.00195263	0.0724809	106606963	LOC106606963	UBA-like domain-containing protein 2
gene21762:106560984	127.907	-0.683081	0.220523	0.00195125	0.0724809	106560984	LOC106560984	SRSF protein kinase 2-like
gene15214:106608396	222.207	-0.976149	0.315281	0.00196066	0.072679	106608396	LOC106608396	profilin-2 pseudogene
gene2421:100196714	283.663	0.661825	0.213852	0.00196961	0.0729107	100196714	stml2	Stomatin-like protein 2
gene49684:100194709	570.755	-0.786761	0.254262	0.00197282	0.0729296	100194709	LOC100194709	plectin
gene45280:100286464	653.822	-0.694779	0.224714	0.00198918	0.0734336	100286464	rel3	Relaxin-3
gene30536:106569421	25.7133	-1.67618	0.542401	0.0019995	0.0737138	106569421	LOC106569421	putative ferric-chelate reductase 1
gene35064:106573923	77.2666	1.20055	0.388636	0.00200729	0.0739	106573923	LOC106573923	lipid phosphate phosphatase-related protein type 3-like
gene39980:106578873	2008.06	0.720291	0.233224	0.00201235	0.0739853	106578873	LOC106578873	histone H3.3
gene1059:106604619	60.1599	-0.930998	0.301532	0.00201808	0.074095	106604619	LOC106604619	phosphoinositide 3-kinase adapter protein 1-like
gene25327:106564474	70.0694	1.12892	0.365807	0.0020279	0.0743544	106564474	LOC106564474	ribonuclease H2 subunit A-like
gene32199:100195151	687.166	0.736451	0.238755	0.00203858	0.0745451	100195151	mcm3	minichromosome maintenance complex component 3
gene41700:106580568	3956.07	0.513049	0.166329	0.00203862	0.0745451	106580568	LOC106580568	ATP synthase subunit alpha, mitochondrial-like
gene10011:100194939	236.397	0.741908	0.240619	0.00204701	0.0747362	100194939	serph	Serpin H1
gene4088:106580807	27.4963	1.32416	0.429506	0.00204939	0.0747362	106580807	LOC106580807	semaphorin-7A-like
gene17064:106610160	42.1208	-1.09716	0.356182	0.00206778	0.0752487	106610160	atrn	attractin
gene62450:100169857	54.8415	-1.52564	0.495315	0.00206902	0.0752487	100169857	LOC100169857	uncharacterized LOC100169857
gene22508:106561666	214.031	0.908587	0.295234	0.00208731	0.0755068	106561666	LOC106561666	neuroepithelial cell-transforming gene 1 protein-like
gene41748:106580564	48.7831	-1.00422	0.326298	0.00208675	0.0755068	106580564	LOC106580564	zinc finger protein 366-like
gene4755:106587157	238.284	-0.63149	0.205148	0.00208248	0.0755068	106587157	LOC106587157	septin-9-like
gene50984:106589236	143.25	-0.802853	0.260789	0.00208003	0.0755068	106589236	LOC106589236	uncharacterized LOC106589236
gene18289:106611346	82.6486	-0.967363	0.314398	0.00209186	0.0755702	106611346	LOC106611346	adhesion G-protein coupled receptor F1-like
gene20823:106613791	61.8415	0.871171	0.283384	0.00211086	0.0758561	106613791	LOC106613791	cyclin-dependent kinases regulatory subunit 1-like
gene40976:106580191	57.4219	-1.09064	0.354739	0.00210856	0.0758561	106580191	LOC106580191	ras and EF-hand domain-containing protein homolog
gene50365:106588796	202.777	0.622928	0.202634	0.00211102	0.0758561	106588796	LOC106588796	cell division cycle-associated 7-like protein
gene61382:100136465	141.296	0.657023	0.213677	0.00210615	0.0758561	100136465	pkz	protein kinase containing Z-DNA binding domains
gene22044:106561216	408.166	0.500459	0.162875	0.00212164	0.0760619	106561216	LOC106561216	glycine cleavage system H protein, mitochondrial-like
gene5371:106593332	34.5707	-1.35981	0.442568	0.00212238	0.0760619	106593332	LOC106593332	cytochrome P450 3A27-like
gene67000:100380294	81.8835	1.05459	0.343275	0.00212527	0.0760643	100380294	cnd3	Condensin complex subunit 3
gene34878:106573596	27.5857	1.69915	0.553322	0.00213474	0.0763022	106573596	LOC106573596	cartilage intermediate layer protein 1-like
gene12062:106605450	382.353	0.791053	0.257673	0.00214071	0.0764142	106605450	LOC106605450	ras GTPase-activating-like protein IQGAP3
gene10373:106603825	292.312	-0.496169	0.161725	0.00215508	0.0767516	106603825	LOC106603825	rap guanine nucleotide exchange factor 6-like
gene44543:106583573	189.233	0.568693	0.18537	0.00215585	0.0767516	106583573	r3hcc1	R3H domain and coiled-coil containing 1
gene16457:106609569	386.801	-0.652519	0.212996	0.00218749	0.0771401	106609569	LOC106609569	protein BTG1-like
gene26765:106565741	197.223	0.673576	0.219759	0.00217619	0.0771401	106565741	LOC106565741	uncharacterized LOC106565741
gene31337:106570212	649.111	-0.681564	0.222493	0.00218908	0.0771401	106570212	LOC106570212	alpha-N-acetylgalactosaminide alpha-2,6-sialyltransferase 1-like
gene3772:106577891	22.31	-1.25602	0.409806	0.00217723	0.0771401	106577891	LOC106577891	zinc finger and BTB domain-containing protein 16-A-like
gene41585:106580454	17.6149	-1.45291	0.474096	0.00217964	0.0771401	106580454	LOC106580454	5-hydroxytryptamine receptor 7-like
gene47475:100194626	2316.75	0.553751	0.180736	0.00218493	0.0771401	100194626	atp5g3	ATP synthase, H+ transporting, mitochondrial F0 complex, subunit c-3
gene5018:106590349	20.0325	-2.23633	0.730057	0.00218963	0.0771401	106590349	LOC106590349	uncharacterized LOC106590349
gene5996:106598127	33.2154	-1.27713	0.416769	0.00218131	0.0771401	106598127	LOC106598127	amyloid beta A4 precursor protein-binding family B member 1-interacting protein-like
gene23119:106562284	96.1157	-1.0215	0.333787	0.00221098	0.0777908	106562284	LOC106562284	interferon regulatory factor 8-like
gene51494:106589940	399.14	0.814837	0.266301	0.00221456	0.0778152	106589940	LOC106589940	kinesin-like protein KIF20B
gene3041:106571656	77.3613	-0.828656	0.271218	0.00224822	0.0788954	106571656	LOC106571656	peptidyl-glycine alpha-amidating monooxygenase B-like
gene26542:106565632	325.601	-0.703774	0.230562	0.00226995	0.0795544	106565632	LOC106565632	solute carrier family 45 member 3-like
gene41422:106580360	249.745	0.698906	0.229002	0.00227348	0.0795747	106580360	kntc1	kinetochore associated 1
gene46169:106584897	100.097	-0.6961	0.228179	0.00228324	0.0798127	106584897	LOC106584897	calcium/calmodulin-dependent protein kinase type II subunit beta
gene4139:106581964	215.276	-0.532835	0.174743	0.00229417	0.080091	106581964	LOC106581964	G-protein-signaling modulator 1-like
gene13644:100195790	1137.8	-0.590566	0.193801	0.00230926	0.0803062	100195790	cor1a	Coronin-1A
gene47464:106586236	191.606	0.911528	0.299105	0.00230741	0.0803062	106586236	LOC106586236	cell division cycle-associated protein 7-like
gene50537:106588974	111.609	-1.36923	0.449256	0.0023055	0.0803062	106588974	LOC106588974	src-like-adapter
gene24464:106563611	222.313	-0.577515	0.189651	0.00232572	0.0807355	106563611	zbtb20	zinc finger and BTB domain containing 20
gene6732:106600445	148.838	-0.912814	0.299785	0.00232758	0.0807355	106600445	LOC106600445	C-C motif chemokine 2-like
gene15987:106609070	51.5571	-1.4315	0.47028	0.00233509	0.0808919	106609070	LOC106609070	uncharacterized LOC106609070
gene23729:106562887	22.1993	-1.64868	0.541772	0.00234128	0.0808999	106562887	LOC106562887	zinc finger and BTB domain-containing protein 43-like
gene29103:106567806	818.524	0.678384	0.222923	0.00234132	0.0808999	106567806	LOC106567806	non-histone chromosomal protein HMG-14A-like
gene31550:106570424	127.946	-0.661609	0.217505	0.00235163	0.0811524	106570424	hsf1	heat shock transcription factor 1
gene14626:100194940	131.235	0.806792	0.265323	0.00235957	0.0812187	100194940	esco2	establishment of sister chromatid cohesion N-acetyltransferase 2
gene26611:106565886	1208.09	0.510048	0.167732	0.00235913	0.0812187	106565886	LOC106565886	heterochromatin protein 1-binding protein 3-like
gene14158:106607260	1206.62	0.534583	0.175866	0.00236791	0.0814018	106607260	LOC106607260	prohibitin
gene20045:106612966	270.002	-0.65069	0.214399	0.0024058	0.0825992	106612966	LOC106612966	protein c-ets-1-B
gene49837:106588411	32.062	1.15001	0.378985	0.00240969	0.0826277	106588411	LOC106588411	transcription factor 19-like
gene30232:106569084	301.252	0.578995	0.190872	0.00241796	0.0827011	106569084	LOC106569084	kinesin-like protein KIF2C
gene4535:106586040	218.014	-1.17624	0.387746	0.00241699	0.0827011	106586040	LOC106586040	uncharacterized LOC106586040
gene11766:106605178	122.934	-0.878121	0.289597	0.00242765	0.082854	106605178	LOC106605178	cornifelin-like
gene17372:106610434	216.694	-0.881007	0.290633	0.00243471	0.082854	106610434	LOC106610434	semaphorin-4F-like
gene1970:106560625	84.1084	-1.0327	0.340607	0.00242977	0.082854	106560625	pdcl	phosducin like
gene46633:106585576	144.923	0.950012	0.313376	0.00243313	0.082854	106585576	LOC106585576	centromere-associated protein E-like
gene17971:106610986	112.531	0.734574	0.242386	0.00244072	0.0829536	106610986	LOC106610986	transforming acidic coiled-coil-containing protein 3-like
gene21981:100136562	3067.26	0.751026	0.248243	0.00248335	0.0838999	100136562	tpm1	tropomyosin 1 (alpha)
gene29032:106567863	712.996	0.621555	0.205463	0.00248512	0.0838999	106567863	LOC106567863	ribonucleoside-diphosphate reductase large subunit
gene29105:106568034	40.5933	-1.12302	0.37126	0.00248721	0.0838999	106568034	LOC106568034	connector enhancer of kinase suppressor of ras 2-like
gene29324:106568155	1046.89	0.472606	0.156201	0.00248117	0.0838999	106568155	LOC106568155	NAD(P) transhydrogenase, mitochondrial-like
gene29827:106568733	80.9771	-0.843649	0.278898	0.00248686	0.0838999	106568733	LOC106568733	regulator of G-protein signaling 8-like
gene34708:106573755	775.193	0.825053	0.272619	0.00247486	0.0838999	106573755	LOC106573755	uncharacterized LOC106573755
gene2222:106562987	103.607	-0.916865	0.303256	0.00249948	0.0840311	106562987	LOC106562987	ABC transporter G family member 20-like
gene35442:100846959	409.835	0.664482	0.219738	0.00249476	0.0840311	100846959	cd99	CD99 molecule
gene54:106578466	31.2161	-1.19136	0.39406	0.00250044	0.0840311	106578466	LOC106578466	T-cell receptor beta-1 chain C region-like
gene36897:106575803	31.3847	-1.19971	0.397025	0.00251315	0.0843531	106575803	LOC106575803	B- and T-lymphocyte attenuator-like
gene1712:100194748	1142.75	0.392029	0.129792	0.002524	0.0843705	100194748	pgam1	Phosphoglycerate mutase 1
gene21001:106613945	86.9706	-0.876266	0.290089	0.00252211	0.0843705	106613945	LOC106613945	interleukin-12 receptor subunit beta-2-like
gene27892:106566895	132.33	-0.758123	0.251144	0.00253876	0.0843705	106566895	LOC106566895	histone deacetylase 7-like
gene36165:106575150	21.4465	-2.34286	0.776198	0.00254134	0.0843705	106575150	LOC106575150	interleukin-10 receptor subunit beta-like
gene3774:106577885	53.1394	-0.943094	0.312457	0.00254181	0.0843705	106577885	LOC106577885	uncharacterized LOC106577885
gene39896:106578804	123.598	0.920777	0.304861	0.00252511	0.0843705	106578804	LOC106578804	kinesin-like protein KIF20B
gene44456:100380606	86.8181	0.901017	0.298516	0.00254178	0.0843705	100380606	prph	peripherin
gene53865:106592423	49.7949	0.956359	0.316697	0.00252947	0.0843705	106592423	LOC106592423	DNA polymerase theta-like
gene76299:106594784	60.8063	1.17957	0.390662	0.00253274	0.0843705	106594784	LOC106594784	structural maintenance of chromosomes protein 2-like
gene25597:106564748	44.506	1.44117	0.477766	0.00255741	0.0844727	106564748	LOC106564748	39S ribosomal protein L45, mitochondrial-like
gene29490:106568384	230.208	0.59969	0.198771	0.00255295	0.0844727	106568384	LOC106568384	NADH dehydrogenase [ubiquinone] 1 alpha subcomplex subunit 8-like
gene46254:106585186	86.1505	0.999187	0.331231	0.00255639	0.0844727	106585186	LOC106585186	zinc finger protein 367-like
gene68156:106593189	30.2885	-1.26487	0.419175	0.00254855	0.0844727	106593189	LOC106593189	uncharacterized LOC106593189
gene1851:106611671	93.0105	-1.41041	0.467874	0.00257402	0.0846271	106611671	LOC106611671	calcium-activated potassium channel subunit alpha-1-like
gene21359:106560548	317.67	0.854846	0.283516	0.00256842	0.0846271	106560548	LOC106560548	abnormal spindle-like microcephaly-associated protein homolog
gene293:106566892	93.3705	-1.06431	0.353071	0.00257463	0.0846271	106566892	LOC106566892	disintegrin and metalloproteinase domain-containing protein 17-like
gene29427:106568343	83.3126	-0.779706	0.258586	0.00256748	0.0846271	106568343	LOC106568343	calcium/calmodulin-dependent protein kinase type IV-like
gene3382:106574283	581.82	0.598642	0.198637	0.00258038	0.084713	106574283	LOC106574283	acidic leucine-rich nuclear phosphoprotein 32 family member E-like
gene16289:106609392	36.3809	-1.25014	0.414919	0.00258691	0.0847925	106609392	LOC106609392	probable polypeptide N-acetylgalactosaminyltransferase 8
gene61706:106592767	770.133	0.590775	0.196093	0.00258908	0.0847925	106592767	LOC106592767	acidic leucine-rich nuclear phosphoprotein 32 family member E-like
gene42792:100195196	62.8173	-1.00196	0.332741	0.00260189	0.0851087	100195196	ebi2	EBV-induced G-protein coupled receptor 2
gene4248:106582879	1903.31	0.668813	0.222305	0.00262509	0.0853503	106582879	LOC106582879	uncharacterized LOC106582879
gene4379:106584053	94.3275	0.835708	0.277746	0.00262206	0.0853503	106584053	mms22l	MMS22 like, DNA repair protein
gene44459:106583278	18.7974	1.51642	0.503819	0.00261372	0.0853503	106583278	LOC106583278	tubulin alpha chain-like
gene7425:106601135	142.297	-0.679325	0.225797	0.00262488	0.0853503	106601135	LOC106601135	formin-like protein 1
gene9555:106602990	894.04	0.589079	0.195779	0.00262192	0.0853503	106602990	LOC106602990	cytochrome c oxidase subunit 8B, mitochondrial-like
gene15771:106608875	102.502	-0.688472	0.228927	0.00263499	0.0855691	106608875	LOC106608875	golgin subfamily A member 6-like protein 22
gene35491:106574355	369.891	-0.736742	0.245038	0.00264146	0.0856759	106574355	LOC106574355	protein NLRC3-like
gene19498:106612477	422.75	-0.421465	0.14022	0.00264935	0.0857489	106612477	kmt2a	lysine methyltransferase 2A
gene2951:100286640	170.144	0.847679	0.282028	0.00265006	0.0857489	100286640	pole3	DNA polymerase epsilon 3, accessory subunit
gene23078:100195281	256.14	0.535149	0.178136	0.00266316	0.0860696	100195281	e2f4	E2F transcription factor 4
gene27818:100196854	382.057	0.777559	0.258952	0.00267589	0.0861713	100196854	prim1	DNA primase subunit 1
gene28560:106567437	56.2189	-1.03204	0.343684	0.00267448	0.0861713	106567437	LOC106567437	interleukin-12 subunit beta-like
gene36305:106575168	2198.65	0.981125	0.32671	0.00267294	0.0861713	106575168	LOC106575168	desmin-like
gene14245:106607474	122.53	-0.612129	0.203925	0.00268448	0.0862422	106607474	LOC106607474	neurabin-2-like
gene6728:106600142	273.256	-0.78843	0.262636	0.00268225	0.0862422	106600142	LOC106600142	C-C motif chemokine 20-like
gene42921:106581830	1097.57	0.900967	0.300299	0.00269771	0.0865641	106581830	LOC106581830	myosin light chain kinase, smooth muscle-like
gene46017:106584705	92.1239	-1.21112	0.40378	0.00270454	0.0866802	106584705	LOC106584705	transcription factor PU.1-like
gene11806:106605153	3069.82	0.784344	0.261631	0.00271848	0.0870236	106605153	LOC106605153	uncharacterized LOC106605153
gene33917:106572767	56.4499	-1.26585	0.422359	0.00272569	0.087151	106572767	LOC106572767	tumor necrosis factor receptor superfamily member 5-like
gene45458:106584085	77.9187	0.942841	0.314635	0.00272991	0.0871825	106584085	LOC106584085	uncharacterized LOC106584085
gene8080:106601721	25.6342	-2.09401	0.698957	0.0027363	0.0872836	106601721	LOC106601721	Ig heavy chain V region XIG14-like
gene17158:106610250	79.8761	-0.995725	0.332442	0.0027428	0.0872863	106610250	LOC106610250	TBC1 domain family member 9-like
gene45796:106584534	318.754	-0.65275	0.217941	0.00274377	0.0872863	106584534	LOC106584534	Golgi apparatus protein 1-like
gene47787:106586577	217.429	-0.787829	0.263064	0.00274609	0.0872863	106586577	LOC106586577	CMP-N-acetylneuraminate-beta-galactosamide-alpha-2,3-sialyltransferase 1-like
gene26015:106565219	2521.95	0.777835	0.259819	0.00275569	0.0873203	106565219	LOC106565219	myosin regulatory light polypeptide 9
gene34928:106573547	200.59	0.839649	0.280541	0.00276284	0.0873203	106573547	LOC106573547	tropomyosin alpha-4 chain-like
gene36062:106574991	25.8169	1.19611	0.399649	0.00276334	0.0873203	106574991	LOC106574991	uncharacterized LOC106574991
gene47817:106586597	72.712	0.941695	0.314628	0.00276212	0.0873203	106586597	ska3	spindle and kinetochore associated complex subunit 3
gene49909:106588347	51.9507	0.93825	0.313364	0.00275234	0.0873203	106588347	LOC106588347	protein AF1q-like
gene5171:106591603	870.596	-0.651008	0.217704	0.00278673	0.0879562	106591603	LOC106591603	lipopolysaccharide-induced tumor necrosis factor-alpha factor homolog
gene17486:106610534	95.7417	-0.926637	0.310063	0.00280311	0.08837	106610534	LOC106610534	solute carrier family 43 member 3-like
gene11852:106605226	170.279	-0.534764	0.178992	0.00281146	0.0885057	106605226	LOC106605226	retroviral integration site protein Fli-1 homolog
gene46040:106584759	471.434	-0.712511	0.238545	0.00281819	0.0885057	106584759	LOC106584759	intestinal mucin-like protein
gene4771:106587077	171.766	-0.758223	0.253871	0.00282053	0.0885057	106587077	LOC106587077	phosphoinositide 3-kinase regulatory subunit 5-like
gene50586:106589012	28.2421	1.2321	0.412529	0.00282007	0.0885057	106589012	LOC106589012	four and a half LIM domains protein 3-like
gene21097:106560278	53.8305	1.05649	0.353792	0.00282469	0.0885333	106560278	LOC106560278	uncharacterized LOC106560278
gene47393:106586160	1431.51	0.773273	0.259239	0.00285577	0.0893	106586160	LOC106586160	myosin light chain kinase, smooth muscle-like
gene51132:106589585	152.186	0.918103	0.307783	0.00285479	0.0893	106589585	dlgap5	DLG associated protein 5
gene21754:106560990	198.333	-0.596168	0.199966	0.00286987	0.0896196	106560990	cdkn1b	cyclin dependent kinase inhibitor 1B
gene64:106589466	21.855	-1.36012	0.456257	0.00287264	0.0896196	106589466	LOC106589466	legumain-like
gene7680:106601366	34.7808	-0.976493	0.327623	0.00287742	0.0896652	106601366	LOC106601366	tetraspanin-1-like
gene14879:106608066	19.0791	-1.49085	0.500358	0.00288647	0.0898045	106608066	LOC106608066	1-phosphatidylinositol 4,5-bisphosphate phosphodiesterase beta-4-like
gene26632:106565864	770.021	0.659429	0.221359	0.00289188	0.0898045	106565864	LOC106565864	T-complex protein 11-like protein 2
gene42970:106581789	69.559	0.941365	0.315972	0.00288935	0.0898045	106581789	spc25	SPC25, NDC80 kinetochore complex component
gene63819:106591341	63.8955	1.15803	0.388943	0.00290734	0.0901809	106591341	LOC106591341	serine/threonine-protein kinase PLK1-like
gene11907:106605270	52.1869	-0.935598	0.314331	0.00291583	0.0903405	106605270	LOC106605270	DNA-binding protein SATB1-like
gene31089:106570037	120.048	0.897688	0.30171	0.00292667	0.0905725	106570037	clspn	claspin
gene11169:100195170	192.346	0.829579	0.279121	0.0029576	0.0913302	100195170	ccna2	cyclin A2
gene9415:106602876	1497.52	0.402116	0.135298	0.00295792	0.0913302	106602876	LOC106602876	ATP synthase subunit g, mitochondrial-like
gene26541:106565634	1423.67	0.567177	0.190892	0.00296639	0.0913826	106565634	LOC106565634	nuclear ubiquitous casein and cyclin-dependent kinase substrate 1-like
gene38814:106577671	93.0684	1.231	0.414261	0.00296302	0.0913826	106577671	LOC106577671	uncharacterized LOC106577671
gene60205:106594197	20.7462	-1.24869	0.42057	0.0029874	0.0919248	106594197	LOC106594197	neurobeachin-like protein 2
gene42007:106580845	114.309	-0.717933	0.24186	0.00299375	0.0919336	106580845	rinl	Ras and Rab interactor like
gene4554:106585823	212.344	-0.640836	0.215893	0.0029945	0.0919336	106585823	LOC106585823	N-acetyllactosaminide beta-1,3-N-acetylglucosaminyltransferase 2-like
gene22155:100196159	73.3052	1.04404	0.351823	0.00300202	0.0920597	100196159	paf	PCNA-associated factor
gene26487:106565678	151.004	0.721979	0.243477	0.00302401	0.092419	106565678	espl1	extra spindle pole bodies like 1, separase
gene33388:106572080	74.1043	-0.8246	0.278056	0.00302102	0.092419	106572080	LOC106572080	src-like-adapter 2
gene6395:106599389	352.415	0.900986	0.303843	0.00302389	0.092419	106599389	LOC106599389	kinesin-like protein KIF2C
gene22658:100306857	572.878	0.748703	0.25259	0.00303562	0.0926689	100306857	inceb	Inner centromere protein B
gene21833:106560912	259.434	0.797892	0.269353	0.00305389	0.0930161	106560912	LOC106560912	actin-binding protein anillin-like
gene9732:106603217	32.566	-1.21456	0.409991	0.00305249	0.0930161	106603217	LOC106603217	P2Y purinoceptor 14-like
gene13180:106606531	133.908	-0.587692	0.198517	0.00307231	0.0931567	106606531	rfx1	regulatory factor X1
gene25376:106564527	146.885	-0.678464	0.229163	0.00307019	0.0931567	106564527	LOC106564527	hematopoietic lineage cell-specific protein-like
gene32613:106571433	57.269	-1.08415	0.366201	0.00307108	0.0931567	106571433	LOC106571433	inositol-trisphosphate 3-kinase B-like
gene48004:106586767	22644.7	-1.01779	0.343686	0.00306234	0.0931567	106586767	LOC106586767	titin-like
gene17849:106610844	184.231	0.801688	0.270889	0.00308173	0.0933372	106610844	LOC106610844	rho GTPase-activating protein 11A-like
gene2993:106571225	1051.1	0.688549	0.232702	0.00308713	0.093396	106571225	lmnb1	lamin B1
gene26209:106565346	1111.63	-1.69298	0.572235	0.00309106	0.0934102	106565346	LOC106565346	peptidyl-prolyl cis-trans isomerase FKBP5-like
gene40651:106579526	76.0991	0.946868	0.320157	0.00310128	0.0935097	106579526	LOC106579526	myb-related protein A-like
gene69032:106591996	35.8485	-1.08233	0.365936	0.00309931	0.0935097	106591996	LOC106591996	proto-oncogene c-Rel-like
gene37707:106576618	82.3814	0.914119	0.309144	0.00310711	0.0935808	106576618	LOC106576618	methionine-R-sulfoxide reductase B3-like
gene45690:106584418	37.9271	0.995376	0.336738	0.00311723	0.093781	106584418	LOC106584418	cyclin-dependent kinases regulatory subunit 1-like
gene6709:100380467	250.291	0.671893	0.227453	0.00313702	0.0942712	100380467	mc6zb	Zygotic DNA replication licensing factor mcm6-B
gene26340:106565449	23.0263	-1.28057	0.433737	0.00315296	0.0945151	106565449	LOC106565449	arf-GAP with GTPase, ANK repeat and PH domain-containing protein 1-like
gene4149:106582030	31.6216	-1.15574	0.39149	0.00315564	0.0945151	106582030	LOC106582030	DNA-binding protein SATB1-like
gene43416:106582258	183.005	-0.618292	0.209429	0.0031545	0.0945151	106582258	LOC106582258	interleukin-1 receptor type 1-like
gene14521:100306819	175.536	-0.574002	0.194528	0.00317006	0.0947938	100306819	fyn	Proto-oncogene tyrosine-protein kinase FYN
gene18014:106610951	31.0065	-1.31458	0.445587	0.00317548	0.0947938	106610951	LOC106610951	neuroblast differentiation-associated protein AHNAK-like
gene46165:106584895	1952.83	0.556766	0.188709	0.00317376	0.0947938	106584895	LOC106584895	histone H2A.V-like
gene19468:106612453	288.689	-0.688443	0.233465	0.00319002	0.0951226	106612453	LOC106612453	dedicator of cytokinesis protein 10-like
gene2946:106570345	94.1074	-0.79946	0.271226	0.00320273	0.0953962	106570345	LOC106570345	uncharacterized LOC106570345
gene44021:106582856	52.7506	-0.99512	0.337779	0.00321842	0.0957577	106582856	LOC106582856	uncharacterized LOC106582856
gene26850:106565992	37.984	-1.28492	0.436272	0.00322715	0.0959118	106565992	LOC106565992	tumor necrosis factor receptor superfamily member 9-like
gene33128:106571961	1054.23	0.559735	0.190095	0.00323473	0.0960312	106571961	atp5e	ATP synthase, H+ transporting, mitochondrial F1 complex, epsilon subunit
gene18195:106611254	116.533	-0.735915	0.249968	0.00323967	0.0960722	106611254	LOC106611254	B-cell lymphoma/leukemia 11B-like
gene453:106582390	181.827	0.586356	0.199197	0.00324424	0.0961021	106582390	LOC106582390	signal recognition particle 14 kDa protein-like
gene535:106593072	271.467	0.530637	0.180375	0.00326243	0.0965349	106593072	gstz1	glutathione S-transferase zeta 1
gene27703:100136527	2493.28	-0.604335	0.205534	0.00327883	0.0968079	100136527	slc6a6	solute carrier family 6 (neurotransmitter transporter, taurine), member 6
gene30691:100195048	55.8543	1.12349	0.382059	0.00327561	0.0968079	100195048	myp0	Myelin P0 protein
gene35344:106574390	193.689	-1.29299	0.43985	0.00328627	0.0968158	106574390	LOC106574390	uncharacterized LOC106574390
gene46271:100194574	6609.37	0.357063	0.121454	0.00328304	0.0968158	100194574	atp5a1	ATP synthase, H+ transporting, mitochondrial F1 complex, alpha subunit 1, cardiac muscle
gene51739:106590189	92.3376	-1.07125	0.364515	0.00329444	0.0969508	106590189	LOC106590189	C-C chemokine receptor type 9-like
gene46399:106585071	1590.81	0.68422	0.232958	0.00331297	0.0973308	106585071	LOC106585071	proliferating cell nuclear antigen
gene6051:106598496	319.456	-0.719255	0.244899	0.00331457	0.0973308	106598496	LOC106598496	relaxin-like
gene32478:106571317	404.316	-0.513425	0.174967	0.00334181	0.0980239	106571317	LOC106571317	tyrosine-protein kinase Fyn-like
gene18360:106611410	48.5188	-0.939041	0.320107	0.00335144	0.0981998	106611410	LOC106611410	transcriptional-regulating factor 1-like
gene41557:100195156	92.1849	0.843714	0.287758	0.0033676	0.0985662	100195156	cdc45	cell division cycle 45
gene10989:106604351	50.0706	-0.869027	0.296484	0.00337749	0.0986418	106604351	LOC106604351	tyrosine-protein kinase ITK/TSK-like
gene37954:106576749	845.321	-0.797356	0.272003	0.0033741	0.0986418	106576749	LOC106576749	uncharacterized LOC106576749
gene1856:106613470	124.01	-1.06064	0.361942	0.00338504	0.0986487	106613470	LOC106613470	glycine N-acyltransferase-like protein 3
gene9956:106603600	56.7523	-1.15752	0.394979	0.00338332	0.0986487	106603600	LOC106603600	misshapen-like kinase 1
gene2528:106566806	170.886	-0.690684	0.23573	0.00338983	0.0986816	106566806	LOC106566806	PH and SEC7 domain-containing protein 4-like
gene25625:106564953	104.465	0.776419	0.265098	0.0034027	0.0988431	106564953	LOC106564953	insulin-like growth factor-binding protein 4
gene6413:100195213	191.784	0.492359	0.1681	0.00340084	0.0988431	100195213	dcup	Uroporphyrinogen decarboxylase
gene34824:106573648	103.552	-1.05667	0.360884	0.00341151	0.0988863	106573648	LOC106573648	olfactomedin-4-like
gene46578:100196511	190.061	0.845561	0.288772	0.00341015	0.0988863	100196511	sld5	DNA replication complex GINS protein SLD5
gene44447:106583286	145.338	0.647018	0.221106	0.00343042	0.0992273	106583286	LOC106583286	cyclin-dependent kinase 4-like
gene48961:106587728	40.8272	1.0212	0.349004	0.00343312	0.0992273	106587728	LOC106587728	kinesin-like protein KIF23
gene5681:106596304	37.4431	-1.09924	0.37569	0.00343431	0.0992273	106596304	usp33	ubiquitin specific peptidase 33
gene46002:106584737	28.1877	-1.55708	0.532345	0.0034452	0.0993294	106584737	LOC106584737	DNA-binding protein RFX7-like
gene68473:106596096	46.5833	1.08282	0.370178	0.00344315	0.0993294	106596096	LOC106596096	tRNA-splicing ligase RtcB homolog
gene15866:106608969	48.2424	-0.89442	0.305834	0.00344985	0.0993572	106608969	LOC106608969	adenylate cyclase type 4-like
gene14539:106607751	465.811	-0.481366	0.164646	0.00345958	0.0994508	106607751	map3k5	mitogen-activated protein kinase kinase kinase 5
gene22732:106561891	646.175	0.403776	0.138112	0.00346067	0.0994508	106561891	gnmt	glycine N-methyltransferase
gene26092:106565146	81.2054	-0.763907	0.261323	0.00346416	0.0994508	106565146	LOC106565146	uncharacterized LOC106565146
gene16809:106609896	113.374	0.679611	0.232574	0.00347645	0.0994861	106609896	LOC106609896	pre-mRNA-processing factor 19
gene34155:100196028	74.7283	-0.861081	0.294637	0.00347218	0.0994861	100196028	taz	tafazzin
gene36107:106575037	495.217	0.471766	0.16143	0.00347325	0.0994861	106575037	mrpl16	mitochondrial ribosomal protein L16
gene28713:106567592	228.319	0.573435	0.196315	0.00348923	0.0997462	106567592	LOC106567592	protein FAM168A-like
gene11148:100196397	398.784	0.549999	0.188506	0.00352654	0.100166	100196397	tma20	Translation machinery-associated protein 20
gene11842:106605237	25.6996	-1.94343	0.665859	0.00351514	0.100166	106605237	LOC106605237	serine/threonine-protein kinase Nek8-like
gene25436:106564589	152.325	0.640219	0.21945	0.00352991	0.100166	106564589	LOC106564589	DNA polymerase lambda-like
gene29412:106568321	143.769	-0.655773	0.224646	0.00350997	0.100166	106568321	LOC106568321	interleukin-6 receptor subunit beta-like
gene31573:106570440	136.233	-0.643087	0.220369	0.0035203	0.100166	106570440	LOC106570440	engulfment and cell motility protein 1-like
gene34384:106573190	29.2755	-1.19433	0.409372	0.00352884	0.100166	106573190	LOC106573190	cat eye syndrome critical region protein 2-like
gene45563:106584322	628.334	0.671979	0.230247	0.00351701	0.100166	106584322	LOC106584322	torsin-3A-like
gene20610:106613600	759.508	0.420469	0.144209	0.003549	0.100176	106613600	LOC106613600	small glutamine-rich tetratricopeptide repeat-containing protein alpha-like
gene23234:106562384	108.331	-0.620724	0.212914	0.00355254	0.100176	106562384	LOC106562384	adenylate cyclase type 2-like
gene28329:106567195	52.4347	-1.22224	0.419228	0.0035516	0.100176	106567195	LOC106567195	uncharacterized LOC106567195
gene28739:106567642	36.6902	-1.06836	0.36636	0.00354377	0.100176	106567642	LOC106567642	cytotoxic and regulatory T-cell molecule-like
gene30881:106569760	217.539	-0.640552	0.219712	0.00355218	0.100176	106569760	LOC106569760	rho GTPase-activating protein 29-like
gene9230:106602803	19.7554	1.82585	0.625961	0.0035356	0.100176	106602803	LOC106602803	perilipin-2-like
gene20408:106613396	432.472	-0.605732	0.207889	0.00357142	0.100394	106613396	LOC106613396	trehalase-like
gene3731:106578237	1714.29	-0.730772	0.250768	0.00356682	0.100394	106578237	LOC106578237	sialic acid-binding Ig-like lectin 16
gene37997:100136402	251.542	0.785561	0.269589	0.00356925	0.100394	100136402	glud1	glutamate dehydrogenase 1
gene388:106577869	241.401	-0.547019	0.187765	0.00357606	0.10042	106577869	LOC106577869	ral GTPase-activating protein subunit alpha-2-like
gene13978:106607136	110.303	-0.653106	0.22425	0.00358661	0.100462	106607136	LOC106607136	ankyrin repeat and fibronectin type-III domain-containing protein 1-like
gene1784:100195574	192.611	0.591856	0.203267	0.00359443	0.100462	100195574	sfxn2	sideroflexin 2
gene24580:106563738	25.9418	-1.56465	0.537193	0.0035838	0.100462	106563738	LOC106563738	T-cell surface antigen CD2-like
gene3521:106575638	24.4823	-1.76684	0.606794	0.00359398	0.100462	106575638	tigit	T-cell immunoreceptor with Ig and ITIM domains
gene720:106601624	208.473	-0.57756	0.198367	0.00359616	0.100462	106601624	LOC106601624	protein LBH-like
gene10200:106603673	368.6	0.755716	0.259606	0.00360256	0.100501	106603673	ncapd3	non-SMC condensin II complex subunit D3
gene21406:106560596	1677.46	0.748369	0.257204	0.00361849	0.100501	106560596	lmnb2	lamin B2
gene28632:106567524	162.109	-0.736568	0.25307	0.00360817	0.100501	106567524	LOC106567524	transcription factor 7-like 2
gene37373:106576270	128.881	-0.822756	0.282781	0.00361993	0.100501	106576270	LOC106576270	transcription factor Spi-C-like
gene40176:106579329	84.1537	-0.767729	0.263853	0.00361795	0.100501	106579329	LOC106579329	thyroid hormone receptor alpha-like
gene61788:106592078	66.2523	-0.814404	0.27987	0.00361498	0.100501	106592078	LOC106592078	lysophosphatidic acid receptor 6-like
gene20429:106613416	82.215	-0.811665	0.279136	0.00364009	0.10075	106613416	LOC106613416	E3 ubiquitin-protein ligase HERC2-like
gene28770:106567727	180.411	-1.36054	0.467833	0.00363533	0.10075	106567727	LOC106567727	zinc finger and BTB domain-containing protein 16-A-like
gene6933:106600541	47.7863	-0.964772	0.331779	0.00363895	0.10075	106600541	LOC106600541	zinc finger and BTB domain-containing protein 46-like
gene28986:106567903	1525.74	-0.453607	0.156077	0.00365727	0.101122	106567903	LOC106567903	solute carrier organic anion transporter family member 2B1-like
gene47680:106586448	31.9625	-1.34271	0.462068	0.00366235	0.101159	106586448	LOC106586448	microtubule-associated protein 2-like
gene1333:100380323	1808.34	-0.731058	0.251885	0.00370376	0.102198	100380323	mot9	Monocarboxylate transporter 9
gene14091:106607317	162.596	-0.600941	0.207163	0.00372193	0.102515	106607317	LOC106607317	formin-like protein 1
gene74829:106591041	32.4955	-0.969255	0.334141	0.00372286	0.102515	106591041	LOC106591041	DNA (cytosine-5)-methyltransferase 3A-like
gene26640:106565858	1544.79	-0.811668	0.279891	0.00373232	0.102612	106565858	LOC106565858	calcium/calmodulin-dependent protein kinase type 1-like
gene27344:106566297	195.895	-0.586896	0.202396	0.00373466	0.102612	106566297	LOC106566297	translation initiation factor IF-2-like
gene34746:106573721	217.322	-0.857758	0.295831	0.00373776	0.102612	106573721	cetp	cholesteryl ester transfer protein
gene24316:106563474	158.795	-0.675147	0.232958	0.00375376	0.102821	106563474	LOC106563474	uncharacterized LOC106563474
gene34033:106572896	36.3338	-1.23123	0.424794	0.00375055	0.102821	106572896	LOC106572896	AMP deaminase 2-like
gene46646:106585549	229.161	-0.463214	0.159845	0.00375684	0.102821	106585549	LOC106585549	probable cytosolic iron-sulfur protein assembly protein ciao1-B
gene62732:106590806	412.882	0.455698	0.157302	0.00376805	0.103024	106590806	LOC106590806	WASH complex subunit strumpellin-like
gene14368:106607573	32.2614	1.23096	0.425042	0.0037785	0.103205	106607573	LOC106607573	serine/threonine-protein kinase Nek2-like
gene29495:106568376	81.7644	-0.785454	0.271281	0.00378727	0.10334	106568376	LOC106568376	rab GTPase-activating protein 1-like
gene43919:106582752	140.57	-1.06078	0.366567	0.00380591	0.103744	106582752	LOC106582752	sodium-coupled neutral amino acid transporter 3-like
gene14705:106607877	79.0867	-1.00996	0.349127	0.00381813	0.103972	106607877	LOC106607877	adhesion G-protein coupled receptor F2-like
gene51115:106589571	214.326	0.584737	0.202209	0.00383116	0.104221	106589571	LOC106589571	ATP synthase mitochondrial F1 complex assembly factor 2-like
gene27757:106566621	636.575	-0.94321	0.326226	0.00383685	0.104271	106566621	LOC106566621	interleukin-17 receptor C-like
gene14713:106607886	175.702	0.899013	0.311055	0.00384984	0.104511	106607886	LOC106607886	uncharacterized LOC106607886
gene31344:106570183	241.582	-0.627533	0.217146	0.00385342	0.104511	106570183	LOC106570183	protein Jumonji-like
gene7886:106601509	21.9344	1.38927	0.480923	0.00386782	0.104796	106601509	LOC106601509	protein kinase C and casein kinase substrate in neurons protein 3-like
gene7263:106600852	3564.8	0.899125	0.311294	0.00387272	0.104824	106600852	LOC106600852	collagen alpha-1(I) chain-like
gene33921:106572746	109.19	-0.795608	0.275511	0.00387996	0.104904	106572746	LOC106572746	uncharacterized LOC106572746
gene44239:106583125	21.4684	-1.18585	0.410689	0.00388344	0.104904	106583125	LOC106583125	PHD finger protein 13-like
gene46401:106585070	55.093	-0.929878	0.322338	0.00391667	0.10559	106585070	LOC106585070	solute carrier family 23 member 2-like
gene48502:106587222	22.1947	-1.51643	0.525659	0.00391638	0.10559	106587222	LOC106587222	neuronal acetylcholine receptor subunit alpha-5-like
gene50398:106588823	118.209	0.664789	0.230502	0.00392547	0.105687	106588823	gmnn	geminin, DNA replication inhibitor
gene692:106600514	10142.1	-0.689341	0.239033	0.00392811	0.105687	106600514	LOC106600514	glutamyl aminopeptidase-like
gene25359:106564502	386.11	-0.82838	0.287357	0.00394209	0.105852	106564502	LOC106564502	volume-regulated anion channel subunit LRRC8C-like
gene49848:106588401	48977.4	-0.662615	0.229843	0.00394033	0.105852	106588401	LOC106588401	class I histocompatibility antigen, F10 alpha chain-like
gene34524:100196677	426.771	0.482724	0.16748	0.00394812	0.105909	100196677	LOC100196677	26S proteasome non-ATPase regulatory subunit 7 like 2
gene34895:106573581	240.082	-0.909127	0.315471	0.00395405	0.105962	106573581	LOC106573581	protein strawberry notch homolog 2-like
gene35824:106574739	53.7558	-0.949045	0.329541	0.00397806	0.1065	106574739	LOC106574739	probable G-protein coupled receptor 34
gene19675:106612607	698.151	0.598783	0.207949	0.00398351	0.106534	106612607	LOC106612607	heterogeneous nuclear ribonucleoprotein L-like
gene40488:100194942	374.601	0.776952	0.269853	0.00398721	0.106534	100194942	tgfi1	Transforming growth factor beta-1-induced transcript 1 protein
gene24475:106563621	149.984	0.802576	0.278925	0.00400979	0.106609	106563621	LOC106563621	kinesin-like protein KIF20A
gene26276:106565395	51.1284	-0.91041	0.316309	0.00399918	0.106609	106565395	LOC106565395	transcription factor SOX-4-like
gene38597:106577496	49.0603	1.02719	0.356951	0.00400602	0.106609	106577496	LOC106577496	actin-binding LIM protein 2-like
gene38945:106577838	62.929	-0.937387	0.325766	0.00400858	0.106609	106577838	LOC106577838	shootin-1-like
gene44923:106583718	302.439	0.592729	0.205907	0.00399409	0.106609	106583718	LOC106583718	coiled-coil domain-containing protein 51-like
gene2554:106566653	126.117	-0.719492	0.250128	0.00402126	0.106809	106566653	LOC106566653	phosphatidylinositol 4-phosphate 5-kinase type-1 beta-like
gene23972:106563129	22.9056	1.20806	0.420165	0.00403764	0.107005	106563129	LOC106563129	syntaxin-binding protein 1-like
gene27826:106566713	219.567	1.18196	0.411124	0.00404105	0.107005	106566713	LOC106566713	glycerol-3-phosphate dehydrogenase [NAD(+)], cytoplasmic-like
gene34911:106573564	253.091	0.650307	0.226211	0.00404314	0.107005	106573564	LOC106573564	mitochondrial import inner membrane translocase subunit Tim13
gene50409:106588839	201.721	0.669374	0.232852	0.00404451	0.107005	106588839	LOC106588839	collagen alpha-1(XVI) chain-like
gene3510:106575530	672.42	0.542455	0.188836	0.00407082	0.10749	106575530	LOC106575530	protein S100-A16-like
gene38502:106577408	76.974	0.760613	0.264765	0.00406875	0.10749	106577408	LOC106577408	uncharacterized LOC106577408
gene23739:106562896	68.2193	-0.839212	0.292314	0.00409274	0.107964	106562896	LOC106562896	mitogen-activated protein kinase kinase kinase 1-like
gene15583:106608612	289.97	0.792138	0.276102	0.00411759	0.108301	106608612	LOC106608612	synaptopodin-2-like
gene21620:106561098	48.0719	-1.14997	0.400808	0.00411595	0.108301	106561098	LOC106561098	lactadherin-like
gene91:106600942	579.851	0.7571	0.263873	0.00411528	0.108301	106600942	LOC106600942	alpha-actinin-1-like
gene10523:106603969	88.9909	0.986974	0.344175	0.00413526	0.108601	106603969	LOC106603969	heart- and neural crest derivatives-expressed protein 1-like
gene16040:106609130	134.841	0.749512	0.261436	0.00414505	0.108601	106609130	LOC106609130	calumenin-A-like
gene23868:106563079	266.916	0.528515	0.18437	0.00414912	0.108601	106563079	LOC106563079	centrin-3
gene3292:106573644	19.7339	-1.33917	0.467019	0.00413762	0.108601	106573644	LOC106573644	zinc finger and BTB domain-containing protein 7B-like
gene48331:106587101	533.568	0.474057	0.165356	0.00414517	0.108601	106587101	ndufs3	NADH:ubiquinone oxidoreductase core subunit S3
gene24290:106563500	1199.27	0.602564	0.210255	0.00415856	0.108743	106563500	LOC106563500	calmodulin
gene1842:106611807	328.365	0.55877	0.195054	0.00417407	0.108834	106611807	LOC106611807	vinculin
gene20974:106613922	160.558	0.794696	0.27744	0.00417818	0.108834	106613922	ect2	epithelial cell transforming 2
gene4804:106586711	25.2558	-1.25847	0.439309	0.00417455	0.108834	106586711	LOC106586711	NACHT, LRR and PYD domains-containing protein 12-like
gene48388:106587150	61.8868	0.840299	0.293273	0.0041668	0.108834	106587150	LOC106587150	MTSS1-like protein
gene4197:100195407	195.527	-0.523606	0.18288	0.00419504	0.109168	100195407	fli1	Friend leukemia integration 1 transcription factor
gene11128:106604453	130.514	-0.633989	0.221469	0.00420106	0.109219	106604453	LOC106604453	protein diaphanous homolog 2-like
gene41696:106580573	48.4177	-1.7788	0.621639	0.00421685	0.109524	106580573	LOC106580573	gamma-glutamyl hydrolase-like
gene27527:106566439	327.317	0.51034	0.178414	0.00423072	0.109779	106566439	LOC106566439	NSFL1 cofactor p47-like
gene50463:106588889	63.918	0.864389	0.302267	0.00424053	0.109928	106588889	LOC106588889	shugoshin-like 1
gene33760:106572606	166.685	0.845676	0.295859	0.00425815	0.110074	106572606	LOC106572606	junctophilin-2-like
gene51684:100196214	417.963	0.616808	0.215766	0.00425392	0.110074	100196214	tyms	thymidylate synthetase
gene9037:106602565	33.5587	-1.33518	0.467115	0.0042584	0.110074	106602565	LOC106602565	zinc finger protein RFP-like
gene15901:106608996	56.9482	-0.860481	0.301187	0.00427709	0.110346	106608996	LOC106608996	kinesin light chain 2-like
gene47056:106585806	82.5653	0.75134	0.262961	0.00427362	0.110346	106585806	LOC106585806	survival motor neuron protein 1-like
gene27642:106566566	3399.18	-0.846409	0.296409	0.00429635	0.110631	106566566	LOC106566566	solute carrier family 26 member 6-like
gene9406:106602856	52.7231	-1.06267	0.372107	0.00429272	0.110631	106602856	LOC106602856	rho guanine nucleotide exchange factor 15-like
gene15925:106609013	33.2195	-1.01827	0.356883	0.00432781	0.111256	106609013	LOC106609013	natural killer cell receptor 2B4-like
gene2837:106569296	3143.45	0.580451	0.203442	0.00432887	0.111256	106569296	LOC106569296	histone H2A.V
gene7357:100195101	1276.37	0.51547	0.180706	0.00433727	0.111366	100195101	phb	prohibitin
gene11302:100286659	103.513	0.848536	0.297608	0.00435569	0.111469	100286659	pmf1	Polyamine-modulated factor 1
gene13828:106607030	264.534	0.477454	0.167445	0.00435258	0.111469	106607030	LOC106607030	thioredoxin, mitochondrial-like
gene17074:106610170	34.4515	1.10987	0.389295	0.00435846	0.111469	106610170	LOC106610170	heart- and neural crest derivatives-expressed protein 2
gene24664:106563818	24.5795	-1.30759	0.458691	0.00436225	0.111469	106563818	LOC106563818	claudin-4-like
gene25210:106564361	18.0382	-1.49416	0.524011	0.00435289	0.111469	106564361	LOC106564361	uncharacterized LOC106564361
gene65834:106592832	59.3565	-0.799107	0.280346	0.00436608	0.111469	106592832	LOC106592832	protein phosphatase 1 regulatory subunit 12A-like
gene36273:100195978	633.874	0.512761	0.179973	0.00438443	0.111726	100195978	hdd1a	Haloacid dehalogenase-like hydrolase domain-containing protein 1A
gene40602:106579452	246.936	-0.634094	0.22255	0.00438256	0.111726	106579452	LOC106579452	SH3 domain-containing kinase-binding protein 1-like
gene28801:106567696	45.7214	0.87992	0.309026	0.00440776	0.112215	106567696	LOC106567696	proline-rich protein 11-like
gene39982:100194820	176.08	-0.611393	0.21477	0.004417	0.112344	100194820	un13d	unc-13 homolog D
gene11398:106604746	467.921	-0.536262	0.188484	0.00443929	0.112805	106604746	LOC106604746	rho guanine nucleotide exchange factor 6-like
gene42935:106581816	54.0869	1.01056	0.355339	0.00445596	0.113122	106581816	LOC106581816	uncharacterized protein C7orf57-like
gene41358:106579862	42.7169	-0.964778	0.339276	0.00446018	0.113123	106579862	LOC106579862	ectonucleoside triphosphate diphosphohydrolase 4-like
gene43422:106582264	45.9339	-0.918306	0.323028	0.00447178	0.113204	106582264	LOC106582264	calcium/calmodulin-dependent 3',5'-cyclic nucleotide phosphodiesterase 1A-like
gene46187:100194590	6821.02	0.688569	0.242209	0.00447096	0.113204	100194590	cirbp	cold inducible RNA binding protein
gene43261:100194950	129.249	-0.73492	0.258612	0.00448618	0.113462	100194950	klhl6	kelch like family member 6
gene19903:106612809	33.022	-1.14373	0.402583	0.00449758	0.113593	106612809	LOC106612809	uncharacterized LOC106612809
gene73:106599381	64.1439	-1.76828	0.622453	0.00449978	0.113593	106599381	LOC106599381	tandem C2 domains nuclear protein-like
gene33565:106572390	57.594	-1.60578	0.565419	0.00451153	0.113677	106572390	LOC106572390	tumor necrosis factor receptor superfamily member 9-like
gene40883:106579772	114.783	-0.8286	0.291762	0.0045115	0.113677	106579772	acaa1	acetyl-CoA acyltransferase 1
gene16163:106609324	423.262	0.456114	0.160641	0.0045208	0.113804	106609324	LOC106609324	sorting and assembly machinery component 50 homolog B-like
gene19354:106612337	174.183	-0.579541	0.204201	0.00453839	0.114034	106612337	LOC106612337	protein atonal homolog 1-like
gene41588:106580457	256.218	-0.510934	0.180023	0.00453742	0.114034	106580457	LOC106580457	autism susceptibility gene 2 protein-like
gene18304:106611357	468.367	0.705646	0.248684	0.00454653	0.114052	106611357	cenpf	centromere protein F
gene38334:106577250	41.1928	-0.962927	0.339364	0.00454755	0.114052	106577250	LOC106577250	transmembrane protein 150A-like
gene33804:106572653	23.8102	-1.25217	0.441364	0.00455331	0.114091	106572653	LOC106572653	nuclear receptor subfamily 1 group D member 1-like
gene17610:106610669	113.451	-0.799159	0.281787	0.00456766	0.114344	106610669	LOC106610669	cathepsin L1-like
gene26023:106565211	118.199	0.729063	0.257201	0.00458821	0.114646	106565211	LOC106565211	rac GTPase-activating protein 1-like
gene51593:106590036	703.816	0.471462	0.166317	0.00458649	0.114646	106590036	LOC106590036	zinc finger CCCH domain-containing protein 15-like
gene17508:106610560	70.2701	0.85701	0.302493	0.00460916	0.114989	106610560	LOC106610560	structural maintenance of chromosomes protein 2-like
gene31849:106570717	22.79	-1.41428	0.499206	0.0046106	0.114989	106570717	LOC106570717	hephaestin-like protein 1
gene33818:106572666	216.616	-0.508706	0.179579	0.00461473	0.114989	106572666	LOC106572666	extended synaptotagmin-1-like
gene43308:100136409	8130.29	0.646779	0.228351	0.00462014	0.115018	100136409	LOC100136409	acyl-CoA-binding protein
gene3281:106573577	175.1	-0.721135	0.254717	0.00463858	0.11537	106573577	LOC106573577	protein Jumonji-like
gene43004:106581758	117.966	1.07351	0.37928	0.00464898	0.115523	106581758	LOC106581758	cell division cycle-associated protein 7-like
gene5760:106597143	82.4784	-0.822184	0.29053	0.00465565	0.115582	106597143	LOC106597143	chromodomain Y-like protein
gene17601:106610660	446.101	-0.583192	0.206339	0.00470775	0.116768	106610660	LOC106610660	ribosomal protein S6 kinase 2 alpha-like
gene6119:106598872	40.2412	-0.994976	0.352131	0.00471943	0.116843	106598872	LOC106598872	CMRF35-like molecule 1
gene6778:106599985	131.274	0.6149	0.217605	0.00471676	0.116843	106599985	LOC106599985	fizzy-related protein homolog
gene36825:106575734	82.5926	-0.715083	0.25316	0.00473353	0.116988	106575734	LOC106575734	T-cell surface glycoprotein CD3 zeta chain-like
gene41009:106580158	28.654	-1.16197	0.411374	0.00473398	0.116988	106580158	LOC106580158	rhotekin-like
gene2261:106563511	146.255	0.867926	0.307463	0.00475967	0.117408	106563511	LOC106563511	protein regulator of cytokinesis 1-like
gene78307:106593935	70.1583	0.774433	0.27432	0.00475619	0.117408	106593935	LOC106593935	AP-5 complex subunit zeta-1-like
gene6301:100380746	602.363	0.404225	0.143225	0.00476779	0.117501	100380746	LOC100380746	eukaryotic translation initiation factor 4 gamma 1
gene40441:100195513	641.688	0.730748	0.259029	0.00478593	0.117841	100195513	lasp1	LIM and SH3 protein 1
gene11309:106604669	45.9019	-0.956242	0.339029	0.00479446	0.117936	106604669	LOC106604669	uncharacterized LOC106604669
gene21858:106560887	112.107	-0.772942	0.274068	0.00479857	0.117936	106560887	LOC106560887	C-Maf-inducing protein-like
gene45161:100195500	19.36	1.35489	0.480529	0.00480868	0.118077	100195500	rnf25	ring finger protein 25
gene5447:106594161	38.6559	-1.3754	0.48802	0.00482744	0.118323	106594161	LOC106594161	cytochrome P450 3A27-like
gene6192:106599005	124.185	-0.68664	0.243615	0.00482416	0.118323	106599005	LOC106599005	phosphatidylinositol 3-kinase regulatory subunit beta-like
gene43815:106582662	81.6571	-0.787963	0.279693	0.00484386	0.118617	106582662	LOC106582662	uncharacterized LOC106582662
gene14625:106607811	79.688	1.0435	0.370491	0.00485469	0.118667	106607811	LOC106607811	lymphokine-activated killer T-cell-originated protein kinase homolog
gene8000:106601629	35.1713	-1.44163	0.511802	0.00485082	0.118667	106601629	LOC106601629	uncharacterized LOC106601629
gene51640:106590096	124.232	0.709184	0.251929	0.00487751	0.119117	106590096	ncapg2	non-SMC condensin II complex subunit G2
gene15789:106608890	36.4033	-1.36159	0.483872	0.00489385	0.119193	106608890	LOC106608890	actin-related protein 2-like
gene18703:106611776	323.843	0.436046	0.154946	0.00489018	0.119193	106611776	LOC106611776	malate synthase-like
gene39209:106578101	180.335	0.735892	0.261475	0.00488713	0.119193	106578101	LOC106578101	rab9 effector protein with kelch motifs-like
gene18345:106611397	1612.09	-0.693343	0.246612	0.00493146	0.12	106611397	LOC106611397	uncharacterized LOC106611397
gene20770:106613744	1351.17	0.494172	0.175875	0.00495746	0.120307	106613744	LOC106613744	ATP synthase subunit delta, mitochondrial-like
gene27581:106566495	2297.91	0.313033	0.111402	0.00495512	0.120307	106566495	bcap31	B-cell receptor associated protein 31
gene37857:106576830	85.0913	1.00334	0.357073	0.00495554	0.120307	106576830	mypn	myopalladin
gene10279:106603726	2162.19	-0.607827	0.216426	0.00497776	0.120691	106603726	LOC106603726	protein PRY2-like
gene43127:106581965	29.1851	-1.24378	0.442912	0.00498222	0.120691	106581965	pou2f1	POU class 2 homeobox 1
gene39199:106578092	101.255	1.43898	0.512601	0.00499717	0.120945	106578092	LOC106578092	uncharacterized LOC106578092
gene41571:106580445	632.128	0.694803	0.247604	0.00501446	0.121146	106580445	LOC106580445	proliferating cell nuclear antigen-like
gene4356:106583830	159.966	0.88357	0.31487	0.00501384	0.121146	106583830	LOC106583830	dual specificity protein kinase Ttk-like
gene17740:106610796	70.669	-0.967124	0.344771	0.00502983	0.121299	106610796	LOC106610796	adenylyltransferase and sulfurtransferase MOCS3-like
gene23593:106562751	87.5513	-1.05727	0.376902	0.00502902	0.121299	106562751	LOC106562751	golgin subfamily B member 1-like
gene33236:100196204	347.168	0.678929	0.242057	0.00503427	0.121299	100196204	ppih	peptidylprolyl isomerase H
gene2051:106561454	93.2629	-0.752428	0.268387	0.00505475	0.121405	106561454	ric1	RIC1 homolog, RAB6A GEF complex partner 1
gene32001:106570854	145.459	-0.732089	0.261168	0.00506085	0.121405	106570854	LOC106570854	phospholipid-transporting ATPase ID-like
gene37292:100196024	335.505	0.692788	0.24715	0.00506118	0.121405	100196024	nudt5	nudix (nucleoside diphosphate linked moiety X)-type motif 5
gene47743:106586507	1885.85	-0.509375	0.181679	0.00505186	0.121405	106586507	LOC106586507	fruit protein pKIWI501-like
gene54733:106598796	108.846	-0.926005	0.330338	0.00505974	0.121405	106598796	LOC106598796	deoxyribonuclease gamma-like
gene39619:100195669	323.289	0.574476	0.205007	0.00507522	0.121558	100195669	rmdn1	regulator of microtubule dynamics 1
gene41507:106580280	86.486	-0.803759	0.286838	0.00507654	0.121558	106580280	LOC106580280	SET-binding protein-like
gene13069:106606416	99.3301	0.89875	0.321037	0.0051178	0.122306	106606416	LOC106606416	cyclin-F-like
gene39154:100195267	338.09	0.695685	0.248496	0.00511683	0.122306	100195267	ccnb3	cyclin B3
gene45029:106583791	522.741	-0.818887	0.292533	0.00512138	0.122306	106583791	hrh1	histamine receptor H1
gene42202:106581054	1282.27	0.5455	0.194926	0.00513416	0.122503	106581054	LOC106581054	T-complex protein 1 subunit zeta-like
gene58288:106594036	87.1612	-0.760602	0.271876	0.00514831	0.122732	106594036	LOC106594036	transmembrane protein 116-like
gene17230:100194745	2706.19	0.415981	0.148732	0.00516047	0.122913	100194745	loxe3	Epidermis-type lipoxygenase 3
gene10065:106603510	37.7058	-0.926098	0.331216	0.00517308	0.123105	106603510	LOC106603510	cytospin-B-like
gene12118:106605410	78.8032	0.705093	0.252245	0.0051856	0.123294	106605410	ino80e	INO80 complex subunit E
gene25693:106564893	59.575	-1.25811	0.450187	0.00519591	0.123322	106564893	LOC106564893	E3 SUMO-protein ligase CBX4-like
gene46299:106585156	160.705	-0.72101	0.25798	0.00519261	0.123322	106585156	LOC106585156	dedicator of cytokinesis protein 8-like
gene23134:106562299	120.094	-1.02308	0.366266	0.00521758	0.123322	106562299	LOC106562299	transcription factor Maf-like
gene24344:106563450	131.784	0.857739	0.307031	0.00521155	0.123322	106563450	LOC106563450	sodium/potassium/calcium exchanger 3-like
gene34872:106573602	417.461	0.577242	0.206657	0.00521821	0.123322	106573602	LOC106573602	ATP synthase subunit delta, mitochondrial-like
gene40818:106579710	276.54	1.06079	0.379773	0.00521879	0.123322	106579710	LOC106579710	decaprenyl-diphosphate synthase subunit 1-like
gene9861:106603326	146.837	0.898182	0.321518	0.005213	0.123322	106603326	LOC106603326	SH3 domain-binding glutamic acid-rich-like protein
gene16392:106609503	58.0167	0.954272	0.34183	0.00524387	0.12376	106609503	LOC106609503	forkhead box protein M1-like
gene35724:106574634	893.831	-0.556739	0.199441	0.00524649	0.12376	106574634	LOC106574634	uncharacterized protein KIAA1211-like
gene36501:106575419	74.8116	1.04448	0.374381	0.0052729	0.124166	106575419	LOC106575419	neutral cholesterol ester hydrolase 1-like
gene9538:106602975	20.443	1.79316	0.642708	0.00527074	0.124166	106602975	LOC106602975	endosialin-like
gene37995:100380298	341.322	-0.576603	0.206729	0.00528436	0.124278	100380298	nfkb2	nuclear factor of kappa light polypeptide gene enhancer in B-cells 2, p49/p100
gene47683:106586452	248.769	-0.593522	0.212807	0.00528687	0.124278	106586452	slc12a8	solute carrier family 12 member 8
gene25681:106564903	349.4	-0.430142	0.154424	0.0053451	0.125429	106564903	LOC106564903	E3 ubiquitin-protein ligase SMURF2-like
gene8054:106601689	427.589	0.836335	0.300231	0.00534222	0.125429	106601689	LOC106601689	beta-galactoside-binding lectin-like
gene18202:100195811	593.139	0.572025	0.205418	0.00535808	0.125624	100195811	vrk1	vaccinia related kinase 1
gene14244:100286406	2134.56	0.835758	0.300282	0.00538181	0.125904	100286406	LOC100286406	collagen alpha-1(I) chain
gene2536:106566762	287.939	-0.66636	0.239454	0.00538868	0.125904	106566762	traf2	TNF receptor associated factor 2
gene30629:106569513	32.5299	-1.13124	0.406409	0.00537769	0.125904	106569513	LOC106569513	receptor-type tyrosine-protein phosphatase S-like
gene39423:106578327	2875.19	0.42175	0.15155	0.00538749	0.125904	106578327	LOC106578327	eukaryotic translation initiation factor 3 subunit C
gene49047:106587818	39.1502	-1.25004	0.449718	0.00544232	0.127027	106587818	LOC106587818	abhydrolase domain-containing protein 2-A-like
gene50404:106588829	117.475	-0.590739	0.21256	0.00544995	0.127027	106588829	LOC106588829	pro-interleukin-16-like
gene624:106599317	206.53	-0.537858	0.193536	0.00545088	0.127027	106599317	mark3	microtubule affinity regulating kinase 3
gene32299:106571118	54.6586	-0.86983	0.313057	0.00546106	0.127045	106571118	LOC106571118	protein LBH-like
gene47954:106586703	291.78	0.558627	0.201052	0.00546064	0.127045	106586703	cmss1	cms1 ribosomal small subunit homolog (yeast)
gene50989:106589471	267.797	-0.619065	0.223	0.00550191	0.127805	106589471	LOC106589471	protein unc-13 homolog D-like
gene78633:100380611	1222.48	-0.542303	0.195354	0.00550318	0.127805	100380611	arc1b	Actin-related protein 2/3 complex subunit 1B
gene21331:106560513	124.294	0.747368	0.269285	0.00551367	0.127938	106560513	orc1	origin recognition complex subunit 1
gene69679:106594008	37.4662	0.9649	0.347931	0.00554989	0.128668	106594008	LOC106594008	maternal embryonic leucine zipper kinase-like
gene48162:106586921	769.333	0.539535	0.194584	0.00555841	0.128755	106586921	LOC106586921	tubulin alpha chain-like
gene38496:106577402	44.7123	1.45613	0.525235	0.00556563	0.128811	106577402	LOC106577402	DNA-directed RNA polymerase III subunit RPC4-like
gene22677:106561841	63.3871	0.814485	0.293942	0.00559012	0.129157	106561841	kif23	kinesin family member 23
gene9896:106603358	60.2796	0.926447	0.334342	0.00558918	0.129157	106603358	LOC106603358	tubulin polymerization-promoting protein family member 3-like
gene25577:106564730	49.6654	1.77019	0.639655	0.00565032	0.130102	106564730	LOC106564730	actin, alpha skeletal muscle 2-like
gene30763:106569646	280.495	-0.937677	0.338794	0.00564543	0.130102	106569646	LOC106569646	kelch-like protein 24
gene42045:106580875	95.9859	-0.978129	0.353348	0.00563709	0.130102	106580875	rasa2	RAS p21 protein activator 2
gene7130:106600951	1592.88	0.851232	0.307574	0.0056476	0.130102	106600951	LOC106600951	ferritin, middle subunit
gene10490:106603936	459.303	-0.572213	0.206823	0.00566291	0.13017	106603936	LOC106603936	P2X purinoceptor 1-like
gene28971:106567917	3517.35	0.551533	0.199345	0.00566226	0.13017	106567917	LOC106567917	non-histone chromosomal protein HMG-14-like
gene19210:106612199	158.652	0.581523	0.210274	0.0056826	0.130373	106612199	LOC106612199	sterol-4-alpha-carboxylate 3-dehydrogenase, decarboxylating-like
gene48280:106587052	100.275	-0.801873	0.289942	0.00568118	0.130373	106587052	LOC106587052	uncharacterized LOC106587052
gene49707:106588243	488.001	0.66722	0.241279	0.00568626	0.130373	106588243	LOC106588243	mitochondrial import receptor subunit TOM40 homolog
gene14079:106607332	332.323	-0.581305	0.210249	0.00569514	0.130397	106607332	LOC106607332	beta-1,3-N-acetylglucosaminyltransferase lunatic fringe-like
gene20493:106613497	361.856	0.524711	0.189806	0.00570179	0.130397	106613497	LOC106613497	39S ribosomal protein L47, mitochondrial-like
gene7838:106601466	329.023	-0.722765	0.261445	0.00570102	0.130397	106601466	LOC106601466	ras-related C3 botulinum toxin substrate 2-like
gene6973:106600646	196.844	0.531116	0.192145	0.00570723	0.130411	106600646	fam173a	family with sequence similarity 173 member A
gene48024:106586746	662.571	0.486619	0.176072	0.00571414	0.130458	106586746	LOC106586746	mitochondrial pyruvate carrier 2-like
gene19631:100194773	40.4142	1.13231	0.40977	0.00572237	0.130536	100194773	neum	Neuromodulin
gene18984:106611981	22.3723	-1.22292	0.442652	0.00573248	0.130546	106611981	LOC106611981	mitogen-activated protein kinase kinase kinase kinase 4-like
gene44651:106583488	46.2503	-0.970781	0.35138	0.00573137	0.130546	106583488	LOC106583488	cryptochrome-1-like
gene17806:100195041	540.614	0.591671	0.214286	0.00576023	0.131067	100195041	rbbp4	Histone-binding protein RBBP4
gene23835:106562980	17.98	-4.79911	1.7387	0.00577711	0.13134	106562980	LOC106562980	G protein-coupled receptor kinase 5-like
gene9006:106602580	904.773	0.336745	0.12203	0.00578841	0.131487	106602580	LOC106602580	NADH dehydrogenase [ubiquinone] iron-sulfur protein 8, mitochondrial-like
gene32072:106570933	664.732	0.504402	0.182811	0.00579533	0.131533	106570933	LOC106570933	activated RNA polymerase II transcriptional coactivator p15-like
gene11155:106604553	132.241	-0.725024	0.262962	0.00583088	0.132038	106604553	LOC106604553	SAM and SH3 domain-containing protein 3-like
gene32047:106570908	512.506	-0.585967	0.212514	0.00582791	0.132038	106570908	LOC106570908	uncharacterized LOC106570908
gene34975:106573846	80.6202	1.09318	0.3965	0.00583226	0.132038	106573846	LOC106573846	tubulin alpha-1A chain-like
gene8839:106602441	90.0516	0.840444	0.304954	0.00585195	0.132373	106602441	LOC106602441	deoxycytidylate deaminase-like
gene50889:106589381	173.437	0.734745	0.266675	0.00586543	0.132566	106589381	LOC106589381	kinesin-like protein KIF20A
gene49105:106587883	1030.08	0.401539	0.145766	0.00587492	0.13267	106587883	LOC106587883	LDLR chaperone MESD-like
gene47442:106586211	168.003	0.65179	0.236659	0.00588478	0.132782	106586211	LOC106586211	D-3-phosphoglycerate dehydrogenase-like
gene46378:100195017	895.556	0.591533	0.214829	0.00589613	0.132919	100195017	ranbp1	RAN binding protein 1
gene46425:106584926	44.7919	0.881677	0.320232	0.00590075	0.132919	106584926	LOC106584926	cell division control protein 45 homolog
gene46123:106584853	233.26	-0.544127	0.197702	0.00591871	0.133213	106584853	LOC106584853	death-associated protein kinase 2-like
gene40522:106579408	288.572	-0.45844	0.166636	0.00593879	0.133554	106579408	LOC106579408	integrin alpha-X-like
gene12248:106605587	95.5104	-0.956339	0.347657	0.00594479	0.133555	106605587	LOC106605587	rho GTPase-activating protein 33-like
gene27350:100195457	875.05	0.460088	0.167268	0.00594875	0.133555	100195457	adrm1	ADRM1 protein
gene627:100195225	126.368	-0.709119	0.257859	0.00595897	0.133673	100195225	tnfaip2	TNF alpha induced protein 2
gene48766:106587534	28.3499	-1.13474	0.412809	0.00598104	0.134057	106587534	LOC106587534	ras-related protein R-Ras2
gene30940:106569814	42.6312	-1.10562	0.4023	0.00599142	0.134178	106569814	LOC106569814	guanine nucleotide exchange factor VAV3-like
gene29629:106568551	19.1204	1.28512	0.467773	0.00600851	0.134449	106568551	LOC106568551	uncharacterized LOC106568551
gene31254:106569895	148.677	0.700264	0.254945	0.00601941	0.134481	106569895	LOC106569895	T-complex protein 1 subunit gamma-like
gene68539:106594075	998.658	0.458437	0.166905	0.0060199	0.134481	106594075	lrpap1	LDL receptor related protein associated protein 1
gene32501:106571350	25.2491	1.20686	0.439591	0.00604325	0.134668	106571350	LOC106571350	DBH-like monooxygenase protein 1 homolog
gene44457:100380681	1769.56	0.438452	0.159689	0.00603901	0.134668	100380681	LOC100380681	tubulin alpha-1C chain
gene47023:106585766	1776.38	0.449331	0.163633	0.00603342	0.134668	106585766	LOC106585766	cytochrome c oxidase subunit 7C, mitochondrial-like
gene3081:106572043	412.486	-0.819634	0.298632	0.0060579	0.134883	106572043	LOC106572043	E3 ubiquitin-protein ligase RNF213-like
gene23243:106562395	30.602	-0.961781	0.350635	0.0060886	0.135343	106562395	LOC106562395	retinoblastoma-like protein 2
gene31869:106570733	66.046	-1.27187	0.463663	0.00608622	0.135343	106570733	LOC106570733	FH1/FH2 domain-containing protein 3-like
gene11733:106605090	309.552	0.735084	0.268188	0.00612654	0.135963	106605090	LOC106605090	cell division cycle-associated protein 3-like
gene20152:100194973	362.507	0.582889	0.212653	0.00612454	0.135963	100194973	ilk	integrin linked kinase
gene19060:106612046	1563.17	0.342749	0.125074	0.00613689	0.136081	106612046	hprt1	hypoxanthine phosphoribosyltransferase 1
gene5966:106597294	2610.44	0.529465	0.193244	0.00614623	0.136176	106597294	LOC106597294	collagen alpha-1(VI) chain-like
gene41109:106580076	175.589	0.944285	0.344744	0.00616092	0.136389	106580076	LOC106580076	calphotin-like
gene7423:100196003	48.5636	1.06211	0.388136	0.00621069	0.137378	100196003	hop2	Homologous-pairing protein 2 homolog
gene51565:106590008	124.584	0.634595	0.231963	0.0062236	0.137551	106590008	LOC106590008	39S ribosomal protein L2, mitochondrial-like
gene17629:106610683	105.832	0.715888	0.261884	0.00626458	0.138118	106610683	tonsl	tonsoku like, DNA repair protein
gene34977:100196438	401.168	0.710348	0.259834	0.0062598	0.138118	100196438	tba1a	Tubulin alpha-1A chain
gene36456:100306817	650.57	0.565451	0.206849	0.00626386	0.138118	100306817	ola1	Obg-like ATPase 1
gene42426:106581280	30.494	-1.37428	0.502862	0.00627747	0.138128	106581280	LOC106581280	V-set and transmembrane domain-containing protein 5-like
gene45984:106584720	357.171	0.417148	0.152646	0.00628042	0.138128	106584720	LOC106584720	CTD small phosphatase-like protein 2-A
gene48411:100195709	19.776	-1.4898	0.545149	0.0062791	0.138128	100195709	pkhf1	Pleckstrin homology domain-containing family F member 1
gene19079:106612067	1145.8	-0.364409	0.133367	0.00628779	0.138178	106612067	LOC106612067	MORC family CW-type zinc finger protein 3-like
gene28937:106568047	84.571	0.838664	0.307053	0.0063079	0.138507	106568047	LOC106568047	uromodulin-like 1
gene34012:106572865	207.954	-0.894715	0.327665	0.00632242	0.138713	106572865	LOC106572865	sortilin-like
gene70863:106594621	48.8866	-1.04556	0.382971	0.00633074	0.138783	106594621	LOC106594621	trinucleotide repeat-containing gene 6A protein-like
gene30967:106569842	158.558	-0.816164	0.299022	0.00634415	0.138851	106569842	LOC106569842	BOLA class I histocompatibility antigen, alpha chain BL3-7-like
gene37014:106575927	42.8316	-0.937142	0.343332	0.00634205	0.138851	106575927	LOC106575927	LIM domain only protein 7-like
gene32602:106571422	99.6515	0.807842	0.296193	0.00638324	0.13957	106571422	nsl1	NSL1, MIS12 kinetochore complex component
gene78477:106591335	25.5854	-1.41964	0.520546	0.00638734	0.13957	106591335	LOC106591335	uncharacterized LOC106591335
gene36278:106575196	23.3729	-1.40468	0.515195	0.00640105	0.139756	106575196	LOC106575196	anosmin-1-like
gene14214:106607495	42.978	0.968865	0.355412	0.00641	0.139839	106607495	LOC106607495	uncharacterized LOC106607495
gene17758:106610810	281.316	0.604936	0.222028	0.00643818	0.14034	106610810	LOC106610810	polyadenylate-binding protein 4-like
gene56886:106592653	59.5754	0.900847	0.330715	0.00645079	0.140501	106592653	LOC106592653	uncharacterized LOC106592653
gene42110:106580961	75.8458	-1.31235	0.481831	0.00645601	0.140501	106580961	LOC106580961	high affinity immunoglobulin gamma Fc receptor I-like
gene9104:106602677	43.2836	1.37901	0.506475	0.00647373	0.140774	106602677	LOC106602677	uncharacterized LOC106602677
gene39105:106577993	71.9113	-0.765919	0.281355	0.00648377	0.140878	106577993	LOC106577993	uncharacterized LOC106577993
gene20390:100196002	1278.73	0.530521	0.194983	0.00651122	0.141247	100196002	psmd8	proteasome 26S subunit, non-ATPase 8
gene51311:106589755	20.678	1.19812	0.440309	0.00650659	0.141247	106589755	LOC106589755	MARVEL domain-containing protein 1-like
gene18788:106611720	185.406	1.00567	0.369718	0.00652616	0.141325	106611720	LOC106611720	four and a half LIM domains protein 1-like
gene36241:106575225	832.136	0.561112	0.206303	0.00653123	0.141325	106575225	LOC106575225	basic leucine zipper and W2 domain-containing protein 1-A
gene3871:106579099	217.201	-0.791664	0.291094	0.00653573	0.141325	106579099	LOC106579099	E3 ubiquitin-protein ligase RNF144B-like
gene41855:106580687	216.004	0.519414	0.190974	0.00653194	0.141325	106580687	LOC106580687	eukaryotic translation initiation factor 4 gamma 1-like
gene16570:106609656	420.296	0.428666	0.157659	0.00654898	0.141487	106609656	LOC106609656	staphylococcal nuclease domain-containing protein 1-like
gene4879:106589071	4790.83	0.74397	0.273648	0.0065537	0.141487	106589071	LOC106589071	myosin-11-like
gene45945:106584644	53.7331	0.849044	0.312398	0.00657122	0.141751	106584644	LOC106584644	microtubule-associated protein 1B-like
gene15564:106608627	69.1358	-0.67097	0.246942	0.00658543	0.141908	106608627	LOC106608627	NXPE family member 3-like
gene42345:106581107	210.533	0.820541	0.30201	0.006589	0.141908	106581107	LOC106581107	small nuclear ribonucleoprotein Sm D2
gene19027:100194858	1044.52	0.332303	0.122343	0.00660429	0.142011	100194858	abhd18	abhydrolase domain containing 18
gene238:106562077	25.1378	-1.54441	0.568562	0.00660072	0.142011	106562077	LOC106562077	peroxidasin homolog
gene26662:106565839	271.298	0.4837	0.178114	0.00661414	0.142051	106565839	slc25a26	solute carrier family 25 member 26
gene41605:106580490	72.8785	0.845203	0.311246	0.00661667	0.142051	106580490	LOC106580490	cell division cycle-associated protein 2-like
gene2317:106564143	501.943	0.484439	0.17845	0.00663342	0.142297	106564143	LOC106564143	ankyrin repeat and LEM domain-containing protein 2-like
gene36604:106575518	49.4391	-0.948069	0.34935	0.0066515	0.142571	106575518	LOC106575518	probable phospholipid-transporting ATPase IH
gene29143:100195771	252.158	-0.544708	0.200746	0.00665915	0.142575	100195771	rn133	RING finger protein 133
gene54426:106594657	127.611	0.653782	0.240957	0.00666221	0.142575	106594657	LOC106594657	propionyl-CoA carboxylase alpha chain, mitochondrial-like
gene22759:106561914	2128.38	-0.645911	0.238313	0.00672117	0.142767	106561914	LOC106561914	kinesin-like protein KIFC3
gene24489:106563646	104.669	-0.668792	0.246571	0.00668038	0.142767	106563646	LOC106563646	cell surface glycoprotein 1-like
gene26972:106566021	329.805	0.76632	0.28278	0.00672939	0.142767	106566021	LOC106566021	protein phosphatase 1 regulatory subunit 12B-like
gene29122:106567787	193.807	0.759823	0.28029	0.00671114	0.142767	106567787	LOC106567787	rho GTPase-activating protein 20-like
gene37496:106576438	962.558	-0.57865	0.213465	0.0067131	0.142767	106576438	LOC106576438	normal mucosa of esophagus-specific gene 1 protein-like
gene39546:106578433	166.994	0.481116	0.17739	0.00668387	0.142767	106578433	timm21	translocase of inner mitochondrial membrane 21
gene4222:106582601	82.6816	-0.907707	0.334848	0.00671207	0.142767	106582601	LOC106582601	pleckstrin homology-like domain family B member 3
gene43478:106582352	65.438	-0.794228	0.293003	0.00671509	0.142767	106582352	LOC106582352	solute carrier family 15 member 2-like
gene50458:106588869	25.7863	-1.95468	0.721166	0.00671919	0.142767	106588869	LOC106588869	complement C1q-like protein 2
gene52072:106590533	40.4045	-1.01731	0.375364	0.00672433	0.142767	106590533	pip4k2a	phosphatidylinositol-5-phosphate 4-kinase type 2 alpha
gene71065:106595200	105.802	-0.979174	0.361124	0.00669862	0.142767	106595200	LOC106595200	uncharacterized LOC106595200
gene3494:106575371	225.732	-0.605773	0.223612	0.00674783	0.143045	106575371	LOC106575371	phosphatidylinositol 4-phosphate 5-kinase type-1 alpha-like
gene47601:106586369	2119.48	0.43518	0.160707	0.00677093	0.143423	106586369	LOC106586369	60 kDa heat shock protein, mitochondrial
gene15407:106608519	186.794	-0.592475	0.218838	0.00678193	0.143495	106608519	paqr9	progestin and adipoQ receptor family member 9
gene2064:106561529	158.45	0.712327	0.263122	0.006785	0.143495	106561529	lcn2	lipocalin 2
gene50938:100136404	832.503	0.540587	0.199752	0.00680401	0.14356	100136404	LOC100136404	glutamate dehydrogenase, mitochondrial
gene70854:106594214	22.2303	-1.99332	0.736471	0.00679802	0.14356	106594214	LOC106594214	uncharacterized LOC106594214
gene726:106601584	505.636	0.717245	0.265015	0.00680103	0.14356	106601584	LOC106601584	fermitin family homolog 2
gene11966:106605328	498.394	-0.641396	0.237151	0.00683884	0.144182	106605328	LOC106605328	cathepsin S-like
gene28966:106567922	4866.26	-0.421276	0.155804	0.00685337	0.144279	106567922	tmprss2	transmembrane protease, serine 2
gene40887:106579773	1066.97	0.634864	0.2348	0.00685412	0.144279	106579773	gars	glycyl-tRNA synthetase
gene48020:106586750	25.6945	1.11817	0.413653	0.0068683	0.144461	106586750	LOC106586750	NADP-dependent malic enzyme, mitochondrial-like
gene6673:106600345	74.8965	0.710265	0.262778	0.00687349	0.144461	106600345	LOC106600345	heterogeneous nuclear ribonucleoprotein C-like
gene29112:106567798	34.8364	-1.03089	0.381485	0.00688608	0.144613	106567798	LOC106567798	GRB2-associated-binding protein 3-like
gene16836:100195616	174.019	0.835519	0.309223	0.00689242	0.144634	100195616	pdli3	PDZ and LIM domain protein 3
gene21462:106560654	90.5952	0.639771	0.237007	0.00694704	0.145234	106560654	LOC106560654	14 kDa phosphohistidine phosphatase-like
gene29417:106568316	147.194	0.583251	0.216013	0.00693245	0.145234	106568316	LOC106568316	mitotic-spindle organizing protein 2-like
gene32361:106571205	68.5868	-0.802334	0.297262	0.0069531	0.145234	106571205	tagap	T-cell activation RhoGTPase activating protein
gene3780:100141317	181.135	-0.554512	0.205446	0.00695333	0.145234	100141317	fxyd5a	FXYD domain containing ion transport regulator 5a
gene38245:106577108	190.08	-0.664086	0.246028	0.00695011	0.145234	106577108	bcl2l11	BCL2 like 11
gene38808:106577670	17.7829	-1.53506	0.568569	0.00693688	0.145234	106577670	LOC106577670	uncharacterized LOC106577670
gene44176:106582993	886.748	0.429764	0.159248	0.00696094	0.145281	106582993	LOC106582993	heterochromatin protein 1-binding protein 3-like
gene28883:106568000	66.0807	0.692288	0.256594	0.00697587	0.14548	106568000	LOC106568000	delta-sarcoglycan-like
gene34618:100194639	1949.57	0.318975	0.118286	0.00700396	0.145953	100194639	idhp	isocitrate dehydrogenase 2-1 (NADP+), mitochondrial
gene4677:106587881	65.5526	-0.832688	0.308829	0.00701192	0.146006	106587881	LOC106587881	zinc finger protein Aiolos-like
gene10120:106603463	68.0949	0.769607	0.285473	0.00701988	0.146059	106603463	rad51c	RAD51 paralog C
gene49648:106588197	49.0814	-0.849527	0.315177	0.0070306	0.146169	106588197	LOC106588197	eomesodermin-like
gene15461:100195682	285.646	0.489001	0.18148	0.00704924	0.146219	100195682	md2l1	Mitotic spindle assembly checkpoint protein MAD2A
gene24880:106564013	811.431	0.471052	0.174791	0.00703998	0.146219	106564013	LOC106564013	eukaryotic translation initiation factor 3 subunit B-like
gene74879:100380612	16.8336	-1.30728	0.485157	0.00704828	0.146219	100380612	zdh11	Probable palmitoyltransferase ZDHHC11
gene28281:100380432	657.051	-0.609894	0.226379	0.00705727	0.146273	100380432	ptn12	Tyrosine-protein phosphatase non-receptor type 12
gene19679:106612602	1300.66	0.507701	0.188466	0.00706315	0.146282	106612602	LOC106612602	calpain-9-like
gene11024:106604383	21.8215	1.14074	0.423798	0.00710894	0.147118	106604383	LOC106604383	uncharacterized LOC106604383
gene7289:106600830	2197.82	0.53441	0.198612	0.00712976	0.147436	106600830	LOC106600830	ATP synthase F(0) complex subunit C3, mitochondrial-like
gene37384:106576277	56.2806	1.08956	0.40526	0.00717641	0.148287	106576277	LOC106576277	PCNA-interacting partner-like
gene48981:106587746	62.9397	-1.50828	0.56143	0.00722057	0.149085	106587746	LOC106587746	inositol hexakisphosphate and diphosphoinositol-pentakisphosphate kinase 2-like
gene24860:100286540	104.156	0.673913	0.250887	0.00722861	0.149137	100286540	arc1a	Actin-related protein 2/3 complex subunit 1A
gene27747:106566630	117.531	0.765356	0.285006	0.00724428	0.149346	106566630	mrps25	mitochondrial ribosomal protein S25
gene33735:106572633	78.2648	-0.667105	0.248479	0.00725827	0.14952	106572633	LOC106572633	zinc finger protein 217-like
gene26982:106566011	108.758	-0.650948	0.242491	0.00726568	0.149559	106566011	LOC106566011	SAM pointed domain-containing Ets transcription factor-like
gene33800:100194439	65.5627	-0.881948	0.328582	0.00727245	0.149584	100194439	hoxc13ab	homeobox protein HoxC13ab
gene24342:106563451	88.1159	-0.598762	0.223127	0.00728551	0.149739	106563451	LOC106563451	signal-induced proliferation-associated protein 1-like
gene39898:106578806	18.5085	-1.22812	0.457712	0.00729255	0.149769	106578806	LOC106578806	uncharacterized LOC106578806
gene8819:106602392	37.8424	-0.914487	0.340866	0.00730019	0.149812	106602392	LOC106602392	transmembrane protein 154-like
gene51931:106590429	294.334	-0.403594	0.150465	0.00731166	0.149934	106590429	LOC106590429	histone-lysine N-methyltransferase 2C-like
gene23490:106562635	20.4627	1.2804	0.477427	0.00732081	0.149949	106562635	rasl12	RAS like family 12
gene30431:106569333	27.7077	-0.968543	0.361227	0.00733463	0.149949	106569333	LOC106569333	atypical chemokine receptor 2-like
gene38404:106577307	201.301	-1.07809	0.402032	0.00732716	0.149949	106577307	LOC106577307	cytochrome P450 26A1-like
gene48720:106587480	125.104	-0.785426	0.292905	0.00732922	0.149949	106587480	LOC106587480	transcription factor PU.1-like
gene21848:106560897	184.393	0.595894	0.222271	0.00734173	0.14998	106560897	fanca	Fanconi anemia complementation group A
gene22899:106562063	434.964	0.466325	0.174021	0.00736888	0.150195	106562063	LOC106562063	adenine phosphoribosyltransferase-like
gene46937:100196218	68.2661	-1.14391	0.426879	0.00736893	0.150195	100196218	glrx1	Glutaredoxin-1
gene47358:106586131	144.82	-0.643157	0.239983	0.00736185	0.150195	106586131	LOC106586131	toll-like receptor 13
gene3620:106576951	16.5044	-1.32476	0.494502	0.00738449	0.150326	106576951	LOC106576951	uncharacterized LOC106576951
gene9701:106603147	1118.54	0.608597	0.227182	0.00738649	0.150326	106603147	LOC106603147	barrier-to-autointegration factor
gene33034:106571865	139.543	-0.784004	0.292704	0.00739543	0.150335	106571865	LOC106571865	membrane-associated guanylate kinase, WW and PDZ domain-containing protein 1-like
gene34182:106573035	88.5502	1.1012	0.411144	0.00739808	0.150335	106573035	LOC106573035	uncharacterized LOC106573035
gene1793:106612239	86.4458	0.671789	0.250915	0.0074207	0.150681	106612239	LOC106612239	39S ribosomal protein L27, mitochondrial-like
gene17077:106610172	769.942	-0.4912	0.18357	0.00745465	0.151021	106610172	LOC106610172	N-acetylgalactosaminyltransferase 7-like
gene2773:106568716	30.4761	1.01478	0.379232	0.00745303	0.151021	106568716	LOC106568716	microtubule-associated protein 1B-like
gene2968:106570938	745.536	0.580144	0.21677	0.00744375	0.151021	106570938	psmb7	proteasome subunit beta 7
gene49049:106587820	29.5891	-1.11909	0.41831	0.007467	0.151021	106587820	LOC106587820	protein CDKN2AIP homolog A-like
gene5696:106596416	85.5912	-1.03991	0.388729	0.00746933	0.151021	106596416	LOC106596416	ZZ-type zinc finger-containing protein 3-like
gene6861:106600603	3201.7	-0.917404	0.342944	0.00747103	0.151021	106600603	LOC106600603	uncharacterized LOC106600603
gene10003:106603561	4517.37	0.480849	0.179832	0.00749789	0.151262	106603561	LOC106603561	non-histone chromosomal protein HMG-14-like
gene12340:106605691	510.391	-0.921139	0.34457	0.00751096	0.151262	106605691	LOC106605691	apolipoprotein A-IV-like
gene20166:106613157	309.447	-0.725024	0.271123	0.00749187	0.151262	106613157	LOC106613157	stonustoxin subunit beta-like
gene20882:100380684	250.419	-0.735869	0.275239	0.007505	0.151262	100380684	LOC100380684	unconventional myosin-If
gene36747:106575664	127.023	0.605214	0.22639	0.00751043	0.151262	106575664	LOC106575664	ubiquitin-protein ligase E3A-like
gene47079:106585831	1334.17	-0.951055	0.35591	0.00753608	0.151655	106585831	mpeg1	macrophage expressed 1
gene18818:106611697	363.163	0.569972	0.213411	0.00756778	0.151839	106611697	LOC106611697	mitochondrial import receptor subunit TOM5 homolog
gene18879:106611908	84.9027	0.981751	0.367588	0.0075672	0.151839	106611908	LOC106611908	Kv channel-interacting protein 1-like
gene35819:106574734	234.24	0.792988	0.296855	0.0075558	0.151839	106574734	LOC106574734	vacuolar protein sorting-associated protein 16 homolog
gene43592:106582434	805.525	0.407007	0.152367	0.00755746	0.151839	106582434	LOC106582434	NADH dehydrogenase [ubiquinone] 1 alpha subcomplex subunit 10, mitochondrial-like
gene19070:106612053	183.616	0.639432	0.239456	0.00757722	0.151883	106612053	hmmr	hyaluronan mediated motility receptor
gene51805:106590301	79.7899	0.796502	0.298296	0.00758122	0.151883	106590301	LOC106590301	serine/threonine-protein kinase greatwall-like
gene12389:106605740	253.902	-0.693748	0.259916	0.00760484	0.152131	106605740	LOC106605740	pyruvate kinase PKM-like
gene42432:106581294	433.782	-0.612197	0.229356	0.00760329	0.152131	106581294	LOC106581294	solute carrier family 12 member 9-like
gene45640:100196515	114.262	-0.725481	0.271908	0.00762794	0.15248	100196515	lpxn	Leupaxin
gene42306:106581144	280.882	-0.704274	0.264072	0.00765368	0.152881	106581144	LOC106581144	uncharacterized LOC106581144
gene42877:106581859	245.099	-0.480833	0.180341	0.00767048	0.153103	106581859	LOC106581859	integrin beta-2-like
gene55356:106591024	29.7797	1.0508	0.394169	0.00767899	0.15316	106591024	LOC106591024	alpha-actinin-1-like
gene16790:106609880	269.309	-0.629912	0.236395	0.00770654	0.153482	106609880	LOC106609880	ATP-binding cassette sub-family A member 1-like
gene6860:106600604	22.7484	-1.13354	0.42538	0.00770431	0.153482	106600604	LOC106600604	zinc finger E-box-binding homeobox 1-like
gene40841:106579730	40.0375	1.04418	0.391946	0.00771951	0.153627	106579730	terf1	telomeric repeat binding factor 1
gene20611:106613599	377.189	0.56251	0.211233	0.00774502	0.153795	106613599	LOC106613599	thimet oligopeptidase-like
gene20768:106613741	7946.19	0.428325	0.160825	0.00773771	0.153795	106613741	LOC106613741	cold-inducible RNA-binding protein B-like
gene275:106565365	85.9016	-0.702397	0.263746	0.00774123	0.153795	106565365	LOC106565365	unconventional myosin-VI-like
gene17720:106610773	67.8368	1.44674	0.543522	0.00777292	0.154235	106610773	LOC106610773	collagen alpha-1(XII) chain-like
gene41433:106580347	1393.49	0.770557	0.289617	0.00780005	0.15466	106580347	LOC106580347	smoothelin-like
gene45258:100196728	607.498	0.562934	0.211657	0.00782216	0.154984	100196728	ebp2	Probable rRNA-processing protein EBP2
gene46995:106585631	37.4609	-1.13669	0.427435	0.00782943	0.155015	106585631	LOC106585631	caspase recruitment domain-containing protein 9-like
gene37986:106576720	28.3244	1.86061	0.69975	0.00783804	0.155071	106576720	LOC106576720	barrier-to-autointegration factor-like protein
gene11212:106604565	53.1411	-0.8651	0.32543	0.00785295	0.155253	106604565	LOC106604565	E3 ubiquitin-protein ligase RNF130-like
gene47388:106586155	295.019	-0.621502	0.233821	0.00785996	0.155277	106586155	LOC106586155	protein FEV-like
gene10459:106603908	46.0346	-1.04917	0.394835	0.00787818	0.155523	106603908	LOC106603908	hepatitis A virus cellular receptor 1 homolog
gene11751:106605109	235.077	0.693365	0.261121	0.00792294	0.156033	106605109	LOC106605109	replication protein A 32 kDa subunit-like
gene27923:106566869	18.2596	-1.50856	0.568059	0.00791602	0.156033	106566869	LOC106566869	anoctamin-7-like
gene32069:106570930	186.719	-0.523989	0.197315	0.00791687	0.156033	106570930	LOC106570930	poly [ADP-ribose] polymerase 8-like
gene52331:106600344	64.9407	-0.813263	0.306296	0.00792711	0.156033	106600344	LOC106600344	protein unc-93 homolog B1-like
gene4760:106586503	28.7347	-2.29877	0.866036	0.00794587	0.156288	106586503	LOC106586503	uncharacterized LOC106586503
gene34289:106573119	295.271	0.637657	0.240297	0.00796324	0.156516	106573119	LOC106573119	caveolin-1-like
gene6003:106598166	289.135	-0.451977	0.170405	0.00799275	0.156981	106598166	gk5	glycerol kinase 5 (putative)
gene52092:106590555	67.0636	0.775545	0.29244	0.00800212	0.156988	106590555	LOC106590555	protein transport protein Sec61 subunit gamma
gene72266:100195535	47.7383	1.00515	0.379036	0.00800471	0.156988	100195535	glo2	Hydroxyacylglutathione hydrolase
gene19076:106612060	32.3757	-1.18279	0.446173	0.00802602	0.157063	106612060	LOC106612060	tyrosine-protein kinase ITK/TSK-like
gene2475:100194632	1207.12	0.420565	0.158616	0.00801452	0.157063	100194632	LOC100194632	endothelial differentiation-related factor 1-1
gene37247:106576153	441.671	0.464339	0.175151	0.00802361	0.157063	106576153	LOC106576153	sorting and assembly machinery component 50 homolog B
gene34929:106573546	46.3608	1.51122	0.570478	0.00807199	0.157541	106573546	LOC106573546	lipoprotein lipase-like
gene42304:100286711	577.177	-0.854749	0.322672	0.00807379	0.157541	100286711	hsp7c	Heat shock cognate 71 kDa protein
gene46343:106585119	186.555	0.612065	0.231045	0.00807014	0.157541	106585119	LOC106585119	condensin complex subunit 2-like
gene51385:106589828	215.438	-0.571388	0.21569	0.00807018	0.157541	106589828	LOC106589828	tetraspanin-15-like
gene28294:106567162	260.231	-0.393101	0.148493	0.0081144	0.158219	106567162	LOC106567162	heme transporter hrg1-B
gene29690:106568615	94.4713	-0.948423	0.358342	0.0081282	0.158362	106568615	epha5	EPH receptor A5
gene52439:106595163	214.634	0.477781	0.180535	0.00813346	0.158362	106595163	LOC106595163	ubiquitin carboxyl-terminal hydrolase 7-like
gene34124:100286631	98.6374	0.912143	0.34473	0.00814584	0.158489	100286631	ube2t	ubiquitin conjugating enzyme E2 T
gene9500:100137020	164.374	0.665188	0.251482	0.0081674	0.158794	100137020	rtn7	reticulon 7
gene41536:106580416	154.08	-0.603053	0.228018	0.00817477	0.158822	106580416	LOC106580416	ras GTPase-activating-like protein IQGAP1
gene26301:106565415	420.506	0.47509	0.179662	0.00818455	0.158898	106565415	LOC106565415	protein canopy homolog 2-like
gene21370:106560561	69.3462	0.914162	0.345852	0.00821222	0.159092	106560561	LOC106560561	hemicentin-1-like
gene44141:106583022	47.3438	-0.812468	0.30736	0.00820833	0.159092	106583022	LOC106583022	uncharacterized LOC106583022
gene9646:106603098	204.647	0.624741	0.236336	0.00820678	0.159092	106603098	LOC106603098	proteasome subunit beta type-6-like
gene313:106569848	816.312	0.366755	0.138816	0.00824134	0.159313	106569848	tfb2m	transcription factor B2, mitochondrial
gene43463:106582299	247.772	-0.410677	0.155432	0.00823798	0.159313	106582299	LOC106582299	unconventional myosin-Ib-like
gene49936:106588322	31.0525	0.91762	0.347308	0.00823946	0.159313	106588322	LOC106588322	atrial natriuretic peptide receptor 1-like
gene22877:106562046	1131.07	-0.488937	0.185104	0.00825609	0.15937	106562046	LOC106562046	adhesion G-protein coupled receptor G5-like
gene3387:106574320	641.552	-0.782224	0.296115	0.00825092	0.15937	106574320	LOC106574320	ephrin-A1-like
gene11750:106605107	55.2369	-1.12356	0.42551	0.00827831	0.159427	106605107	LOC106605107	protein THEMIS2-like
gene45729:106584447	431.611	0.425989	0.16134	0.00828271	0.159427	106584447	LOC106584447	protein QIL1-like
gene48285:106587056	300.129	0.649713	0.246013	0.0082669	0.159427	106587056	LOC106587056	cytoskeleton-associated protein 5-like
gene50868:106589366	71.3457	-0.983846	0.372619	0.00828198	0.159427	106589366	LOC106589366	serine-rich coiled-coil domain-containing protein 2-like
gene4681:106587857	155.583	0.615358	0.23311	0.00829612	0.159572	106587857	LOC106587857	tensin-4-like
gene27509:100136375	394.756	-0.76969	0.291744	0.00833394	0.160185	100136375	hck	hemopoietic cell kinase
gene12029:106605477	592.732	-0.806154	0.305626	0.00834671	0.160316	106605477	LOC106605477	GSK-3-binding protein-like
gene14047:106607353	599.465	-0.76791	0.291378	0.00840262	0.160737	106607353	LOC106607353	3-phosphoinositide-dependent protein kinase 1-like
gene18610:106611623	59.0819	0.660884	0.250733	0.00839365	0.160737	106611623	spata5	spermatogenesis associated 5
gene28515:106567406	535.759	0.550459	0.208799	0.00838135	0.160737	106567406	LOC106567406	complement component 1 Q subcomponent-binding protein, mitochondrial-like
gene4005:106580258	154.972	-0.529527	0.20093	0.00840433	0.160737	106580258	LOC106580258	DENN domain-containing protein 4B-like
gene53862:106590788	613.996	0.501104	0.190099	0.00838847	0.160737	106590788	LOC106590788	dynamin-2-like
gene703:106600595	175.359	0.588433	0.223252	0.00839553	0.160737	106600595	odc1	ornithine decarboxylase 1
gene32768:100194629	1481.65	0.5673	0.215458	0.00846356	0.161755	100194629	LOC100194629	calmodulin 2 (phosphorylase kinase, delta)-3
gene50843:106589347	130.204	-0.958571	0.364175	0.00848419	0.162034	106589347	LOC106589347	FERM and PDZ domain-containing protein 2-like
gene27816:106566721	1473.45	0.576723	0.219181	0.00850672	0.16212	106566721	LOC106566721	prostaglandin E synthase 3-like
gene46634:106585580	64.4823	1.07754	0.409489	0.00850248	0.16212	106585580	LOC106585580	uncharacterized LOC106585580
gene47007:106585781	143.098	-1.00045	0.380203	0.0085042	0.16212	106585781	slc2a6	solute carrier family 2 member 6
gene17076:100194613	3156.36	0.524476	0.199352	0.00851563	0.162176	100194613	hmgb2	high-mobility group box 2
gene11509:106604855	1994	0.675909	0.256954	0.00852685	0.162275	106604855	LOC106604855	fructose-bisphosphate aldolase B-like
gene29330:100380357	309.823	0.496024	0.188636	0.00855043	0.162609	100380357	s26a2	Sulfate transporter
gene35284:106574164	155.034	0.721362	0.274663	0.00863049	0.164016	106574164	LOC106574164	kinesin-like protein KIF14
gene46776:100136483	2259.81	0.559094	0.21291	0.0086403	0.164087	100136483	LOC100136483	tubulin beta-1 chain
gene43032:106581896	93.3649	-0.972637	0.370464	0.00865325	0.164217	106581896	LOC106581896	interferon alpha/beta receptor 1a-like
gene9082:106602658	40.3597	-0.894188	0.340632	0.00866272	0.164281	106602658	LOC106602658	tyrosine-protein phosphatase non-receptor type 9-like
gene52183:106590649	132.922	-0.764113	0.291147	0.00867783	0.164452	106590649	LOC106590649	tissue factor-like
gene58038:106595185	103.164	-0.700987	0.267138	0.00868877	0.164544	106595185	LOC106595185	cingulin-like
gene12306:106605601	215.93	1.0642	0.405743	0.0087201	0.164906	106605601	LOC106605601	chemokine-like receptor 1
gene37975:106576729	62.7973	-0.767506	0.292609	0.00871658	0.164906	106576729	ppp2r5d	protein phosphatase 2 regulatory subunit B'delta
gene9938:100195484	669.11	0.589111	0.224631	0.00872677	0.164916	100195484	rir1	Ribonucleoside-diphosphate reductase large subunit
gene42070:106580923	28.7202	-1.15291	0.439969	0.0087817	0.165838	106580923	LOC106580923	ubiquitin-associated and SH3 domain-containing protein B-like
gene19590:106612675	315.623	-0.525502	0.200629	0.00881182	0.166208	106612675	LOC106612675	kunitz-type protease inhibitor 2-like
gene47470:106586242	51.833	-0.891275	0.340316	0.00881977	0.166208	106586242	LOC106586242	integral membrane protein GPR155-like
gene62243:106599099	117.888	0.651805	0.248862	0.00881507	0.166208	106599099	LOC106599099	glutamate dehydrogenase, mitochondrial-like
gene3243:106573303	267.826	-0.475215	0.181476	0.00882889	0.166258	106573303	LOC106573303	tax1-binding protein 1 homolog B-like
gene912:106603664	91.994	-0.67727	0.258659	0.00883472	0.166258	106603664	LOC106603664	dystrobrevin beta-like
gene26596:106565901	36.3332	1.07063	0.408991	0.00885135	0.166346	106565901	LOC106565901	rho guanine nucleotide exchange factor 10-like protein
gene47432:106586203	64.0312	-0.728393	0.278254	0.00885174	0.166346	106586203	LOC106586203	ceramide synthase 6-like
gene22244:106561383	52.0505	-1.04439	0.399048	0.00886499	0.166363	106561383	LOC106561383	ras and EF-hand domain-containing protein homolog
gene40991:106580178	128.032	0.625432	0.238952	0.00886036	0.166363	106580178	LOC106580178	uncharacterized LOC106580178
gene45441:106584123	93.8461	-0.805188	0.307721	0.00888066	0.166542	106584123	clock	clock circadian regulator
gene39976:106578884	206.882	-0.686743	0.262681	0.00893953	0.167416	106578884	LOC106578884	uncharacterized LOC106578884
gene8826:106602389	3108.48	0.483209	0.184829	0.00893969	0.167416	106602389	LOC106602389	high mobility group protein B2-like
gene18425:106611473	190.178	0.658271	0.251845	0.00895423	0.167482	106611473	LOC106611473	nucleolar and spindle-associated protein 1-like
gene41781:106580625	711.715	-0.471427	0.180365	0.00895561	0.167482	106580625	LOC106580625	ATP-binding cassette sub-family A member 2-like
gene24591:106563730	3842.27	-0.548623	0.209997	0.00898748	0.167961	106563730	LOC106563730	uncharacterized LOC106563730
gene47666:106586437	925.249	0.468301	0.179285	0.00900027	0.168084	106586437	LOC106586437	basic leucine zipper and W2 domain-containing protein 1-A-like
gene14769:100194920	577.736	0.434375	0.166321	0.00900999	0.168149	100194920	acat2	acetyl-CoA acetyltransferase 2
gene13455:100196130	101.299	0.868415	0.33257	0.0090219	0.168255	100196130	leg	Beta-galactoside-binding lectin
gene26932:106566054	339.167	0.5362	0.205384	0.00903517	0.168386	106566054	LOC106566054	leiomodin-1-like
gene50647:106589072	188.623	-0.525861	0.20156	0.00908198	0.169142	106589072	LOC106589072	probable histone deacetylase 1-B
gene49813:106588433	70.9618	0.680682	0.260975	0.00910139	0.169153	106588433	LOC106588433	inhibitor of growth protein 4-like
gene52991:106591425	67.9554	0.943447	0.361717	0.0091007	0.169153	106591425	LOC106591425	serine hydroxymethyltransferase, cytosolic-like
gene8221:100196044	745.456	-0.433052	0.166006	0.00908989	0.169153	100196044	us420	15.5 kDa protein
gene38422:106577323	47.3629	-0.810129	0.310689	0.00911994	0.169265	106577323	LOC106577323	N-acetyllactosaminide beta-1,3-N-acetylglucosaminyltransferase 2-like
gene50294:106588690	71.45	-0.936887	0.359284	0.00911672	0.169265	106588690	LOC106588690	triple functional domain protein-like
gene10711:106604152	146.56	0.738522	0.283373	0.00915581	0.169621	106604152	LOC106604152	annexin A6-like
gene2066:100195612	48.7237	0.935662	0.35906	0.0091643	0.169621	100195612	swi5	SWI5 homologous recombination repair protein
gene24148:106563221	103.66	-1.31183	0.503285	0.00914663	0.169621	106563221	LOC106563221	protein turtle homolog A-like
gene54874:106591166	26.8322	-1.08389	0.41593	0.00916249	0.169621	106591166	LOC106591166	alsin-like
gene39060:106577937	143.414	-0.517281	0.198545	0.00917771	0.169753	106577937	LOC106577937	solute carrier family 12 member 6-like
gene17213:106610305	142.03	-0.664419	0.25515	0.00921337	0.170296	106610305	LOC106610305	calcium uniporter protein, mitochondrial-like
gene10500:106603948	37.9442	1.21102	0.466031	0.00936078	0.170956	106603948	LOC106603948	heat shock protein beta-1-like
gene17084:100196870	126.416	0.707277	0.272142	0.00935152	0.170956	100196870	xtp3a	XTP3-transactivated gene A protein homolog
gene17101:106610194	649.094	0.365386	0.140504	0.00930776	0.170956	106610194	LOC106610194	lipopolysaccharide-responsive and beige-like anchor protein
gene1777:106612394	189.262	0.555127	0.213406	0.00928772	0.170956	106612394	dna2	DNA replication helicase/nuclease 2
gene23433:106562580	16.6559	-1.40216	0.539374	0.00933289	0.170956	106562580	LOC106562580	TNF receptor-associated factor 6-like
gene24185:106563197	257.447	0.600932	0.230951	0.00926852	0.170956	106563197	fam136a	family with sequence similarity 136 member A
gene30574:106569474	534.196	0.685279	0.263667	0.0093486	0.170956	106569474	LOC106569474	zygotic DNA replication licensing factor mcm6-B-like
gene31440:106570310	113.808	0.769553	0.29612	0.0093554	0.170956	106570310	LOC106570310	replication protein A 14 kDa subunit-like
gene32398:100194994	1054.53	0.606627	0.233186	0.00928243	0.170956	100194994	rir2	Ribonucleoside-diphosphate reductase subunit M2
gene32769:106571671	129.412	-0.511106	0.196693	0.00936309	0.170956	106571671	LOC106571671	breast cancer metastasis-suppressor 1-like protein-A
gene36043:106574967	1143.15	0.493575	0.189693	0.00926901	0.170956	106574967	LOC106574967	regucalcin-like
gene38858:106577760	278.411	-0.594136	0.228644	0.00936276	0.170956	106577760	LOC106577760	PERQ amino acid-rich with GYF domain-containing protein 1-like
gene42677:106581529	119.173	0.631784	0.243067	0.00934382	0.170956	106581529	tmem97	transmembrane protein 97
gene45316:106584069	286.93	0.489046	0.188112	0.00932901	0.170956	106584069	sirt5	sirtuin 5
gene5693:106596347	131.589	-0.65899	0.253545	0.00934687	0.170956	106596347	LOC106596347	ubiquitin carboxyl-terminal hydrolase 33-like
gene67430:106591049	326.847	0.583121	0.224319	0.00933566	0.170956	106591049	LOC106591049	phosphatidylinositol 3,4,5-trisphosphate 5-phosphatase 2A-like
gene74293:106590999	104.452	-0.834964	0.321124	0.0093188	0.170956	106590999	LOC106590999	oxysterol-binding protein-related protein 10-like
gene79897:106593586	51.1349	-0.874629	0.336582	0.0093616	0.170956	106593586	LOC106593586	uncharacterized LOC106593586
gene30582:106569490	83.0648	-0.698557	0.268903	0.00938211	0.171187	106569490	LOC106569490	SH2 domain-containing protein 1A-like
gene15921:106609012	26.1014	-1.3816	0.531947	0.00939752	0.171237	106609012	LOC106609012	SLAM family member 8-like
gene26008:106565226	23009.3	0.40921	0.157543	0.00939189	0.171237	106565226	LOC106565226	keratin, type II cytoskeletal 8-like
gene19307:100195362	972.817	0.577156	0.222263	0.00941173	0.17138	100195362	tgfbi	transforming growth factor beta induced
gene37118:106576025	374.097	0.518587	0.199757	0.00942906	0.17158	106576025	calu	calumenin
gene28274:106567146	40.0902	-0.837039	0.322794	0.0095114	0.172961	106567146	LOC106567146	dnaJ homolog subfamily C member 16-like
gene36800:106575698	223.428	0.501952	0.193607	0.00952436	0.17308	106575698	LOC106575698	importin-5-like
gene47574:106586300	199.067	0.571801	0.220611	0.00954472	0.173334	106586300	LOC106586300	putative methyltransferase DDB_G0268948
gene32281:106571136	73.7165	-1.29857	0.501493	0.00961403	0.174469	106571136	LOC106571136	cerebellin-2-like
gene8162:106601794	133.504	-1.10191	0.425583	0.00962019	0.174469	106601794	LOC106601794	sterile alpha motif domain-containing protein 9-like
gene44057:106582888	129.262	0.806964	0.311712	0.00963079	0.174544	106582888	LOC106582888	protein FAM83D-like
gene2266:106563559	408.441	-0.503116	0.194393	0.0096497	0.17462	106563559	LOC106563559	FYN-binding protein-like
gene44462:100196712	162.42	0.645696	0.249499	0.0096544	0.17462	100196712	cdk2	cyclin dependent kinase 2
gene70614:106595639	122.274	-1.20068	0.463913	0.00964891	0.17462	106595639	LOC106595639	E3 ubiquitin-protein ligase TRIM39-like
gene13797:106607055	83.4179	0.760467	0.293919	0.00967217	0.17478	106607055	LOC106607055	DNA replication licensing factor mcm5-like
gene51959:106590401	144.879	-0.592559	0.229036	0.0096762	0.17478	106590401	LOC106590401	brefeldin A-inhibited guanine nucleotide-exchange protein 1-like
gene7751:106601378	22.3832	-1.61023	0.622661	0.00970823	0.175242	106601378	LOC106601378	phosphoinositide 3-kinase regulatory subunit 6-like
gene3717:106577478	420.916	0.552591	0.213747	0.00973056	0.175527	106577478	LOC106577478	mitochondrial import receptor subunit TOM40 homolog
gene10712:106604149	1041.01	-0.454067	0.175719	0.00976494	0.175803	106604149	LOC106604149	TNFAIP3-interacting protein 1-like
gene13863:106607104	375.187	-0.447526	0.173234	0.00978413	0.175803	106607104	LOC106607104	CD9 antigen-like
gene14498:106607718	34.7309	-0.973315	0.376762	0.00978405	0.175803	106607718	bach2	BTB domain and CNC homolog 2
gene42466:106581335	287.407	0.496526	0.192237	0.00979797	0.175803	106581335	LOC106581335	integrin-linked protein kinase
gene44738:106583421	136.565	0.58033	0.224602	0.0097714	0.175803	106583421	nudt2	nudix hydrolase 2
gene46150:106584876	77.0172	-0.741603	0.287078	0.00978667	0.175803	106584876	LOC106584876	uncharacterized LOC106584876
gene46450:106585031	238.305	0.500148	0.193637	0.00979699	0.175803	106585031	LOC106585031	28S ribosomal protein S36, mitochondrial-like
gene9259:106602836	29.2469	-0.921111	0.356474	0.00976764	0.175803	106602836	LOC106602836	max-binding protein MNT-like
gene1682:106613146	65.2325	-0.973125	0.376824	0.00981058	0.175913	106613146	LOC106613146	transmembrane protein 150A-like
gene12219:106605563	51.9605	-1.01998	0.395055	0.00982692	0.175972	106605563	LOC106605563	hemicentin-2-like
gene45633:106584371	27.926	-0.921001	0.356692	0.0098211	0.175972	106584371	LOC106584371	A disintegrin and metalloproteinase with thrombospondin motifs 10-like
gene10388:100195364	101.318	0.872079	0.337815	0.00983627	0.176022	100195364	dpyl3	Dihydropyrimidinase-related protein 3
gene15747:106608866	45.4884	-0.948035	0.367356	0.00986009	0.176215	106608866	LOC106608866	uncharacterized LOC106608866
gene68013:106593720	58.2921	-0.923775	0.357942	0.00985722	0.176215	106593720	LOC106593720	thyroid receptor-interacting protein 11-like
gene38956:106577828	357.493	-0.538174	0.20857	0.00987126	0.176298	106577828	LOC106577828	poly [ADP-ribose] polymerase 14-like
gene11086:100380635	636.563	0.674798	0.261618	0.00989934	0.176449	100380635	mcm7	minichromosome maintenance complex component 7
gene22005:106561173	36910.9	-0.67229	0.260607	0.00988837	0.176449	106561173	LOC106561173	pro-cathepsin H-like
gene43820:106582598	45.8315	-0.756054	0.2931	0.00989417	0.176449	106582598	LOC106582598	methionine--tRNA ligase, cytoplasmic-like
gene28089:106566984	284.151	-0.554552	0.215019	0.00990636	0.176458	106566984	kiaa1324	KIAA1324 ortholog
gene20069:106613101	16.8327	-1.49185	0.579141	0.00999602	0.177937	106613101	LOC106613101	dehydrogenase/reductase SDR family member 13-like
gene21826:106560919	376.394	0.739303	0.287114	0.0100256	0.178158	106560919	LOC106560919	protein NDRG4-like
gene26488:100195781	459.43	0.595763	0.231377	0.0100282	0.178158	100195781	pfdn5	prefoldin subunit 5
gene51912:106590366	203.7	-0.516223	0.200473	0.0100232	0.178158	106590366	LOC106590366	aspartyl/asparaginyl beta-hydroxylase-like
gene27169:100196609	133.679	0.881549	0.342427	0.0100409	0.178266	100196609	stk6	Serine/threonine-protein kinase 6
gene12406:106605758	91.5447	-0.626068	0.243277	0.0100682	0.178399	106605758	LOC106605758	leukocyte receptor cluster member 1 homolog
gene13906:106607206	93.6002	-0.739239	0.287205	0.0100559	0.178399	106607206	LOC106607206	intercellular adhesion molecule 1-like
gene25961:106565270	19.6618	1.21635	0.472649	0.010068	0.178399	106565270	LOC106565270	stathmin-3-like
gene28034:106566937	379.553	-0.57716	0.224388	0.0101069	0.178966	106566937	LOC106566937	DENN domain-containing protein 2D-like
gene39051:106577987	29.3576	-1.15886	0.450604	0.0101174	0.179034	106577987	LOC106577987	C-type mannose receptor 2-like
gene10970:106604332	56.6422	-0.796568	0.309818	0.0101381	0.179284	106604332	LOC106604332	beta-2 adrenergic receptor-like
gene18148:106611201	92.8396	0.664482	0.258595	0.0101821	0.179826	106611201	LOC106611201	G2/M phase-specific E3 ubiquitin-protein ligase-like
gene2929:106570436	126.736	-0.532058	0.207042	0.0101755	0.179826	106570436	LOC106570436	ral guanine nucleotide dissociation stimulator-like
gene16253:106609359	26.029	-1.42931	0.556441	0.0102093	0.179836	106609359	LOC106609359	gelsolin-like
gene49286:106588063	1269.57	-0.6607	0.257197	0.0102038	0.179836	106588063	LOC106588063	aminopeptidase N-like
gene49583:106588126	21.188	-1.32227	0.514701	0.0101991	0.179836	106588126	LOC106588126	palmitoyltransferase ZDHHC7-like
gene79898:106593585	62.3166	-0.869665	0.33853	0.0102008	0.179836	106593585	LOC106593585	hypoxia-inducible factor 1-alpha-like
gene250:100195585	383.681	0.481829	0.187618	0.0102247	0.179872	100195585	znf593	zinc finger protein 593
gene31393:106570260	840.816	0.543241	0.211513	0.0102181	0.179872	106570260	LOC106570260	stathmin-like
gene26376:106565475	123.127	1.34059	0.522074	0.0102342	0.179921	106565475	LOC106565475	uncharacterized LOC106565475
gene29562:100136497	121.657	-0.62519	0.243593	0.0102719	0.180341	100136497	prlr	prolactin receptor
gene36608:106575523	32.658	1.22057	0.475568	0.0102716	0.180341	106575523	LOC106575523	rho GTPase-activating protein 20-like
gene38754:106577632	18.6596	-1.39716	0.544468	0.0102848	0.180341	106577632	LOC106577632	arf-GAP domain and FG repeat-containing protein 2-like
gene40868:106579756	277.57	-0.570217	0.222192	0.0102783	0.180341	106579756	LOC106579756	3-ketoacyl-CoA thiolase B, peroxisomal-like
gene51670:106590127	259.177	0.557962	0.217469	0.0102966	0.180431	106590127	chmp4c	charged multivesicular body protein 4C
gene8125:106601757	158.351	-0.58405	0.227705	0.0103195	0.180715	106601757	LOC106601757	sterile alpha motif domain-containing protein 9-like
gene22852:106562005	139.86	0.831751	0.324346	0.0103358	0.180765	106562005	shcbp1	SHC binding and spindle associated 1
gene33238:106572208	8946.8	0.478062	0.18642	0.0103343	0.180765	106572208	LOC106572208	nuclease-sensitive element-binding protein 1-like
gene32694:106571490	607.113	0.921213	0.359268	0.0103432	0.180778	106571490	LOC106571490	serine protease 23-like
gene4654:106588090	2376.28	0.279641	0.109082	0.0103597	0.180949	106588090	LOC106588090	rho GDP-dissociation inhibitor 1-like
gene54136:106598957	197.656	0.487055	0.190061	0.0103886	0.181336	106598957	LOC106598957	uncharacterized LOC106598957
gene11112:106604467	61.8694	-0.812941	0.317285	0.0104018	0.181386	106604467	LOC106604467	sodium bicarbonate transporter-like protein 11
gene51580:106590025	264.783	-0.488798	0.190782	0.0104049	0.181386	106590025	LOC106590025	integrin beta-1-like
gene7983:106601612	72.8963	-0.732374	0.285925	0.0104244	0.18161	106601612	LOC106601612	uncharacterized LOC106601612
gene7764:100306767	154.073	-0.776324	0.303111	0.0104316	0.181617	100306767	grb2	growth factor receptor-bound protein 2
gene7262:106600853	169.23	-0.642297	0.2509	0.0104681	0.182135	106600853	LOC106600853	neurabin-2-like
gene1198:106606339	268.422	0.922625	0.360566	0.0105026	0.182476	106606339	LOC106606339	lymphocyte-specific helicase-like
gene38155:106577031	21.2565	-1.3774	0.538317	0.010506	0.182476	106577031	LOC106577031	indoleamine 2,3-dioxygenase 2-like
gene49616:100196409	106.006	0.829214	0.324083	0.010508	0.182476	100196409	cks1	Cyclin-dependent kinases regulatory subunit 1
gene30214:106569068	251.59	-0.627109	0.245131	0.0105197	0.182562	106569068	LOC106569068	ras GTPase-activating protein nGAP-like
gene43493:106582342	232.19	0.467511	0.182773	0.0105312	0.182645	106582342	LOC106582342	telomere-associated protein RIF1-like
gene24250:106563533	927.647	0.548926	0.214686	0.0105615	0.183053	106563533	LOC106563533	CD81 antigen-like
gene47871:106586634	61.5136	0.886703	0.346983	0.0106046	0.183682	106586634	LOC106586634	chromatin assembly factor 1 subunit B-like
gene25511:100195896	3091.93	0.580029	0.227016	0.0106183	0.183801	100195896	rssa	40S ribosomal protein SA
gene29599:106568522	133.797	-0.547669	0.214429	0.0106469	0.183837	106568522	LOC106568522	protein Shroom3-like
gene33956:106572808	132.512	-0.49079	0.192178	0.0106545	0.183837	106572808	LOC106572808	tumor necrosis factor receptor superfamily member 14-like
gene46792:106585427	122.244	-0.700903	0.274423	0.0106462	0.183837	106585427	LOC106585427	endoplasmic reticulum mannosyl-oligosaccharide 1,2-alpha-mannosidase-like
gene51502:106589948	176.361	-1.05675	0.413756	0.0106483	0.183837	106589948	LOC106589948	fibrous sheath CABYR-binding protein-like
gene75544:106592749	131.434	-0.510718	0.199954	0.0106437	0.183837	106592749	LOC106592749	ensconsin-like
gene25460:100380663	3437.08	0.63896	0.250288	0.0106829	0.183975	100380663	LOC100380663	myosin-11
gene7187:106600907	68.8401	-0.616356	0.241427	0.0106809	0.183975	106600907	LOC106600907	uncharacterized LOC106600907
gene7620:106601250	156.493	-0.520888	0.204017	0.0106752	0.183975	106601250	LOC106601250	MKL/myocardin-like protein 1
gene10177:100196285	195.588	0.562185	0.220234	0.0106902	0.183983	100196285	rfc2	replication factor C (activator 1) 2
gene45749:106584470	223.106	-0.44447	0.174143	0.0107006	0.184044	106584470	LOC106584470	SRSF protein kinase 2-like
gene26132:100136526	85.9478	-0.807683	0.316548	0.0107251	0.184349	100136526	LOC100136526	peroxisome proliferator-activated receptor delta
gene4305:106583301	112.974	-1.00593	0.394502	0.0107759	0.185104	106583301	LOC106583301	forkhead box protein O3-like
gene41506:106580282	826.105	-0.436727	0.171314	0.0107947	0.185309	106580282	lnpep	leucyl and cystinyl aminopeptidase
gene70809:100195259	1507.56	0.443404	0.173955	0.0108046	0.185361	100195259	ptbp1	Polypyrimidine tract-binding protein 1
gene34738:106573726	239.245	-0.661753	0.259716	0.0108347	0.185759	106573726	LOC106573726	core-binding factor subunit beta
gene41486:106580299	79.2316	1.42646	0.559911	0.0108452	0.185821	106580299	LOC106580299	polyubiquitin-like
gene37283:106576207	434.471	-0.668446	0.262459	0.0108698	0.186125	106576207	LOC106576207	protein MCM10 homolog
gene13133:106606482	16.3933	-1.37293	0.539153	0.0108824	0.1862	106606482	LOC106606482	cAMP-dependent protein kinase type I-beta regulatory subunit-like
gene49558:106588098	20.9416	-1.17634	0.461984	0.010888	0.1862	106588098	LOC106588098	multiple C2 and transmembrane domain-containing protein 2-like
gene11397:100306772	651.286	0.449443	0.176686	0.0109671	0.186511	100306772	hnrpg	Heterogeneous nuclear ribonucleoprotein G
gene19528:106612729	20.7051	1.21396	0.477242	0.0109684	0.186511	106612729	LOC106612729	FXYD domain-containing ion transport regulator 6-like
gene20935:106613883	88.072	0.734367	0.288618	0.0109457	0.186511	106613883	LOC106613883	DEP domain-containing protein 1A-like
gene35572:106574550	8240.87	0.279734	0.109951	0.0109536	0.186511	106574550	LOC106574550	ATP synthase subunit beta, mitochondrial
gene3690:106577194	2049.8	0.592285	0.232801	0.0109536	0.186511	106577194	LOC106577194	40S ribosomal protein S9
gene3746:106578085	1193.86	-0.615848	0.242005	0.010935	0.186511	106578085	LOC106578085	chemokine-like receptor 1
gene39881:106578788	450.191	0.397839	0.156346	0.0109402	0.186511	106578788	mrpl14	mitochondrial ribosomal protein L14
gene41923:100195034	2876.72	-0.423872	0.166599	0.010951	0.186511	100195034	spit2	Kunitz-type protease inhibitor 2
gene419:106580335	389.921	0.493389	0.193942	0.0109591	0.186511	106580335	LOC106580335	MARCKS-related protein-like
gene50643:106589075	102.055	-0.812107	0.319291	0.0109758	0.18652	106589075	LOC106589075	importin subunit alpha-7-like
gene11410:106604754	181.191	0.682052	0.268201	0.0109884	0.186616	106604754	LOC106604754	centromere protein I-like
gene22036:106561208	74.3026	0.829896	0.326535	0.011037	0.187184	106561208	LOC106561208	voltage-dependent calcium channel subunit alpha-2/delta-1-like
gene29025:106568042	150.554	-0.960374	0.377851	0.0110323	0.187184	106568042	LOC106568042	olfactory receptor 52D1-like
gene37880:100194723	675.391	0.356152	0.140143	0.0110426	0.187184	100194723	LOC100194723	thioredoxin-dependent peroxide reductase, mitochondrial
gene47678:106586447	127.041	0.690959	0.271978	0.0110696	0.187523	106586447	cps1	carbamoyl-phosphate synthase 1
gene42182:106581036	423.19	-0.449278	0.176943	0.0111136	0.188051	106581036	LOC106581036	carboxypeptidase D-like
gene50646:100194772	2274.05	0.451269	0.177732	0.0111155	0.188051	100194772	eif3i	eukaryotic translation initiation factor 3 subunit I
gene71272:106594162	60.8217	0.89978	0.354404	0.0111217	0.188051	106594162	LOC106594162	structural maintenance of chromosomes protein 2-like
gene4599:106585470	123.296	-0.572318	0.225495	0.0111472	0.188365	106585470	LOC106585470	phosphoinositide 3-kinase regulatory subunit 4-like
gene20177:106613167	456.84	-0.414266	0.163283	0.0111775	0.188678	106613167	LOC106613167	integral membrane protein 2C-like
gene47293:106586050	83.4331	-0.606122	0.238931	0.0111867	0.188678	106586050	LOC106586050	G-protein coupled receptor 183-like
gene48378:106587142	119.958	-0.771817	0.304247	0.0111867	0.188678	106587142	LOC106587142	G-protein coupled receptor 64-like
gene10553:106603993	164.051	-0.614982	0.242516	0.0112177	0.188699	106603993	LOC106603993	globoside alpha-1,3-N-acetylgalactosaminyltransferase 1-like
gene13295:100196528	316.669	0.54049	0.213154	0.011223	0.188699	100196528	nduba	NADH dehydrogenase 1 beta subcomplex subunit 10
gene25931:106565292	82.173	0.580747	0.229004	0.0112135	0.188699	106565292	LOC106565292	uncharacterized LOC106565292
gene34:106565696	43.4179	-0.823111	0.32453	0.0112026	0.188699	106565696	LOC106565696	rab11 family-interacting protein 5-like
gene8234:106601868	79.2224	0.847752	0.334323	0.0112214	0.188699	106601868	LOC106601868	cyclin-F-like
gene38724:106577605	220.621	0.54696	0.215851	0.0112778	0.189503	106577605	LOC106577605	zinc finger MYM-type protein 1-like
gene14112:106607299	224.948	0.955509	0.377301	0.0113257	0.18984	106607299	LOC106607299	polymerase I and transcript release factor-like
gene14447:106607674	120.214	-0.543958	0.214799	0.0113284	0.18984	106607674	LOC106607674	serine/threonine-protein kinase D3-like
gene27583:100194767	223.577	-0.7135	0.281705	0.011316	0.18984	100194767	pim1	pim-1 oncogene
gene45056:106583814	248.232	0.472212	0.186465	0.011327	0.18984	106583814	pdhb	pyruvate dehydrogenase E1 beta subunit
gene7207:106600884	699.054	0.508463	0.200794	0.011333	0.18984	106600884	LOC106600884	3-mercaptopyruvate sulfurtransferase-like
gene21876:106560874	107.344	-0.661513	0.261423	0.0113922	0.190303	106560874	LOC106560874	malonyl-CoA decarboxylase, mitochondrial-like
gene22510:106561663	832.329	-0.412861	0.163156	0.011391	0.190303	106561663	LOC106561663	uncharacterized LOC106561663
gene30466:106569305	57.039	0.857063	0.338649	0.0113793	0.190303	106569305	LOC106569305	outer dense fiber protein 2-like
gene33574:106572382	66.4879	-0.768197	0.303564	0.0113869	0.190303	106572382	LOC106572382	semaphorin-3F-like
gene50838:106589223	60.7648	-0.739773	0.292363	0.0113959	0.190303	106589223	LOC106589223	uncharacterized LOC106589223
gene26474:106565518	2405.13	0.49093	0.194186	0.0114669	0.191197	106565518	LOC106565518	myosin light polypeptide 6
gene2923:106570496	1824.98	0.417504	0.165136	0.0114635	0.191197	106570496	LOC106570496	D-dopachrome decarboxylase-A-like
gene63841:106594961	42.2127	-1.5452	0.611228	0.0114707	0.191197	106594961	LOC106594961	uncharacterized LOC106594961
gene24471:106563618	57.1401	0.825092	0.326567	0.0115184	0.191874	106563618	LOC106563618	M-phase inducer phosphatase 1-B-like
gene36820:106575720	1354.53	0.502682	0.199026	0.0115464	0.192222	106575720	LOC106575720	elongation factor 1-beta-like
gene14433:100194853	557.205	0.468092	0.185384	0.0115703	0.192382	100194853	cpsf3	cleavage and polyadenylation specific factor 3
gene24760:100195478	1479.13	0.530995	0.21028	0.0115637	0.192382	100195478	cct8	chaperonin containing TCP1 subunit 8
gene56700:106593651	23.2502	-1.54645	0.612536	0.0115808	0.192438	106593651	LOC106593651	uncharacterized LOC106593651
gene12885:106606230	18.4156	-1.17485	0.465417	0.0115932	0.192467	106606230	LOC106606230	rho GDP-dissociation inhibitor 2-like
gene13162:106606510	201.793	0.496837	0.196879	0.0116174	0.192467	106606510	LOC106606510	heat shock protein 75 kDa, mitochondrial-like
gene27681:106566597	107.158	0.530163	0.210105	0.0116253	0.192467	106566597	LOC106566597	glucose-induced degradation protein 8 homolog
gene51222:100195417	2250	-0.741689	0.29393	0.0116243	0.192467	100195417	agt	angiotensinogen
gene51722:106590174	777.484	0.476037	0.188623	0.0116112	0.192467	106590174	LOC106590174	anion exchange protein 2-like
gene8315:106601949	76.9477	0.778883	0.308599	0.0116051	0.192467	106601949	LOC106601949	glycogen [starch] synthase, muscle-like
gene34359:106573220	101.806	0.526604	0.208825	0.0116773	0.193209	106573220	LOC106573220	phosphatidylinositol N-acetylglucosaminyltransferase subunit Y-like
gene33728:106572638	51.0019	-0.883397	0.350348	0.011686	0.193234	106572638	LOC106572638	protein diaphanous homolog 3-like
gene30367:106569154	19.0155	-1.37131	0.543964	0.0117035	0.193367	106569154	LOC106569154	interferon regulatory factor 4-like
gene3706:101448048	96.7942	0.689074	0.273377	0.0117155	0.193367	101448048	mrpl17	ribosomal protein L17 mitochondrial-like protein
gene37809:100194570	1273.72	0.357579	0.141857	0.0117125	0.193367	100194570	echs1	enoyl-CoA hydratase, short chain 1
gene19068:106612055	86.03	-0.564958	0.224235	0.0117525	0.193671	106612055	LOC106612055	tyrosine-protein kinase ITK/TSK-like
gene31977:106570884	70.7311	-2.69346	1.06899	0.011748	0.193671	106570884	LOC106570884	perforin-1-like
gene33235:106572212	328.174	0.53227	0.211268	0.0117555	0.193671	106572212	LOC106572212	transcription initiation factor TFIID subunit 10-like
gene18191:106611251	169.889	-0.698343	0.277402	0.0118211	0.193939	106611251	LOC106611251	HHIP-like protein 1
gene24429:100380485	40.3802	-0.89242	0.354471	0.0118154	0.193939	100380485	liph	Lipase member H
gene26033:106565201	141.23	0.859825	0.341467	0.0118014	0.193939	106565201	lyar	Ly1 antibody reactive
gene2848:100196660	8498.9	0.519485	0.206351	0.0118199	0.193939	100196660	ppia1	2-peptidylprolyl isomerase A
gene41967:106580809	32.5043	0.921954	0.366184	0.0118113	0.193939	106580809	LOC106580809	neuromodulin-like
gene43232:106582052	73.1358	-0.728187	0.28926	0.011822	0.193939	106582052	LOC106582052	uncharacterized LOC106582052
gene831:106602210	345.454	0.553731	0.219944	0.0118158	0.193939	106602210	timm9	translocase of inner mitochondrial membrane 9
gene13948:106607164	327.86	0.534974	0.212565	0.0118441	0.193947	106607164	LOC106607164	ran GTPase-activating protein 1-like
gene17177:106610270	97.8802	0.656569	0.260877	0.0118434	0.193947	106610270	LOC106610270	sperm-associated antigen 5-like
gene47190:106585942	178.113	-0.944049	0.375073	0.0118367	0.193947	106585942	LOC106585942	uncharacterized LOC106585942
gene21435:106560627	3187.71	-0.604694	0.24029	0.0118521	0.193961	106560627	LOC106560627	unconventional myosin-VIIa-like
gene6370:106599438	70.4448	-1.16967	0.464904	0.0118718	0.194047	106599438	LOC106599438	25-hydroxycholesterol 7-alpha-hydroxylase-like
gene68625:106600072	20.9954	-1.17503	0.467004	0.0118658	0.194047	106600072	LOC106600072	uncharacterized LOC106600072
gene19739:106612560	23.8593	1.1512	0.457819	0.0119188	0.19458	106612560	LOC106612560	uncharacterized LOC106612560
gene4031:101448021	371.363	-0.836114	0.33251	0.0119185	0.19458	101448021	gbp	GSK-3-binding protein
gene23067:106562237	341.704	0.674961	0.268729	0.0120159	0.196047	106562237	LOC106562237	nestin-like
gene16290:106609391	24.3342	-1.65214	0.657982	0.0120419	0.196297	106609391	LOC106609391	probable polypeptide N-acetylgalactosaminyltransferase 8
gene16320:106609479	164.115	0.681851	0.271567	0.0120458	0.196297	106609479	LOC106609479	small nuclear ribonucleoprotein F
gene64266:106591903	364.946	0.862028	0.343376	0.0120579	0.196375	106591903	LOC106591903	polyadenylate-binding protein 1-like
gene44858:106583655	71.3447	1.06046	0.42256	0.0120865	0.196723	106583655	LOC106583655	uncharacterized LOC106583655
gene26719:106565783	71.1361	-0.652963	0.260353	0.0121421	0.197436	106565783	LOC106565783	short transient receptor potential channel 4-associated protein-like
gene29053:106567844	259.303	0.386521	0.154121	0.0121449	0.197436	106567844	LOC106567844	myotubularin-related protein 2-like
gene36144:100196362	640.182	0.337695	0.134676	0.0121599	0.19756	100196362	mtx2	metaxin 2
gene14476:106607702	136.95	0.771781	0.307882	0.012185	0.197848	106607702	LOC106607702	mitotic checkpoint serine/threonine-protein kinase BUB1-like
gene47264:106586018	67.9464	-0.837998	0.334388	0.0122084	0.198109	106586018	LOC106586018	P2Y purinoceptor 8-like
gene1983:100195221	758.362	0.334249	0.13341	0.0122305	0.19823	100195221	nup54	nucleoporin 54
gene350:106572928	143.481	0.742272	0.296264	0.0122299	0.19823	106572928	LOC106572928	peroxidasin-like
gene6934:106600540	33.047	-1.09927	0.438828	0.0122444	0.198336	106600540	LOC106600540	uncharacterized LOC106600540
gene19416:106612393	143.293	-0.511227	0.204114	0.0122584	0.198443	106612393	slc1a5	solute carrier family 1 member 5
gene4300:106583294	245.865	0.611514	0.244221	0.0122818	0.198703	106583294	rpa2	replication protein A2
gene31955:106570812	161.938	-1.72647	0.689634	0.0122987	0.198857	106570812	LOC106570812	up-regulator of cell proliferation-like
gene5744:106596853	146.137	-0.49394	0.197328	0.0123094	0.198886	106596853	LOC106596853	rho GTPase-activating protein 29-like
gene6729:106600129	28.9564	-1.13971	0.455343	0.0123152	0.198886	106600129	LOC106600129	calcium-binding protein J-like
gene27765:106566610	210.452	-0.465898	0.18617	0.0123303	0.198919	106566610	LOC106566610	FYVE, RhoGEF and PH domain-containing protein 3-like
gene41992:106580830	67.462	0.680276	0.271839	0.012332	0.198919	106580830	LOC106580830	numb-like protein
gene48071:100302030	33.1258	-1.02547	0.409971	0.0123727	0.199456	100302030	LOC100302030	TLR8-like
gene44342:106583219	400.749	0.417453	0.166907	0.0123803	0.199459	106583219	LOC106583219	proliferation-associated protein 2G4-like
gene11369:106604720	59.8039	0.820104	0.32804	0.0124188	0.199618	106604720	LOC106604720	uncharacterized LOC106604720
gene34494:106573354	502.571	-0.409995	0.163962	0.0124	0.199618	106573354	LOC106573354	tripartite motif-containing protein 44-like
gene39554:100194885	79.0783	-0.895034	0.357991	0.0124137	0.199618	100194885	cd226	CD226 molecule
gene42817:106581656	831.085	-0.514993	0.205998	0.0124197	0.199618	106581656	LOC106581656	leucine-rich repeat flightless-interacting protein 2-like
gene39250:106578147	42.9608	-0.941899	0.376878	0.0124468	0.199934	106578147	LOC106578147	dysferlin-like
gene41337:106579878	344.656	0.402227	0.160957	0.0124556	0.199957	106579878	LOC106579878	serine/threonine-protein phosphatase 2A 55 kDa regulatory subunit B alpha isoform-like
gene20123:106613113	258.775	0.414339	0.165915	0.0125142	0.200778	106613113	LOC106613113	28S ribosomal protein S22, mitochondrial-like
gene976:100196073	140.518	-0.543361	0.217642	0.0125398	0.201069	100196073	sptlc2	serine palmitoyltransferase long chain base subunit 2
gene710:106600691	158.642	0.523152	0.20957	0.0125493	0.201101	106600691	pdss2	decaprenyl diphosphate synthase subunit 2
gene15107:100380449	56.688	0.871662	0.349248	0.0125664	0.201137	100380449	stk35	serine/threonine kinase 35
gene2557:100286733	1515.1	0.503024	0.201534	0.0125612	0.201137	100286733	habp4	Intracellular hyaluronan-binding protein 4
gene10577:106604011	180.296	-0.430385	0.172464	0.0125779	0.201202	106604011	LOC106604011	SUMO-specific isopeptidase USPL1-like
gene22861:106562015	44.9812	-0.792242	0.317523	0.0125934	0.20121	106562015	LOC106562015	zinc finger protein 536-like
gene24751:100136454	2198.69	0.374958	0.150273	0.0125892	0.20121	100136454	sod1	superoxide dismutase 1, soluble
gene25484:106564707	22.079	-1.03774	0.416017	0.0126146	0.201431	106564707	LOC106564707	potassium voltage-gated channel subfamily KQT member 5-like
gene16191:106609299	178.653	0.645884	0.259041	0.0126539	0.201667	106609299	LOC106609299	filamin-C-like
gene21284:106560465	39.0936	0.931392	0.373602	0.0126668	0.201667	106560465	ak4	adenylate kinase 4
gene22614:106561778	66.1467	-0.749512	0.300555	0.0126399	0.201667	106561778	LOC106561778	unconventional myosin-Vc-like
gene27662:106566553	155.9	0.565553	0.226844	0.0126621	0.201667	106566553	dhx35	DEAH-box helicase 35
gene72344:100380377	182.669	0.471131	0.188951	0.0126525	0.201667	100380377	acot8	acyl-CoA thioesterase 8
gene31053:106570059	58.3325	-0.708723	0.284367	0.0126925	0.201958	106570059	LOC106570059	transmembrane protein C9orf91 homolog
gene39936:106578831	69.42	0.786298	0.315535	0.0127044	0.202028	106578831	LOC106578831	kinesin-like protein KIF20B
gene42880:106581856	171.432	0.441013	0.176996	0.0127147	0.202072	106581856	LOC106581856	mitochondrial chaperone BCS1
gene23949:106563151	25.5242	-1.16831	0.46899	0.012734	0.202202	106563151	LOC106563151	interleukin-6 receptor subunit beta-like
gene43832:100195963	18.4673	-1.12053	0.449829	0.0127378	0.202202	100195963	ppp1r16b	protein phosphatase 1 regulatory subunit 16B
gene45911:106584639	372.304	-0.538388	0.216153	0.0127466	0.202222	106584639	LOC106584639	tripartite motif-containing protein 47-like
gene40872:106579759	25.2754	1.27005	0.510116	0.0127838	0.202693	106579759	LOC106579759	glycogenin-1-like
gene42138:106581014	140.053	-0.899975	0.361544	0.0128012	0.202849	106581014	LOC106581014	calpain-5-like
gene14217:106607492	2152.81	0.440791	0.177117	0.012821	0.203026	106607492	LOC106607492	ATP synthase F(0) complex subunit C3, mitochondrial-like
gene34957:106573835	209.703	-0.504738	0.202837	0.0128321	0.203026	106573835	LOC106573835	cytoplasmic FMR1-interacting protein 1 homolog
gene43663:106582480	21.0872	1.92472	0.773502	0.0128349	0.203026	106582480	LOC106582480	uncharacterized LOC106582480
gene23121:106562286	459.145	0.555149	0.223162	0.0128591	0.203171	106562286	LOC106562286	cytochrome c oxidase subunit 4 isoform 1, mitochondrial-like
gene47810:100195251	28.4343	-1.09756	0.44117	0.0128525	0.203171	100195251	cxb6	Gap junction beta-6 protein
gene14591:106607782	118.1	0.849202	0.341439	0.0128781	0.203351	106607782	LOC106607782	cardiac phospholamban-like
gene21533:106560699	69.875	-0.765201	0.307919	0.0129524	0.204406	106560699	ptdss2	phosphatidylserine synthase 2
gene50385:106588811	166.205	-0.567503	0.228408	0.0129694	0.204555	106588811	LOC106588811	ataxin-1-like
gene15410:106608516	203.43	-0.516445	0.207915	0.0129945	0.204637	106608516	lrch4	leucine rich repeats and calponin homology domain containing 4
gene25051:106564191	64.3393	-1.193	0.480303	0.0129974	0.204637	106564191	LOC106564191	eggshell protein 1-like
gene75754:106594007	246.405	0.698035	0.281018	0.0129933	0.204637	106594007	LOC106594007	ictacalcin-like
gene22413:106561557	40.7428	0.822611	0.331237	0.0130115	0.204739	106561557	poc1b	POC1 centriolar protein B
gene28302:106567172	3375.04	0.339015	0.136586	0.0130623	0.2053	106567172	LOC106567172	bridging integrator 2-like
gene29954:106568976	1311.16	-0.562966	0.226804	0.0130585	0.2053	106568976	LOC106568976	gelsolin-like
gene6001:106598580	21.3099	-1.04292	0.420304	0.013089	0.205599	106598580	LOC106598580	patched domain-containing protein 3-like
gene23679:106562833	62.6471	0.732546	0.295283	0.0131078	0.205775	106562833	LOC106562833	outer dense fiber protein 2-like
gene37738:100195104	669.057	0.596181	0.240344	0.0131188	0.205827	100195104	tcpb	T-complex protein 1 subunit beta
gene3877:100195262	920.025	0.358241	0.144438	0.0131291	0.20587	100195262	lyric	LYRIC protein
gene73433:106592792	147.95	-0.725583	0.292733	0.0131879	0.206672	106592792	LOC106592792	thyroid receptor-interacting protein 11-like
gene65167:106594394	26.7575	-0.898922	0.362706	0.0131982	0.206714	106594394	LOC106594394	WAS/WASL-interacting protein family member 1-like
gene36602:106575511	228.56	-0.492303	0.198734	0.0132418	0.207276	106575511	LOC106575511	guanine nucleotide exchange factor DBS-like
gene29397:106568332	92.79	-0.60247	0.243335	0.0132906	0.207919	106568332	LOC106568332	aryl hydrocarbon receptor-like
gene9574:106603045	49.1668	-0.845801	0.341681	0.0133082	0.208074	106603045	LOC106603045	zinc finger and BTB domain-containing protein 20-like
gene9132:106602702	22.7692	-1.20986	0.488912	0.0133385	0.208426	106602702	LOC106602702	leucine-rich repeats and immunoglobulin-like domains protein 1
gene38510:106577415	316.018	-0.56652	0.228963	0.0133502	0.208489	106577415	LOC106577415	exocyst complex component 6-like
gene26403:106565575	145.015	-0.518528	0.209622	0.0133746	0.208629	106565575	LOC106565575	testis-expressed sequence 264 protein-like
gene38231:106577119	464.809	0.372977	0.150779	0.0133731	0.208629	106577119	pnpt1	polyribonucleotide nucleotidyltransferase 1
gene20246:106613233	1958.54	-0.483912	0.195675	0.013397	0.208857	106613233	LOC106613233	dipeptidyl peptidase 1-like
gene1075:100380614	75.964	-0.681314	0.27567	0.0134553	0.209591	100380614	ikzf1	IKAROS family zinc finger 1
gene18301:100286576	76.3876	0.638967	0.258634	0.0134907	0.209591	100286576	gbg2	Guanine nucleotide-binding protein GI/GS/GO subunit gamma-2
gene24122:106563240	1834.97	-0.729505	0.295225	0.013473	0.209591	106563240	mamdc4	MAM domain containing 4
gene42245:106581192	33.9739	1.03795	0.4201	0.0134842	0.209591	106581192	LOC106581192	calfacilitin-like
gene48519:106587208	37.088	1.34514	0.544435	0.0134848	0.209591	106587208	LOC106587208	AT-rich interactive domain-containing protein 3B-like
gene9380:106602839	517.724	0.460688	0.186468	0.0134887	0.209591	106602839	crcp	CGRP receptor component
gene20535:106613533	227.133	1.01645	0.411708	0.0135544	0.209757	106613533	LOC106613533	galectin-3-binding protein A-like
gene2414:106565043	34.39	-0.860519	0.348543	0.0135529	0.209757	106565043	LOC106565043	RING finger protein 208-like
gene4034:100195405	60.8936	1.00972	0.408872	0.013529	0.209757	100195405	ccne2	cyclin E2
gene51827:106590284	39.1904	-0.755333	0.305948	0.0135558	0.209757	106590284	LOC106590284	TGF-beta receptor type-1-like
gene59872:106596683	107.648	0.947694	0.383808	0.013542	0.209757	106596683	LOC106596683	nectin-4-like
gene62647:106599339	42.7358	-0.755214	0.305844	0.0135388	0.209757	106599339	LOC106599339	transmembrane channel-like protein 6
gene8563:106602207	38.3038	-0.771938	0.312647	0.0135475	0.209757	106602207	LOC106602207	semaphorin-4F-like
gene11423:106604765	2205.35	0.406973	0.164905	0.0135902	0.209996	106604765	LOC106604765	tubulin beta-4B chain-like
gene36091:106575023	23.5471	1.08582	0.439989	0.0135936	0.209996	106575023	pibf1	progesterone immunomodulatory binding factor 1
gene40061:100195300	1819.13	0.335478	0.135942	0.0135946	0.209996	100195300	paps2	Bifunctional 3-phosphoadenosine 5-phosphosulfate synthetase 2
gene30208:106569063	101.561	-0.754314	0.305742	0.013619	0.210254	106569063	LOC106569063	uncharacterized LOC106569063
gene51692:106590144	81.0599	0.88456	0.358569	0.0136282	0.210275	106590144	LOC106590144	myomesin-1-like
gene43864:106582703	419.28	-0.539439	0.218698	0.0136405	0.210344	106582703	LOC106582703	SAM pointed domain-containing Ets transcription factor-like
gene18812:106611702	691.435	0.544108	0.220625	0.013655	0.210448	106611702	LOC106611702	pre-mRNA-processing factor 19-like
gene39535:106578445	366.499	0.391359	0.158747	0.0136896	0.210861	106578445	LOC106578445	serine-rich adhesin for platelets-like
gene29532:106568460	235.834	-0.634679	0.257469	0.0136986	0.210879	106568460	LOC106568460	zinc finger protein 462-like
gene47187:106585939	30.4771	1.79672	0.729018	0.0137174	0.211047	106585939	LOC106585939	endothelial lipase-like
gene20715:106613694	400.086	0.631103	0.256112	0.0137331	0.211168	106613694	LOC106613694	lipoprotein lipase-like
gene15130:106608294	17.4447	1.1137	0.452063	0.0137555	0.211393	106608294	LOC106608294	proto-oncogene c-Fos-like
gene13450:106606806	453.391	0.348475	0.141474	0.0137712	0.211456	106606806	gtf2f1	general transcription factor IIF subunit 1
gene26680:106565820	455.094	0.540051	0.219259	0.0137753	0.211456	106565820	LOC106565820	dolichyl-diphosphooligosaccharide--protein glycosyltransferase subunit 1-like
gene37194:106576086	423.847	0.491631	0.19965	0.0137987	0.211464	106576086	LOC106576086	synaptophysin-like protein 1
gene51382:106589826	97.8226	0.604809	0.245595	0.0137925	0.211464	106589826	LOC106589826	ATP-dependent RNA helicase SUPV3L1, mitochondrial-like
gene9607:106603180	56.1186	1.09969	0.446584	0.0137993	0.211464	106603180	tmprss15	transmembrane protease, serine 15
gene10511:100196849	203.506	0.488943	0.198609	0.0138225	0.211699	100196849	supt4h1	SPT4 homolog, DSIF elongation factor subunit
gene18096:106611161	19.7906	-1.20897	0.491206	0.0138467	0.211949	106611161	LOC106611161	uncharacterized LOC106611161
gene12489:106605836	16.9544	-1.48991	0.605452	0.013862	0.21202	106605836	LOC106605836	CD209 antigen-like protein E
gene29950:106568981	813.411	0.483667	0.196558	0.013867	0.21202	106568981	LOC106568981	60S ribosomal protein L5-like
gene35696:106574607	68.4062	0.8591	0.34923	0.0138944	0.212079	106574607	LOC106574607	uncharacterized LOC106574607
gene42421:106581278	300.513	0.586816	0.238507	0.013879	0.212079	106581278	LOC106581278	serpin H1-like
gene844:106602308	267.667	-0.393624	0.160011	0.0138944	0.212079	106602308	LOC106602308	MAX gene-associated protein-like
gene38628:106577530	225.818	0.580818	0.236198	0.0139311	0.212519	106577530	LOC106577530	RNA-binding protein 4.1-like
gene25644:106564975	48.0652	-0.933882	0.379884	0.0139583	0.212728	106564975	LOC106564975	integrin alpha-X-like
gene30759:106569651	152.444	0.595657	0.242327	0.0139685	0.212728	106569651	pask	PAS domain containing serine/threonine kinase
gene4402:106584263	20.2614	-1.12137	0.456196	0.0139682	0.212728	106584263	gmeb1	glucocorticoid modulatory element binding protein 1
gene1909:106613909	196.697	-0.515552	0.209776	0.0139856	0.212869	106613909	LOC106613909	disintegrin and metalloproteinase domain-containing protein 9-like
gene12578:106605928	24.4382	-1.01649	0.413756	0.0140206	0.212921	106605928	LOC106605928	uncharacterized LOC106605928
gene28286:106567157	56.4709	0.837926	0.341042	0.0140118	0.212921	106567157	LOC106567157	hematopoietic progenitor cell antigen CD34-like
gene41689:106580579	228.014	0.59829	0.243513	0.0140137	0.212921	106580579	aebp1	AE binding protein 1
gene45189:106583950	82.4515	-0.73924	0.300845	0.0140021	0.212921	106583950	LOC106583950	insulin receptor-like
gene10097:106603483	189.586	0.546444	0.222499	0.0140514	0.213115	106603483	LOC106603483	drebrin-like
gene12800:106606146	79.5226	-0.760668	0.309768	0.0140647	0.213115	106606146	LOC106606146	protein Jumonji-like
gene14780:106607964	59.1389	0.68231	0.27782	0.0140514	0.213115	106607964	cep57l1	centrosomal protein 57 like 1
gene31161:106570159	803.352	-0.809343	0.329591	0.014065	0.213115	106570159	LOC106570159	ladderlectin-like
gene11036:106604374	127.062	-0.544945	0.222017	0.0141074	0.21342	106604374	LOC106604374	girdin-like
gene11221:106604575	80.4054	0.671548	0.27365	0.0141262	0.21342	106604575	guf1	GUF1 homolog, GTPase
gene22766:106561922	154.327	0.869191	0.354213	0.0141329	0.21342	106561922	LOC106561922	transcription factor E2F8-like
gene2505:106567141	302.951	0.739555	0.301409	0.0141412	0.21342	106567141	LOC106567141	HAUS augmin-like complex subunit 4
gene25118:106564261	89.5878	0.843464	0.34359	0.014094	0.21342	106564261	LOC106564261	histone chaperone asf1b-B-like
gene25518:106564678	68.4548	-0.875941	0.356954	0.0141304	0.21342	106564678	LOC106564678	phosphoinositide 3-kinase regulatory subunit 5-like
gene31592:106570460	4559.72	0.753699	0.307197	0.0141484	0.21342	106570460	LOC106570460	collagen alpha-2(I) chain
gene41510:106580398	120.313	-0.526915	0.214729	0.0141332	0.21342	106580398	LOC106580398	serine incorporator 5-like
gene1020:106605260	17.8894	1.30539	0.532184	0.0141714	0.213648	106605260	LOC106605260	ubiquitin domain-containing protein 1-like
gene7363:106600997	240.013	0.457457	0.186524	0.0141856	0.213742	106600997	LOC106600997	methyltransferase-like protein 2-A
gene6803:106600477	426.614	0.649644	0.264939	0.0142044	0.213906	106600477	LOC106600477	supervillin-like
gene50312:106588777	269.605	-0.589461	0.240494	0.0142442	0.214386	106588777	LOC106588777	synaptotagmin-like protein 1
gene47374:106586145	343.943	-0.456043	0.186104	0.014267	0.214609	106586145	LOC106586145	signal transducer and activator of transcription 4-like
gene11765:106605120	231.167	0.439728	0.17956	0.0143287	0.214795	106605120	LOC106605120	28S ribosomal protein S15, mitochondrial-like
gene13994:100196387	51.6253	0.711008	0.290322	0.0143242	0.214795	100196387	nol12	nucleolar protein 12
gene16717:106609803	238.806	0.932981	0.381147	0.0143721	0.214795	106609803	LOC106609803	23 kDa integral membrane protein-like
gene1704:106613006	76.1095	-0.982256	0.40115	0.0143411	0.214795	106613006	crtac1	cartilage acidic protein 1
gene20079:106613092	317.089	-0.397419	0.16223	0.0142961	0.214795	106613092	LOC106613092	kinase suppressor of Ras 1-like
gene21683:106561039	476.152	-0.478	0.195297	0.0143828	0.214795	106561039	LOC106561039	GRAM domain-containing protein 4-like
gene28160:106567055	1320.98	0.483221	0.19735	0.0143433	0.214795	106567055	LOC106567055	proliferation-associated protein 2G4-like
gene32495:106571302	96.764	0.809953	0.33084	0.0143584	0.214795	106571302	LOC106571302	nucleoporin Nup43-like
gene33662:106572525	25.5029	-1.37663	0.56243	0.0143794	0.214795	106572525	LOC106572525	serine/threonine-protein phosphatase 6 regulatory ankyrin repeat subunit C-like
gene45720:100194965	3046.07	0.333484	0.136206	0.0143498	0.214795	100194965	ef2	Elongation factor 2
gene65022:106594047	31.9389	-0.856891	0.349927	0.0143345	0.214795	106594047	LOC106594047	gamma-secretase-activating protein-like
gene67550:106593568	57.0157	-1.30087	0.531199	0.0143283	0.214795	106593568	LOC106593568	GTPase IMAP family member 4-like
gene9658:106603109	195.013	0.72309	0.295366	0.0143607	0.214795	106603109	LOC106603109	interleukin-13 receptor subunit alpha-2-like
gene39846:106578758	937.588	0.38767	0.158443	0.0144154	0.215043	106578758	LOC106578758	peptidyl-prolyl cis-trans isomerase A-like
gene9720:106603189	94.7147	0.699601	0.28591	0.014408	0.215043	106603189	LOC106603189	28S ribosomal protein S12, mitochondrial-like
gene10366:106603814	102.268	-0.631124	0.258032	0.0144485	0.215418	106603814	LOC106603814	transcription factor 7-like 2
gene37990:106576715	18.0705	1.09674	0.448501	0.0144715	0.215643	106576715	ninl	ninein like
gene45052:100286536	362.347	-0.575693	0.235445	0.0144801	0.215651	100286536	cl012	CL012 protein
gene1308:106607512	41169.9	-0.667012	0.272862	0.0145051	0.215904	106607512	LOC106607512	deleted in malignant brain tumors 1 protein-like
gene25533:106564665	237.706	-0.453542	0.185559	0.0145177	0.215973	106564665	LOC106564665	septin-9-like
gene42939:100196074	438.901	-0.376642	0.154125	0.0145358	0.216123	100196074	dapl1	death associated protein like 1
gene35679:106574468	688.838	0.321217	0.131484	0.0145656	0.216446	106574468	LOC106574468	propionyl-CoA carboxylase beta chain, mitochondrial-like
gene3700:106577300	113.315	-0.804157	0.329244	0.0145886	0.216613	106577300	LOC106577300	sphingosine kinase 2-like
gene51200:106589644	311.939	0.382937	0.156792	0.0145928	0.216613	106589644	LOC106589644	cytochrome c oxidase assembly factor 3 homolog, mitochondrial
gene23511:106562654	137.414	0.505568	0.207031	0.0146065	0.216673	106562654	mthfs	methenyltetrahydrofolate synthetase
gene4086:106580864	468.194	-0.772978	0.316556	0.0146129	0.216673	106580864	LOC106580864	cathepsin K-like
gene17972:106610985	175.497	0.714179	0.292512	0.0146248	0.21673	106610985	kif15	kinesin family member 15
gene21253:106560435	232.341	0.627232	0.256961	0.0146482	0.216957	106560435	LOC106560435	nuclear autoantigenic sperm protein-like
gene69690:101448004	88.9443	0.664096	0.272125	0.0146708	0.217173	101448004	as1la	Histone chaperone asf1-A
gene22365:106561518	125.139	-0.584801	0.239697	0.0146974	0.217362	106561518	LOC106561518	E3 ubiquitin-protein ligase AMFR-like
gene28910:106567977	116.539	0.614883	0.252033	0.0146997	0.217362	106567977	LOC106567977	mitochondrial import inner membrane translocase subunit Tim22-like
gene13836:106607024	199.141	-0.482907	0.19803	0.0147463	0.217693	106607024	LOC106607024	serine/threonine-protein kinase N1-like
gene16287:106609453	72.1334	0.835936	0.342745	0.0147301	0.217693	106609453	LOC106609453	RAD51-associated protein 1-like
gene26789:106565722	1878.73	0.423713	0.173746	0.0147406	0.217693	106565722	LOC106565722	dolichyl-diphosphooligosaccharide--protein glycosyltransferase subunit 2-like
gene50769:106589283	102.529	-0.944521	0.387401	0.0147648	0.217847	106589283	LOC106589283	src kinase-associated phosphoprotein 1-like
gene32522:106571364	23.0988	-1.44883	0.594577	0.0148206	0.218551	106571364	LOC106571364	interleukin-22 receptor subunit alpha-1-like
gene58132:106593719	60.7169	-1.21031	0.496977	0.0148773	0.219268	106593719	LOC106593719	endonuclease domain-containing 1 protein-like
gene9175:106602746	49.2382	0.872192	0.358205	0.0148961	0.219425	106602746	mnd1	meiotic nuclear divisions 1
gene26332:106565441	274.616	0.510416	0.209677	0.0149207	0.219548	106565441	timeless	timeless circadian regulator
gene8686:100194720	137.864	2.33987	0.961154	0.0149148	0.219548	100194720	LOC100194720	uncharacterized LOC100194720
gene30499:100380622	331.37	0.719051	0.295415	0.0149315	0.219586	100380622	hgv2	HGV2 protein
gene15745:106608863	704.36	-0.389352	0.160031	0.0149751	0.220107	106608863	LOC106608863	fatty-acid amide hydrolase 2-A-like
gene14655:106607833	55.925	0.704565	0.289678	0.0150058	0.22036	106607833	LOC106607833	protein stum homolog
gene21808:106560933	260.654	-0.415527	0.170882	0.0150299	0.22036	106560933	slc7a5	solute carrier family 7 member 5
gene22817:106561971	52.3493	-0.780164	0.320779	0.0150119	0.22036	106561971	LOC106561971	anoctamin-1-like
gene29273:106568192	627.469	0.414742	0.170606	0.0150576	0.22036	106568192	LOC106568192	serine/arginine-rich splicing factor 9-like
gene32652:106571462	36.2985	1.27231	0.523227	0.0150294	0.22036	106571462	LOC106571462	tumor necrosis factor receptor superfamily member 21-like
gene48387:106587149	17.3617	-1.36845	0.562888	0.0150518	0.22036	106587149	LOC106587149	probable G-protein coupled receptor 97
gene8498:106602133	36.5969	-1.03053	0.423903	0.0150552	0.22036	106602133	LOC106602133	dynein heavy chain 6, axonemal-like
rna133441	3168.48	-0.520141	0.213941	0.0150475	0.22036	rna133441	NA	NA
gene11728:100136501	27.0068	-1.0341	0.425473	0.0150792	0.220475	100136501	LOC100136501	hemicentin-1
gene27751:106566626	209.235	-0.575386	0.236782	0.0150981	0.220475	106566626	LOC106566626	transmembrane and coiled-coil domains protein 1-like
gene44922:106583719	251.064	0.601606	0.24754	0.0150849	0.220475	106583719	LOC106583719	DNA replication licensing factor mcm2
gene47375:100306754	51.9857	-0.724215	0.298017	0.0150942	0.220475	100306754	cxcr4	C-X-C chemokine receptor type 4
gene41068:106580112	200.496	0.554746	0.228309	0.0151071	0.220487	106580112	pole	DNA polymerase epsilon, catalytic subunit
gene15204:106608385	2789.02	0.413166	0.170131	0.0151605	0.220908	106608385	hadhb	hydroxyacyl-CoA dehydrogenase trifunctional multienzyme complex subunit beta
gene19117:106612100	337.255	-0.409879	0.168766	0.0151535	0.220908	106612100	LOC106612100	autophagy-related protein 2 homolog A-like
gene9852:106603317	26.534	-1.00911	0.415489	0.0151523	0.220908	106603317	LOC106603317	APC membrane recruitment protein 1-like
gene12153:106605502	29.9982	-1.13738	0.468479	0.0151897	0.220936	106605502	LOC106605502	uncharacterized LOC106605502
gene24827:100286715	535.533	0.454709	0.187274	0.0151805	0.220936	100286715	ufc1	ubiquitin-fold modifier conjugating enzyme 1
gene47721:106586484	88.4929	0.555779	0.228933	0.0151952	0.220936	106586484	LOC106586484	CCR4-NOT transcription complex subunit 11-like
gene6308:106599547	293.322	-0.470594	0.193822	0.0151834	0.220936	106599547	LOC106599547	integral membrane protein 2C-like
gene33909:106572760	2020.01	0.351751	0.14493	0.0152229	0.22122	106572760	LOC106572760	keratin, type I cytoskeletal 18-like
gene10075:100195469	217.136	-0.436951	0.180115	0.0152681	0.221509	100195469	trpv1	transient receptor potential cation channel subfamily V member 1
gene37486:106576415	197.988	-0.432414	0.178272	0.0152838	0.221509	106576415	LOC106576415	transmembrane 7 superfamily member 3-like
gene43460:106582297	43.7614	0.866457	0.35712	0.0152565	0.221509	106582297	LOC106582297	BRCA1-associated RING domain protein 1-like
gene48236:100195155	69.7714	-0.70332	0.289941	0.0152775	0.221509	100195155	dok2	docking protein 2
gene62007:106595213	434.282	-0.678094	0.279557	0.0152829	0.221509	106595213	pgm2	phosphoglucomutase 2
gene17879:106611065	54.2926	-0.74173	0.306002	0.0153531	0.222394	106611065	LOC106611065	RAS guanyl-releasing protein 1-like
gene22582:106561744	149.22	-0.473138	0.195328	0.0154238	0.222819	106561744	LOC106561744	zinc finger protein aebp2-like
gene24048:106563303	168.494	-0.739851	0.305418	0.0154173	0.222819	106563303	LOC106563303	TNF receptor-associated factor 2-like
gene24315:106563475	957.095	0.327544	0.135218	0.0154211	0.222819	106563475	LOC106563475	EH domain-containing protein 1-like
gene38643:106577544	176.37	0.761625	0.314346	0.0153978	0.222819	106577544	LOC106577544	serine/threonine-protein phosphatase PP1-beta catalytic subunit
gene41754:100196442	30.7107	-0.913822	0.377182	0.015403	0.222819	100196442	ga45g	Growth arrest and DNA-damage-inducible protein GADD45 gamma
gene6412:106599366	274.696	0.440915	0.182124	0.0154796	0.223506	106599366	LOC106599366	zinc finger SWIM domain-containing protein 5-like
gene18763:106611740	32.0723	1.05624	0.436395	0.0155039	0.223738	106611740	LOC106611740	PCTP-like protein
gene10307:106603750	32.6834	1.20343	0.497949	0.0156585	0.224098	106603750	LOC106603750	L-asparaginase-like
gene10736:100194733	5660.02	0.428576	0.177289	0.0156327	0.224098	100194733	ef-1g	elongation factor 1 gamma
gene15250:106608430	16.9051	-1.25437	0.519208	0.015695	0.224098	106608430	LOC106608430	toll-like receptor 2
gene15481:106608591	78.1169	0.694501	0.28731	0.0156381	0.224098	106608591	LOC106608591	menin-like
gene16010:106609106	639.085	0.367517	0.1519	0.015543	0.224098	106609106	LOC106609106	cysteine-rich with EGF-like domain protein 2
gene18167:100194616	92.5496	0.83799	0.346637	0.015628	0.224098	100194616	cf12	cofilin 2
gene23946:106563019	194.056	0.629549	0.260581	0.0156945	0.224098	106563019	LOC106563019	tenascin-like
gene24689:106563836	207.638	-0.790525	0.327133	0.0156696	0.224098	106563836	LOC106563836	GTPase IMAP family member 8-like
gene29250:106568201	248.329	0.468034	0.193587	0.0156191	0.224098	106568201	LOC106568201	coronin-1C-like
gene30571:100195068	61.3865	0.652231	0.269686	0.0155855	0.224098	100195068	tgm1	transglutaminase 1 (K polypeptide epidermal type I, protein-glutamine-gamma-glutamyltransferase)
gene34141:106572990	1129.06	0.598669	0.247506	0.0155716	0.224098	106572990	LOC106572990	60S ribosomal protein L10-like
gene38704:106577590	756.322	0.615138	0.254556	0.0156698	0.224098	106577590	LOC106577590	histone H2A.Z
gene38997:100195310	185.726	0.510151	0.21105	0.01564	0.224098	100195310	cq049	potential DNA-binding protein C17orf49 homolog
gene3975:106580016	256.176	0.38701	0.160016	0.0155813	0.224098	106580016	LOC106580016	probable assembly chaperone of rpl4
gene41264:100196186	108.659	0.57549	0.237978	0.0155957	0.224098	100196186	pop5	POP5 homolog, ribonuclease P/MRP subunit
gene42488:106581345	69.9998	-0.783133	0.324114	0.0156822	0.224098	106581345	LOC106581345	protocadherin Fat 3-like
gene45269:100194572	143.565	0.453779	0.187744	0.0156483	0.224098	100194572	pgm1	phosphoglucomutase 1
gene47175:106585928	323.438	-0.407128	0.168502	0.0156851	0.224098	106585928	LOC106585928	anthrax toxin receptor 2-like
gene50744:106589261	47.9601	0.770413	0.318451	0.0155526	0.224098	106589261	LOC106589261	sialidase-like
gene50787:106589304	32.0234	-1.12525	0.465661	0.0156724	0.224098	106589304	LOC106589304	thyroid hormone receptor alpha-like
gene18307:106611360	3840.89	-0.358922	0.148594	0.0157156	0.224229	106611360	LOC106611360	cathepsin B-like
gene40292:106579229	114.433	-0.539968	0.223558	0.0157208	0.224229	106579229	LOC106579229	BTB/POZ domain-containing protein KCTD5-like
gene23346:106562496	262.05	-0.905743	0.3753	0.0158051	0.225194	106562496	LOC106562496	cathepsin D-like
gene28341:106567205	242.011	-0.457745	0.189663	0.0158015	0.225194	106567205	LOC106567205	lysine-specific demethylase 5B-B-like
gene18350:106611401	105.847	0.78812	0.3266	0.0158174	0.225243	106611401	nsd2	nuclear receptor binding SET domain protein 2
gene25530:106564667	453.643	-0.572765	0.237374	0.0158253	0.225243	106564667	LOC106564667	uncharacterized LOC106564667
gene13209:106606561	30.2353	-1.06783	0.442691	0.0158592	0.225607	106606561	LOC106606561	prolactin receptor-like
gene22010:100380453	51.0099	-0.806556	0.334403	0.0158685	0.225617	100380453	zn710	Zinc finger protein 710
gene77303:106597916	17.1452	-1.28222	0.531659	0.0158766	0.225617	106597916	LOC106597916	uncharacterized LOC106597916
gene1361:106607983	271.818	0.427563	0.177303	0.0158876	0.225655	106607983	LOC106607983	polyribonucleotide nucleotidyltransferase 1, mitochondrial-like
gene12322:106605589	82.6143	-2.14189	0.888363	0.0159065	0.225734	106605589	LOC106605589	carcinoembryonic antigen-related cell adhesion molecule 18-like
gene20711:106613687	119.931	-0.513724	0.213145	0.0159434	0.225734	106613687	LOC106613687	mucosa-associated lymphoid tissue lymphoma translocation protein 1 homolog
gene25390:100286676	54.4626	0.798675	0.33131	0.0159236	0.225734	100286676	cenpm	Centromere protein M
gene31059:106570054	5482.57	-0.498945	0.207011	0.0159424	0.225734	106570054	LOC106570054	choline transporter-like protein 4
gene35921:106574843	71.3688	0.894156	0.370898	0.0159181	0.225734	106574843	LOC106574843	transcription factor Dp-1-like
gene38830:106577684	321.17	0.659948	0.273811	0.0159424	0.225734	106577684	LOC106577684	RNA-binding protein 4B-like
gene41523:100286532	73.3675	0.890545	0.369522	0.0159528	0.225749	100286532	cenph	centromere protein H
gene2242:106563398	557.276	0.3684	0.152911	0.0159858	0.226097	106563398	LOC106563398	protein PBDC1-like
gene15610:106608770	148.206	-0.588458	0.244354	0.0160305	0.22661	106608770	LOC106608770	active breakpoint cluster region-related protein-like
gene25654:100196113	1999.89	0.450342	0.187056	0.016061	0.226922	100196113	pdia1	disulfide-isomerase
gene12213:106605558	424.553	0.324779	0.134933	0.016086	0.22698	106605558	LOC106605558	platelet-activating factor acetylhydrolase IB subunit gamma-like
gene17719:106610772	539.112	0.498254	0.207014	0.0160903	0.22698	106610772	LOC106610772	cytochrome c oxidase subunit 7A2, mitochondrial-like
gene40869:106579757	85.7046	0.702355	0.291778	0.0160775	0.22698	106579757	LOC106579757	cryptochrome DASH-like
gene12200:106605544	334.072	-0.607652	0.25254	0.0161213	0.227062	106605544	LOC106605544	E3 ubiquitin-protein ligase RNF144B-like
gene20696:106613675	748.373	0.33875	0.14078	0.016118	0.227062	106613675	LOC106613675	myeloid-derived growth factor-like
gene61501:106594946	17.6991	-1.39108	0.578092	0.0161135	0.227062	106594946	LOC106594946	tyrosine-protein kinase ITK/TSK-like
gene41674:106580593	233.558	0.51879	0.215697	0.0161645	0.227466	106580593	LOC106580593	small integral membrane protein 15-like
gene7250:100195035	161.963	-0.753482	0.313282	0.0161669	0.227466	100195035	abi1	Abl interactor 1
gene35067:106573927	509.22	0.47958	0.199548	0.0162462	0.228463	106573927	LOC106573927	microtubule-associated protein 1B-like
gene20318:106613309	25.4097	-1.16151	0.483378	0.016266	0.228502	106613309	LOC106613309	P2Y purinoceptor 13-like
gene38666:106577560	144.916	-0.522378	0.217389	0.0162628	0.228502	106577560	LOC106577560	phospholipid scramblase 2-like
gene3631:106576313	309.056	0.515088	0.214471	0.0163207	0.229153	106576313	LOC106576313	zyxin-like
gene48157:106586917	53.688	0.824071	0.343175	0.0163361	0.229228	106586917	LOC106586917	tubulin alpha chain
gene51447:106589885	149.013	-0.686051	0.285716	0.0163431	0.229228	106589885	hid1	HID1 domain containing
gene56240:106596185	24.7165	-1.03074	0.429338	0.0163611	0.229361	106596185	LOC106596185	peroxisomal carnitine O-octanoyltransferase-like
gene37361:106576261	231.094	0.6392	0.266271	0.0163699	0.229366	106576261	LOC106576261	ubl carboxyl-terminal hydrolase 18-like
gene4662:106588082	153.912	-0.804905	0.335375	0.0163943	0.229588	106588082	LOC106588082	group XIIB secretory phospholipase A2-like protein
gene43534:106582367	617.449	0.443147	0.18466	0.0164039	0.229603	106582367	LOC106582367	dnaJ homolog subfamily B member 11-like
gene28708:106567586	1245.65	-0.481336	0.20064	0.0164401	0.229752	106567586	LOC106567586	glycerophosphodiester phosphodiesterase domain-containing protein 5-like
gene4484:106586334	495.696	-0.428068	0.178422	0.0164312	0.229752	106586334	LOC106586334	H-2 class II histocompatibility antigen, E-S beta chain-like
gene59829:106592044	42.8378	-0.792914	0.330501	0.0164342	0.229752	106592044	LOC106592044	lisH domain and HEAT repeat-containing protein KIAA1468 homolog
gene26832:106565982	222.636	0.463272	0.193272	0.0165301	0.230575	106565982	LOC106565982	hyaluronidase-1-like
gene32278:106571135	337.628	-0.447866	0.186832	0.0165229	0.230575	106571135	LOC106571135	serine/threonine-protein kinase PAK 6-like
gene40747:106579638	466.375	-0.406762	0.169666	0.0165108	0.230575	106579638	LOC106579638	guanine nucleotide-binding protein G(olf) subunit alpha-like
gene40938:100196583	636.84	0.39412	0.164427	0.0165331	0.230575	100196583	pebp1	phosphatidylethanolamine binding protein 1
gene19621:106612651	371.554	-0.442864	0.184779	0.0165427	0.230589	106612651	LOC106612651	sodium-dependent serotonin transporter-like
gene14059:106607343	56.6515	0.757801	0.316304	0.016584	0.230927	106607343	LOC106607343	recQ-mediated genome instability protein 2-like
gene7543:106601172	257.081	-0.810178	0.338146	0.0165778	0.230927	106601172	LOC106601172	protein NLRC3-like
gene41316:106579899	184.998	0.890486	0.37172	0.0165939	0.230946	106579899	LOC106579899	uncharacterized LOC106579899
gene25698:106564971	17.3195	-1.30722	0.545753	0.016609	0.231036	106564971	LOC106564971	myeloid-associated differentiation marker-like
gene11405:100196873	892.932	0.590309	0.246504	0.0166327	0.231221	100196873	fhl1	Four and a half LIM domains protein 1
gene20844:106613808	419.686	0.529966	0.221321	0.0166404	0.231221	106613808	chaf1a	chromatin assembly factor 1 subunit A
gene21219:106560404	22.9287	1.17147	0.489323	0.0166628	0.231221	106560404	rhpn1	rhophilin Rho GTPase binding protein 1
gene2678:106568217	16.6455	1.36374	0.569597	0.0166555	0.231221	106568217	f2r	coagulation factor II thrombin receptor
gene60920:106592598	24.285	-1.33227	0.556502	0.0166651	0.231221	106592598	LOC106592598	uncharacterized LOC106592598
gene16677:106609764	671.902	0.463334	0.193668	0.0167379	0.231516	106609764	LOC106609764	nucleosome assembly protein 1-like 1-A
gene20477:106613482	81.7898	0.782346	0.326929	0.0167105	0.231516	106613482	LOC106613482	kinesin-like protein KIF14
gene28170:106567064	26.7626	-1.01971	0.42607	0.0166982	0.231516	106567064	LOC106567064	nuclear receptor subfamily 1 group D member 1-like
gene39038:106577923	22.4832	-1.09933	0.459421	0.0167177	0.231516	106577923	LOC106577923	myotubularin-related protein 1-like
gene39196:106578087	751.238	-0.43575	0.182136	0.0167364	0.231516	106578087	LOC106578087	bcl2-associated agonist of cell death-like
gene43794:106582647	328.48	0.435063	0.181847	0.0167357	0.231516	106582647	LOC106582647	ubiquinol-cytochrome-c reductase complex assembly factor 1
gene42220:106581211	123.571	-0.487358	0.203727	0.0167475	0.231531	106581211	LOC106581211	flotillin-2
gene50506:106588939	6357.47	0.733115	0.306511	0.0167655	0.231661	106588939	col1a2	collagen type I alpha 2 chain
gene19287:106612273	315.228	0.47035	0.196723	0.0168058	0.23198	106612273	LOC106612273	DNA-directed RNA polymerase II subunit RPB7
gene63768:106592120	24.4197	-1.00476	0.420218	0.0168007	0.23198	106592120	LOC106592120	gastrula zinc finger protein XlCGF17.1-like
gene14549:106607753	26.8064	-0.928829	0.388562	0.0168289	0.23218	106607753	LOC106607753	protein THEMIS-like
gene15285:106608478	18.6896	-1.14428	0.478979	0.0168948	0.232511	106608478	LOC106608478	transcriptional-regulating factor 1-like
gene42645:100195711	24.3583	-1.06998	0.447766	0.0168667	0.232511	100195711	aaad	Arylacetamide deacetylase
gene4822:106588599	36.2364	-0.827625	0.346361	0.0168718	0.232511	106588599	LOC106588599	inositol 1,4,5-trisphosphate receptor-interacting protein-like
gene51622:106590065	37.5126	-0.849593	0.35563	0.0168952	0.232511	106590065	LOC106590065	semaphorin-4F-like
gene67683:106596031	19.777	-1.02434	0.428781	0.0168959	0.232511	106596031	LOC106596031	putative HERC2-like protein 3
gene16281:106609458	134.314	0.71802	0.30079	0.0169813	0.233284	106609458	LOC106609458	ubl carboxyl-terminal hydrolase 18-like
gene40718:106579582	88.2609	-2.29118	0.959859	0.0169867	0.233284	106579582	LOC106579582	sodium channel protein type 4 subunit alpha B-like
gene43958:106582801	514.898	0.453446	0.189962	0.0169849	0.233284	106582801	LOC106582801	WD repeat-containing protein 82-like
gene48324:106587092	143.512	0.532569	0.223096	0.0169786	0.233284	106587092	LOC106587092	fin bud initiation factor-like
gene15858:106608962	53.9577	0.920277	0.385733	0.0170427	0.233934	106608962	LOC106608962	PC-esterase domain-containing protein 1A-like
gene12420:106605770	119.395	0.619209	0.25959	0.0170638	0.234104	106605770	LOC106605770	ubiquitin-conjugating enzyme E2 S
gene27236:100380341	313.795	0.651667	0.27323	0.017077	0.234167	100380341	mcm2	MCM2 minichromosome maintenance deficient 2, mitotin (S. cerevisiae)
gene22400:100136366	105.882	-1.09974	0.461378	0.0171446	0.234975	100136366	LOC100136366	cystic fibrosis transmembrane conductance regulator II
gene47003:106585785	202.579	0.578007	0.242563	0.017176	0.235166	106585785	LOC106585785	PHD finger protein 19-like
gene63546:106591294	28.8228	-1.03965	0.436289	0.0171752	0.235166	106591294	LOC106591294	transmembrane 9 superfamily member 2-like
gene1514:106609766	280.968	0.426792	0.179239	0.0172594	0.236188	106609766	LOC106609766	ATP synthase mitochondrial F1 complex assembly factor 2-like
gene25417:106564567	592.948	0.40985	0.172176	0.0172934	0.236413	106564567	LOC106564567	peroxiredoxin-1-like
gene47557:106586314	106.398	-0.824929	0.346522	0.0172847	0.236413	106586314	LOC106586314	uncharacterized LOC106586314
gene19720:106612565	143.894	0.516042	0.216828	0.0173147	0.236584	106612565	LOC106612565	39S ribosomal protein L44, mitochondrial-like
gene13294:100194883	971.059	0.555771	0.23355	0.0173285	0.236651	100194883	rs2	40S ribosomal protein S2
gene44320:106583240	2445.87	0.552478	0.232184	0.0173371	0.236651	106583240	LOC106583240	myosin light polypeptide 6
gene55687:106598969	2736.08	-0.595652	0.250366	0.0173539	0.23676	106598969	LOC106598969	actin-1
gene21728:106561008	35.8027	0.87025	0.366063	0.0174387	0.237677	106561008	LOC106561008	AFG3-like protein 1
gene46749:106585457	848.978	0.445824	0.187529	0.0174372	0.237677	106585457	LOC106585457	prostaglandin E synthase 2-like
gene58327:106591819	19.209	-1.48184	0.623385	0.0174501	0.237712	106591819	LOC106591819	RAS guanyl-releasing protein 1-like
gene10653:106604083	424.342	-0.656961	0.276445	0.0174795	0.237752	106604083	LOC106604083	multidrug resistance-associated protein 9-like
gene39436:106578343	16.3451	-1.13908	0.47929	0.0174726	0.237752	106578343	LOC106578343	zinc finger protein 281-like
gene7667:106601288	70.7587	0.687539	0.289287	0.0174699	0.237752	106601288	LOC106601288	ribonucleoprotein PTB-binding 1-like
gene21265:106560448	128.889	-0.460937	0.194003	0.017505	0.23798	106560448	syde2	synapse defective Rho GTPase homolog 2
gene10702:100196608	2068.95	0.551443	0.232164	0.0175381	0.238085	100196608	ssp2	Sporozoite surface protein 2
gene10868:106604228	457.387	0.483223	0.203445	0.0175392	0.238085	106604228	LOC106604228	heat shock 70 kDa protein 4-like
gene52011:106590472	426.049	0.480097	0.2021	0.017523	0.238085	106590472	LOC106590472	N-alpha-acetyltransferase 50-like
gene25825:106564787	49.9857	-0.707275	0.2978	0.0175489	0.238097	106564787	LOC106564787	heterogeneous nuclear ribonucleoprotein L-like
gene12130:106605391	51.8963	0.960317	0.404532	0.0176016	0.238689	106605391	LOC106605391	regulating synaptic membrane exocytosis protein 2-like
gene18240:106611299	104.216	0.817609	0.344443	0.0176103	0.238689	106611299	oip5	Opa interacting protein 5
gene47198:106585949	33.7051	-0.944911	0.39816	0.017635	0.23885	106585949	LOC106585949	WD repeat and FYVE domain-containing protein 3-like
gene52840:106594364	73.5565	-0.637603	0.26868	0.0176398	0.23885	106594364	LOC106594364	rhophilin-2-like
gene16925:106610014	112.044	0.768576	0.324121	0.0177276	0.239168	106610014	LOC106610014	synaptopodin-2-like
gene23815:106562962	1223.96	0.583238	0.245989	0.0177403	0.239168	106562962	LOC106562962	collagen alpha-1(V) chain-like
gene24260:106563523	139.833	-0.788904	0.332603	0.0176965	0.239168	106563523	LOC106563523	transcription factor PU.1-like
gene26652:100136920	118.977	1.21942	0.51432	0.0177431	0.239168	100136920	mx2	myxovirus resistance 2
gene2979:100136908	123.743	-0.597114	0.251779	0.0177121	0.239168	100136908	nkcc1a	Na/K/2Cl co-transporter
[truncated: 79,599 more rows]
