# Supplementary material for: Mid and hindgut transcriptome profiling analysis of Atlantic salmon (Salmon salar) under unpredictable chronic stress
Source: R Soc Open Sci. 2020 Feb 26;7(2):191480. doi: 10.1098/rsos.191480 (PMC7062075; doi:10.1098/rsos.191480)
Supplement: Supplementary table 4 [file rsos191480supp7.xlsx]

## Sheet: Ctrl_Midgut_Vs_CS_Midgut_DE_dat
List of all expressed genes discovered in the midgut, including the differential expression results - log fold change difference and adjusted p values - between CS and control groups. Genes are annotated with Entrez ID, gene symbol and gene description.
Gene	baseMean	log2FoldChange	lfcSE	pvalue	padj	ENTREZID	SYMBOL	GENENAME
gene17472:106610526	461.188	-5.03227	0.460413	8.29322e-28	1.91532e-23	106610526	LOC106610526	von Willebrand factor A domain-containing protein 7-like
gene11701:106605061	135.914	-2.4123	0.312429	1.15313e-14	1.33158e-10	106605061	LOC106605061	plectin-like
gene50426:106588846	296.553	-2.48429	0.328891	4.23528e-14	3.26046e-10	106588846	LOC106588846	homeobox protein Hox-A9-like
gene61560:106597810	48.3554	-4.25017	0.595184	9.26996e-13	5.35225e-09	106597810	LOC106597810	mucin-2-like
gene14967:106608185	6721.34	-3.11746	0.443701	2.12495e-12	9.81513e-09	106608185	LOC106608185	phospholipase B1, membrane-associated-like
gene51222:100195417	762.62	-3.62811	0.524694	4.68812e-12	1.80453e-08	100195417	agt	angiotensinogen
gene6051:106598496	126.516	-2.63779	0.389572	1.27909e-11	4.2201e-08	106598496	LOC106598496	relaxin-like
gene58411:106597977	247.695	-2.20981	0.341045	9.20105e-11	2.65623e-07	106597977	LOC106597977	mucin-2-like
gene16137:106609256	37.0343	4.84528	0.812867	2.51112e-09	6.44382e-06	106609256	LOC106609256	intestine-specific homeobox-like
gene11662:106605041	36.6989	-7.52648	1.29095	5.53621e-09	1.27859e-05	106605041	LOC106605041	uncharacterized LOC106605041
gene80191:106593352	2158.74	-2.47375	0.434062	1.20466e-08	2.52923e-05	106593352	LOC106593352	mucin-2-like
gene46551:106585286	88.198	-1.32073	0.246562	8.48026e-08	0.000150655	106585286	LOC106585286	MLX-interacting protein-like
gene47787:106586577	192.998	-1.0209	0.190259	8.0569e-08	0.000150655	106586577	LOC106586577	CMP-N-acetylneuraminate-beta-galactosamide-alpha-2,3-sialyltransferase 1-like
gene6032:106598598	115.586	2.78012	0.522178	1.0146e-07	0.000167374	106598598	LOC106598598	apolipoprotein D-like
gene9956:106603600	55.1308	-1.49425	0.285642	1.68403e-07	0.000259284	106603600	LOC106603600	misshapen-like kinase 1
gene136:100380763	3608.4	-1.3043	0.250426	1.90541e-07	0.000275033	100380763	xdh	xanthine dehydrogenase
gene11842:106605237	41.9496	-2.49044	0.481551	2.31965e-07	0.000315131	106605237	LOC106605237	serine/threonine-protein kinase Nek8-like
gene36466:100195755	38.7745	4.30537	0.840163	2.98409e-07	0.000382875	100195755	c1ql2	complement component 1, q subcomponent-like 2
gene19372:106612355	326.66	-1.67542	0.328639	3.43185e-07	0.000396293	106612355	LOC106612355	collagen alpha-5(IV) chain-like
gene46064:106584796	1104.94	-2.39488	0.469209	3.32417e-07	0.000396293	106584796	LOC106584796	mucin-2-like
gene1856:106613470	67.533	-2.03614	0.400834	3.77909e-07	0.000404248	106613470	LOC106613470	glycine N-acyltransferase-like protein 3
gene2405:100286727	61.3005	1.50542	0.296565	3.85082e-07	0.000404248	100286727	ska1	spindle and kinetochore associated complex subunit 1
gene47023:106585766	1596.77	0.787543	0.155698	4.23336e-07	0.000425084	106585766	LOC106585766	cytochrome c oxidase subunit 7C, mitochondrial-like
gene34286:100195857	324.909	3.52692	0.702417	5.13709e-07	0.000467228	100195857	cbpa1	Carboxypeptidase A1
gene41980:106580821	4174.24	0.747382	0.148982	5.25998e-07	0.000467228	106580821	LOC106580821	transgelin-like
gene60536:106595494	109.668	2.27785	0.453951	5.22574e-07	0.000467228	106595494	LOC106595494	protein disulfide-isomerase A2-like
gene14582:106607913	760.269	-1.22029	0.244874	6.25e-07	0.000534607	106607913	LOC106607913	gap junction Cx32.2 protein-like
gene40922:100502565	49.3106	3.78414	0.764264	7.36995e-07	0.000607889	100502565	fep15	fep15 selenoprotein
gene14351:106607561	43.6513	-5.32387	1.07834	7.92961e-07	0.000631497	106607561	LOC106607561	rho-associated protein kinase 2-like
gene70977:106599899	715.733	-1.51096	0.307353	8.83173e-07	0.000679896	106599899	LOC106599899	mucin-2-like
gene19055:106612037	58.2419	-1.85317	0.379888	1.07061e-06	0.000753259	106612037	LOC106612037	fibroblast growth factor 20-like
gene23549:106562698	347.169	1.32831	0.271936	1.03613e-06	0.000753259	106562698	LOC106562698	cysteine--tRNA ligase, cytoplasmic-like
gene4034:100195405	45.4717	2.01282	0.413203	1.10893e-06	0.000753259	100195405	ccne2	cyclin E2
gene50425:100194471	50.4127	-2.02775	0.416032	1.09354e-06	0.000753259	100194471	hoxa7aa	homeobox protein HoxA7aa
gene1816:106612024	5862.93	-2.28592	0.470743	1.19795e-06	0.000790475	106612024	LOC106612024	ectonucleotide pyrophosphatase/phosphodiesterase family member 7-like
gene9924:106603382	38.8668	-2.07435	0.429372	1.35759e-06	0.000870935	106603382	LOC106603382	neuroligin-3-like
gene11698:106605059	650.793	0.81453	0.169037	1.44533e-06	0.000895024	106605059	LOC106605059	eukaryotic translation initiation factor 3 subunit E-like
gene1337:106607826	266.569	1.30149	0.270303	1.47265e-06	0.000895024	106607826	LOC106607826	cyclin-dependent kinase 1-like
gene14604:106607795	3786.85	-0.805878	0.168425	1.71172e-06	0.00101364	106607795	unc93a	unc-93 homolog A
gene8035:106601669	140.898	-2.05939	0.433296	2.00572e-06	0.00115805	106601669	LOC106601669	alpha-(1,3)-fucosyltransferase 9-like
gene31254:106569895	127.41	1.6098	0.340146	2.21593e-06	0.0012185	106569895	LOC106569895	T-complex protein 1 subunit gamma-like
gene9842:106603309	181.453	-1.35396	0.286042	2.20784e-06	0.0012185	106603309	LOC106603309	oligophrenin-1-like
gene53206:100137021	91.403	3.89175	0.823767	2.30876e-06	0.00124002	100137021	trp-i	trypsin I
gene27886:106566901	70.8962	1.31998	0.282575	2.99378e-06	0.00150308	106566901	LOC106566901	transcription factor E2F1-like
gene46950:106585690	376.832	-1.03831	0.222151	2.95515e-06	0.00150308	106585690	vps13a	vacuolar protein sorting 13 homolog A
gene50429:106588851	39.9969	-2.6094	0.558403	2.96874e-06	0.00150308	106588851	LOC106588851	uncharacterized LOC106588851
gene38743:106577623	289.037	-0.840648	0.180694	3.28216e-06	0.0016128	106577623	LOC106577623	receptor-type tyrosine-protein phosphatase delta-like
gene39046:106577930	207.359	-2.40611	0.519077	3.56304e-06	0.00171434	106577930	LOC106577930	zinc finger protein RFP-like
gene37954:106576749	809.763	-1.47105	0.319976	4.27835e-06	0.00197617	106576749	LOC106576749	uncharacterized LOC106576749
gene50215:106588646	485.816	1.15493	0.251132	4.24711e-06	0.00197617	106588646	LOC106588646	stathmin-like
gene6861:106600603	3330.97	-1.79861	0.39224	4.52963e-06	0.00205121	106600603	LOC106600603	uncharacterized LOC106600603
gene13628:106606868	489.058	-1.02781	0.226292	5.57382e-06	0.00242882	106606868	LOC106606868	GTPase IMAP family member 8-like
gene24448:106563597	226.64	2.19873	0.483953	5.53901e-06	0.00242882	106563597	LOC106563597	uncharacterized LOC106563597
gene12333:106605684	63.364	3.37102	0.746411	6.2928e-06	0.00269134	106605684	LOC106605684	trypsinogen-like protein 3
gene18446:100380299	271.596	0.915194	0.203004	6.53621e-06	0.0026956	100380299	actn1	actinin alpha 1
gene77471:106591457	87.1568	3.36204	0.745739	6.53383e-06	0.0026956	106591457	LOC106591457	chymotrypsin A-like
gene21462:106560654	93.9198	1.27662	0.283643	6.77007e-06	0.00270546	106560654	LOC106560654	14 kDa phosphohistidine phosphatase-like
gene30499:100380622	301.964	1.49507	0.332504	6.91153e-06	0.00270546	100380622	hgv2	HGV2 protein
gene47434:106586079	70.7375	-1.99481	0.44356	6.88324e-06	0.00270546	106586079	LOC106586079	bile salt export pump-like
gene30904:106569778	556.092	-0.81111	0.1808	7.24908e-06	0.00279029	106569778	plec	plectin
gene20350:106613338	322.357	1.38394	0.308823	7.41769e-06	0.00280839	106613338	LOC106613338	serine/threonine-protein phosphatase 5-like
gene31869:106570733	88.577	-2.00871	0.449162	7.74404e-06	0.00288466	106570733	LOC106570733	FH1/FH2 domain-containing protein 3-like
gene1546:106610005	205.139	1.53373	0.343724	8.11613e-06	0.00294593	106610005	birc5	baculoviral IAP repeat containing 5
gene41571:106580445	432.15	1.38438	0.310341	8.16364e-06	0.00294593	106580445	LOC106580445	proliferating cell nuclear antigen-like
gene24331:106563463	136.397	1.33354	0.300984	9.39751e-06	0.00333901	106563463	LOC106563463	sororin-B-like
gene29557:106568487	135.584	-1.23695	0.279645	9.72137e-06	0.00340174	106568487	sema4d	semaphorin 4D
gene18014:106610951	37.201	-1.69858	0.384738	1.01061e-05	0.00340219	106610951	LOC106610951	neuroblast differentiation-associated protein AHNAK-like
gene25597:106564748	38.1953	2.28309	0.516949	1.00327e-05	0.00340219	106564748	LOC106564748	39S ribosomal protein L45, mitochondrial-like
gene37962:106576739	636.799	-1.81451	0.411115	1.01646e-05	0.00340219	106576739	LOC106576739	transient receptor potential cation channel subfamily A member 1-like
gene31978:106570885	170.959	3.35275	0.763656	1.13147e-05	0.00373304	106570885	LOC106570885	perforin-1-like
gene13003:106606342	28.3014	1.66667	0.380278	1.17189e-05	0.00381195	106606342	LOC106606342	elongation factor Tu, mitochondrial-like
gene49223:106588001	61.8723	-1.64508	0.376242	1.22894e-05	0.00394199	106588001	LOC106588001	Krueppel-like factor 13 pseudogene
gene26023:106565211	109.331	1.33653	0.305942	1.25069e-05	0.00395681	106565211	LOC106565211	rac GTPase-activating protein 1-like
gene21501:106560721	175.919	-1.39827	0.320658	1.29689e-05	0.0039943	106560721	LOC106560721	ankyrin repeat domain-containing protein 26-like
gene41316:106579899	67.1829	-3.61441	0.828882	1.29713e-05	0.0039943	106579899	LOC106579899	uncharacterized LOC106579899
gene13797:106607055	59.8139	1.61938	0.373338	1.44062e-05	0.00421155	106607055	LOC106607055	DNA replication licensing factor mcm5-like
gene22987:106562102	325.001	-0.913649	0.21029	1.39459e-05	0.00421155	106562102	LOC106562102	protein-methionine sulfoxide oxidase MICAL2-like
gene4867:100286432	34.6771	3.92818	0.904577	1.40831e-05	0.00421155	100286432	erp27	Endoplasmic reticulum resident protein ERp27
gene51665:106590119	138.681	-0.965503	0.22246	1.42407e-05	0.00421155	106590119	LOC106590119	atypical chemokine receptor 4-like
gene16579:106609665	168.285	1.30363	0.301199	1.50373e-05	0.00423668	106609665	LOC106609665	alpha-N-acetylneuraminide alpha-2,8-sialyltransferase-like
gene34264:106573105	69.0716	1.58393	0.365598	1.4747e-05	0.00423668	106573105	LOC106573105	aurora kinase B-like
gene43695:106582520	222.517	1.13195	0.261538	1.50426e-05	0.00423668	106582520	LOC106582520	motor neuron and pancreas homeobox protein 1-like
gene17454:106610497	31066.8	-1.60425	0.371111	1.54044e-05	0.00428631	106610497	LOC106610497	von Willebrand factor A domain-containing protein 7-like
gene18807:100195812	1619.64	1.21558	0.282091	1.63864e-05	0.00445228	100195812	tbb2c	Tubulin beta-2C chain
gene51684:100196214	286.987	1.15386	0.267664	1.62626e-05	0.00445228	100196214	tyms	thymidylate synthetase
gene27980:100195150	296.578	1.10491	0.257032	1.71789e-05	0.00461334	100195150	tpx2	Targeting protein for Xklp2
gene13775:106607002	74.9452	1.6384	0.381619	1.76041e-05	0.00461933	106607002	LOC106607002	DNA replication licensing factor mcm5-like
gene32333:106571235	319.48	-1.00487	0.234191	1.78013e-05	0.00461933	106571235	LOC106571235	syndecan-1-like
gene40936:100196545	104.666	1.10979	0.258602	1.7746e-05	0.00461933	100196545	rfc5	replication factor C (activator 1) 5
gene42333:106581119	1499.2	1.24111	0.289463	1.8059e-05	0.00463413	106581119	LOC106581119	non-histone chromosomal protein HMG-14-like
gene29237:106568226	132.889	-1.57245	0.367362	1.86561e-05	0.00473475	106568226	LOC106568226	lysine-specific demethylase 2B-like
gene33661:106572526	287.053	-1.7073	0.399385	1.91282e-05	0.00475302	106572526	LOC106572526	zinc transporter ZIP10-like
gene46268:106585178	677.192	0.745586	0.174418	1.91397e-05	0.00475302	106585178	LOC106585178	60S ribosomal protein L37
gene9137:106602779	183.893	-1.07524	0.252004	1.98336e-05	0.00487294	106602779	LOC106602779	CD48 antigen-like
gene3042:106571984	292.104	-1.07504	0.253122	2.16525e-05	0.00525472	106571984	pam	peptidylglycine alpha-amidating monooxygenase
gene31843:100196793	3086.42	-1.89038	0.445498	2.2026e-05	0.00525472	100196793	slc6a19	solute carrier family 6 member 19
gene44625:106583513	75.6957	2.29055	0.539862	2.207e-05	0.00525472	106583513	LOC106583513	acidic mammalian chitinase-like
gene47922:106586678	41.0981	1.47642	0.349262	2.36565e-05	0.00557496	106586678	otc	ornithine carbamoyltransferase
gene17252:106610322	89.7091	1.14884	0.272282	2.4506e-05	0.00571682	106610322	LOC106610322	NADH dehydrogenase [ubiquinone] 1 beta subcomplex subunit 6-like
gene10382:106603835	224.041	-1.73256	0.411114	2.50544e-05	0.00572903	106603835	LOC106603835	solute carrier family 22 member 5-like
gene47600:106586370	846.153	1.34827	0.319779	2.48399e-05	0.00572903	106586370	LOC106586370	MOB-like protein phocein
gene1729:100195137	149.411	1.28049	0.304059	2.53859e-05	0.00574791	100195137	prim2	DNA primase subunit 2
gene32668:100195526	52.5093	1.65403	0.393013	2.56978e-05	0.00576204	100195526	rad51	RAD51 recombinase
gene24805:100196272	1261.13	0.8535	0.20309	2.63892e-05	0.00586018	100196272	rl23a	60S ribosomal protein L23a
gene13784:106607066	310.243	1.59703	0.381016	2.77092e-05	0.00595287	106607066	LOC106607066	importin subunit alpha-1-like
gene18240:106611299	73.8532	1.43649	0.34293	2.80336e-05	0.00595287	106611299	oip5	Opa interacting protein 5
gene23584:106562736	48.9866	-2.3937	0.571509	2.80954e-05	0.00595287	106562736	LOC106562736	b(0,+)-type amino acid transporter 1-like
gene38249:106577103	59.1352	1.42711	0.340369	2.7551e-05	0.00595287	106577103	LOC106577103	F-box only protein 5-like
gene4409:106584688	98.893	-2.83923	0.677111	2.75098e-05	0.00595287	106584688	LOC106584688	endothelin-2-like
gene45041:106583807	29.4039	1.92925	0.461328	2.89003e-05	0.00606775	106583807	cenpp	centromere protein P
gene22852:106562005	132.728	1.39843	0.335109	3.00539e-05	0.00614564	106562005	shcbp1	SHC binding and spindle associated 1
gene67000:100380294	64.8932	1.55542	0.372741	3.00696e-05	0.00614564	100380294	cnd3	Condensin complex subunit 3
gene80456:106592737	117.191	1.08625	0.260164	2.9765e-05	0.00614564	106592737	LOC106592737	60S ribosomal protein L10-like
gene32581:100196484	290.77	1.30846	0.313973	3.08068e-05	0.00619854	100196484	topk	Lymphokine-activated killer T-cell-originated protein kinase homolog
gene38028:106576686	154.645	1.69734	0.407572	3.12016e-05	0.00619854	106576686	LOC106576686	lymphocyte-specific helicase-like
gene38207:100196320	92.0518	1.19998	0.288192	3.1298e-05	0.00619854	100196320	rtkn2	rhotekin 2
gene45280:100286464	185.467	-2.49115	0.598395	3.1402e-05	0.00619854	100286464	rel3	Relaxin-3
gene10973:100194635	293.694	-0.841235	0.202702	3.32311e-05	0.00635842	100194635	4ebp	eukaryotic translation initiation factor 4E binding protein 3-2
gene17806:100195041	448.409	1.25327	0.302026	3.33132e-05	0.00635842	100195041	rbbp4	Histone-binding protein RBBP4
gene43537:106582371	323.386	-1.43348	0.345034	3.25864e-05	0.00635842	106582371	LOC106582371	DNA-binding protein SATB2-like
gene47647:106586419	15231	-1.08312	0.260827	3.28637e-05	0.00635842	106586419	LOC106586419	solute carrier family 15 member 2-like
gene67:106594936	246.483	1.1871	0.286456	3.41173e-05	0.00645852	106594936	LOC106594936	nucleolar and spindle-associated protein 1-like
gene10424:106603870	173.229	-1.07768	0.260359	3.48526e-05	0.00654406	106603870	LOC106603870	cytoplasmic polyadenylation element-binding protein 4-like
gene22744:106561901	201.522	-1.23221	0.298318	3.61959e-05	0.00674149	106561901	LOC106561901	low-density lipoprotein receptor-related protein 4-like
gene23334:106562484	192.311	1.42835	0.34605	3.66585e-05	0.00677303	106562484	dut	deoxyuridine triphosphatase
gene21053:106560239	6060.22	-1.6751	0.406742	3.81628e-05	0.006995	106560239	LOC106560239	sodium-dependent phosphate transport protein 2B-like
gene10200:106603673	306.829	1.09976	0.267579	3.95627e-05	0.0071945	106603673	ncapd3	non-SMC condensin II complex subunit D3
gene32199:100195151	472.188	1.39915	0.340602	3.99338e-05	0.00720525	100195151	mcm3	minichromosome maintenance complex component 3
gene21272:106560454	7831.05	-2.49496	0.607631	4.02502e-05	0.00720603	106560454	LOC106560454	epithelial chloride channel protein-like
gene15906:106609001	97.6163	-1.62552	0.39661	4.15784e-05	0.00738657	106609001	LOC106609001	complement C1q-like protein 2
gene13138:106606485	31.3347	1.82824	0.446607	4.24668e-05	0.00748681	106606485	LOC106606485	protein FAM195A-like
gene17650:100136513	171.199	2.79974	0.686096	4.49042e-05	0.00762545	100136513	cmpk2	cytidine/uridine monophosphate kinase 2
gene18548:106611555	288.326	-0.924724	0.226353	4.40158e-05	0.00762545	106611555	LOC106611555	rap guanine nucleotide exchange factor 2-like
gene34469:106573334	200.29	1.3514	0.33116	4.48826e-05	0.00762545	106573334	LOC106573334	PCNA-associated factor-like
gene50643:106589075	90.5928	-1.13783	0.278748	4.46642e-05	0.00762545	106589075	LOC106589075	importin subunit alpha-7-like
gene68013:106593720	77.8035	-1.33037	0.325908	4.4645e-05	0.00762545	106593720	LOC106593720	thyroid receptor-interacting protein 11-like
gene21157:106560333	123.331	-0.905229	0.222742	4.82347e-05	0.00802776	106560333	LOC106560333	protein SZT2-like
gene48162:106586921	551.965	0.730381	0.179707	4.81813e-05	0.00802776	106586921	LOC106586921	tubulin alpha chain-like
gene703:106600595	240.928	1.17168	0.288334	4.8316e-05	0.00802776	106600595	odc1	ornithine decarboxylase 1
gene14626:100194940	121.449	1.29369	0.318731	4.93072e-05	0.00813392	100194940	esco2	establishment of sister chromatid cohesion N-acetyltransferase 2
gene43535:106582370	38.6179	-1.59182	0.392347	4.96704e-05	0.00813572	106582370	LOC106582370	DNA-binding protein SATB2-like
gene32398:100194994	783.868	1.36133	0.335682	5.00443e-05	0.00813924	100194994	rir2	Ribonucleoside-diphosphate reductase subunit M2
gene28046:106566945	43.2727	-1.51517	0.374668	5.25383e-05	0.00848512	106566945	LOC106566945	phosphatidylinositol 3,4,5-trisphosphate-dependent Rac exchanger 1 protein-like
gene2829:100196856	1042.87	0.761104	0.188308	5.30428e-05	0.0085071	100196856	rl37	60S ribosomal protein L37
gene1777:106612394	116.226	1.19856	0.297891	5.73426e-05	0.0091333	106612394	dna2	DNA replication helicase/nuclease 2
gene20767:106613740	276.232	1.05548	0.262566	5.82351e-05	0.00921192	106613740	LOC106613740	cold-inducible RNA-binding protein B-like
gene17461:106610508	8751.99	-2.07434	0.516311	5.87883e-05	0.00923616	106610508	LOC106610508	von Willebrand factor A domain-containing protein 7-like
gene26843:100196476	90.0144	1.54845	0.385743	5.96457e-05	0.00927132	100196476	apitd1	apoptosis-inducing, TAF9-like domain 1
gene31059:106570054	1490.55	-2.1013	0.523552	5.9815e-05	0.00927132	106570054	LOC106570054	choline transporter-like protein 4
gene15559:106608632	187.26	1.51207	0.377173	6.09842e-05	0.009333	106608632	LOC106608632	histone H2A.Z
gene9646:106603098	180.429	1.34311	0.335038	6.10211e-05	0.009333	106603098	LOC106603098	proteasome subunit beta type-6-like
gene23084:106562248	1288.64	-0.758846	0.18945	6.18817e-05	0.00940236	106562248	LOC106562248	furin-1-like
gene11510:106604853	198.067	-0.746672	0.186574	6.28075e-05	0.00942094	106604853	LOC106604853	carnosine synthase 1-like
gene29102:106567805	110.626	0.888453	0.222005	6.28199e-05	0.00942094	106567805	LOC106567805	SH3 domain-binding glutamic acid-rich-like protein
gene27219:106566168	208.835	1.2372	0.309434	6.38094e-05	0.0095076	106566168	cssa12h12orf10	chromosome ssa12 open reading frame, human C12orf10
gene970:106603089	178.85	-1.01332	0.253541	6.42392e-05	0.00951029	106603089	ston2	stonin 2
gene30216:106569070	38.0323	1.58777	0.397577	6.50714e-05	0.00951154	106569070	LOC106569070	centromere protein L-like
gene45007:106583769	63.9937	1.14666	0.287068	6.48629e-05	0.00951154	106583769	LOC106583769	uncharacterized LOC106583769
gene46187:100194590	5658.48	1.4122	0.353785	6.56021e-05	0.00952881	100194590	cirbp	cold inducible RNA binding protein
gene17328:106610390	53.5628	1.26528	0.31791	6.89124e-05	0.00982428	106610390	LOC106610390	zinc finger protein 502-like
gene28413:106567266	7437.73	-1.04253	0.261836	6.84489e-05	0.00982428	106567266	LOC106567266	probable carboxypeptidase PM20D1.2
gene41676:106580590	51.9501	1.3588	0.341345	6.87024e-05	0.00982428	106580590	LOC106580590	elongation of very long chain fatty acids protein 7-like
gene24037:106563318	261.435	1.53599	0.386276	6.99612e-05	0.0099126	106563318	ccnb1	cyclin B1
gene8234:106601868	76.0953	1.25067	0.314785	7.09505e-05	0.00999148	106601868	LOC106601868	cyclin-F-like
gene14583:106607776	1433.72	-1.34148	0.338139	7.27071e-05	0.0100276	106607776	LOC106607776	gap junction Cx32.2 protein-like
gene16320:106609479	107.264	1.23418	0.310955	7.21791e-05	0.0100276	106609479	LOC106609479	small nuclear ribonucleoprotein F
gene19644:106612633	5181.1	0.770014	0.194039	7.23724e-05	0.0100276	106612633	LOC106612633	transgelin-like
gene48577:106587338	110.985	1.20856	0.304694	7.29438e-05	0.0100276	106587338	ccnb2	cyclin B2
gene35481:106574232	395.341	-0.958422	0.241814	7.38694e-05	0.0100948	106574232	LOC106574232	lymphocyte antigen 75-like
gene49586:100380534	189.191	-2.02367	0.510795	7.43822e-05	0.010105	100380534	bat1	HLA-B associated transcript 1
gene45258:100196728	577.403	1.24045	0.313707	7.67999e-05	0.0103725	100196728	ebp2	Probable rRNA-processing protein EBP2
gene11302:100286659	70.4614	1.38464	0.350697	7.87232e-05	0.0104075	100286659	pmf1	Polyamine-modulated factor 1
gene33869:106572697	835.239	0.914574	0.231665	7.8862e-05	0.0104075	106572697	LOC106572697	nascent polypeptide-associated complex subunit alpha-like
gene34350:106573223	1361.42	0.976078	0.24699	7.75358e-05	0.0104075	106573223	LOC106573223	NADH-cytochrome b5 reductase 2-like
gene37022:106575933	109.219	1.13022	0.286239	7.86338e-05	0.0104075	106575933	LOC106575933	ribosome biogenesis protein wdr12-like
gene6395:106599389	309.341	1.23553	0.313081	7.93457e-05	0.0104119	106599389	LOC106599389	kinesin-like protein KIF2C
gene21411:106560567	43.2417	-1.37464	0.349241	8.28259e-05	0.0108071	106560567	LOC106560567	insulin receptor-like
gene49684:100194709	703.324	-0.75907	0.193017	8.40104e-05	0.0109001	100194709	LOC100194709	plectin
gene13839:106607020	98.7281	1.78037	0.454326	8.90235e-05	0.0109362	106607020	LOC106607020	N-acetylmuramoyl-L-alanine amidase-like
gene14713:106607886	131.576	1.33776	0.340994	8.74099e-05	0.0109362	106607886	LOC106607886	uncharacterized LOC106607886
gene18047:106611136	240.172	1.82792	0.466323	8.86052e-05	0.0109362	106611136	LOC106611136	ornithine decarboxylase 1-like
gene21575:106560782	405.705	0.843951	0.215198	8.79128e-05	0.0109362	106560782	psma4	proteasome subunit alpha 4
gene281:106566099	136.095	4.75868	1.21419	8.88337e-05	0.0109362	106566099	LOC106566099	radical S-adenosyl methionine domain-containing protein 2-like
gene41447:106580333	36.8422	-1.68347	0.428518	8.54467e-05	0.0109362	106580333	LOC106580333	oxysterol-binding protein 2-like
gene47164:106585919	741.843	-0.816453	0.207856	8.56649e-05	0.0109362	106585919	LOC106585919	LMBR1 domain-containing protein 2-B-like
gene51305:106589751	145.24	1.72936	0.440561	8.65969e-05	0.0109362	106589751	LOC106589751	1-acyl-sn-glycerol-3-phosphate acyltransferase delta-like
gene63241:106592435	51.2075	-2.14289	0.546603	8.84085e-05	0.0109362	106592435	LOC106592435	b(0,+)-type amino acid transporter 1-like
gene6481:100194750	219.984	1.47419	0.375586	8.67178e-05	0.0109362	100194750	cdc20	cell division cycle 20
gene25694:106564892	409.663	5.72488	1.46268	9.07965e-05	0.0110366	106564892	LOC106564892	uncharacterized LOC106564892
gene49842:106588407	309.959	1.05061	0.268394	9.06114e-05	0.0110366	106588407	LOC106588407	carboxy-terminal kinesin 2-like
gene47007:106585781	44.5485	-2.02474	0.517797	9.21865e-05	0.0111468	106585781	slc2a6	solute carrier family 2 member 6
gene14343:106607556	128.039	1.08721	0.278383	9.40519e-05	0.0113132	106607556	LOC106607556	prolyl endopeptidase-like
gene2424:106565855	189.039	1.38051	0.354431	9.81972e-05	0.0116918	106565855	LOC106565855	C-C motif chemokine 19-like
gene34369:106573204	91.7467	1.14602	0.29423	9.82118e-05	0.0116918	106573204	LOC106573204	transcription factor E2F4-like
gene26448:106565539	7877	0.805062	0.207005	0.000100615	0.0118556	106565539	LOC106565539	uncharacterized LOC106565539
gene38704:106577590	524.545	1.37862	0.354373	0.000100115	0.0118556	106577590	LOC106577590	histone H2A.Z
gene42708:106581557	144.95	-1.25125	0.321907	0.000101487	0.0118977	106581557	LOC106581557	fibronectin type-III domain-containing protein 3A-like
gene34395:106573181	1029.13	-1.15451	0.29733	0.000103201	0.011977	106573181	LOC106573181	solute carrier family 23 member 1-like
gene46399:106585071	1182.72	1.06125	0.273293	0.000103103	0.011977	106585071	LOC106585071	proliferating cell nuclear antigen
gene14438:106607664	319.168	1.64324	0.423573	0.000104682	0.0120881	106607664	rrm2	ribonucleotide reductase regulatory subunit M2
gene27703:100136527	2273.62	-1.05022	0.271269	0.000108167	0.0123602	100136527	slc6a6	solute carrier family 6 (neurotransmitter transporter, taurine), member 6
gene35687:106574598	117.74	-0.981934	0.253702	0.000108644	0.0123602	106574598	LOC106574598	neurobeachin-like protein 1
gene51795:100196625	1753.87	0.67744	0.174941	0.000107776	0.0123602	100196625	psme2	proteasome activator subunit 2
gene15858:106608962	57.5582	1.34835	0.349053	0.000112052	0.0124693	106608962	LOC106608962	PC-esterase domain-containing protein 1A-like
gene16445:106609559	212.991	-1.23066	0.31863	0.000112302	0.0124693	106609559	LOC106609559	uncharacterized LOC106609559
gene18271:106611323	184.363	-0.838678	0.217051	0.000111557	0.0124693	106611323	LOC106611323	nesprin-1-like
gene22155:100196159	59.3682	1.5521	0.401399	0.000110309	0.0124693	100196159	paf	PCNA-associated factor
gene50261:106588685	249.969	1.31166	0.33959	0.000112243	0.0124693	106588685	rpa3	replication protein A3
gene17125:106610219	333.746	1.12716	0.292263	0.00011494	0.0125808	106610219	LOC106610219	ATP-binding cassette sub-family E member 1
gene31347:106570230	278.529	1.13253	0.293624	0.000114758	0.0125808	106570230	LOC106570230	nuclear transport factor 2-like
gene46578:100196511	155.333	1.54399	0.400289	0.000114692	0.0125808	100196511	sld5	DNA replication complex GINS protein SLD5
gene77181:100286435	432.6	0.848896	0.220434	0.000117624	0.0128138	100286435	zc3hf	Zinc finger CCCH domain-containing protein 15
gene52410:106591524	152.75	-2.14378	0.557368	0.000119937	0.0130044	106591524	LOC106591524	zonadhesin-like
gene19877:106612827	711.08	1.24538	0.323978	0.000121038	0.0130572	106612827	LOC106612827	T-complex protein 1 subunit zeta
gene31982:106570836	27.7942	3.65792	0.951847	0.000121555	0.0130572	106570836	LOC106570836	cytosolic phospholipase A2-like
gene40072:106578964	99.8034	2.22282	0.578951	0.000123343	0.0131879	106578964	LOC106578964	interferon-induced protein with tetratricopeptide repeats 5-like
gene26632:106565864	720.684	0.828717	0.216196	0.000126501	0.0134179	106565864	LOC106565864	T-complex protein 11-like protein 2
gene33364:106572102	2235.39	-0.594452	0.155093	0.000126655	0.0134179	106572102	LOC106572102	laminin subunit beta-2-like
gene20012:106612993	445.83	-0.666195	0.174019	0.000129033	0.0134821	106612993	LOC106612993	beta-secretase 2-like
gene32968:106571794	99.7276	-1.0243	0.267571	0.000129116	0.0134821	106571794	LOC106571794	pleckstrin homology domain-containing family G member 1-like
gene46169:106584897	99.1768	-0.944357	0.246897	0.000130822	0.0134821	106584897	LOC106584897	calcium/calmodulin-dependent protein kinase type II subunit beta
gene49770:106588488	1705.15	0.73008	0.190856	0.000130615	0.0134821	106588488	LOC106588488	60S ribosomal protein L11
gene50437:106588856	198.137	-1.59521	0.416492	0.000128092	0.0134821	106588856	LOC106588856	non-syndromic hearing impairment protein 5-like
gene50991:106589474	313.286	1.12849	0.295113	0.000131348	0.0134821	106589474	LOC106589474	histone H3.3
gene6390:106599400	179.868	0.941683	0.246062	0.000129708	0.0134821	106599400	mrps14	mitochondrial ribosomal protein S14
gene2557:100286733	1231.18	1.07606	0.281859	0.000134679	0.0137145	100286733	habp4	Intracellular hyaluronan-binding protein 4
gene38554:106577453	161.941	-1.23459	0.323492	0.000135393	0.0137145	106577453	LOC106577453	uncharacterized LOC106577453
gene47871:106586634	57.6334	1.36084	0.356552	0.000135262	0.0137145	106586634	LOC106586634	chromatin assembly factor 1 subunit B-like
gene80778:106596063	49.439	1.80105	0.472765	0.000139184	0.0140369	106596063	LOC106596063	uncharacterized protein C11orf98 homolog
gene37398:106576293	94.2846	1.47032	0.386234	0.000140769	0.014135	106576293	LOC106576293	small nuclear ribonucleoprotein F-like
gene40808:106579692	953.747	0.852154	0.224183	0.000144019	0.0143988	106579692	LOC106579692	probable polyketide synthase 1
gene50565:106588994	3419.04	0.780171	0.20562	0.000148095	0.0147424	106588994	LOC106588994	60S acidic ribosomal protein P1-like
gene16892:106609973	75.5045	1.01417	0.267417	0.000149157	0.0147845	106609973	LOC106609973	mannosyl-oligosaccharide glucosidase-like
gene22508:106561666	181.369	1.10096	0.290554	0.000151147	0.0148693	106561666	LOC106561666	neuroepithelial cell-transforming gene 1 protein-like
gene33605:106572454	95.5409	-1.94745	0.513983	0.0001513	0.0148693	106572454	LOC106572454	uridine-cytidine kinase-like 1
gene12483:106605843	172.456	1.18064	0.311697	0.000152002	0.0148749	106605843	LOC106605843	cytochrome c oxidase subunit 6B1-like
gene42102:106580963	389.121	1.2994	0.343315	0.000153799	0.0149524	106580963	LOC106580963	structural maintenance of chromosomes protein 4-like
gene44864:100196021	866.922	0.995527	0.263062	0.000154089	0.0149524	100196021	rsmb	Small nuclear ribonucleoprotein-associated protein B
gene2951:100286640	108.963	1.44467	0.3821	0.000156281	0.0151017	100286640	pole3	DNA polymerase epsilon 3, accessory subunit
gene44213:106582960	363.49	1.11717	0.295726	0.000158262	0.0152294	106582960	LOC106582960	mRNA turnover protein 4 homolog
gene33767:106572599	189.597	1.01179	0.268045	0.0001602	0.0153207	106572599	LOC106572599	SAP domain-containing ribonucleoprotein-like
gene62178:106592913	311.483	-0.999164	0.264809	0.000161201	0.0153207	106592913	LOC106592913	RNA-binding protein 47-like
gene81543:106596922	61.2201	3.14433	0.833284	0.000161024	0.0153207	106596922	LOC106596922	protein PML-like
gene13008:106606356	35.9031	-4.17742	1.10766	0.000162329	0.0153647	106606356	LOC106606356	nucleoside diphosphate-linked moiety X motif 19, mitochondrial-like
gene52991:106591425	42.8776	1.45003	0.384736	0.000163966	0.0154563	106591425	LOC106591425	serine hydroxymethyltransferase, cytosolic-like
gene51773:100195814	8224.58	0.781365	0.207566	0.000166943	0.015673	100195814	rps20	ribosomal protein S20
gene11269:106604637	147.426	1.08627	0.288883	0.000169743	0.0157779	106604637	exosc3	exosome component 3
gene17196:106610287	58.0649	2.18522	0.581373	0.000170781	0.0157779	106610287	LOC106610287	E3 ISG15--protein ligase HERC5-like
gene5747:100136478	183.205	2.80832	0.746818	0.000169655	0.0157779	100136478	LOC100136478	alpha amylase
gene8067:106601709	525.14	-0.697295	0.185515	0.000170793	0.0157779	106601709	LOC106601709	pyridoxal-dependent decarboxylase domain-containing protein 1-like
gene39021:106577901	13659	-1.49791	0.398903	0.000173289	0.0159447	106577901	LOC106577901	zonadhesin-like
gene29377:106568292	276.421	1.09616	0.292486	0.000178448	0.0162896	106568292	LOC106568292	density-regulated protein-like
gene9929:106603390	6596.7	-0.810743	0.216312	0.000178226	0.0162896	106603390	LOC106603390	DNA-directed RNA polymerase II subunit rpb1-like
gene4511:106586181	51.6115	1.25702	0.33592	0.000182548	0.0165715	106586181	LOC106586181	dispanin subfamily A member 2b-like
gene49755:100195587	178.517	1.38439	0.370017	0.000182972	0.0165715	100195587	borea	Borealin
gene31010:106570097	3539.91	0.644282	0.172307	0.000184637	0.016657	106570097	LOC106570097	40S ribosomal protein S27
gene2421:100196714	287.531	1.50241	0.402683	0.00019073	0.0169264	100196714	stml2	Stomatin-like protein 2
gene3194:106572931	68.5752	-1.29657	0.347666	0.000191964	0.0169264	106572931	LOC106572931	DEP domain-containing mTOR-interacting protein-like
gene4201:106582397	138.588	-1.96626	0.527247	0.000192021	0.0169264	106582397	LOC106582397	GRAM domain-containing protein 1A-like
gene49004:106587773	300.063	0.968217	0.259409	0.000189666	0.0169264	106587773	LOC106587773	transaldolase-like
gene50349:106588760	416.814	1.18144	0.316514	0.000189452	0.0169264	106588760	LOC106588760	small nuclear ribonucleoprotein Sm D1
gene71689:106592081	236.042	-2.45492	0.658251	0.00019189	0.0169264	106592081	LOC106592081	cytochrome P450 2F3-like
gene4335:106583523	115.964	-1.00944	0.270808	0.000193376	0.016981	106583523	LOC106583523	zinc finger protein 516-like
gene17064:106610160	81.9925	-1.58265	0.425129	0.00019707	0.0170832	106610160	atrn	attractin
gene17213:106610305	121.86	-1.03146	0.277015	0.000196491	0.0170832	106610305	LOC106610305	calcium uniporter protein, mitochondrial-like
gene32667:106571471	285.006	1.07214	0.287823	0.000195319	0.0170832	106571471	knl1	kinetochore scaffold 1
gene44340:106583223	73.461	1.40831	0.378355	0.000197498	0.0170832	106583223	fkbp11	FK506 binding protein 11
gene26487:106565678	122.81	1.0477	0.281674	0.000199568	0.0171339	106565678	espl1	extra spindle pole bodies like 1, separase
gene588:100195680	502.162	1.12237	0.301723	0.000199316	0.0171339	100195680	LOC100195680	transforming acidic coiled-coil-containing protein 3
gene3755:106578012	564.813	2.45645	0.660711	0.000200891	0.0171836	106578012	LOC106578012	urokinase plasminogen activator surface receptor-like
gene1485:106609534	267.367	1.10027	0.296115	0.000202656	0.0172706	106609534	LOC106609534	ribosomal L1 domain-containing protein 1-like
gene20234:100196843	1189.34	1.01947	0.274829	0.000207691	0.017363	100196843	folr1	Folate receptor alpha
gene24158:106563358	44.1814	2.10557	0.567665	0.00020793	0.017363	106563358	LOC106563358	C-C motif chemokine 19-like
gene25932:106565291	260.746	1.27853	0.344593	0.000207042	0.017363	106565291	LOC106565291	ubiquitin-conjugating enzyme E2 C-like
gene39352:106578252	51.2389	-1.50004	0.404192	0.000206278	0.017363	106578252	LOC106578252	rab11 family-interacting protein 3-like
gene44463:106583276	334.93	0.595424	0.160383	0.000205214	0.017363	106583276	LOC106583276	SAP domain-containing ribonucleoprotein-like
gene45530:100846962	892.488	0.79289	0.213787	0.000208251	0.017363	100846962	dad1	defender against cell death 1
gene40885:100195954	141.903	1.01642	0.274126	0.000209032	0.0173655	100195954	ccdc58	coiled-coil domain containing 58
gene20246:106613233	759.059	-1.27566	0.344294	0.000211256	0.0174873	106613233	LOC106613233	dipeptidyl peptidase 1-like
gene22524:106561682	423.785	0.943679	0.255323	0.000219005	0.0178039	106561682	LOC106561682	small nuclear ribonucleoprotein F-like
gene22793:106561948	222.736	0.928902	0.251468	0.000220828	0.0178039	106561948	LOC106561948	midkine-B-like
gene23679:106562833	48.8729	1.12741	0.30549	0.00022381	0.0178039	106562833	LOC106562833	outer dense fiber protein 2-like
gene24127:106563237	200.578	3.88169	1.05034	0.00021933	0.0178039	106563237	LOC106563237	bile salt-activated lipase-like
gene27169:100196609	126.431	1.39367	0.378141	0.000228186	0.0178039	100196609	stk6	Serine/threonine-protein kinase 6
gene30292:106569220	953.207	0.709438	0.192254	0.000224158	0.0178039	106569220	LOC106569220	protein transport protein Sec61 subunit gamma-like
gene31262:106569884	381.486	1.24104	0.336667	0.000227582	0.0178039	106569884	LOC106569884	interleukin enhancer-binding factor 2 homolog
gene3494:106575371	178.625	-0.857605	0.232654	0.000227649	0.0178039	106575371	LOC106575371	phosphatidylinositol 4-phosphate 5-kinase type-1 alpha-like
gene35546:106574401	264.012	0.812647	0.220411	0.000226946	0.0178039	106574401	LOC106574401	26S proteasome non-ATPase regulatory subunit 14
gene38073:100195770	216.987	1.03934	0.281806	0.000225905	0.0178039	100195770	chch1	Coiled-coil-helix-coiled-coil-helix domain-containing protein 1
gene38710:106577597	101.628	1.11804	0.303199	0.000226497	0.0178039	106577597	LOC106577597	tRNA methyltransferase 10 homolog A-like
gene41422:106580360	211.414	1.20771	0.327082	0.00022217	0.0178039	106580360	kntc1	kinetochore associated 1
gene43522:100136430	2018.96	1.54051	0.417754	0.000226384	0.0178039	100136430	LOC100136430	60 kDa heat shock protein, mitochondrial
gene50496:106588923	613.72	1.03956	0.281642	0.000223321	0.0178039	106588923	sem1	SEM1, 26S proteasome complex subunit
gene51640:106590096	100.328	1.32657	0.359898	0.000227848	0.0178039	106590096	ncapg2	non-SMC condensin II complex subunit G2
gene70696:106594852	49.0431	-1.70925	0.463556	0.000226683	0.0178039	106594852	LOC106594852	uncharacterized LOC106594852
gene71567:106591484	159.957	1.17369	0.318076	0.000224287	0.0178039	106591484	LOC106591484	uncharacterized LOC106591484
gene5678:106596289	1731.88	1.03371	0.280559	0.000229165	0.0178201	106596289	LOC106596289	40S ribosomal protein S8
gene13964:106607151	471.761	2.57821	0.701837	0.000239239	0.0180003	106607151	LOC106607151	interferon-induced very large GTPase 1-like
gene14625:106607811	86.8651	1.38752	0.377799	0.000240055	0.0180003	106607811	LOC106607811	lymphokine-activated killer T-cell-originated protein kinase homolog
gene15870:106608971	226.785	0.819767	0.222925	0.000235692	0.0180003	106608971	LOC106608971	H/ACA ribonucleoprotein complex subunit 3
gene27933:106566859	384.086	-0.718629	0.195637	0.000239457	0.0180003	106566859	LOC106566859	ephrin type-A receptor 2-like
gene39980:106578873	1716.65	1.12508	0.306144	0.000237847	0.0180003	106578873	LOC106578873	histone H3.3
gene41340:106579876	491.922	1.02224	0.277847	0.000234007	0.0180003	106579876	cenpe	centromere protein E
gene45283:106584040	80.7608	1.10873	0.301799	0.000239038	0.0180003	106584040	LOC106584040	tetratricopeptide repeat protein 4-like
gene65156:106593758	100.583	0.959461	0.261036	0.000237304	0.0180003	106593758	LOC106593758	THUMP domain-containing protein 1-like
gene75654:106590803	60.2654	1.65048	0.449397	0.000240049	0.0180003	106590803	tma16	translation machinery associated 16 homolog
gene7632:106601260	549.726	-1.13791	0.309329	0.000234489	0.0180003	106601260	LOC106601260	rho GTPase-activating protein 12-like
gene7695:106601313	45.8396	-2.78948	0.757931	0.000232876	0.0180003	106601313	LOC106601313	ral guanine nucleotide dissociation stimulator-like 1
gene10938:106604298	205.497	0.986525	0.268727	0.000241506	0.0180325	106604298	pin4	peptidylprolyl cis/trans isomerase, NIMA-interacting 4
gene44457:100380681	1473.65	0.985367	0.268454	0.000242047	0.0180325	100380681	LOC100380681	tubulin alpha-1C chain
gene74361:106593950	651.142	-0.899921	0.245296	0.000243778	0.0180896	106593950	rbm47	RNA binding motif protein 47
gene75497:106594319	949.69	0.767057	0.209117	0.000244379	0.0180896	106594319	LOC106594319	non-histone chromosomal protein HMG-14A pseudogene
gene10177:100196285	138.139	1.27522	0.347977	0.000247656	0.0182174	100196285	rfc2	replication factor C (activator 1) 2
gene41129:106580061	4943.2	-0.734108	0.200322	0.000247684	0.0182174	106580061	LOC106580061	guanine deaminase-like
gene26033:106565201	115.691	1.51763	0.414532	0.000251152	0.0183762	106565201	lyar	Ly1 antibody reactive
gene31332:106570193	948.895	-0.62633	0.171091	0.000251434	0.0183762	106570193	LOC106570193	rho guanine nucleotide exchange factor 2-like
gene37090:106575987	63.9808	-1.32073	0.361365	0.000257338	0.0187483	106575987	LOC106575987	copine-8
gene52146:106590610	1144.21	1.19225	0.326323	0.000258614	0.018782	106590610	LOC106590610	T-complex protein 1 subunit epsilon-like
gene47355:106586127	44.6826	-2.2135	0.606013	0.000259631	0.0187968	106586127	LOC106586127	villin-1-like
gene1198:106606339	201.925	1.43028	0.391752	0.000261239	0.0188541	106606339	LOC106606339	lymphocyte-specific helicase-like
gene30654:100306862	203.037	1.13013	0.309749	0.000263728	0.0189744	100306862	sf3a2	splicing factor 3a, subunit 2
gene32575:106571401	78.3742	-3.01718	0.827519	0.00026629	0.0190993	106571401	LOC106571401	E3 ubiquitin-protein ligase TRIM9-like
gene10867:106604229	344.04	0.732197	0.200911	0.000268028	0.0191644	106604229	LOC106604229	cytochrome b-c1 complex subunit 8-like
gene38203:100196122	311.717	1.04751	0.287572	0.000269906	0.0192391	100196122	cdc2	Cell division control protein 2 homolog
gene48724:106587484	51.1267	1.13518	0.311991	0.000274226	0.0194869	106587484	LOC106587484	kinesin-like protein KIF18A
gene32637:100195465	567.295	1.15731	0.31831	0.000277135	0.0196332	100195465	rpl7l1	ribosomal protein L7 like 1
gene11169:100195170	151.853	1.26627	0.348562	0.000280338	0.0196791	100195170	ccna2	cyclin A2
gene37639:106576546	181.942	0.85071	0.234171	0.000280295	0.0196791	106576546	LOC106576546	mitochondrial-processing peptidase subunit beta-like
gene8296:106601929	67.37	-1.66542	0.458321	0.00027933	0.0196791	106601929	LOC106601929	E3 ubiquitin-protein ligase RNF213-like
gene21876:106560874	63.7956	-1.21029	0.3334	0.000283249	0.0198109	106560874	LOC106560874	malonyl-CoA decarboxylase, mitochondrial-like
gene31983:100196879	323.405	0.987007	0.271938	0.000283932	0.0198109	100196879	dhfr	dihydrofolate reductase
gene30671:106569552	6501.64	0.829193	0.22871	0.00028838	0.0200607	106569552	LOC106569552	cold-inducible RNA-binding protein B-like
gene11140:106604444	652.504	0.604023	0.166676	0.000290159	0.0200727	106604444	LOC106604444	NADH dehydrogenase [ubiquinone] 1 alpha subcomplex subunit 1-like
gene44880:106583670	48.3831	-1.33002	0.367022	0.000290291	0.0200727	106583670	LOC106583670	nuclear factor of activated T-cells, cytoplasmic 2-like
gene24279:106563510	258.688	1.03022	0.284686	0.000295987	0.0202843	106563510	LOC106563510	chromosome-associated kinesin KIF4-like
gene28155:106567051	1887.54	0.728329	0.20126	0.000295912	0.0202843	106567051	LOC106567051	40S ribosomal protein S26-like
gene37070:106575999	28.6706	-1.74771	0.482865	0.000295214	0.0202843	106575999	LOC106575999	protein phosphatase 1H-like
gene10905:106604262	79.3806	-1.70426	0.47119	0.000298129	0.0203106	106604262	LOC106604262	actin filament-associated protein 1-like 1
gene25718:106564868	459.069	1.15459	0.319198	0.000297846	0.0203106	106564868	LOC106564868	importin subunit alpha-1-like
gene17529:106610591	338.962	-1.77136	0.489897	0.000299432	0.0203394	106610591	LOC106610591	transforming growth factor-beta receptor-associated protein 1-like
gene10868:106604228	298.152	1.31662	0.364387	0.000302383	0.0203601	106604228	LOC106604228	heat shock 70 kDa protein 4-like
gene24837:100194701	395.715	0.857262	0.23722	0.00030176	0.0203601	100194701	LOC100194701	uncharacterized LOC100194701
gene46776:100136483	2533.79	0.92634	0.256326	0.000301607	0.0203601	100136483	LOC100136483	tubulin beta-1 chain
gene35201:106574092	289.492	1.19868	0.332193	0.0003081	0.0205652	106574092	LOC106574092	E3 ubiquitin-protein ligase UHRF1-like
gene52043:106590505	101.791	1.10506	0.306219	0.000307693	0.0205652	106590505	cip2a	cell proliferation regulating inhibitor of protein phosphatase 2A
gene71272:106594162	47.0386	1.29921	0.359914	0.000306445	0.0205652	106594162	LOC106594162	structural maintenance of chromosomes protein 2-like
gene39151:106578043	742.998	-1.69449	0.470067	0.000312409	0.0207928	106578043	LOC106578043	H(+)/Cl(-) exchange transporter 5-like
gene33989:106572841	276.287	1.2576	0.34914	0.000315794	0.0209219	106572841	LOC106572841	small nuclear ribonucleoprotein G
gene4314:106583386	258.46	0.971709	0.269793	0.000316162	0.0209219	106583386	LOC106583386	cell division cycle-associated protein 3-like
gene17194:106610285	197.514	2.65681	0.738295	0.000319972	0.0210466	106610285	LOC106610285	probable E3 ubiquitin-protein ligase HERC3
gene46530:106585262	107.193	0.88236	0.245242	0.000320779	0.0210466	106585262	LOC106585262	U4/U6.U5 tri-snRNP-associated protein 2-like
gene52203:106590666	38.6634	-1.64421	0.456898	0.000319889	0.0210466	106590666	LOC106590666	somatomedin-B and thrombospondin type-1 domain-containing protein-like
gene23659:100196846	174.353	0.981919	0.273241	0.000326141	0.0213378	100196846	nip7	nuclear import 7 homolog (S. cerevisiae)
gene14995:106608168	264.724	1.04871	0.292007	0.000328921	0.0213984	106608168	LOC106608168	26S protease regulatory subunit 10B-like
gene19074:106612058	89.1548	-1.38851	0.386588	0.000328526	0.0213984	106612058	LOC106612058	LON peptidase N-terminal domain and RING finger protein 1-like
gene5721:100380292	344.667	-0.909814	0.253435	0.000330771	0.0214583	100380292	rab31	Ras-related protein Rab-31
gene104:100196112	92.7821	1.22238	0.340881	0.000335861	0.021632	100196112	cdkn3	cyclin dependent kinase inhibitor 3
gene2607:106566309	149.033	0.873653	0.243654	0.000336259	0.021632	106566309	noc4l	nucleolar complex associated 4 homolog
gene4363:106583887	243.332	-0.827286	0.230649	0.000334786	0.021632	106583887	LOC106583887	protein dopey-1-like
gene38178:106577053	371.494	-0.680792	0.189974	0.000338881	0.0217401	106577053	ccser2	coiled-coil serine rich protein 2
gene26651:100194889	258.21	2.36342	0.659942	0.00034195	0.0218159	100194889	mx	Interferon-induced GTP-binding protein Mx
gene43972:106582815	198.226	1.2543	0.350195	0.000341344	0.0218159	106582815	utp3	UTP3, small subunit processome component
gene40045:106578938	286.898	1.01538	0.283955	0.000349091	0.0222101	106578938	LOC106578938	cytochrome c oxidase subunit 7A-related protein, mitochondrial-like
gene24529:100196213	68.2005	1.50155	0.420035	0.000350465	0.0222362	100196213	ssa27	Sjoegren syndrome/scleroderma autoantigen 1 homolog
gene26473:106565519	149.23	1.15488	0.323185	0.000352336	0.0222667	106565519	LOC106565519	elongation factor Ts, mitochondrial
gene43704:106582534	175.682	-1.14404	0.320237	0.000353626	0.0222667	106582534	LOC106582534	fer-1-like protein 6
gene50365:106588796	167.29	1.08851	0.304708	0.000353837	0.0222667	106588796	LOC106588796	cell division cycle-associated 7-like protein
gene48285:106587056	251.966	0.904479	0.253398	0.000357805	0.0224172	106587056	LOC106587056	cytoskeleton-associated protein 5-like
gene50986:106589469	29.3079	1.55091	0.434535	0.00035817	0.0224172	106589469	LOC106589469	uncharacterized LOC106589469
gene14374:100196700	84.8743	-0.927996	0.260982	0.00037685	0.0231643	100196700	tagap	T-cell activation GTPase activating protein
gene14909:106608082	1052.47	1.11411	0.313148	0.000374014	0.0231643	106608082	LOC106608082	peptidyl-prolyl cis-trans isomerase FKBP3-like
gene28160:106567055	1349.2	1.08118	0.304139	0.000378131	0.0231643	106567055	LOC106567055	proliferation-associated protein 2G4-like
gene37837:106576850	409.411	1.09315	0.307504	0.00037811	0.0231643	106576850	rrp12	ribosomal RNA processing 12 homolog
gene38748:106577627	5995.09	-1.26424	0.355548	0.000376906	0.0231643	106577627	LOC106577627	ATP-binding cassette sub-family A member 1-like
gene42072:106580924	123.654	-0.890474	0.250449	0.000377249	0.0231643	106580924	sorl1	sortilin related receptor 1
gene69789:106591776	132.537	2.43637	0.684471	0.000371575	0.0231643	106591776	LOC106591776	endonuclease domain-containing 1 protein-like
gene9230:106602803	39.0788	2.68317	0.754521	0.000376378	0.0231643	106602803	LOC106602803	perilipin-2-like
gene47816:106586596	48.5747	-1.10833	0.311944	0.000380882	0.0232711	106586596	LOC106586596	serine/threonine-protein kinase LATS2-like
gene65989:100286631	82.1248	1.46409	0.412933	0.000391727	0.0238705	100286631	ube2t	ubiquitin conjugating enzyme E2 T
gene21833:106560912	264.539	0.956325	0.269866	0.000394549	0.0239793	106560912	LOC106560912	actin-binding protein anillin-like
gene20628:106613619	291.916	0.937211	0.264614	0.000397389	0.0240776	106613619	LOC106613619	WD repeat-containing protein 18
gene2505:106567141	200.859	1.13753	0.321287	0.000399294	0.0240776	106567141	LOC106567141	HAUS augmin-like complex subunit 4
gene28341:106567205	200.417	-0.780413	0.220418	0.000399224	0.0240776	106567205	LOC106567205	lysine-specific demethylase 5B-B-like
gene15841:106608949	24990	-1.91063	0.539758	0.000400447	0.0240842	106608949	LOC106608949	zonadhesin-like
gene13031:106606382	27.1787	1.3265	0.375001	0.000404181	0.0240874	106606382	LOC106606382	DNA polymerase delta catalytic subunit-like
gene18030:100194533	336.903	0.769727	0.217771	0.000408437	0.0240874	100194533	eif4e1a	eukaryotic translation initiation factor 4e 1a
gene2282:106563677	2000.61	0.620222	0.175369	0.000405197	0.0240874	106563677	LOC106563677	60S ribosomal protein L17-like
gene23845:106562989	225.135	1.18604	0.335503	0.00040761	0.0240874	106562989	LOC106562989	tubulin alpha chain, testis-specific-like
gene37926:106576770	234.128	-0.788414	0.223026	0.000407647	0.0240874	106576770	LOC106576770	placenta-specific protein 9-like
gene38391:106577292	30.7344	1.55081	0.438787	0.000408845	0.0240874	106577292	LOC106577292	protein FAM161B-like
gene43495:106582337	228.115	-0.759592	0.214778	0.000405246	0.0240874	106582337	LOC106582337	integrin beta-5-like
gene48163:106586922	63.9418	-0.987068	0.278965	0.000402684	0.0240874	106586922	LOC106586922	dnaJ homolog subfamily B member 6-like
gene47589:106586344	176.726	-2.17273	0.614918	0.000410319	0.0241127	106586344	LOC106586344	DNA-binding protein SATB2-like
gene37361:106576261	312.531	1.42062	0.402243	0.000412814	0.0241978	106576261	LOC106576261	ubl carboxyl-terminal hydrolase 18-like
gene15710:100195582	562.881	1.56656	0.444012	0.000418394	0.0242176	100195582	srk2	Tyrosine-protein kinase SRK2
gene27816:106566721	1092.67	1.21568	0.344379	0.00041546	0.0242176	106566721	LOC106566721	prostaglandin E synthase 3-like
gene34141:106572990	934.167	0.832934	0.236065	0.000418071	0.0242176	106572990	LOC106572990	60S ribosomal protein L10-like
gene48098:106586857	187.169	1.04078	0.294893	0.000416582	0.0242176	106586857	LOC106586857	interleukin-10 receptor subunit beta-like
gene6498:106599664	200.046	-0.884648	0.250708	0.000417779	0.0242176	106599664	LOC106599664	laminin subunit alpha-3-like
gene28601:106567501	406.085	-1.04288	0.295675	0.000420119	0.0242566	106567501	LOC106567501	protein Shroom1-like
gene49759:106588468	127.739	1.35729	0.384958	0.000422183	0.024315	106588468	LOC106588468	claspin-like
gene11117:106604461	169.867	-2.39406	0.679192	0.000423698	0.0243278	106604461	LOC106604461	multidrug resistance-associated protein 5-like
gene12389:106605740	331.103	-0.993314	0.281843	0.000424513	0.0243278	106605740	LOC106605740	pyruvate kinase PKM-like
gene48415:106587299	162.002	1.18182	0.335487	0.000427157	0.0244188	106587299	LOC106587299	SHC SH2 domain-binding protein 1-like
gene11434:106604775	287.689	0.911531	0.258815	0.000428401	0.0244294	106604775	LOC106604775	mitochondrial import receptor subunit TOM5 homolog
gene44815:106583633	576.379	-0.70341	0.199808	0.000430846	0.024475	106583633	LOC106583633	myotubularin-related protein 14-like
gene72410:106592946	158.318	-4.91655	1.39669	0.00043132	0.024475	106592946	LOC106592946	beta-2-microglobulin-like
gene33034:106571865	87.7571	-1.76469	0.501847	0.000437459	0.0247625	106571865	LOC106571865	membrane-associated guanylate kinase, WW and PDZ domain-containing protein 1-like
gene31741:106570600	56.7927	-1.21536	0.345747	0.000439489	0.0248166	106570600	LOC106570600	biotinidase-like
gene10260:106603708	1987.37	0.633473	0.180339	0.000443619	0.0249764	106603708	LOC106603708	40S ribosomal protein S3
gene11683:106605043	651.048	-0.83301	0.237286	0.000447144	0.0249764	106605043	LOC106605043	protein dopey-1-like
gene1867:106613610	102.033	0.828775	0.23607	0.000446909	0.0249764	106613610	tarbp1	TAR (HIV-1) RNA binding protein 1
gene29996:106568942	40.1647	-1.25753	0.358247	0.000447726	0.0249764	106568942	LOC106568942	ceramide synthase 2-like
gene36324:106575246	62.3202	6.45666	1.83909	0.000446786	0.0249764	106575246	LOC106575246	interferon-induced protein 44-like
gene20019:106612990	1068.66	0.972125	0.277045	0.000449959	0.0249818	106612990	LOC106612990	high mobility group nucleosome-binding domain-containing protein 3-like
gene44051:106582878	303.419	1.04969	0.299151	0.000449985	0.0249818	106582878	LOC106582878	host cell factor 1-like
gene2968:106570938	617.996	0.815242	0.232453	0.000452963	0.0250868	106570938	psmb7	proteasome subunit beta 7
gene31942:106570803	2973.24	-1.30358	0.371778	0.000454314	0.0251014	106570803	LOC106570803	sushi domain-containing protein 2-like
gene18538:106611545	195.938	1.39232	0.397185	0.000455786	0.0251226	106611545	LOC106611545	cyclin-A2-like
gene9938:100195484	474.97	1.07909	0.308097	0.000461038	0.0253516	100195484	rir1	Ribonucleoside-diphosphate reductase large subunit
gene14043:106607356	45.5825	-1.23898	0.35421	0.000469004	0.0256222	106607356	baiap3	BAI1 associated protein 3
gene14315:106607426	56.1967	-1.40219	0.401033	0.000471506	0.0256222	106607426	LOC106607426	GEM-interacting protein-like
gene16692:106609773	170.488	0.889069	0.254221	0.000470125	0.0256222	106609773	pmpcb	peptidase, mitochondrial processing beta subunit
gene19461:106612447	1587.91	0.902756	0.25815	0.00047049	0.0256222	106612447	LOC106612447	RNA-binding protein FUS-like
gene36146:100196670	369.943	1.14087	0.326153	0.000468816	0.0256222	100196670	atp5g3	ATP synthase, H+ transporting, mitochondrial Fo complex subunit C3 (subunit 9)
gene11086:100380635	461.359	1.12407	0.321674	0.000475086	0.0257561	100380635	mcm7	minichromosome maintenance complex component 7
gene32484:106571313	200.557	1.17566	0.336768	0.000481229	0.0260281	106571313	LOC106571313	ribosome production factor 2 homolog
gene41524:100196530	84.4252	1.40378	0.402243	0.000483213	0.0260743	100196530	dimt1	DIM1 dimethyladenosine transferase 1 homolog
gene49616:100196409	85.8203	1.15014	0.329656	0.000484999	0.0261097	100196409	cks1	Cyclin-dependent kinases regulatory subunit 1
gene21165:106560346	700.759	0.875131	0.251002	0.000489295	0.026158	106560346	LOC106560346	proteasome subunit alpha type-7-like
gene21906:100195319	183.27	0.992213	0.28457	0.000489002	0.026158	100195319	nup93	nucleoporin 93
gene3083:106572051	241.778	-1.00653	0.288658	0.000488598	0.026158	106572051	LOC106572051	protein Shroom3-like
gene12518:106605867	1737.42	-1.30691	0.375481	0.000500238	0.02634	106605867	LOC106605867	uncharacterized LOC106605867
gene32267:106571147	72.4435	1.32898	0.38154	0.000495445	0.02634	106571147	LOC106571147	N-myc proto-oncogene protein-like
gene43473:100195671	301.287	1.19835	0.344255	0.000499529	0.02634	100195671	mk67i	MKI67 FHA domain-interacting nucleolar phosphoprotein-like
gene44196:106582975	1082.31	0.623324	0.179096	0.000500683	0.02634	106582975	LOC106582975	60S ribosomal protein L22-like
gene447:106582108	46.9107	1.35251	0.3885	0.00049884	0.02634	106582108	LOC106582108	mitotic checkpoint serine/threonine-protein kinase BUB1 beta-like
gene46708:106585491	41.3825	2.65328	0.761897	0.000496822	0.02634	106585491	LOC106585491	phospholipase A2, minor isoenzyme-like
gene73828:106593804	100.145	-1.23263	0.354077	0.000499057	0.02634	106593804	LOC106593804	guanylyl cyclase-activating protein 2-like
gene10702:100196608	1573.81	0.856166	0.2462	0.00050608	0.0264619	100196608	ssp2	Sporozoite surface protein 2
gene13958:100195050	1108.48	-0.810759	0.233156	0.000506437	0.0264619	100195050	plbl1	phospholipase B-like 1
gene42345:106581107	139.443	1.27472	0.366567	0.000506222	0.0264619	106581107	LOC106581107	small nuclear ribonucleoprotein Sm D2
gene215:106560480	84.456	1.29153	0.371755	0.000512499	0.0266662	106560480	wars	tryptophanyl-tRNA synthetase
gene34975:106573846	69.3905	0.926261	0.266623	0.000512655	0.0266662	106573846	LOC106573846	tubulin alpha-1A chain-like
gene26489:106565677	409.951	1.22255	0.352187	0.000517938	0.0267101	106565677	LOC106565677	methylosome protein 50-like
gene32602:106571422	85.968	1.19706	0.344728	0.00051567	0.0267101	106571422	nsl1	NSL1, MIS12 kinetochore complex component
gene46633:106585576	162.477	1.08019	0.311185	0.000518125	0.0267101	106585576	LOC106585576	centromere-associated protein E-like
gene49874:106588385	92.2461	1.1068	0.318824	0.000517519	0.0267101	106588385	LOC106588385	histone H3-like centromeric protein A
gene42177:106581033	969.028	-1.44188	0.415609	0.000521786	0.0268389	106581033	LOC106581033	solute carrier family 13 member 2-like
gene14103:106607307	95.3927	1.20885	0.348853	0.000529809	0.0268982	106607307	LOC106607307	coiled-coil domain-containing protein 43-like
gene2522:106566936	991.582	-0.637283	0.183912	0.000529928	0.0268982	106566936	LOC106566936	T-box transcription factor TBX3-like
gene31917:106570779	74.5881	-1.1468	0.330685	0.000524425	0.0268982	106570779	LOC106570779	tribbles homolog 1-like
gene35714:106574637	162.827	0.918889	0.265177	0.00052985	0.0268982	106574637	LOC106574637	eukaryotic translation initiation factor 5B-like
gene44787:100196701	326.757	0.788658	0.227501	0.000527056	0.0268982	100196701	tgm2	transglutaminase 2, C polypeptide
gene67200:106596152	235.055	-1.76968	0.510526	0.000527485	0.0268982	106596152	LOC106596152	b(0,+)-type amino acid transporter 1-like
gene48690:100195990	62.1674	1.34535	0.388379	0.000532186	0.0269075	100195990	cenpn	centromere protein N
gene9422:106602874	1031.01	0.966592	0.279049	0.000532441	0.0269075	106602874	LOC106602874	histone H2AX
gene37349:106576254	296.873	3.72148	1.07506	0.000536854	0.0270713	106576254	LOC106576254	hemagglutinin/amebocyte aggregation factor-like
gene2536:106566762	188.623	-1.06503	0.30787	0.000541463	0.0272442	106566762	traf2	TNF receptor associated factor 2
gene45982:106584704	120.084	0.961195	0.277916	0.000543038	0.0272641	106584704	LOC106584704	cysteine-rich motor neuron 1 protein-like
gene28554:100195763	271.916	1.02937	0.297823	0.000547632	0.027435	100195763	nola2	H/ACA ribonucleoprotein complex subunit 2-like protein
gene30019:106568922	37.1581	1.20025	0.347444	0.000551261	0.0275571	106568922	lrrcc1	leucine rich repeat and coiled-coil centrosomal protein 1
gene11418:106604761	216.855	-0.996459	0.28867	0.000556661	0.0277071	106604761	LOC106604761	mid1-interacting protein 1-like
gene40651:106579526	58.6888	1.37555	0.398433	0.000555617	0.0277071	106579526	LOC106579526	myb-related protein A-like
gene16287:106609453	63.589	1.19294	0.346024	0.000565659	0.0280944	106609453	LOC106609453	RAD51-associated protein 1-like
gene42768:106581612	27.1261	-1.85727	0.538889	0.000567943	0.0281344	106581612	LOC106581612	uncharacterized LOC106581612
gene50328:106588762	59.3216	0.924899	0.268396	0.000568901	0.0281344	106588762	LOC106588762	U5 small nuclear ribonucleoprotein 40 kDa protein-like
gene7174:106600913	98.8764	-0.874358	0.253774	0.00057018	0.0281374	106600913	LOC106600913	GEM-interacting protein-like
gene42202:106581054	1173.85	1.07922	0.313331	0.000572415	0.0281378	106581054	LOC106581054	T-complex protein 1 subunit zeta-like
gene46741:106585463	407.319	0.655975	0.190455	0.000572625	0.0281378	106585463	LOC106585463	small nuclear ribonucleoprotein Sm D3-like
gene39090:106577966	148.026	1.95671	0.568464	0.000577235	0.0283041	106577966	LOC106577966	nuclear factor 7, brain-like
gene32015:106570866	759.992	0.900359	0.261625	0.00057869	0.0283154	106570866	LOC106570866	ubiquitin-conjugating enzyme E2 L3-like
gene35265:106574180	357.765	-0.904518	0.263035	0.000584365	0.0285326	106574180	rubcn	RUN and cysteine rich domain containing beclin 1 interacting protein
gene28947:106567942	266.829	0.849624	0.247168	0.000587265	0.0286137	106567942	LOC106567942	cytoskeleton-associated protein 2-like
gene22437:100195850	299.7	3.62177	1.05431	0.000592088	0.028788	100195850	cbpa2	Carboxypeptidase A2
gene24531:100380650	293.979	-0.938805	0.27337	0.000594326	0.028836	100380650	LOC100380650	EH domain-binding protein 1-like protein 1
gene829:106602205	809.314	0.880736	0.256529	0.000596319	0.0288721	106602205	psma3	proteasome subunit alpha 3
gene81331:100380294	57.5414	1.01183	0.294816	0.000599007	0.0289416	100380294	cnd3	Condensin complex subunit 3
gene47444:106586213	603.506	0.999028	0.291165	0.000601044	0.0289794	106586213	LOC106586213	lupus La protein homolog B-like
gene29559:100196371	315.545	1.16441	0.33953	0.000604763	0.0290492	100196371	brix1	BRX1, biogenesis of ribosomes
gene44343:106583218	13288.2	0.748702	0.218321	0.000605009	0.0290492	106583218	LOC106583218	uncharacterized LOC106583218
gene10835:106604193	226.181	1.80334	0.526234	0.000610573	0.0290746	106604193	LOC106604193	ras GTPase-activating protein-binding protein 1-like
gene12992:106606343	139.699	0.86729	0.253077	0.000610316	0.0290746	106606343	LOC106606343	NACHT, LRR and PYD domains-containing protein 3-like
gene14770:100196239	2235.73	1.05631	0.308175	0.000608875	0.0290746	100196239	tcp1	t-complex 1
gene53920:106592455	251.221	1.41446	0.412583	0.000607364	0.0290746	106592455	plk1	polo like kinase 1
gene17972:106610985	140.632	1.03705	0.302752	0.000613882	0.0291121	106610985	kif15	kinesin family member 15
gene44351:106583211	83.5574	-1.18153	0.344877	0.000612674	0.0291121	106583211	LOC106583211	scm-like with four MBT domains protein 1
gene43971:100195917	148.612	0.934348	0.272852	0.000616199	0.0291621	100195917	ppcs	phosphopantothenoylcysteine synthetase
gene18576:100195979	372.796	0.993348	0.290353	0.000623528	0.02927	100195979	gar1	GAR1 ribonucleoprotein
gene2947:106570339	152.781	0.828079	0.242046	0.000623549	0.02927	106570339	tubb4b	tubulin beta 4B class IVb
gene33819:106572680	2640.51	0.967171	0.282629	0.000621509	0.02927	106572680	LOC106572680	uncharacterized LOC106572680
gene43523:100194586	722.239	1.13061	0.330377	0.00062121	0.02927	100194586	hsp10	heat shock protein 10
gene15951:106609043	86.5947	1.13355	0.331492	0.000627247	0.0293361	106609043	LOC106609043	DEP domain-containing protein 7-like
gene24337:106563457	385.047	1.16421	0.340523	0.000628766	0.0293361	106563457	LOC106563457	stress-induced-phosphoprotein 1-like
gene7611:100194851	182.262	1.05528	0.308658	0.000628665	0.0293361	100194851	rgp1	RGP1 retrograde golgi transport homolog (S. cerevisiae)
gene20535:106613533	399.488	1.71667	0.502263	0.000631123	0.0293867	106613533	LOC106613533	galectin-3-binding protein A-like
gene33322:100380331	404.94	0.950914	0.27838	0.000635736	0.0295419	100380331	noc2l	NOC2 like nucleolar associated transcriptional repressor
gene2547:106566708	175.974	1.37136	0.401856	0.000643528	0.0296652	106566708	LOC106566708	G2/mitotic-specific cyclin-B1-like
gene26580:106565911	88.7139	1.53009	0.448349	0.000643196	0.0296652	106565911	LOC106565911	mRNA turnover protein 4 homolog
gene49244:106588017	439.446	3.67644	1.077	0.000641147	0.0296652	106588017	LOC106588017	galactose-specific lectin nattectin-like
gene9757:106603211	1813.21	1.09059	0.319449	0.000640247	0.0296652	106603211	LOC106603211	nucleophosmin-like
gene19070:106612053	163.476	1.18781	0.34837	0.000650564	0.029752	106612053	hmmr	hyaluronan mediated motility receptor
gene28515:106567406	544.534	1.13369	0.332479	0.000650053	0.029752	106567406	LOC106567406	complement component 1 Q subcomponent-binding protein, mitochondrial-like
gene33291:106572326	787.633	3.69403	1.08324	0.000649205	0.029752	106572326	LOC106572326	chymotrypsin-like elastase family member 2A
gene4814:106588670	37.5997	-2.61471	0.7666	0.000647757	0.029752	106588670	LOC106588670	metal transporter CNNM2-like
gene24378:106563424	810.818	0.665137	0.195159	0.000653983	0.0298493	106563424	psmb6	proteasome subunit beta 6
gene18711:106611772	524.698	0.843295	0.247514	0.000656661	0.0299124	106611772	LOC106611772	histidine--tRNA ligase, cytoplasmic-like
gene23593:106562751	97.1266	-1.07678	0.316119	0.000658608	0.029942	106562751	LOC106562751	golgin subfamily B member 1-like
gene11204:106604513	442.523	1.01756	0.299329	0.000675178	0.0304556	106604513	LOC106604513	H/ACA ribonucleoprotein complex subunit 1-like
gene22410:106561558	55.1572	2.92207	0.859308	0.000672646	0.0304556	106561558	LOC106561558	carboxypeptidase A1-like
gene25327:106564474	59.1365	1.1428	0.336148	0.000674634	0.0304556	106564474	LOC106564474	ribonuclease H2 subunit A-like
gene29312:106568161	3894.78	0.643504	0.189289	0.000674877	0.0304556	106568161	LOC106568161	60S ribosomal protein L17
gene10105:106603475	619.017	0.730262	0.215143	0.00068803	0.030577	106603475	LOC106603475	cytochrome c oxidase subunit 7B2, mitochondrial-like
gene16205:106609281	95.4836	1.02985	0.303287	0.000684729	0.030577	106609281	mcm10	minichromosome maintenance 10 replication initiation factor
gene3122:106572396	32.0479	-1.41045	0.41517	0.000680591	0.030577	106572396	hook3	hook microtubule tethering protein 3
gene41033:106580138	239.795	-0.638523	0.188064	0.000685685	0.030577	106580138	LOC106580138	ras GTPase-activating protein 1-like
gene4566:100195132	399.773	1.1426	0.336479	0.000684434	0.030577	100195132	ima2	Importin subunit alpha-2
gene78438:106591948	31.3015	-1.44135	0.424659	0.000688463	0.030577	106591948	LOC106591948	constitutive coactivator of PPAR-gamma-like protein 2
gene8383:106602018	124.113	2.23984	0.659448	0.000682436	0.030577	106602018	LOC106602018	uncharacterized LOC106602018
gene9599:106603064	444.011	0.917772	0.270333	0.000686365	0.030577	106603064	LOC106603064	pyruvate dehydrogenase E1 component subunit alpha, mitochondrial-like
gene10304:100195316	318.682	0.965737	0.2851	0.00070567	0.0309129	100195316	rcc1l	RCC1 like
gene13219:106606582	56.4059	1.16595	0.344213	0.000705887	0.0309129	106606582	LOC106606582	28S ribosomal protein S7, mitochondrial-like
gene25546:106564653	151.354	0.956743	0.282386	0.000703876	0.0309129	106564653	LOC106564653	U3 small nucleolar RNA-associated protein 6 homolog
gene26799:106565712	1491.92	1.01734	0.300367	0.000706634	0.0309129	106565712	LOC106565712	prothymosin alpha-like
gene33318:106572143	74.2932	-0.850335	0.250807	0.000697909	0.0309129	106572143	LOC106572143	PR domain zinc finger protein 2-like
gene36376:100196866	343.646	0.782799	0.231122	0.000706733	0.0309129	100196866	psde	26S proteasome non-ATPase regulatory subunit 14
gene51593:106590036	658.649	0.90684	0.267591	0.000701735	0.0309129	106590036	LOC106590036	zinc finger CCCH domain-containing protein 15-like
gene7735:106601305	39.5192	1.49238	0.44049	0.000704031	0.0309129	106601305	LOC106601305	DNA replication licensing factor mcm5-like
gene1790:106612247	107.675	0.997526	0.294627	0.000709888	0.0309337	106612247	LOC106612247	leucine-rich repeat-containing protein 59-like
gene31101:106570028	2241.6	0.848643	0.250636	0.000709298	0.0309337	106570028	LOC106570028	60S ribosomal protein L11
gene11060:106604416	121.657	-1.58593	0.468535	0.000712102	0.0309645	106604416	LOC106604416	HRAS-like suppressor 3
gene20390:100196002	930.892	0.878354	0.259528	0.000713277	0.0309645	100196002	psmd8	proteasome 26S subunit, non-ATPase 8
gene39799:101448051	534.602	-1.5777	0.466263	0.000715105	0.0309856	101448051	LOC101448051	uncharacterized LOC101448051
gene50616:106589046	800.997	1.72941	0.511227	0.000717342	0.0310244	106589046	LOC106589046	uncharacterized protein C6orf47-like
gene30574:106569474	445.625	1.05572	0.312205	0.000720946	0.0311219	106569474	LOC106569474	zygotic DNA replication licensing factor mcm6-B-like
gene10466:106603915	805.212	-0.881664	0.26086	0.000725283	0.0311346	106603915	LOC106603915	solute carrier family 23 member 1-like
gene19933:106612789	866.251	0.81141	0.240019	0.000723257	0.0311346	106612789	LOC106612789	serine/arginine-rich splicing factor 1B-like
gene36079:106575010	78.7229	-1.01777	0.301118	0.000724937	0.0311346	106575010	LOC106575010	charged multivesicular body protein 2b-like
gene12355:106605701	82.9877	1.02015	0.301996	0.000730112	0.0311681	106605701	LOC106605701	39S ribosomal protein L17, mitochondrial-like
gene56179:106593843	73.5873	2.67815	0.79281	0.000730006	0.0311681	106593843	LOC106593843	probable E3 ubiquitin-protein ligase HERC6
gene60030:106595418	11718.1	-1.039	0.30749	0.000727565	0.0311681	106595418	LOC106595418	intestinal mucin-like protein
gene28824:106567676	207.863	0.873121	0.258559	0.000733143	0.0312398	106567676	LOC106567676	nuclear pore complex protein Nup88-like
gene10264:106603710	76.5871	-1.11727	0.331226	0.00074319	0.0314021	106603710	LOC106603710	glycerophosphodiester phosphodiesterase domain-containing protein 5-like
gene17741:106610794	120.241	-1.10997	0.329081	0.000743753	0.0314021	106610794	LOC106610794	serine/threonine-protein kinase D3-like
gene49290:106588067	135.79	0.75029	0.222418	0.000742661	0.0314021	106588067	LOC106588067	RNA-binding protein NOB1-like
gene6204:106599039	439.464	-0.959107	0.284193	0.000738589	0.0314021	106599039	LOC106599039	solute carrier family 25 member 36-A-like
gene7046:100194598	940.179	1.1455	0.339486	0.00074028	0.0314021	100194598	prmt1	protein arginine methyltransferase 1
gene8783:106602347	47.1691	1.57774	0.467891	0.000746158	0.0314462	106602347	LOC106602347	SWI/SNF-related matrix-associated actin-dependent regulator of chromatin subfamily A member 5-like
gene1793:106612239	82.2564	0.914811	0.271512	0.000753546	0.0315213	106612239	LOC106612239	39S ribosomal protein L27, mitochondrial-like
gene18425:106611473	150.619	1.06065	0.314956	0.000758189	0.0315213	106611473	LOC106611473	nucleolar and spindle-associated protein 1-like
gene20394:106613382	553.167	-1.01027	0.29973	0.000750003	0.0315213	106613382	aplp2	amyloid beta precursor like protein 2
gene22105:106561330	35.6604	-1.2682	0.376668	0.000760225	0.0315213	106561330	LOC106561330	genetic suppressor element 1-like
gene28612:106567511	506.147	-0.998279	0.296498	0.00076017	0.0315213	106567511	LOC106567511	serine/threonine-protein kinase 10-like
gene29865:100195623	384.093	0.981459	0.291336	0.000754902	0.0315213	100195623	imp3	IMP3, U3 small nucleolar ribonucleoprotein
gene4778:106586974	3463.9	0.768808	0.228135	0.000751747	0.0315213	106586974	LOC106586974	40S ribosomal protein SA
gene47954:106586703	197.332	1.02095	0.303078	0.000755512	0.0315213	106586703	cmss1	cms1 ribosomal small subunit homolog (yeast)
gene53087:100194531	2752.47	0.576859	0.171284	0.000757549	0.0315213	100194531	rpl9	ribosomal protein L9
gene12956:106606306	199.979	-0.794521	0.236076	0.000763978	0.0315883	106606306	LOC106606306	nuclear distribution protein nudE-like 1-B
gene14161:106607257	250.129	0.936758	0.278398	0.000765943	0.0315883	106607257	LOC106607257	116 kDa U5 small nuclear ribonucleoprotein component
gene19688:106612521	115.306	-0.753357	0.223868	0.000764938	0.0315883	106612521	LOC106612521	zinc finger CCCH domain-containing protein 4-like
gene13904:106607208	264.347	1.17289	0.348988	0.000777092	0.0316296	106607208	LOC106607208	suppressor of SWI4 1 homolog
gene14021:106607371	167.149	-1.03584	0.308355	0.000781537	0.0316296	106607371	LOC106607371	hemoglobin subunit beta-1-like
gene16567:106609653	160.839	2.22952	0.663069	0.000772615	0.0316296	106609653	LOC106609653	poly [ADP-ribose] polymerase 11-like
gene19951:106612933	277.737	0.881446	0.262209	0.000774866	0.0316296	106612933	LOC106612933	replication protein A 70 kDa DNA-binding subunit-like
gene22442:106561604	165.798	1.41376	0.42033	0.000769747	0.0316296	106561604	LOC106561604	aurora kinase B-like
gene31089:106570037	92.2217	1.40643	0.418696	0.000782009	0.0316296	106570037	clspn	claspin
gene31522:106570382	684.238	0.666027	0.198117	0.000774404	0.0316296	106570382	LOC106570382	proteasome subunit alpha type-2
gene34911:106573564	175.015	1.16288	0.346063	0.000778555	0.0316296	106573564	LOC106573564	mitochondrial import inner membrane translocase subunit Tim13
gene3809:106578554	157.144	1.83935	0.547411	0.000779154	0.0316296	106578554	LOC106578554	V-set domain containing T-cell activation inhibitor 1-like
gene38599:106577498	191.384	0.952097	0.283281	0.000776701	0.0316296	106577498	zcchc4	zinc finger CCHC-type containing 4
gene48994:100194891	140.093	1.14363	0.340435	0.00078137	0.0316296	100194891	sycc	Cysteinyl-tRNA synthetase, cytoplasmic
gene32405:106571242	131.82	-0.817716	0.243474	0.000783553	0.0316366	106571242	LOC106571242	serine/threonine-protein kinase D3-like
gene50800:106589310	226.872	1.10618	0.329511	0.000787813	0.0317531	106589310	LOC106589310	proteasome activator complex subunit 3-like
gene10470:106603918	62.7374	0.940923	0.280513	0.000795686	0.0319079	106603918	LOC106603918	deoxycytidine kinase-like
gene12396:106605749	3183.89	0.617199	0.183965	0.000793699	0.0319079	106605749	rpl18	ribosomal protein L18
gene29690:106568615	141.918	-1.04993	0.313104	0.000798512	0.0319079	106568615	epha5	EPH receptor A5
gene36115:106575044	165.727	1.09566	0.326742	0.000798561	0.0319079	106575044	LOC106575044	nucleolar protein 58-like
gene48134:106586881	41.2467	-1.25477	0.374156	0.000797668	0.0319079	106586881	LOC106586881	transforming acidic coiled-coil-containing protein 1-like
gene8686:100194720	703.356	4.19488	1.25163	0.000803654	0.032056	100194720	LOC100194720	uncharacterized LOC100194720
gene29131:106567780	180.215	-0.936001	0.279317	0.000805088	0.0320578	106567780	LOC106567780	ephrin-B1-like
gene18211:100195154	150.266	1.23326	0.368086	0.000806755	0.0320688	100195154	if2a	Eukaryotic translation initiation factor 2 subunit 1
gene7292:106600827	66.1377	1.16489	0.347789	0.000809799	0.0321346	106600827	LOC106600827	uncharacterized LOC106600827
gene27236:100380341	195.152	1.06645	0.318513	0.000813304	0.0322183	100380341	mcm2	MCM2 minichromosome maintenance deficient 2, mitotin (S. cerevisiae)
gene13948:106607164	264.083	1.06152	0.317238	0.000819498	0.0322348	106607164	LOC106607164	ran GTPase-activating protein 1-like
gene2401:106564924	342.845	1.23816	0.369984	0.000818306	0.0322348	106564924	drg1	developmentally regulated GTP binding protein 1
gene31400:106570266	79.8601	1.69536	0.506691	0.000820029	0.0322348	106570266	ctps1	CTP synthase 1
gene46535:106585268	64.3483	1.77253	0.529626	0.000817613	0.0322348	106585268	LOC106585268	TRAF-type zinc finger domain-containing protein 1-like
gene48926:106587689	42.267	1.3673	0.408672	0.000820751	0.0322348	106587689	LOC106587689	protein regulator of cytokinesis 1-like
gene56867:106592004	80.7567	0.921477	0.275459	0.000822095	0.0322348	106592004	LOC106592004	UPF0390 protein zgc136864-like
gene24625:106563775	1709.45	-0.606216	0.181248	0.000823804	0.0322471	106563775	LOC106563775	claudin-3-like
gene11017:106604356	428.402	-0.777446	0.233067	0.000850787	0.0322783	106604356	LOC106604356	centromere protein F-like
gene11733:106605090	318.525	1.36735	0.410076	0.000854874	0.0322783	106605090	LOC106605090	cell division cycle-associated protein 3-like
gene12062:106605450	334.897	0.774538	0.232266	0.000853922	0.0322783	106605450	LOC106605450	ras GTPase-activating-like protein IQGAP3
gene12244:100195173	534.533	1.09257	0.326926	0.000831915	0.0322783	100195173	fbrl	rRNA 2-O-methyltransferase fibrillarin
gene13771:106606987	97.3161	-0.942605	0.282131	0.000834726	0.0322783	106606987	LOC106606987	cytoglobin-2-like
gene14217:106607492	1751.16	0.618544	0.185153	0.000835632	0.0322783	106607492	LOC106607492	ATP synthase F(0) complex subunit C3, mitochondrial-like
gene14536:106607749	92.0048	1.08697	0.325416	0.00083706	0.0322783	106607749	LOC106607749	nucleoporin Nup43-like
gene19033:106612016	60.762	0.949665	0.284122	0.000830414	0.0322783	106612016	LOC106612016	centromere protein U-like
gene2057:100196105	152.718	0.864078	0.2591	0.00085325	0.0322783	100196105	rcl1	RNA terminal phosphate cyclase like 1
gene20697:106613676	229.591	1.0721	0.321012	0.000838535	0.0322783	106613676	LOC106613676	nicotinamide riboside kinase 2-like
gene3041:106571656	85.3974	-1.20915	0.362466	0.000850237	0.0322783	106571656	LOC106571656	peptidyl-glycine alpha-amidating monooxygenase B-like
gene33560:100195085	207.411	0.692172	0.20761	0.000856058	0.0322783	100195085	dcj11	DnaJ homolog subfamily C member 11
gene33921:106572746	98.3256	-1.26817	0.379781	0.000840185	0.0322783	106572746	LOC106572746	uncharacterized LOC106572746
gene35619:106574521	492.312	0.796103	0.238581	0.000847434	0.0322783	106574521	LOC106574521	obg-like ATPase 1
gene3717:106577478	536.849	1.24975	0.374445	0.000845024	0.0322783	106577478	LOC106577478	mitochondrial import receptor subunit TOM40 homolog
gene41267:106579942	923.457	0.947244	0.2838	0.000844708	0.0322783	106579942	LOC106579942	cytochrome c oxidase subunit 6A, mitochondrial
gene41693:106580576	163.619	1.09296	0.327116	0.000834218	0.0322783	106580576	LOC106580576	U6 snRNA-associated Sm-like protein LSm1
gene42004:106580839	148.198	1.1228	0.336571	0.000849927	0.0322783	106580839	LOC106580839	glioma tumor suppressor candidate region gene 2 protein-like
gene44924:106583717	337.155	1.18266	0.35409	0.000837762	0.0322783	106583717	LOC106583717	translation machinery-associated protein 7-like
gene46709:106585490	85.5603	2.62795	0.788279	0.000856748	0.0322783	106585490	LOC106585490	phospholipase A2-like
gene51506:106589953	173.622	0.982469	0.294489	0.000849371	0.0322783	106589953	LOC106589953	nucleolar and coiled-body phosphoprotein 1-like
gene58352:106591251	30.8656	-1.22739	0.367243	0.000831246	0.0322783	106591251	LOC106591251	uncharacterized LOC106591251
gene7354:106600990	290.922	0.878581	0.263211	0.000844021	0.0322783	106600990	LOC106600990	116 kDa U5 small nuclear ribonucleoprotein component
gene43004:106581758	87.7499	1.38331	0.415033	0.000859137	0.0323156	106581758	LOC106581758	cell division cycle-associated protein 7-like
gene33349:106572118	641.702	0.637948	0.191495	0.000864093	0.0324491	106572118	LOC106572118	NSFL1 cofactor p47-like
gene34843:106573631	208.202	-1.08633	0.326246	0.000869153	0.0325862	106573631	LOC106573631	zinc finger CCHC domain-containing protein 14-like
gene11397:100306772	434.681	0.836807	0.251486	0.000876428	0.0328057	100306772	hnrpg	Heterogeneous nuclear ribonucleoprotein G
gene7661:100195915	273.344	0.589425	0.17724	0.000882342	0.0329736	100195915	eif3g	eukaryotic translation initiation factor 3, subunit G
gene26527:100380396	401.925	1.46235	0.439875	0.000885841	0.0330198	100380396	atad3	ATPase family AAA domain-containing protein 3
gene30962:106569838	428.898	-1.53554	0.461967	0.000887631	0.0330198	106569838	LOC106569838	major facilitator superfamily domain-containing protein 12-like
gene44322:106583236	242.564	3.45349	1.03901	0.000887867	0.0330198	106583236	endou	endonuclease, poly(U) specific
gene16194:106609295	142.804	1.27714	0.384347	0.000890955	0.0330283	106609295	LOC106609295	condensin-2 complex subunit H2-like
gene7849:100380463	1035.17	-0.696246	0.209515	0.000890102	0.0330283	100380463	hlf	Hepatic leukemia factor
gene20033:100196872	133.405	0.811479	0.244388	0.000898731	0.0330455	100196872	polr2i	RNA polymerase II subunit I
gene21207:106560365	178.336	-0.861489	0.259531	0.000902086	0.0330455	106560365	LOC106560365	desmoplakin-like
gene26270:106565388	271.39	3.42793	1.03291	0.000904299	0.0330455	106565388	LOC106565388	chymotrypsin-like elastase family member 2A
gene27818:100196854	288.418	1.14934	0.346113	0.000897867	0.0330455	100196854	prim1	DNA primase subunit 1
gene30011:106568929	1150.28	-0.566283	0.170504	0.000896211	0.0330455	106568929	LOC106568929	stress-associated endoplasmic reticulum protein 1-like
gene30976:106570124	94.5939	1.09141	0.328662	0.000897733	0.0330455	106570124	LOC106570124	basic salivary proline-rich protein 4-like
gene33128:106571961	1050.84	0.852154	0.256713	0.000901854	0.0330455	106571961	atp5e	ATP synthase, H+ transporting, mitochondrial F1 complex, epsilon subunit
gene37319:106576222	83.0993	-1.40774	0.423823	0.000895245	0.0330455	106576222	LOC106576222	uncharacterized LOC106576222
gene45574:106584334	308.168	0.798991	0.240739	0.000903676	0.0330455	106584334	LOC106584334	deoxynucleotidyltransferase terminal-interacting protein 2-like
gene25811:100196778	904.898	-1.27168	0.383689	0.000918548	0.0335132	100196778	tpc1	Two pore calcium channel protein 1
gene2993:106571225	829.161	1.01576	0.306579	0.000922355	0.033599	106571225	lmnb1	lamin B1
gene11430:106604773	216.565	0.842374	0.254323	0.000925587	0.0336508	106604773	LOC106604773	39S ribosomal protein L18, mitochondrial-like
gene6538:100195803	123.751	1.0705	0.323229	0.000926689	0.0336508	100195803	exos4	Exosome complex exonuclease RRP41
gene45617:106584357	3676.89	-0.609004	0.183917	0.000928657	0.0336693	106584357	LOC106584357	laminin subunit alpha-3-like
gene11148:100196397	351.562	0.964893	0.291621	0.000937217	0.0337483	100196397	tma20	Translation machinery-associated protein 20
gene20248:106613235	41.8071	-1.49772	0.452622	0.000936338	0.0337483	106613235	LOC106613235	F-BAR and double SH3 domains protein 2-like
gene23130:106562296	44.1635	1.45826	0.440831	0.000939734	0.0337483	106562296	LOC106562296	centromere protein N-B-like
gene23361:106562509	42.006	-1.21217	0.366507	0.000941849	0.0337483	106562509	LOC106562509	protein FAM214A-like
gene3714:106577462	297.526	3.83085	1.15802	0.000939314	0.0337483	106577462	LOC106577462	trypsin-like
gene40024:106578916	357.185	1.03566	0.312991	0.000936541	0.0337483	106578916	LOC106578916	mitochondrial import inner membrane translocase subunit Tim23
gene41257:106579947	370.151	0.899766	0.271901	0.000935749	0.0337483	106579947	LOC106579947	translational activator GCN1-like
gene43595:106582436	278.864	-0.783174	0.236813	0.000942528	0.0337483	106582436	LOC106582436	major histocompatibility complex class I-related gene protein-like
gene17114:100194739	141.994	1.01599	0.307296	0.000945593	0.0338057	100194739	abce1	ATP-binding cassette, sub-family E (OABP), member 1
gene20844:106613808	319.336	0.867676	0.262658	0.000955027	0.0340258	106613808	chaf1a	chromatin assembly factor 1 subunit A
gene28340:106567204	411.894	0.891217	0.269873	0.000958745	0.0340258	106567204	LOC106567204	tubulin alpha-8 chain-like
gene38830:106577684	206.812	1.06711	0.322982	0.000953406	0.0340258	106577684	LOC106577684	RNA-binding protein 4B-like
gene45901:106584628	199.304	-0.77794	0.235579	0.000959117	0.0340258	106584628	LOC106584628	protein phosphatase 1 regulatory subunit 15A-like
gene682:100380701	453.398	-0.577472	0.174861	0.000958388	0.0340258	100380701	LOC100380701	uncharacterized protein KIAA1109
gene55713:106592758	68.5818	-2.1283	0.644606	0.000960964	0.0340391	106592758	LOC106592758	multidrug resistance-associated protein 9-like
gene21090:106560272	303.308	-0.92007	0.278718	0.000963156	0.0340645	106560272	LOC106560272	circadian locomoter output cycles protein kaput-like
gene10447:106603897	233.23	1.20199	0.364295	0.000968614	0.0342051	106603897	LOC106603897	H/ACA ribonucleoprotein complex subunit 2-like protein
gene33569:106572387	120.952	-0.829529	0.251508	0.000972992	0.0343073	106572387	LOC106572387	rap1 GTPase-activating protein 1-like
gene12353:106605702	29.3358	3.46603	1.05136	0.00097823	0.0344394	106605702	LOC106605702	uncharacterized LOC106605702
gene48936:106587706	373.513	-1.80111	0.546555	0.00098287	0.03455	106587706	LOC106587706	uncharacterized LOC106587706
gene10220:100380749	952.416	0.932143	0.282947	0.000986285	0.0345649	100380749	LOC100380749	hypoxia up-regulated protein 1
gene42254:100380358	267.483	0.887547	0.269403	0.000985974	0.0345649	100380358	sfrs1	Splicing factor, arginine/serine-rich 1
gene22658:100306857	414.684	1.0912	0.331406	0.000992544	0.0347315	100306857	inceb	Inner centromere protein B
gene27350:100195457	734.465	0.733189	0.222817	0.000999974	0.0349386	100195457	adrm1	ADRM1 protein
gene10496:106603944	236.736	1.59365	0.484843	0.00101279	0.0349937	106603944	LOC106603944	complement component 1 Q subcomponent-binding protein, mitochondrial-like
gene16173:106609320	97.1586	-1.53778	0.468213	0.00102216	0.0349937	106609320	LOC106609320	patatin-like phospholipase domain-containing protein 2
gene17820:106610870	321.081	0.883875	0.269131	0.0010228	0.0349937	106610870	LOC106610870	uncharacterized transmembrane protein DDB_G0289901-like
gene20770:106613744	1261.85	0.811077	0.246941	0.00102166	0.0349937	106613744	LOC106613744	ATP synthase subunit delta, mitochondrial-like
gene23515:106562664	355.999	0.596582	0.181382	0.00100512	0.0349937	106562664	LOC106562664	proteasome subunit alpha type-4-like
gene25874:100196100	779.383	0.978162	0.297561	0.00101167	0.0349937	100196100	if6	Eukaryotic translation initiation factor 6
gene27238:106566187	863.409	0.727572	0.221622	0.00102731	0.0349937	106566187	LOC106566187	translation machinery-associated protein 7
gene27424:106566372	918.867	-0.895053	0.272616	0.00102635	0.0349937	106566372	LOC106566372	glutathione S-transferase Mu 3-like
gene27670:106566571	298.735	-0.891991	0.271685	0.00102642	0.0349937	106566571	LOC106566571	beta-1,4-galactosyltransferase 5-like
gene30690:106569579	449.359	0.942047	0.286402	0.00100454	0.0349937	106569579	lig1	DNA ligase 1
gene32331:100196785	209.549	-0.742063	0.225846	0.00101731	0.0349937	100196785	rhob	ras homolog family member B
gene35252:106574131	1459.13	0.833346	0.253613	0.00101658	0.0349937	106574131	psmd1	proteasome 26S subunit, non-ATPase 1
gene4145:100196466	218.531	3.82409	1.16324	0.00101104	0.0349937	100196466	vmo1	vitelline membrane outer layer 1 homolog
gene42188:106581040	38.7799	-1.23259	0.375238	0.0010205	0.0349937	106581040	exo5	exonuclease 5
gene4356:106583830	123.515	1.2171	0.370298	0.00101334	0.0349937	106583830	LOC106583830	dual specificity protein kinase Ttk-like
gene50888:100196531	65.786	1.04748	0.318831	0.0010184	0.0349937	100196531	rpp30	ribonuclease P/MRP 30 subunit
gene6145:106598911	53.4442	0.936174	0.28502	0.00102132	0.0349937	106598911	cdc7	cell division cycle 7
gene23976:100380571	130.271	-1.01222	0.308435	0.00103149	0.0350756	100380571	npdc1	neural proliferation, differentiation and control, 1
gene44988:106583751	453.915	1.36124	0.414828	0.00103275	0.0350756	106583751	LOC106583751	mesencephalic astrocyte-derived neurotrophic factor-like
gene46401:106585070	41.4318	-1.12037	0.341479	0.00103467	0.035089	106585070	LOC106585070	solute carrier family 23 member 2-like
gene14057:100194516	159.15	0.72017	0.219815	0.00105191	0.0353658	100194516	LOC100194516	protein LOC562437-like
gene21406:106560596	1236.91	1.192	0.363761	0.00104963	0.0353658	106560596	lmnb2	lamin B2
gene27723:106566650	897.393	-1.72686	0.526929	0.00104835	0.0353658	106566650	LOC106566650	ammonium transporter Rh type B pseudogene
gene2902:106570117	177.404	0.868343	0.264893	0.00104512	0.0353658	106570117	nup188	nucleoporin 188
gene37448:106576352	93.9717	1.12416	0.34304	0.00104894	0.0353658	106576352	orc5	origin recognition complex subunit 5
gene52969:106591797	84.159	1.672	0.510344	0.00105202	0.0353658	106591797	LOC106591797	protein disulfide-isomerase-like
gene28400:100196104	190.783	0.729262	0.222725	0.00105934	0.0354163	100196104	aurkaip1	aurora kinase A interacting protein 1
gene32122:106570981	137.828	-0.922907	0.281802	0.00105657	0.0354163	106570981	LOC106570981	probable global transcription activator SNF2L2
gene33236:100196204	321.035	1.21604	0.371316	0.00105682	0.0354163	100196204	ppih	peptidylprolyl isomerase H
gene39023:106577903	649.352	-0.968829	0.295899	0.00105965	0.0354163	106577903	LOC106577903	mannose-P-dolichol utilization defect 1 protein-like
gene9544:106602979	58.3991	-1.42702	0.435953	0.00106284	0.0354202	106602979	LOC106602979	phosphofurin acidic cluster sorting protein 1-like
gene9701:106603147	815.563	0.983275	0.300385	0.00106268	0.0354202	106603147	LOC106603147	barrier-to-autointegration factor
gene40610:106579447	169.849	0.99297	0.303446	0.00106673	0.0354986	106579447	LOC106579447	N-alpha-acetyltransferase 50
gene38333:106577251	196.967	1.09768	0.335495	0.00106856	0.0355085	106577251	LOC106577251	eukaryotic translation initiation factor 4E-like
gene61706:106592767	583.73	0.893106	0.273033	0.00107147	0.0355541	106592767	LOC106592767	acidic leucine-rich nuclear phosphoprotein 32 family member E-like
gene14908:100286649	2118.59	0.687443	0.210239	0.00107615	0.0356462	100286649	rs30	40S ribosomal protein S30
gene52099:106590561	134.911	1.02217	0.312638	0.00107733	0.0356462	106590561	LOC106590561	histone-lysine N-methyltransferase EZH2-like
gene51967:100196368	198.984	1.43777	0.439887	0.00108119	0.0357225	100196368	rrs1	ribosome biogenesis regulator homolog
gene49280:106588058	355.715	0.980864	0.300253	0.00108773	0.0358874	106588058	mrps11	mitochondrial ribosomal protein S11
gene50897:106589387	6320.49	0.639326	0.1958	0.00109388	0.0360389	106589387	LOC106589387	actin, aortic smooth muscle
gene7672:100194792	74.8877	1.2646	0.387375	0.00109646	0.0360724	100194792	mcm5	MCM5 minichromosome maintenance deficient 5 (S. cerevisiae)
gene28880:106568002	208.432	1.20615	0.369525	0.00109827	0.0360803	106568002	LOC106568002	arginine--tRNA ligase, cytoplasmic-like
gene21099:106560280	522.663	0.68866	0.211028	0.00110099	0.0361024	106560280	LOC106560280	multifunctional protein ADE2-like
gene2454:100136561	428.579	3.25028	0.996075	0.00110206	0.0361024	100136561	LOC100136561	bile salt-activated lipase
gene49056:100194646	349.826	0.816649	0.250326	0.00110497	0.0361462	100194646	LOC100194646	proteasome (prosome, macropain) 26S subunit, non-ATPase, 13
gene2848:100196660	7543.28	0.656399	0.201258	0.00110836	0.036206	100196660	ppia1	2-peptidylprolyl isomerase A
gene21530:106560701	56.2327	-0.929977	0.285176	0.00110994	0.0362064	106560701	prr5l	proline rich 5 like
gene34186:106573132	99.035	1.16773	0.358134	0.00111183	0.0362167	106573132	LOC106573132	endoplasmin-like
gene37738:100195104	473.995	1.30024	0.398929	0.00111679	0.0363273	100195104	tcpb	T-complex protein 1 subunit beta
gene1342:106607864	231.519	1.12901	0.346609	0.00112475	0.0364067	106607864	LOC106607864	kinesin-like protein KIF11
gene35096:106573949	211.394	-1.21102	0.371762	0.00112394	0.0364067	106573949	LOC106573949	sphingosine 1-phosphate receptor 1-like
gene50294:106588690	68.6947	-0.865505	0.265728	0.00112554	0.0364067	106588690	LOC106588690	triple functional domain protein-like
gene7768:106601395	218.692	1.46195	0.448798	0.00112408	0.0364067	106601395	LOC106601395	importin subunit alpha-1-like
gene51953:106590404	463.956	-0.77807	0.238917	0.00112736	0.0364145	106590404	LOC106590404	protein phosphatase 1 regulatory subunit 16A-like
gene9066:106602548	201.282	1.09025	0.334828	0.00112933	0.0364272	106602548	LOC106602548	coiled-coil domain-containing protein 86-like
gene28776:106567721	173.588	0.689954	0.211986	0.00113504	0.0365231	106567721	LOC106567721	probable ATP-dependent RNA helicase DDX10
gene29303:106568170	26.4978	1.39763	0.429764	0.00114559	0.0365231	106568170	LOC106568170	S-phase kinase-associated protein 2-like
gene32795:100195853	484.401	0.885239	0.272157	0.00114325	0.0365231	100195853	prs10	26S protease regulatory subunit S10B
gene35004:106573868	425.927	-0.998478	0.307004	0.00114464	0.0365231	106573868	LOC106573868	probable cation-transporting ATPase 13A3
gene38273:106577170	101.02	0.733156	0.225272	0.00113579	0.0365231	106577170	LOC106577170	peptidyl-prolyl cis-trans isomerase A-like
gene43534:106582367	399.81	0.9696	0.298129	0.00114482	0.0365231	106582367	LOC106582367	dnaJ homolog subfamily B member 11-like
gene4411:100380429	348.425	1.02327	0.314617	0.00114426	0.0365231	100380429	rcc1	regulator of chromosome condensation 1
gene46243:106585194	2568.5	-0.656004	0.201732	0.00114653	0.0365231	106585194	LOC106585194	cyclic AMP-responsive element-binding protein 3-like protein 3
gene48032:106586786	159.218	-0.720902	0.221535	0.00113742	0.0365231	106586786	LOC106586786	peripheral plasma membrane protein CASK-like
gene31432:106570297	318.817	1.33001	0.409214	0.00115337	0.0366676	106570297	LOC106570297	asparagine synthetase [glutamine-hydrolyzing]-like
gene48426:106587292	510.534	-0.683057	0.210174	0.00115425	0.0366676	106587292	LOC106587292	T-cell immunomodulatory protein-like
gene15842:106608950	94.9061	-1.18662	0.365175	0.00115627	0.0366815	106608950	LOC106608950	uncharacterized protein C7orf43 homolog
gene44653:106583491	131.348	-0.964524	0.296866	0.00115802	0.0366864	106583491	LOC106583491	DENN domain-containing protein 2D-like
gene30399:106569128	259.976	0.938786	0.289004	0.00116075	0.0367227	106569128	LOC106569128	DNA replication licensing factor mcm4-like
gene35921:106574843	41.4106	1.12999	0.347931	0.00116329	0.0367526	106574843	LOC106574843	transcription factor Dp-1-like
gene11751:106605109	208.546	0.978902	0.301743	0.00117797	0.0370643	106605109	LOC106605109	replication protein A 32 kDa subunit-like
gene14898:100217349	495.831	0.645993	0.199103	0.00117649	0.0370643	100217349	mmsa	Methylmalonate-semialdehyde dehydrogenase
gene48727:106587490	4310.1	0.647259	0.199513	0.0011778	0.0370643	106587490	LOC106587490	60S acidic ribosomal protein P2-like
gene35055:106573916	120.329	2.43611	0.751321	0.00118513	0.0371882	106573916	LOC106573916	interferon-induced protein 44-like
gene41557:100195156	59.5189	1.36791	0.421842	0.00118402	0.0371882	100195156	cdc45	cell division cycle 45
gene12352:106605700	355.254	4.17699	1.28846	0.00118757	0.0372091	106605700	LOC106605700	trypsin-2-like
gene20707:106613686	576.124	-0.899433	0.277474	0.00118902	0.0372091	106613686	LOC106613686	Krueppel-like factor 2
gene22481:106561641	88.0392	-1.39242	0.429912	0.00120012	0.0374972	106561641	LOC106561641	contactin-1a-like
gene41136:106580263	639.327	3.63363	1.122	0.00120147	0.0374972	106580263	LOC106580263	chymotrypsin-like elastase family member 2A
gene26536:100196488	179.409	0.984326	0.304119	0.00120941	0.0376191	100196488	cssa12h1orf50	chromosome ssa12 open reading frame, human C1orf50
gene33901:106572755	1997.41	-1.23047	0.380192	0.00121026	0.0376191	106572755	LOC106572755	cytochrome P450 2K1-like
gene54471:106594569	70.2757	1.42143	0.439096	0.00120715	0.0376191	106594569	LOC106594569	uncharacterized LOC106594569
gene31243:106569904	694.787	0.796534	0.246203	0.00121528	0.0376232	106569904	LOC106569904	proteasome subunit beta type-4-like
gene37021:100194995	445.03	1.20994	0.373963	0.00121449	0.0376232	100194995	nol5	Nucleolar protein 5
gene39914:106578814	109.838	1.12729	0.348434	0.00121515	0.0376232	106578814	mrps6	mitochondrial ribosomal protein S6
gene14566:106607768	67.7084	1.04658	0.323687	0.00122362	0.0378287	106607768	hddc2	HD domain containing 2
gene48751:106587512	102.165	0.990352	0.306331	0.00122519	0.0378287	106587512	LOC106587512	DNA-directed RNA polymerases I, II, and III subunit RPABC5
gene14095:106607316	94.8535	0.904466	0.279827	0.00122829	0.0378736	106607316	LOC106607316	tubulin gamma-1 chain
gene20971:100195740	95.3784	1.04402	0.323236	0.00123828	0.0381308	100195740	rfc4	replication factor C subunit 4
gene33292:106572163	555.973	3.71502	1.15058	0.00124307	0.0382273	106572163	LOC106572163	chymotrypsin-like elastase family member 2A
gene13749:106606977	95.7573	-0.815033	0.252513	0.00124797	0.0382761	106606977	LOC106606977	xylosyltransferase 2-like
gene26553:106565620	504.495	0.830532	0.25729	0.00124656	0.0382761	106565620	LOC106565620	small nuclear ribonucleoprotein E
gene13825:106607032	99.2413	1.08593	0.336716	0.00125945	0.038577	106607032	LOC106607032	40S ribosomal protein SA-like
gene22784:106561938	146.367	0.827202	0.256568	0.00126369	0.0386124	106561938	LOC106561938	39S ribosomal protein L21, mitochondrial-like
gene35238:106574147	707.576	0.939668	0.291457	0.00126395	0.0386124	106574147	ftsj3	FtsJ RNA methyltransferase homolog 3
gene28184:100195734	3504.12	0.703897	0.218353	0.00126564	0.038613	100195734	roa1	Heterogeneous nuclear ribonucleoprotein A1
gene35350:106574341	464.522	-0.669571	0.207903	0.00127923	0.038976	106574341	LOC106574341	insulin receptor substrate 2-like
gene1817:106612017	493.471	-1.42214	0.441801	0.00128654	0.0391472	106612017	chmp6	charged multivesicular body protein 6
gene8514:106602151	294.939	-1.32002	0.410209	0.00129125	0.0392389	106602151	LOC106602151	UPF0462 protein C4orf33 homolog
gene12311:100137024	904.958	3.48177	1.08306	0.00130549	0.0394122	100137024	trp-iii	trypsin III
gene18818:106611697	311.751	0.70204	0.218376	0.00130524	0.0394122	106611697	LOC106611697	mitochondrial import receptor subunit TOM5 homolog
gene1941:106560341	31.6165	1.71417	0.533139	0.00130338	0.0394122	106560341	LOC106560341	4-hydroxyphenylpyruvate dioxygenase-like protein
gene24770:106563910	971.511	-1.14297	0.355516	0.00130467	0.0394122	106563910	LOC106563910	hephaestin-like protein 1
gene46753:106585454	1433.85	0.833921	0.259346	0.00130227	0.0394122	106585454	LOC106585454	protein SET-like
gene11517:106604895	700.659	-1.23009	0.38269	0.00130749	0.0394209	106604895	LOC106604895	homeobox protein CDX-1-like
gene29950:106568981	733.471	1.00185	0.311737	0.00131011	0.0394484	106568981	LOC106568981	60S ribosomal protein L5-like
gene11589:106604942	80.5711	0.910404	0.283491	0.00132089	0.0397213	106604942	spdl1	spindle apparatus coiled-coil protein 1
gene17971:106610986	94.905	1.12447	0.350214	0.00132365	0.0397446	106610986	LOC106610986	transforming acidic coiled-coil-containing protein 3-like
gene41552:100306730	4225.93	0.544492	0.169598	0.00132511	0.0397446	100306730	rl6	60S ribosomal protein L6
gene10356:106603807	141.35	-0.778887	0.2428	0.0013369	0.0397476	106603807	sytl2	synaptotagmin like 2
gene10365:100195936	548.733	0.773893	0.241151	0.00133121	0.0397476	100195936	skp1	S-phase kinase-associated protein 1
gene12053:106605457	445.389	-1.64479	0.512855	0.0013407	0.0397476	106605457	LOC106605457	zinc transporter ZIP1-like
gene15514:106608671	26.6163	1.94628	0.606634	0.00133514	0.0397476	106608671	LOC106608671	Y-box-binding protein 2-A-like
gene35431:100136558	1758.42	0.836133	0.260538	0.0013308	0.0397476	100136558	LOC100136558	signal transducer and activator of transcription 1 alpha
gene41669:106580556	268.21	-0.742272	0.231376	0.00133624	0.0397476	106580556	LOC106580556	dedicator of cytokinesis protein 8-like
gene47464:106586236	132.626	1.28543	0.40075	0.00133867	0.0397476	106586236	LOC106586236	cell division cycle-associated protein 7-like
gene50644:106589074	451.066	-0.653666	0.203803	0.00133968	0.0397476	106589074	LOC106589074	uncharacterized LOC106589074
gene6360:106599461	63.7586	-1.17263	0.365314	0.00132769	0.0397476	106599461	LOC106599461	solute carrier organic anion transporter family member 5A1-like
gene18399:106611450	94.4771	-0.846116	0.263961	0.00134846	0.0399266	106611450	cssa09h20orf194	chromosome ssa09 open reading frame, human C20orf194
gene1469:106609363	81.9343	0.963649	0.300668	0.00135051	0.039936	106609363	LOC106609363	heat-stable enterotoxin receptor-like
gene16681:106609767	148.999	0.991588	0.309461	0.00135419	0.0399424	106609767	LOC106609767	KRR1 small subunit processome component homolog
gene6080:100195330	94.455	0.827893	0.258355	0.0013531	0.0399424	100195330	fytd1	Forty-two-three domain-containing protein 1
gene43140:106581982	32.6031	2.3595	0.736516	0.0013572	0.0399804	106581982	LOC106581982	UDP-glucuronic acid decarboxylase 1-like
gene10162:106603436	28.8018	-1.52106	0.474913	0.00136094	0.0400185	106603436	LOC106603436	NADPH--cytochrome P450 reductase-like
gene13902:106607209	309.311	0.665567	0.207821	0.00136196	0.0400185	106607209	LOC106607209	eukaryotic translation initiation factor 3 subunit G
gene26956:106566034	316.835	-1.16194	0.362954	0.00136785	0.0401199	106566034	LOC106566034	uncharacterized LOC106566034
gene41068:106580112	162.39	0.7232	0.22592	0.00136889	0.0401199	106580112	pole	DNA polymerase epsilon, catalytic subunit
gene10015:106603552	196.062	-0.734562	0.229509	0.00137151	0.0401457	106603552	LOC106603552	nuclear receptor-interacting protein 1-like
gene45563:106584322	397.89	1.48757	0.464907	0.00137558	0.0402139	106584322	LOC106584322	torsin-3A-like
gene11596:106604950	1337.51	1.08712	0.339964	0.00138502	0.0404387	106604950	LOC106604950	stress-70 protein, mitochondrial
gene16195:106609294	114.677	-1.07903	0.337493	0.00138778	0.0404681	106609294	LOC106609294	suppressor of cytokine signaling 2-like
gene3542:100380365	238.965	0.927276	0.290346	0.00140468	0.0406351	100380365	nol1	RNA methyltransferase NOL1
gene35759:106574672	153.211	3.47274	1.08742	0.0014053	0.0406351	106574672	LOC106574672	uncharacterized LOC106574672
gene43766:100194597	4822.08	1.09997	0.344299	0.00139922	0.0406351	100194597	ahcy	adenosylhomocysteinase
gene4595:106585544	569.844	0.731293	0.228998	0.00140582	0.0406351	106585544	LOC106585544	collagen alpha-6(VI) chain-like
gene47704:106586468	39.1484	0.987692	0.309246	0.00140376	0.0406351	106586468	LOC106586468	calcium/calmodulin-dependent 3',5'-cyclic nucleotide phosphodiesterase 1A-like
gene51081:106589549	436.186	-0.89588	0.28045	0.00140103	0.0406351	106589549	snx29	sorting nexin 29
gene6813:106600492	865.491	0.655572	0.205258	0.00140367	0.0406351	106600492	LOC106600492	succinate dehydrogenase cytochrome b560 subunit, mitochondrial-like
gene13695:100196577	4209.01	0.599264	0.187749	0.00141369	0.0408114	100196577	rl3	60S ribosomal protein L3
gene22157:100286555	850.485	0.742389	0.232719	0.00142241	0.0410119	100286555	rs17	40S ribosomal protein S17
gene47182:106585935	825.955	-1.34726	0.42245	0.00142685	0.0410886	106585935	LOC106585935	nucleotide-binding oligomerization domain-containing protein 1-like
gene32831:100136567	4896.4	0.588426	0.18453	0.00142873	0.0410915	100136567	rps7	40S ribosomal protein S7
gene18812:106611702	517.619	0.916282	0.287521	0.00143838	0.0412018	106611702	LOC106611702	pre-mRNA-processing factor 19-like
gene25374:106564522	96.1667	0.996566	0.312863	0.00144599	0.0412018	106564522	LOC106564522	dnaJ homolog subfamily A member 3, mitochondrial-like
gene36713:106575628	154.648	1.09415	0.3435	0.00144609	0.0412018	106575628	LOC106575628	angio-associated migratory cell protein-like
gene3690:106577194	1782.14	0.93662	0.294059	0.00144684	0.0412018	106577194	LOC106577194	40S ribosomal protein S9
gene4016:106580348	451.127	0.80624	0.253092	0.00144476	0.0412018	106580348	LOC106580348	T-complex protein 1 subunit gamma-like
gene45010:106583771	1193.86	0.718922	0.225578	0.00143744	0.0412018	106583771	gmppb	GDP-mannose pyrophosphorylase B
gene5232:100196419	69.5798	0.979866	0.307464	0.00143793	0.0412018	100196419	kith	Thymidine kinase, cytosolic
gene9380:106602839	490.698	0.739582	0.232143	0.00144312	0.0412018	106602839	crcp	CGRP receptor component
gene19023:106611963	202.518	0.944198	0.296544	0.00145252	0.0412367	106611963	polr1a	RNA polymerase I subunit A
gene36602:106575511	246.777	-0.962376	0.302259	0.00145281	0.0412367	106575511	LOC106575511	guanine nucleotide exchange factor DBS-like
gene42499:106581351	1827.99	-0.565814	0.177715	0.00145342	0.0412367	106581351	ngef	neuronal guanine nucleotide exchange factor
gene12351:100195866	494.079	3.93091	1.2353	0.00146184	0.0413234	100195866	tryp	Trypsin
gene27206:106566159	936.325	3.61578	1.13626	0.00146173	0.0413234	106566159	LOC106566159	elastase-1
gene44157:106583012	307.705	1.05068	0.330159	0.00146087	0.0413234	106583012	LOC106583012	guanine nucleotide-binding protein-like 3
gene28862:106568019	1932.07	0.667695	0.209941	0.00147072	0.0415235	106568019	LOC106568019	cytochrome c oxidase subunit 7B, mitochondrial-like
gene2265:106563557	663.75	0.774549	0.243649	0.00147806	0.0416598	106563557	LOC106563557	uncharacterized LOC106563557
gene29152:106568029	360.821	0.897314	0.282286	0.00147915	0.0416598	106568029	LOC106568029	60S ribosomal protein L36a-like
gene52227:100196225	645.199	3.36017	1.05733	0.00148314	0.0417211	100196225	cbpb1	Carboxypeptidase B
gene20974:106613922	138.081	1.03743	0.32653	0.00148745	0.0417408	106613922	ect2	epithelial cell transforming 2
gene24224:106563379	76.5796	2.11385	0.665275	0.00148598	0.0417408	106563379	LOC106563379	endonuclease domain-containing 1 protein-like
gene31170:106569971	28.6408	1.23363	0.388397	0.00149212	0.041821	106569971	LOC106569971	transcription factor 19-like
gene74293:106590999	141.256	-0.980105	0.30866	0.00149656	0.0418945	106590999	LOC106590999	oxysterol-binding protein-related protein 10-like
gene2042:106561374	90.7565	-0.842798	0.265535	0.00150372	0.0419232	106561374	LOC106561374	zinc finger protein 462-like
gene4129:106581844	901.387	0.652314	0.205551	0.00150621	0.0419232	106581844	LOC106581844	RNA-binding protein 8A
gene4421:106584953	1280.75	-0.712507	0.2245	0.00150484	0.0419232	106584953	LOC106584953	spectrin beta chain, non-erythrocytic 1-like
gene48375:106587140	539.501	-0.91863	0.289478	0.00150666	0.0419232	106587140	LOC106587140	matrix metalloproteinase-15-like
gene7620:106601250	132.375	-0.779756	0.245639	0.00150146	0.0419232	106601250	LOC106601250	MKL/myocardin-like protein 1
gene40765:100196000	656.763	0.861319	0.27172	0.00152505	0.0423838	100196000	fen1	flap structure-specific endonuclease 1
gene34949:106573828	62.0841	1.45689	0.459751	0.00153029	0.0424274	106573828	LOC106573828	tumor necrosis factor alpha-induced protein 8-like protein 1
gene50916:106589405	242.019	1.03503	0.326617	0.00153	0.0424274	106589405	msh2	mutS homolog 2
gene56886:106592653	64.9523	1.22202	0.385918	0.00154271	0.0427204	106592653	LOC106592653	uncharacterized LOC106592653
gene14769:100194920	428.625	1.23453	0.389922	0.00154506	0.0427342	100194920	acat2	acetyl-CoA acetyltransferase 2
gene21269:106560451	115.931	0.898583	0.283869	0.00154823	0.0427707	106560451	znhit6	zinc finger HIT-type containing 6
gene47049:106585800	175.086	1.01662	0.321196	0.00155034	0.0427779	106585800	nol6	nucleolar protein 6
gene23560:100194891	85.0305	0.92718	0.29307	0.00155786	0.042934	100194891	sycc	Cysteinyl-tRNA synthetase, cytoplasmic
gene51965:106590399	64.4836	0.884819	0.279742	0.00156162	0.0429863	106590399	LOC106590399	myb-related protein A-like
gene38323:106577185	52.5455	-0.927585	0.293299	0.00156369	0.0429923	106577185	LOC106577185	methylcytosine dioxygenase TET1-like
gene9175:106602746	38.6888	1.52603	0.482987	0.00158003	0.0433899	106602746	mnd1	meiotic nuclear divisions 1
gene5568:106595274	132.361	1.48305	0.469435	0.00158197	0.0433913	106595274	LOC106595274	OX-2 membrane glycoprotein-like
gene13167:106606515	207.441	0.970596	0.307422	0.00159284	0.0436047	106606515	LOC106606515	uncharacterized LOC106606515
gene45056:106583814	244.247	0.842966	0.267007	0.00159352	0.0436047	106583814	pdhb	pyruvate dehydrogenase E1 beta subunit
gene13661:106606898	36.2157	1.42592	0.451871	0.0016017	0.0436218	106606898	LOC106606898	uncharacterized LOC106606898
gene14687:106607860	835.893	-0.693117	0.219617	0.00159936	0.0436218	106607860	LOC106607860	epoxide hydrolase 1-like
gene24231:106563387	344.781	-0.735319	0.233019	0.00160159	0.0436218	106563387	LOC106563387	uncharacterized LOC106563387
gene32495:106571302	88.4009	1.05716	0.334923	0.00159715	0.0436218	106571302	LOC106571302	nucleoporin Nup43-like
gene4248:106582879	1370.47	0.887232	0.28121	0.0016047	0.0436519	106582879	LOC106582879	uncharacterized LOC106582879
gene44298:106583080	119.175	1.18743	0.376442	0.0016086	0.0437067	106583080	LOC106583080	tripartite motif-containing protein 16-like protein
gene11124:106604455	4365.06	0.589156	0.187037	0.00163302	0.0437525	106604455	LOC106604455	60S ribosomal protein L36a-like
gene15191:106608372	1101.13	-0.51987	0.165035	0.00163233	0.0437525	106608372	iyd	iodotyrosine deiodinase
gene16330:106609386	79.3012	1.53864	0.488427	0.00163166	0.0437525	106609386	LOC106609386	poly [ADP-ribose] polymerase 12-like
gene1681:100286678	384.397	1.02025	0.323711	0.00162304	0.0437525	100286678	if4e	Eukaryotic translation initiation factor 4E
gene20639:106613629	173.676	0.791352	0.251156	0.00162806	0.0437525	106613629	LOC106613629	U6 snRNA-associated Sm-like protein LSm4
gene2342:100380465	133.047	1.17242	0.371975	0.00162224	0.0437525	100380465	cor1c	Coronin-1C
gene250:100195585	332.606	0.919543	0.29187	0.00162976	0.0437525	100195585	znf593	zinc finger protein 593
gene26617:100380455	41.3891	1.22501	0.388604	0.00161976	0.0437525	100380455	f262	6-phosphofructo-2-kinase/fructose-2,6-biphosphatase 2
gene32871:100194612	3006.9	0.535133	0.169862	0.00163051	0.0437525	100194612	fau	Finkel-Biskis-Reilly murine sarcoma virus (FBR-MuSV) ubiquitously expressed (fox derived); ribosomal protein S30
gene34062:106572911	158.395	-0.736375	0.233594	0.0016195	0.0437525	106572911	LOC106572911	CD82 antigen-like
gene47657:106586427	90.9876	-1.64682	0.522695	0.00162918	0.0437525	106586427	LOC106586427	sterile alpha motif domain-containing protein 9-like
gene50255:106588679	239.493	0.917512	0.291157	0.0016257	0.0437525	106588679	LOC106588679	actin-binding protein anillin-like
gene10697:106604122	29.1282	-1.96759	0.625005	0.00164324	0.0438735	106604122	LOC106604122	neuropeptide Y receptor type 2-like
gene14682:106607856	72.2142	0.959575	0.304796	0.00164252	0.0438735	106607856	LOC106607856	putative peptidyl-tRNA hydrolase PTRHD1
gene28111:106567008	529.554	0.890976	0.282985	0.00164112	0.0438735	106567008	LOC106567008	prostaglandin E synthase 3-like
gene23985:106563120	61.7978	1.35056	0.429134	0.00164855	0.0439139	106563120	LOC106563120	small nuclear ribonucleoprotein Sm D3
gene38894:106577792	49.6616	1.05375	0.334818	0.00164832	0.0439139	106577792	LOC106577792	39S ribosomal protein L52, mitochondrial-like
gene26436:100195318	189.36	1.14792	0.364885	0.00165533	0.0440436	100195318	ruvb1	RuvB-like 1
gene40796:106579677	75.9948	-1.0913	0.347117	0.0016671	0.0442549	106579677	LOC106579677	collagen alpha-1(XVIII) chain-like
gene4706:106587585	334.078	0.964515	0.30678	0.00166657	0.0442549	106587585	LOC106587585	39S ribosomal protein L4, mitochondrial-like
gene17089:106610183	6401.84	0.649728	0.20676	0.00167549	0.044389	106610183	LOC106610183	40S ribosomal protein S3a
gene24760:100195478	1299.53	0.935381	0.29767	0.001676	0.044389	100195478	cct8	chaperonin containing TCP1 subunit 8
gene27199:106566144	356.943	-0.784498	0.249694	0.00167894	0.044416	106566144	LOC106566144	uncharacterized LOC106566144
gene2251:100195334	384.762	0.975812	0.310707	0.00168594	0.0445501	100195334	k0020	K0020 protein
gene2474:106565595	317.676	-0.735536	0.234228	0.00168796	0.0445525	106565595	LOC106565595	ATP-dependent RNA helicase DQX1-like
gene38601:106577502	43.6384	1.15768	0.368748	0.00169247	0.0445697	106577502	LOC106577502	mitotic spindle assembly checkpoint protein MAD2A-like
gene47373:106586142	464.851	1.95912	0.623998	0.00169167	0.0445697	106586142	LOC106586142	signal transducer and activator of transcription 1-alpha/beta-like
gene43529:100380547	152.79	0.895637	0.285358	0.00169733	0.0446229	100380547	dbr1	debranching enzyme homolog 1 (S. cerevisiae)
gene46632:106585579	28.8017	1.36161	0.433892	0.00170029	0.0446229	106585579	LOC106585579	uncharacterized LOC106585579
gene65834:106592832	57.761	-0.985298	0.313949	0.00169873	0.0446229	106592832	LOC106592832	protein phosphatase 1 regulatory subunit 12A-like
gene50871:106589369	48.1162	1.54698	0.493046	0.00170335	0.0446525	106589369	cep55	centrosomal protein 55
gene41294:106579922	182.146	-0.819508	0.261329	0.00171316	0.0448377	106579922	LOC106579922	E3 ubiquitin-protein ligase DTX1-like
gene43158:106582027	198.174	0.746968	0.238212	0.0017143	0.0448377	106582027	mrpl30	mitochondrial ribosomal protein L30
gene10653:106604083	150.79	-1.90263	0.60701	0.00172185	0.0449843	106604083	LOC106604083	multidrug resistance-associated protein 9-like
gene47110:106585863	145.446	-1.04828	0.334598	0.00173048	0.0451078	106585863	rasef	RAS and EF-hand domain containing
gene73312:106594610	253.846	1.7152	0.547426	0.00172906	0.0451078	106594610	LOC106594610	uncharacterized LOC106594610
gene13392:106606744	102.573	-1.22345	0.390783	0.00174355	0.0453506	106606744	LOC106606744	C-Jun-amino-terminal kinase-interacting protein 4-like
gene1733:106612695	1268.21	-0.622385	0.198841	0.00174765	0.0453506	106612695	LOC106612695	dystonin-like
gene40673:106579555	528.694	0.579095	0.184999	0.00174648	0.0453506	106579555	ssr1	signal sequence receptor subunit 1
gene5127:106591333	146.447	-0.953393	0.304581	0.00174697	0.0453506	106591333	LOC106591333	ligand-dependent corepressor-like
gene3713:106577461	344.739	3.66601	1.17143	0.00175086	0.045383	106577461	LOC106577461	trypsin-2-like
gene18469:106611516	1515.21	0.776935	0.248373	0.00175944	0.0454389	106611516	LOC106611516	60S ribosomal protein L39-like
gene3031:106571564	6944.01	0.665506	0.212848	0.00176796	0.0454389	106571564	LOC106571564	tropomyosin beta chain
gene31863:106570728	41.4732	-1.56839	0.501597	0.00176729	0.0454389	106570728	LOC106570728	protein L-Myc-1b-like
gene34932:106573542	1112.63	0.766591	0.245188	0.00176876	0.0454389	106573542	LOC106573542	scaffold attachment factor B2-like
gene37547:106576452	133.949	1.0625	0.339821	0.00176809	0.0454389	106576452	LOC106576452	poly [ADP-ribose] polymerase 12-like
gene42970:106581789	60.8239	1.08193	0.345865	0.00175884	0.0454389	106581789	spc25	SPC25, NDC80 kinetochore complex component
gene48249:106587030	260.47	1.05419	0.337127	0.00176614	0.0454389	106587030	mak16	MAK16 homolog
gene9408:106602869	160.688	1.30211	0.416339	0.00176278	0.0454389	106602869	ruvbl2	RuvB like AAA ATPase 2
gene15747:106608866	120.026	-1.3343	0.426934	0.00177617	0.0455662	106608866	LOC106608866	uncharacterized LOC106608866
gene37595:100306833	65.3705	1.04183	0.333378	0.00177766	0.0455662	100306833	imdh1	Inosine-5-monophosphate dehydrogenase 1
gene52195:106590660	341.63	-0.899449	0.287887	0.00178219	0.045581	106590660	LOC106590660	XK-related protein 9-like
gene6915:106600554	8838.42	0.63552	0.2034	0.00178118	0.045581	106600554	LOC106600554	glycine-rich RNA-binding protein-like
gene10507:106603954	53.8629	-0.952941	0.305055	0.00178512	0.0455961	106603954	LOC106603954	E3 ubiquitin-protein ligase RNF43-like
gene18755:106611747	310.903	-0.600651	0.19231	0.00178803	0.0455961	106611747	LOC106611747	ligand of Numb protein X 2-like
gene4738:106587357	1016.54	0.778867	0.249378	0.0017887	0.0455961	106587357	LOC106587357	ATP-dependent RNA helicase DDX39A
gene22370:106561524	34.7305	1.20683	0.386516	0.00179427	0.0456876	106561524	tdrd12	tudor domain containing 12
gene31139:106569998	869.749	0.62349	0.199748	0.00180004	0.0457338	106569998	LOC106569998	cytochrome c oxidase subunit 6B1-like
gene31317:106570206	197.871	0.983063	0.314938	0.00179964	0.0457338	106570206	mrpl9	mitochondrial ribosomal protein L9
gene14532:100196210	158.211	0.773147	0.247803	0.00180847	0.0457405	100196210	ppil4	peptidylprolyl isomerase like 4
gene19065:106612051	479.315	0.941822	0.301805	0.00180462	0.0457405	106612051	pfdn6	prefoldin subunit 6
gene25697:106564888	459.144	-0.749353	0.240133	0.00180498	0.0457405	106564888	LOC106564888	testis-expressed sequence 2 protein-like
gene43995:106582836	26.6076	1.59356	0.510802	0.00181021	0.0457405	106582836	mybl2	MYB proto-oncogene like 2
gene9062:106602551	82.8992	-1.38221	0.442969	0.00180651	0.0457405	106602551	LOC106602551	uncharacterized LOC106602551
gene20968:100195491	65.04	1.14409	0.366829	0.0018155	0.045824	100195491	k0841	K0841 protein
gene22246:106561381	250.005	-0.709995	0.227715	0.00182141	0.0459229	106561381	LOC106561381	transmembrane and TPR repeat-containing protein 2-like
gene37076:106575997	238.268	0.706553	0.226682	0.0018274	0.0460237	106575997	LOC106575997	cysteine-rich with EGF-like domain protein 2
gene30834:100196580	404.658	0.522977	0.167818	0.00183113	0.0460675	100196580	rl37a	60S ribosomal protein L37a
gene11047:100195123	177.217	0.944949	0.303425	0.00184394	0.0462789	100195123	pola2	DNA polymerase alpha 2, accessory subunit
gene14771:106607972	267.283	-0.727488	0.233617	0.00184555	0.0462789	106607972	plekhg1	pleckstrin homology and RhoGEF domain containing G1
gene43987:106582829	1691.51	1.02668	0.329676	0.00184442	0.0462789	106582829	LOC106582829	parathymosin-like
gene34466:106573332	1373.57	0.500444	0.160782	0.00185468	0.0464073	106573332	rps17	ribosomal protein S17
gene769:106601189	1281.23	-0.739674	0.237619	0.00185285	0.0464073	106601189	ralgapa1	Ral GTPase activating protein catalytic alpha subunit 1
gene31748:106570608	324.836	0.779458	0.250516	0.00186199	0.0464895	106570608	LOC106570608	small nuclear ribonucleoprotein Sm D1
gene64198:106595643	39.8195	1.53031	0.491827	0.00186155	0.0464895	106595643	LOC106595643	uncharacterized protein C11orf98 homolog
gene11806:106605153	2030.69	0.911633	0.293146	0.00187195	0.046671	106605153	LOC106605153	uncharacterized LOC106605153
gene20385:106613374	133.876	0.979524	0.315063	0.00187735	0.046671	106613374	exosc5	exosome component 5
gene2174:100196254	312.092	0.911477	0.29312	0.00187357	0.046671	100196254	denr	density regulated re-initiation and release factor
gene41595:106580467	348.397	0.974665	0.313483	0.00187631	0.046671	106580467	LOC106580467	ran-specific GTPase-activating protein-like
gene1068:100195485	1322.3	-0.710039	0.228551	0.00189186	0.0467299	100195485	abhd12	abhydrolase domain containing 12
gene20156:106613145	332.221	-1.10757	0.356492	0.00189096	0.0467299	106613145	LOC106613145	von Willebrand factor A domain-containing protein 5A-like
gene23121:106562286	374.112	1.17828	0.379221	0.00188926	0.0467299	106562286	LOC106562286	cytochrome c oxidase subunit 4 isoform 1, mitochondrial-like
gene32430:100306849	49.9331	1.21617	0.391311	0.00188391	0.0467299	100306849	LOC100306849	mitotic checkpoint serine/threonine-protein kinase BUB1
gene44313:100195433	293.713	1.25582	0.404203	0.00189054	0.0467299	100195433	mep50	Methylosome protein 50
gene6709:100380467	212.849	1.14446	0.36838	0.00189175	0.0467299	100380467	mc6zb	Zygotic DNA replication licensing factor mcm6-B
gene34609:106573483	1177.19	2.98932	0.962557	0.00189889	0.0468534	106573483	LOC106573483	uncharacterized LOC106573483
gene21351:100306840	280.468	0.81769	0.263396	0.00190658	0.046993	100306840	ivns1abp	influenza virus NS1A binding protein
gene32771:106571672	530.913	0.825976	0.266116	0.00191041	0.0469995	106571672	LOC106571672	eukaryotic translation initiation factor 2 subunit 1
gene47053:106585803	519.195	-1.15974	0.373658	0.00191091	0.0469995	106585803	LOC106585803	rho-related BTB domain-containing protein 2-like
gene18672:100136528	714.332	0.848275	0.273472	0.00192299	0.0472208	100136528	ran1	Ran protein
gene28896:100195044	187.339	0.925171	0.298277	0.001924	0.0472208	100195044	eral	GTP-binding protein era homolog
gene10350:106603799	934.254	0.774611	0.249832	0.00193175	0.0472685	106603799	LOC106603799	small nuclear ribonucleoprotein Sm D2-like
gene8242:106601877	144.059	0.936112	0.301919	0.00193166	0.0472685	106601877	LOC106601877	elongation factor Tu, mitochondrial-like
gene9918:106603375	158.945	1.16567	0.375966	0.00193208	0.0472685	106603375	ercc6l	ERCC excision repair 6 like, spindle assembly checkpoint helicase
gene1025:100286600	243.286	1.12093	0.361581	0.00193471	0.0472753	100286600	npm3	nucleophosmin/nucleoplasmin 3
gene31849:106570717	54.7592	-1.32909	0.428767	0.00193646	0.0472753	106570717	LOC106570717	hephaestin-like protein 1
gene19215:106612202	179.111	-0.662918	0.213913	0.00194168	0.0473529	106612202	LOC106612202	leucine-rich repeat extensin-like protein 5
gene34872:106573602	435.303	0.627253	0.202535	0.00195482	0.0475728	106573602	LOC106573602	ATP synthase subunit delta, mitochondrial-like
gene39182:106578072	1986.64	0.980653	0.316619	0.00195316	0.0475728	106578072	cct7	chaperonin containing TCP1 subunit 7
gene25577:106564730	42.2954	0.949431	0.30664	0.00195993	0.0476468	106564730	LOC106564730	actin, alpha skeletal muscle 2-like
gene21385:106560578	613.829	0.782815	0.252943	0.00196924	0.0478228	106560578	LOC106560578	prohibitin-2-like
gene13998:106607124	48.7345	1.10223	0.356191	0.0019715	0.0478275	106607124	LOC106607124	ribosomal RNA-processing protein 7 homolog A-like
gene1618:100196698	562.064	-0.860495	0.27813	0.0019757	0.0478354	100196698	perp	PERP, TP53 apoptosis effector
gene34791:106573682	2307.92	0.843052	0.272495	0.00197597	0.0478354	106573682	cotl1	coactosin like F-actin binding protein 1
gene28304:106567171	232.39	1.08124	0.349592	0.00198239	0.0478964	106567171	racgap1	Rac GTPase activating protein 1
gene35246:106574141	640.172	0.572562	0.185126	0.00198264	0.0478964	106574141	LOC106574141	NADH dehydrogenase [ubiquinone] 1 beta subcomplex subunit 5, mitochondrial-like
gene48954:106587720	701.829	-1.44201	0.466372	0.00198831	0.0479834	106587720	LOC106587720	EGF-like repeat and discoidin I-like domain-containing protein 3
gene29103:106567806	736.205	0.705278	0.228137	0.00199171	0.0480151	106567806	LOC106567806	non-histone chromosomal protein HMG-14A-like
gene26656:106565847	540.113	0.776648	0.251287	0.00199701	0.0480928	106565847	LOC106565847	26S proteasome non-ATPase regulatory subunit 6-like
gene17558:106610614	114.645	-0.957391	0.309898	0.00200576	0.0481044	106610614	ero1a	endoplasmic reticulum oxidoreductase 1 alpha
gene20429:106613416	68.1089	-0.936272	0.302999	0.00200144	0.0481044	106613416	LOC106613416	E3 ubiquitin-protein ligase HERC2-like
gene47658:106586429	273.809	1.50337	0.486641	0.00200641	0.0481044	106586429	LOC106586429	sterile alpha motif domain-containing protein 9-like
gene48156:100380276	1228.88	0.87529	0.283351	0.00200791	0.0481044	100380276	tba	tubulin, alpha 8 like 3-1
gene80806:106594277	79.1351	-1.21022	0.39174	0.00200593	0.0481044	106594277	LOC106594277	TBC1 domain family member 1-like
gene16677:106609764	534.51	0.787535	0.254983	0.00201119	0.0481197	106609764	LOC106609764	nucleosome assembly protein 1-like 1-A
gene51105:100196145	239.571	0.834652	0.270258	0.00201271	0.0481197	100196145	pgp	phosphoglycolate phosphatase
gene15071:106608256	812.333	-0.826575	0.267722	0.00201892	0.0482182	106608256	LOC106608256	formin-like
gene49594:106588135	308.428	3.61152	1.17004	0.00202424	0.0482952	106588135	LOC106588135	chymotrypsin A-like
gene16392:106609503	49.1612	1.22069	0.395642	0.00203324	0.0484099	106609503	LOC106609503	forkhead box protein M1-like
gene20768:106613741	6298.02	0.865716	0.280567	0.00203143	0.0484099	106613741	LOC106613741	cold-inducible RNA-binding protein B-like
gene2157:100195051	113.372	0.78578	0.254713	0.00203582	0.0484214	100195051	enoph	Enolase-phosphatase E1
gene57055:106591460	180.413	-1.98372	0.643388	0.0020476	0.0486515	106591460	LOC106591460	NACHT, LRR and PYD domains-containing protein 12-like
gene21868:106560882	32.347	1.26517	0.410402	0.00205097	0.0486624	106560882	chtf8	chromosome transmission fidelity factor 8
gene37384:106576277	56.7068	1.2745	0.413455	0.00205227	0.0486624	106576277	LOC106576277	PCNA-interacting partner-like
gene11016:106604388	402.032	-0.572724	0.185878	0.00206181	0.0487572	106604388	LOC106604388	protein IWS1 homolog A-like
gene11847:106605230	178.738	-1.01207	0.328508	0.00206451	0.0487572	106605230	LOC106605230	GRAM domain-containing protein 1A-like
gene18087:106611156	99.7864	0.977632	0.317251	0.00205912	0.0487572	106611156	LOC106611156	protein FAM98B-like
gene19680:106612601	685.202	0.748362	0.242914	0.00206471	0.0487572	106612601	LOC106612601	eukaryotic translation initiation factor 3 subunit K
gene1416:106608573	5889.95	0.828195	0.268907	0.002071	0.0488059	106608573	LOC106608573	voltage-dependent anion-selective channel protein 2-like
gene30767:106569653	414.646	-0.970894	0.315212	0.00206909	0.0488059	106569653	LOC106569653	receptor-type tyrosine-protein phosphatase F-like
gene19675:106612607	470.054	0.982367	0.319069	0.00207796	0.0488088	106612607	LOC106612607	heterogeneous nuclear ribonucleoprotein L-like
gene24434:106563585	866.634	0.783842	0.254633	0.00208169	0.0488088	106563585	LOC106563585	eukaryotic translation initiation factor 1A, X-chromosomal-like
gene33662:106572525	30.0984	-1.31864	0.428231	0.0020751	0.0488088	106572525	LOC106572525	serine/threonine-protein phosphatase 6 regulatory ankyrin repeat subunit C-like
gene38628:106577530	176.605	0.875044	0.284252	0.00208109	0.0488088	106577530	LOC106577530	RNA-binding protein 4.1-like
gene9809:106603279	1024.41	-0.579266	0.188133	0.00207684	0.0488088	106603279	LOC106603279	unconventional myosin-XVIIIa-like
gene14527:106607742	161.017	1.27073	0.412845	0.00208397	0.0488128	106607742	LOC106607742	ribosome production factor 2 homolog
gene48211:106586968	112.544	-0.799824	0.260012	0.00209723	0.0490735	106586968	qsox2	quiescin sulfhydryl oxidase 2
gene10120:106603463	56.1538	1.0652	0.346625	0.00211866	0.0491028	106603463	rad51c	RAD51 paralog C
gene11550:106604909	1045.17	-0.875045	0.284889	0.00212967	0.0491028	106604909	LOC106604909	glutamine--fructose-6-phosphate aminotransferase [isomerizing] 2-like
gene11586:106604938	112.196	1.06424	0.346124	0.00210686	0.0491028	106604938	LOC106604938	heterogeneous nuclear ribonucleoprotein A0-like
gene12190:106605532	979.049	0.937304	0.305147	0.00212882	0.0491028	106605532	LOC106605532	protein LYRIC-like
gene13809:106607046	81.5897	1.24109	0.404151	0.00213436	0.0491028	106607046	LOC106607046	kinetochore protein Spc24-like
gene26652:100136920	131.427	2.07093	0.673961	0.0021208	0.0491028	100136920	mx2	myxovirus resistance 2
gene29997:106568941	40.2485	1.65119	0.537263	0.00211674	0.0491028	106568941	LOC106568941	mitochondrial import inner membrane translocase subunit TIM44-like
gene36456:100306817	606.341	0.908521	0.295546	0.00211176	0.0491028	100306817	ola1	Obg-like ATPase 1
gene36729:106575647	162.072	-0.845922	0.275255	0.00211751	0.0491028	106575647	LOC106575647	filamin A-interacting protein 1-like
gene38298:106577204	136.89	0.91914	0.299261	0.00213085	0.0491028	106577204	LOC106577204	ribosomal protein 63, mitochondrial-like
gene42339:106581113	8141.94	0.652805	0.212373	0.00211308	0.0491028	106581113	LOC106581113	40S ribosomal protein S25-like
gene44750:106583358	377.134	-0.688292	0.224092	0.00213007	0.0491028	106583358	LOC106583358	isocitrate dehydrogenase [NAD] subunit beta, mitochondrial-like
gene50513:106588945	386.5	-0.717976	0.233736	0.00212812	0.0491028	106588945	LOC106588945	HEPACAM family member 2-like
gene7026:106600672	3461.39	-0.719551	0.234184	0.00212214	0.0491028	106600672	amdhd2	amidohydrolase domain containing 2
gene7662:100380772	282.543	0.973838	0.316658	0.00210249	0.0491028	100380772	LOC100380772	DNA (cytosine-5)-methyltransferase 1
gene796:106600929	11318.9	-0.613442	0.199569	0.00211329	0.0491028	106600929	sptbn5	spectrin beta, non-erythrocytic 5
gene9677:106603127	906.358	0.921158	0.29997	0.00213463	0.0491028	106603127	LOC106603127	stress-induced-phosphoprotein 1-like
gene1482:106609527	312.771	1.12341	0.365889	0.00213797	0.0491307	106609527	LOC106609527	mitochondrial import receptor subunit TOM22 homolog
gene1759:106612524	967.949	-1.78285	0.58074	0.00214082	0.0491471	106612524	LOC106612524	ribonuclease T2-like
gene70614:106595639	93.098	-1.05938	0.345112	0.00214294	0.0491471	106595639	LOC106595639	E3 ubiquitin-protein ligase TRIM39-like
gene10114:106603419	163.583	-0.683812	0.222856	0.00215205	0.0493071	106603419	LOC106603419	homeobox protein cut-like 1
gene37973:106576731	60.2171	1.42451	0.464343	0.00215648	0.0493108	106576731	dnph1	2'-deoxynucleoside 5'-phosphate N-hydrolase 1
gene40616:106579504	64.9995	1.24042	0.404328	0.00215598	0.0493108	106579504	pdx1	pancreatic and duodenal homeobox 1
gene26451:106565535	435.943	0.750331	0.244652	0.00216268	0.0494037	106565535	LOC106565535	peptidyl-prolyl cis-trans isomerase FKBP11-like
gene14420:106607650	285.616	-0.597565	0.19506	0.00218767	0.0495563	106607650	LOC106607650	protein sel-1 homolog 1-like
gene25274:106564424	8369.76	0.558404	0.182302	0.00219074	0.0495563	106564424	LOC106564424	galectin-2-like
gene25637:106564944	262.111	-0.571645	0.186654	0.00219431	0.0495563	106564944	LOC106564944	secernin-2-like
gene3099:106572199	419.677	0.657135	0.214352	0.00217171	0.0495563	106572199	LOC106572199	thioredoxin-like protein 1
gene330:106571589	216.277	0.679881	0.221877	0.00218232	0.0495563	106571589	LOC106571589	uncharacterized LOC106571589
gene35043:106573904	235.287	0.819304	0.267523	0.00219453	0.0495563	106573904	LOC106573904	mpv17-like protein 2
gene44922:106583719	159.401	1.0713	0.349517	0.00217613	0.0495563	106583719	LOC106583719	DNA replication licensing factor mcm2
gene45456:106584108	1086.6	-0.642491	0.209743	0.00218964	0.0495563	106584108	LOC106584108	uncharacterized LOC106584108
gene51925:106590354	855.767	-1.10496	0.360807	0.00219511	0.0495563	106590354	LOC106590354	E3 ubiquitin/ISG15 ligase TRIM25-like
gene52592:106590819	113.187	0.977108	0.318773	0.00217512	0.0495563	106590819	LOC106590819	enhancer of rudimentary homolog
gene61382:100136465	121.945	0.879978	0.287263	0.00218896	0.0495563	100136465	pkz	protein kinase containing Z-DNA binding domains
gene7357:100195101	1343.74	0.951414	0.310603	0.00219042	0.0495563	100195101	phb	prohibitin
gene31827:106570699	65.2287	1.05382	0.344193	0.00220074	0.0496349	106570699	LOC106570699	transcription factor E2F3-like
gene11513:106604850	163.508	1.12274	0.366853	0.00220988	0.0497924	106604850	LOC106604850	proteoglycan 4-like
gene201:106610881	50.2459	1.2558	0.410625	0.00222617	0.0499177	106610881	pole2	DNA polymerase epsilon 2, accessory subunit
gene24267:106563517	3144.34	0.757691	0.247752	0.00222625	0.0499177	106563517	LOC106563517	60S acidic ribosomal protein P2-like
gene41205:106580001	1491.71	1.10867	0.36251	0.00222591	0.0499177	106580001	LOC106580001	tubulin beta-1 chain
gene44545:106583574	3852.8	0.694056	0.226876	0.00221943	0.0499177	106583574	LOC106583574	60S acidic ribosomal protein P0-like
gene8767:106602333	102.969	1.7904	0.585276	0.00222022	0.0499177	106602333	LOC106602333	hemogen-like
gene9231:106602804	4287.63	0.596841	0.195243	0.00223635	0.0500956	106602804	LOC106602804	40S ribosomal protein S6
gene16104:106609216	216.969	0.919102	0.300815	0.00224777	0.0503025	106609216	LOC106609216	single-stranded DNA-binding protein, mitochondrial-like
gene13339:100380791	175.439	-2.28317	0.747458	0.00225373	0.0503872	100380791	aqp8	aquaporin 8
gene34977:100196438	314.403	0.787225	0.257933	0.00227286	0.0507166	100196438	tba1a	Tubulin alpha-1A chain
gene40377:106579155	60.4769	1.10639	0.36248	0.00227116	0.0507166	106579155	brca1	BRCA1, DNA repair associated
gene1363:100194654	5088.91	0.556662	0.182478	0.00228407	0.0509176	100194654	LOC100194654	ribosomal protein S27-3
gene44308:106583072	2025.32	-0.528899	0.173395	0.0022865	0.0509226	106583072	LOC106583072	epidermal growth factor receptor kinase substrate 8-like protein 3
gene10726:106604138	44.4051	1.03835	0.340564	0.00229663	0.0510498	106604138	LOC106604138	THO complex subunit 3-like
gene21978:106561150	231.627	-0.858294	0.281492	0.00229534	0.0510498	106561150	LOC106561150	nuclear receptor ROR-alpha
gene16362:106609405	318.828	0.938246	0.30779	0.00230112	0.0511003	106609405	LOC106609405	protein LLP homolog
gene13951:106607161	109.95	-0.865169	0.283964	0.00231328	0.0512244	106607161	LOC106607161	protein Tob2-like
gene15964:106609052	107.977	-0.88493	0.290451	0.00231336	0.0512244	106609052	LOC106609052	diacylglycerol kinase delta-like
gene24797:106563937	197.055	0.758351	0.248859	0.00230896	0.0512244	106563937	ddx52	DExD-box helicase 52
gene12281:106605620	51.6381	1.35842	0.446071	0.00232443	0.0512729	106605620	LOC106605620	uncharacterized LOC106605620
gene36918:106575825	338.412	-2.00903	0.659565	0.00231915	0.0512729	106575825	LOC106575825	DNA-binding protein SATB2-like
gene38121:106577002	96.7222	0.906528	0.297646	0.00232169	0.0512729	106577002	LOC106577002	cGMP-dependent protein kinase 1-like
gene50077:100195402	1726.56	-1.23118	0.404255	0.00232249	0.0512729	100195402	txnip	thioredoxin interacting protein
gene28890:106567995	864.754	-0.576487	0.189366	0.00233221	0.0513955	106567995	galnt10	polypeptide N-acetylgalactosaminyltransferase 10
gene7543:106601172	423.271	-1.32131	0.434256	0.0023447	0.0516215	106601172	LOC106601172	protein NLRC3-like
gene48371:106587137	220.829	1.30955	0.430434	0.00234712	0.0516254	106587137	LOC106587137	G1/S-specific cyclin-D1
gene39269:106578167	835.512	0.625921	0.205782	0.00235268	0.0516984	106578167	LOC106578167	acidic leucine-rich nuclear phosphoprotein 32 family member B-like
gene896:106603894	414.909	-1.06249	0.349359	0.00235588	0.0517196	106603894	LOC106603894	ribonuclease inhibitor-like
gene38742:106577622	315.837	-1.04704	0.344318	0.00235868	0.0517318	106577622	LOC106577622	inactive ubiquitin carboxyl-terminal hydrolase 53-like
gene45387:106584171	342.851	-0.811096	0.266777	0.00236297	0.0517769	106584171	LOC106584171	gelsolin-like
gene19565:106612698	66.1775	1.08166	0.355896	0.00237153	0.051866	106612698	LOC106612698	DNA-directed RNA polymerase I subunit RPA34-like
gene24083:100196613	2659.66	1.14415	0.37642	0.00236935	0.051866	100196613	grp78	78 kDa glucose-regulated protein
gene38725:106577608	42.7714	-1.18527	0.390104	0.0023788	0.0519758	106577608	LOC106577608	coiled-coil domain-containing protein 149-like
gene33136:100196749	109.281	1.01066	0.332774	0.00238894	0.0520987	100196749	if2b	Eukaryotic translation initiation factor 2 subunit 2
gene51491:106589937	227.388	0.789373	0.259904	0.00238811	0.0520987	106589937	LOC106589937	uncharacterized LOC106589937
gene51141:106589607	351.364	1.31682	0.433731	0.00239725	0.0522307	106589607	LOC106589607	NHP2-like protein 1
gene33089:106571922	497.546	0.618286	0.203684	0.00240127	0.052269	106571922	LOC106571922	proteasome subunit alpha type-7-like
gene15585:106608611	617.621	-0.943807	0.311104	0.0024155	0.0524797	106608611	LOC106608611	inactive ubiquitin carboxyl-terminal hydrolase 53-like
gene24927:106564061	220.52	-1.87557	0.618189	0.00241355	0.0524797	106564061	LOC106564061	ADP-ribosylation factor-binding protein GGA2-like
gene11423:106604765	1523.63	0.842256	0.277854	0.00243508	0.0525074	106604765	LOC106604765	tubulin beta-4B chain-like
gene22677:106561841	54.6501	1.15049	0.379534	0.00243489	0.0525074	106561841	kif23	kinesin family member 23
gene29726:100380408	111.224	-0.695888	0.22942	0.00241937	0.0525074	100380408	tmem71	transmembrane protein 71
gene3077:106572010	75.6152	-0.929216	0.306531	0.00243425	0.0525074	106572010	ralgps1	Ral GEF with PH domain and SH3 binding motif 1
gene36183:106575112	326.491	0.663558	0.218819	0.0024257	0.0525074	106575112	LOC106575112	ATP synthase-coupling factor 6, mitochondrial-like
gene38247:106577105	80.4003	-0.778393	0.256678	0.00242485	0.0525074	106577105	anapc1	anaphase promoting complex subunit 1
gene41430:106580352	82.5391	1.27349	0.420135	0.00243633	0.0525074	106580352	LOC106580352	bifunctional methylenetetrahydrofolate dehydrogenase/cyclohydrolase, mitochondrial-like
gene42323:106581131	72.7618	0.994967	0.328261	0.00243724	0.0525074	106581131	tubd1	tubulin delta 1
gene51759:106590207	125.861	0.954731	0.31495	0.00243442	0.0525074	106590207	cssa29h8orf59	chromosome ssa29 open reading frame, human C8orf59
gene19102:106612087	253.794	0.58803	0.194114	0.00245119	0.052546	106612087	LOC106612087	UBX domain-containing protein 1-like
gene31337:106570212	777.406	-0.773044	0.255193	0.00245155	0.052546	106570212	LOC106570212	alpha-N-acetylgalactosaminide alpha-2,6-sialyltransferase 1-like
gene41445:106580336	7788.23	-1.68722	0.556848	0.002446	0.052546	106580336	LOC106580336	transcobalamin-2-like
gene41765:106580614	60.4847	1.28784	0.425153	0.00245268	0.052546	106580614	znf367	zinc finger protein 367
gene43797:106582650	485.003	-0.761612	0.251404	0.00245015	0.052546	106582650	LOC106582650	syndecan-4-like
gene49707:106588243	520.856	1.11318	0.367338	0.00244231	0.052546	106588243	LOC106588243	mitochondrial import receptor subunit TOM40 homolog
gene4391:106584165	88.8901	1.06547	0.351897	0.00246342	0.0527273	106584165	LOC106584165	RRP15-like protein
gene14080:100136373	3165.33	0.608973	0.201165	0.0024681	0.0527785	100136373	rs11	40S ribosomal protein S11
gene24285:106563506	91.5424	0.871424	0.287925	0.00247346	0.052809	106563506	tmem223	transmembrane protein 223
gene49673:106588218	413.906	0.776357	0.25652	0.0024741	0.052809	106588218	LOC106588218	casein kinase II subunit beta
gene37667:106576578	717.341	3.51444	1.16176	0.00248549	0.053003	106576578	LOC106576578	chymotrypsin B-like
gene18292:106611350	30.0607	1.19782	0.396014	0.0024888	0.0530248	106611350	LOC106611350	centromere protein O-like
gene34402:106573174	476.79	-0.795918	0.263239	0.00249821	0.0531763	106573174	LOC106573174	protein-methionine sulfoxide oxidase mical3a-like
gene31323:106570200	1593.2	-1.172	0.387722	0.0025047	0.0532652	106570200	LOC106570200	thioredoxin-interacting protein-like
gene17084:100196870	86.8541	1.12528	0.372344	0.0025099	0.0532778	100196870	xtp3a	XTP3-transactivated gene A protein homolog
gene44877:106583684	142.486	-0.765091	0.253146	0.00250839	0.0532778	106583684	LOC106583684	N-acetyltransferase 8-like
gene15362:106608508	33030.6	-1.13282	0.374923	0.00251542	0.0533458	106608508	LOC106608508	fatty acid-binding protein, intestinal-like
gene35527:106574420	693.464	-0.553384	0.183178	0.00251925	0.053378	106574420	LOC106574420	NEDD4 family-interacting protein 2-like
gene7540:106601167	229.504	0.783734	0.259493	0.00252568	0.0534652	106601167	LOC106601167	uncharacterized LOC106601167
gene51132:106589585	117.503	1.05293	0.348731	0.00253343	0.0535802	106589585	dlgap5	DLG associated protein 5
gene42472:106581329	124.94	-0.864958	0.286539	0.00253912	0.0536513	106581329	LOC106581329	von Willebrand factor A domain-containing protein 5A-like
gene22195:106561431	72.3548	-1.2434	0.412141	0.00255344	0.0538947	106561431	LOC106561431	uncharacterized LOC106561431
gene26224:106565357	486.453	0.747052	0.247697	0.00256138	0.0538947	106565357	LOC106565357	mitochondrial import receptor subunit TOM6 homolog
gene30245:100195069	124.098	0.945223	0.313443	0.00256464	0.0538947	100195069	toe1	target of EGR1, member 1 (nuclear)
gene37086:106575989	85.8818	0.925373	0.306796	0.00255924	0.0538947	106575989	trmu	tRNA 5-methylaminomethyl-2-thiouridylate methyltransferase
gene41674:106580593	196.214	0.788153	0.261341	0.00256296	0.0538947	106580593	LOC106580593	small integral membrane protein 15-like
gene50290:106588694	513.7	1.06309	0.352435	0.00255782	0.0538947	106588694	LOC106588694	tRNA (cytosine(34)-C(5))-methyltransferase-like
gene33414:106572059	103.932	0.867241	0.287693	0.00257429	0.0540483	106572059	srm	spermidine synthase
gene16163:106609324	489.951	0.971689	0.322544	0.00259039	0.0541402	106609324	LOC106609324	sorting and assembly machinery component 50 homolog B-like
gene26545:106565628	296.02	-0.873834	0.290015	0.00258624	0.0541402	106565628	LOC106565628	major facilitator superfamily domain-containing protein 4-A-like
gene37496:106576438	387.628	-1.76682	0.586445	0.00258886	0.0541402	106576438	LOC106576438	normal mucosa of esophagus-specific gene 1 protein-like
gene3883:106579246	61.4593	0.998207	0.331329	0.00258905	0.0541402	106579246	LOC106579246	tRNA (guanine(10)-N2)-methyltransferase homolog
gene6179:106598980	1593.4	0.731944	0.242892	0.00258297	0.0541402	106598980	LOC106598980	40S ribosomal protein S28
gene53954:106593234	34.1288	-1.13256	0.375987	0.00259341	0.0541545	106593234	LOC106593234	uncharacterized LOC106593234
gene39305:106578205	120.943	-1.01765	0.337893	0.00259745	0.0541898	106578205	LOC106578205	SH3 domain-containing protein 19-like
gene10306:106603751	327.503	1.15476	0.383518	0.00260418	0.0542322	106603751	LOC106603751	uncharacterized LOC106603751
gene506:106589732	191.46	0.775736	0.257627	0.0026032	0.0542322	106589732	LOC106589732	rRNA-processing protein FCF1 homolog
gene10131:106603455	69.5987	1.18322	0.393186	0.00261846	0.0544531	106603455	lrwd1	leucine rich repeats and WD repeat domain containing 1
gene18550:106611558	990.422	0.77848	0.258701	0.0026195	0.0544531	106611558	LOC106611558	peptidyl-prolyl cis-trans isomerase D-like
gene22766:106561922	119.484	1.10831	0.368415	0.00262699	0.0545596	106561922	LOC106561922	transcription factor E2F8-like
gene40831:106579720	35.3691	-1.22494	0.407277	0.00263283	0.0546319	106579720	LOC106579720	nuclear receptor coactivator 2-like
gene40619:106579508	3855.02	0.561465	0.186719	0.00263842	0.0546987	106579508	rpl21	ribosomal protein L21
gene57814:106594473	169.2	-0.657016	0.218519	0.00264116	0.0547063	106594473	LOC106594473	probable global transcription activator SNF2L2
gene3305:106573734	31.2982	-1.10311	0.367019	0.00265074	0.0548555	106573734	LOC106573734	potassium/sodium hyperpolarization-activated cyclic nucleotide-gated channel 2-like
gene45301:106584057	382.096	0.852702	0.283793	0.00265877	0.0548743	106584057	LOC106584057	protein mago nashi homolog
gene6603:106600433	405.896	0.618198	0.205735	0.00265732	0.0548743	106600433	LOC106600433	THO complex subunit 1-like
gene9086:106602664	248.9	0.727684	0.242151	0.00265509	0.0548743	106602664	LOC106602664	T-cell ecto-ADP-ribosyltransferase 2-like
gene45748:106584472	185.021	0.643352	0.214169	0.00266497	0.0549532	106584472	LOC106584472	pseudouridylate synthase 7 homolog
gene692:106600514	3033.35	-2.97313	0.989971	0.00267117	0.0550318	106600514	LOC106600514	glutamyl aminopeptidase-like
gene39154:100195267	255.978	0.890941	0.296728	0.00267725	0.0551079	100195267	ccnb3	cyclin B3
gene10026:106603543	106.746	0.846121	0.281873	0.00268408	0.0551502	106603543	LOC106603543	cytoskeleton-associated protein 2-like
gene48116:106586873	40.6773	-0.985759	0.328377	0.00268289	0.0551502	106586873	LOC106586873	interferon alpha/beta receptor 1a
gene28646:100196498	112.051	0.864493	0.288072	0.00269126	0.0552485	100196498	tmem126a	transmembrane protein 126A
gene21253:106560435	172.249	1.0097	0.336618	0.00270383	0.0554574	106560435	LOC106560435	nuclear autoantigenic sperm protein-like
gene37491:106576410	67.5338	1.5777	0.52608	0.00270892	0.0555125	106576410	LOC106576410	uncharacterized LOC106576410
gene35818:106574730	48.4055	1.12517	0.375239	0.00271272	0.055541	106574730	donson	downstream neighbor of SON
gene51115:106589571	194.02	0.903592	0.301378	0.0027158	0.0555548	106589571	LOC106589571	ATP synthase mitochondrial F1 complex assembly factor 2-like
gene42611:106581464	173.597	-0.783503	0.261386	0.00272208	0.0555848	106581464	LOC106581464	rho guanine nucleotide exchange factor 26-like
gene47901:106586653	15948.1	-0.790003	0.26354	0.00272061	0.0555848	106586653	LOC106586653	Na(+)/H(+) exchange regulatory cofactor NHE-RF3-like
gene7781:106601405	83.883	-0.808884	0.269923	0.00272905	0.0556779	106601405	LOC106601405	alpha-1,6-mannosylglycoprotein 6-beta-N-acetylglucosaminyltransferase B-like
gene28900:106567987	496.532	0.829536	0.276894	0.00273673	0.0556871	106567987	emc6	ER membrane protein complex subunit 6
gene46701:106585496	83.4526	1.10242	0.367969	0.00273576	0.0556871	106585496	LOC106585496	malectin-like
gene47601:106586369	1996.58	0.87945	0.293549	0.00273615	0.0556871	106586369	LOC106586369	60 kDa heat shock protein, mitochondrial
gene49862:106588387	4536.72	0.564538	0.188466	0.00274052	0.0557151	106588387	LOC106588387	40S ribosomal protein S18
gene14196:100194881	212.655	0.823045	0.274878	0.00275148	0.0558558	100194881	utp18	UTP18 small subunit (SSU) processome component homolog (yeast)
gene36449:100306757	427.04	0.957349	0.319742	0.00275228	0.0558558	100306757	smo3b	Small ubiquitin-related modifier 3-A
gene24185:106563197	241.84	1.21509	0.405925	0.00275898	0.0559425	106563197	fam136a	family with sequence similarity 136 member A
gene36571:106575478	122.726	1.03914	0.347214	0.0027643	0.0559522	106575478	LOC106575478	mitotic checkpoint protein BUB3
gene39912:106578809	273.269	1.02846	0.343619	0.00276228	0.0559522	106578809	LOC106578809	nucleolar and coiled-body phosphoprotein 1-like
gene20611:106613599	319.332	0.862291	0.288193	0.00277098	0.0559757	106613599	LOC106613599	thimet oligopeptidase-like
gene43919:106582752	145.589	-1.29574	0.433071	0.0027718	0.0559757	106582752	LOC106582752	sodium-coupled neutral amino acid transporter 3-like
gene5653:106596048	5618.52	0.688316	0.230062	0.00277273	0.0559757	106596048	LOC106596048	putative 60S ribosomal protein L37a
gene1435:106609079	333.366	-1.17925	0.394188	0.00277527	0.055978	106609079	LOC106609079	C-Jun-amino-terminal kinase-interacting protein 4-like
gene2785:106568849	112.433	0.928257	0.310391	0.00278423	0.0560608	106568849	LOC106568849	28S ribosomal protein S2, mitochondrial-like
gene34389:106573186	148.609	1.178	0.393883	0.00278307	0.0560608	106573186	LOC106573186	acylglycerol kinase, mitochondrial-like
gene1970:106560625	72.2641	-0.978236	0.327194	0.00279184	0.0561652	106560625	pdcl	phosducin like
gene19976:106613022	42.3626	-1.23143	0.412043	0.00280261	0.0561749	106613022	LOC106613022	rho GTPase-activating protein 32-like
gene21492:106560679	1660	0.496896	0.166275	0.00280449	0.0561749	106560679	LOC106560679	ATP synthase subunit g, mitochondrial-like
gene23766:106562921	1041.4	0.481051	0.160972	0.00280435	0.0561749	106562921	LOC106562921	60S ribosomal protein L37-like
gene45879:106584610	66.4927	0.933506	0.312328	0.00280018	0.0561749	106584610	LOC106584610	wee1-like protein kinase 1-A
gene5966:106597294	2270.72	0.494854	0.165581	0.00280264	0.0561749	106597294	LOC106597294	collagen alpha-1(VI) chain-like
gene67866:106596978	82.7498	-1.05689	0.353813	0.0028159	0.0563546	106596978	LOC106596978	protein NLRC3-like
gene11122:106604456	302.052	1.05028	0.35175	0.00282762	0.056492	106604456	timm8a	translocase of inner mitochondrial membrane 8A
gene5768:100380348	336.815	-0.538366	0.180304	0.00282766	0.056492	100380348	ubf1	Nucleolar transcription factor 1
gene13894:106607217	402.153	0.514276	0.172335	0.00284346	0.0565631	106607217	LOC106607217	hsp90 co-chaperone Cdc37-like
gene21074:106560259	765.789	-0.872124	0.292224	0.00284105	0.0565631	106560259	LOC106560259	uncharacterized LOC106560259
gene42138:106581014	150.531	-1.00161	0.335619	0.00284162	0.0565631	106581014	LOC106581014	calpain-5-like
gene47590:106586346	572.127	1.12042	0.375371	0.00283735	0.0565631	106586346	LOC106586346	dnaJ homolog subfamily B member 11-like
gene50981:106589464	205.9	0.988109	0.331093	0.00284151	0.0565631	106589464	cssa28h17orf62	chromosome ssa28 open reading frame, human C17orf62
gene14749:106607938	268.339	-0.70211	0.235365	0.0028537	0.0566508	106607938	LOC106607938	nuclear receptor coactivator 7-like
gene27207:106566160	85.4192	4.07715	1.36684	0.00285523	0.0566508	106566160	LOC106566160	elastase-1-like
gene51468:106589913	49.9448	1.09793	0.368055	0.00285377	0.0566508	106589913	mgme1	mitochondrial genome maintenance exonuclease 1
gene19160:100195605	73.6007	1.0612	0.355897	0.00286591	0.0568102	100195605	thg1	Probable tRNAHis guanylyltransferase
gene38851:106577766	700.416	1.72492	0.578537	0.00286818	0.0568102	106577766	LOC106577766	interferon-induced very large GTPase 1-like
gene12819:106606163	101.856	0.897386	0.301071	0.00287637	0.0568262	106606163	LOC106606163	39S ribosomal protein L13, mitochondrial-like
gene22811:106561966	510.602	0.636126	0.213416	0.00287603	0.0568262	106561966	LOC106561966	26S protease regulatory subunit 6A-B-like
gene3818:106578539	676.316	0.958751	0.321607	0.00287193	0.0568262	106578539	LOC106578539	rRNA 2'-O-methyltransferase fibrillarin-like
gene16281:106609458	165.737	1.19712	0.401877	0.00289367	0.0569745	106609458	LOC106609458	ubl carboxyl-terminal hydrolase 18-like
gene21092:106560275	625.82	-0.680415	0.228419	0.00289375	0.0569745	106560275	LOC106560275	exocyst complex component 1-like
gene2130:106562041	68.4942	1.10551	0.371055	0.00288833	0.0569745	106562041	LOC106562041	guanine nucleotide-binding protein subunit alpha-14-like
gene23000:100380865	1031.63	0.809628	0.271758	0.00288976	0.0569745	100380865	LOC100380865	lysine--tRNA ligase
gene79669:106592229	103.757	0.850698	0.285749	0.00291003	0.0572463	106592229	chordc1	cysteine and histidine rich domain containing 1
gene11651:106605016	1178.16	-0.982654	0.330125	0.00291449	0.0572723	106605016	LOC106605016	alpha-N-acetylgalactosaminidase-like
gene39541:100380554	1112.89	0.782201	0.262822	0.00291879	0.0572723	100380554	tcpe	T-complex protein 1 subunit epsilon
gene872:106602554	771.67	-0.59935	0.20138	0.00291836	0.0572723	106602554	LOC106602554	alpha-(1,6)-fucosyltransferase-like
gene19720:106612565	117.252	0.78595	0.264152	0.00292638	0.0572758	106612565	LOC106612565	39S ribosomal protein L44, mitochondrial-like
gene26488:100195781	311.174	1.06367	0.35756	0.00293167	0.0572758	100195781	pfdn5	prefoldin subunit 5
gene28736:106567640	29.3228	1.70437	0.573071	0.00293848	0.0572758	106567640	LOC106567640	histone H2A
gene31280:106569867	432.258	-0.549901	0.184799	0.00292356	0.0572758	106569867	LOC106569867	myocyte-specific enhancer factor 2D homolog
gene3710:100137023	1289.74	3.65388	1.2281	0.00292759	0.0572758	100137023	trp-ii	trypsin II
gene38162:100380861	157.694	-0.634985	0.213495	0.00293718	0.0572758	100380861	LOC100380861	ubiquitin thioesterase Zranb1
gene38260:106577159	144.879	-0.678796	0.228238	0.00293881	0.0572758	106577159	LOC106577159	uncharacterized LOC106577159
gene4765:106587111	362.904	-0.744535	0.250313	0.00293547	0.0572758	106587111	LOC106587111	growth factor receptor-bound protein 2-like
gene47370:106586140	622.674	-1.74213	0.585916	0.00294583	0.0573286	106586140	LOC106586140	solute carrier family 40 member 1-like
gene49589:100380534	249.413	-1.2972	0.436289	0.00294649	0.0573286	100380534	bat1	HLA-B associated transcript 1
gene19270:106612256	81.3545	-0.921801	0.310221	0.0029641	0.0573332	106612256	LOC106612256	proton-coupled amino acid transporter 1-like
gene21030:106613973	74.8953	0.855063	0.287721	0.00296017	0.0573332	106613973	LOC106613973	methyltransferase-like protein 13
gene2475:100194632	1284.67	0.572973	0.192796	0.00295952	0.0573332	100194632	LOC100194632	endothelial differentiation-related factor 1-1
gene2956:106570305	129.051	0.963159	0.324076	0.00295848	0.0573332	106570305	ntmt1	N-terminal Xaa-Pro-Lys N-methyltransferase 1
gene35704:106574616	209.309	0.606399	0.204072	0.00296361	0.0573332	106574616	LOC106574616	28S ribosomal protein S9, mitochondrial-like
gene6201:106599036	47.4729	1.4205	0.477849	0.00295187	0.0573332	106599036	LOC106599036	mitochondrial import inner membrane translocase subunit TIM44-like
gene74321:100380299	119.488	0.934357	0.314376	0.00295774	0.0573332	100380299	actn1	actinin alpha 1
gene40256:106579258	96.4767	0.991958	0.333968	0.00297585	0.0574874	106579258	tut1	terminal uridylyl transferase 1, U6 snRNA-specific
gene49603:106588160	516.685	0.690918	0.232625	0.00297705	0.0574874	106588160	LOC106588160	26S proteasome non-ATPase regulatory subunit 4-like
gene1397:106608423	4389.46	0.632941	0.213175	0.00298652	0.0576221	106608423	LOC106608423	40S ribosomal protein S24
gene48308:106587076	69.2924	0.90941	0.306384	0.00299549	0.057747	106587076	LOC106587076	transcription factor E2F8-like
gene44138:106583025	594.061	0.617874	0.20823	0.00300463	0.0578748	106583025	LOC106583025	26S proteasome non-ATPase regulatory subunit 6
gene10545:106603986	421.736	-4.34269	1.46374	0.00300882	0.057876	106603986	LOC106603986	uncharacterized LOC106603986
gene33536:106572421	55.698	-2.6105	0.879919	0.0030097	0.057876	106572421	LOC106572421	synaptotagmin-2-like
gene4284:106583175	168.298	0.820666	0.27667	0.0030148	0.0579064	106583175	LOC106583175	28S ribosomal protein S15, mitochondrial-like
gene52137:100196139	135.983	0.883062	0.297721	0.0030163	0.0579064	100196139	ndub4	NADH dehydrogenase 1 beta subcomplex subunit 4
gene32056:106570917	68.7147	-0.86814	0.292746	0.00302179	0.0579637	106570917	wdfy3	WD repeat and FYVE domain containing 3
gene44582:100196052	72.0854	-1.41124	0.47598	0.00302759	0.0580267	100196052	fkbp5	FK506 binding protein 5
gene11306:106604666	452.664	0.796458	0.268877	0.00305482	0.058127	106604666	LOC106604666	FACT complex subunit SSRP1-like
gene21423:106560616	26.5204	-1.54989	0.523241	0.00305547	0.058127	106560616	LOC106560616	solute carrier organic anion transporter family member 2A1-like
gene23657:106562814	185.604	0.672901	0.227093	0.00304554	0.058127	106562814	LOC106562814	RNA-binding protein NOB1-like
gene29032:106567863	638.833	0.899572	0.303512	0.00303788	0.058127	106567863	LOC106567863	ribonucleoside-diphosphate reductase large subunit
gene42983:100380481	986.037	0.785474	0.265131	0.00305068	0.058127	100380481	lab	Lupus La protein homolog B
gene4300:106583294	221.595	0.803049	0.270964	0.00303994	0.058127	106583294	rpa2	replication protein A2
gene6290:106599585	37.6474	-0.991114	0.334522	0.00304874	0.058127	106599585	LOC106599585	chromodomain-helicase-DNA-binding protein 7-like
gene9567:106603038	105.746	0.963188	0.325133	0.00305212	0.058127	106603038	LOC106603038	kinesin-like protein KIF20A
gene9601:106603066	562.327	0.819304	0.276549	0.00305051	0.058127	106603066	LOC106603066	eukaryotic translation initiation factor 1A, X-chromosomal-like
gene1022:106604331	75.9882	0.997575	0.336817	0.00305878	0.058142	106604331	mettl18	methyltransferase like 18
gene32750:106571686	352.131	0.703972	0.237787	0.00307131	0.0582842	106571686	LOC106571686	activator of 90 kDa heat shock protein ATPase homolog 1-like
gene3975:106580016	227.689	0.702803	0.237376	0.00306922	0.0582842	106580016	LOC106580016	probable assembly chaperone of rpl4
gene31492:106570361	243.934	-0.584169	0.197339	0.00307416	0.0582904	106570361	LOC106570361	zinc finger protein 40-like
gene25908:106565058	904.14	0.799678	0.27019	0.0030795	0.0583361	106565058	LOC106565058	eukaryotic translation initiation factor 2 subunit 2-like
gene47304:106586054	240.467	-0.744115	0.251435	0.00308162	0.0583361	106586054	LOC106586054	interferon regulatory factor 2-like
gene25756:106564836	157.476	0.921224	0.311453	0.00309819	0.0585684	106564836	LOC106564836	ESF1 homolog
gene41481:106580305	1631.29	-0.918854	0.310685	0.00310137	0.0585684	106580305	plbd2	phospholipase B domain containing 2
gene48244:106587026	124.856	-0.838203	0.283417	0.0031015	0.0585684	106587026	zmiz2	zinc finger MIZ-type containing 2
gene1031:106604418	232.019	-0.762731	0.257987	0.00311182	0.0586903	106604418	hps6	HPS6, biogenesis of lysosomal organelles complex 2 subunit 3
gene50666:100196228	418.866	0.911288	0.308248	0.00311304	0.0586903	100196228	yars	tyrosyl-tRNA synthetase
gene3675:106577032	325.367	-0.534807	0.180918	0.00311587	0.0586958	106577032	LOC106577032	trichohyalin-like
gene2917:106570595	1579.5	0.942653	0.318967	0.00312333	0.0587405	106570595	LOC106570595	protein SET-like
gene40887:106579773	987.094	0.85151	0.288114	0.00312199	0.0587405	106579773	gars	glycyl-tRNA synthetase
gene40719:100136506	90.8918	-1.11737	0.37814	0.00312767	0.0587743	100136506	LOC100136506	activin receptor type-2B
gene46475:100380544	180.883	0.627678	0.212447	0.00313158	0.0587999	100380544	tfip11	tuftelin interacting protein 11
gene47121:106585874	158.634	0.778323	0.263497	0.00313868	0.0588853	106585874	mrpl1	mitochondrial ribosomal protein L1
gene16087:106609229	95.4454	0.866509	0.29345	0.00314877	0.0590266	106609229	LOC106609229	transmembrane protein 209-like
gene18445:106611490	129.208	0.994366	0.336834	0.00315621	0.0591182	106611490	LOC106611490	cytochrome c oxidase assembly protein COX16 homolog, mitochondrial-like
gene17412:106610469	143.629	1.1411	0.386655	0.00316528	0.0592226	106610469	timm10	translocase of inner mitochondrial membrane 10
gene32069:106570930	189.52	-0.687316	0.232913	0.00316788	0.0592226	106570930	LOC106570930	poly [ADP-ribose] polymerase 8-like
gene43086:106581931	917.275	-0.494572	0.167606	0.00316948	0.0592226	106581931	LOC106581931	kunitz-type serine protease inhibitor bitisilin-3-like
gene13831:100196350	292.181	0.758847	0.257272	0.00318194	0.0594073	100196350	ddx39	ATP-dependent RNA helicase DDX39
gene40260:100380718	1212.63	0.90956	0.308478	0.00319281	0.0595621	100380718	top2a	DNA topoisomerase II alpha
gene17619:106610677	3945.43	0.598601	0.203099	0.00320519	0.0597448	106610677	LOC106610677	60S ribosomal protein L13a-like
gene17849:106610844	138.721	1.04322	0.354049	0.00321345	0.0598504	106610844	LOC106610844	rho GTPase-activating protein 11A-like
gene14841:106608028	198.662	-0.804515	0.273271	0.00323978	0.0602923	106608028	LOC106608028	heme-binding protein 2-like
gene18977:106611957	80.2134	-0.868366	0.295035	0.00324776	0.0602951	106611957	LOC106611957	F-box only protein 38-like
gene41859:100196662	272.764	-1.55468	0.528198	0.00324668	0.0602951	100196662	LOC100196662	serine (or cysteine) proteinase inhibitor clade E, nexin, plasminogen activator inhibitor type 1-like
gene583:106597610	262.688	0.843213	0.286463	0.00324492	0.0602951	106597610	LOC106597610	39S ribosomal protein L35, mitochondrial-like
gene11527:106604840	185.231	0.711002	0.241662	0.00325954	0.0604006	106604840	LOC106604840	pre-mRNA-splicing factor RBM22-like
gene46711:106585487	894.091	0.86623	0.294433	0.00326075	0.0604006	106585487	LOC106585487	cytochrome c oxidase subunit 6A1, mitochondrial-like
gene831:106602210	269.088	0.878902	0.298746	0.00326129	0.0604006	106602210	timm9	translocase of inner mitochondrial membrane 9
gene44665:100194648	2228.27	0.573501	0.194962	0.00326509	0.0604225	100194648	rl10a	ribosomal protein L10a-2
gene23401:106562540	733.196	0.731871	0.248836	0.00326967	0.0604588	106562540	LOC106562540	myelin expression factor 2-like
gene25633:106564948	546.943	0.735013	0.250053	0.00328823	0.0606563	106564948	LOC106564948	proteasome subunit beta type-3-like
gene44395:106583177	258.506	1.10455	0.375756	0.0032869	0.0606563	106583177	LOC106583177	exportin-2-like
gene51256:100380841	4056.54	-0.98633	0.335514	0.00328474	0.0606563	100380841	slc3a1	solute carrier family 3 member 1
gene3544:106575920	714.1	1.03405	0.351886	0.00329709	0.0607712	106575920	ncapd2	non-SMC condensin I complex subunit D2
gene23067:106562237	294.191	0.851882	0.289977	0.00330597	0.0608386	106562237	LOC106562237	nestin-like
gene36919:106575826	27.7318	-2.3945	0.815079	0.00330602	0.0608386	106575826	LOC106575826	uncharacterized LOC106575826
gene24880:106564013	756.283	0.764566	0.260295	0.00331083	0.0608744	106564013	LOC106564013	eukaryotic translation initiation factor 3 subunit B-like
gene40459:106579096	403.835	0.559653	0.190548	0.00331323	0.0608744	106579096	LOC106579096	26S protease regulatory subunit 8
gene5584:106595434	104.261	-0.717398	0.244355	0.00332594	0.0610497	106595434	LOC106595434	UPF0472 protein C16orf72 homolog
gene8826:106602389	2271.26	0.826973	0.281696	0.00332806	0.0610497	106602389	LOC106602389	high mobility group protein B2-like
gene76299:106594784	47.3749	1.10566	0.376671	0.00333171	0.0610681	106594784	LOC106594784	structural maintenance of chromosomes protein 2-like
gene28677:100270810	76.3957	0.947622	0.322929	0.00334136	0.0611964	100270810	ncf1	neutrophil cytosolic factor 1
gene43308:100136409	8406.65	0.654376	0.223018	0.00334429	0.0612016	100136409	LOC100136409	acyl-CoA-binding protein
gene50550:106588962	35.6865	1.08918	0.371239	0.00334732	0.0612085	106588962	recql4	RecQ like helicase 4
gene15552:106608636	4128.48	-1.51258	0.515668	0.00335432	0.061288	106608636	LOC106608636	excitatory amino acid transporter 3-like
gene33235:106572212	267.932	0.663541	0.226301	0.00336664	0.0614645	106572212	LOC106572212	transcription initiation factor TFIID subunit 10-like
gene1607:100380404	699.959	-0.547695	0.186818	0.00337106	0.0614966	100380404	galt2	Polypeptide N-acetylgalactosaminyltransferase 2
gene14198:100196215	2440.22	1.13715	0.388053	0.00338527	0.0615157	100196215	ndka	Nucleoside diphosphate kinase A
gene15884:106609024	281.262	-1.34536	0.459128	0.00338692	0.0615157	106609024	LOC106609024	apolipoprotein L3-like
gene21392:100196301	380.2	0.808598	0.275959	0.00338809	0.0615157	100196301	ncbp2	nuclear cap binding protein subunit 2
gene2809:106569531	209.45	-0.533447	0.182042	0.00338574	0.0615157	106569531	LOC106569531	transportin-1-like
gene48331:106587101	626.201	0.788453	0.269055	0.00338467	0.0615157	106587101	ndufs3	NADH:ubiquinone oxidoreductase core subunit S3
gene60623:106594431	159.492	-1.40599	0.479664	0.00337656	0.0615157	106594431	LOC106594431	uncharacterized LOC106594431
gene18618:106611629	447.209	0.720627	0.246103	0.00340978	0.0615754	106611629	LOC106611629	signal recognition particle subunit SRP72-like
gene21256:100195555	31.2372	1.09565	0.374052	0.00339912	0.0615754	100195555	tmm69	Transmembrane protein 69
gene22199:100306850	592.779	-1.30261	0.444859	0.00341004	0.0615754	100306850	bhlh3	Class B basic helix-loop-helix protein 3
gene22787:106561942	216.593	0.652769	0.222917	0.00340811	0.0615754	106561942	LOC106561942	NADH dehydrogenase [ubiquinone] iron-sulfur protein 3, mitochondrial-like
gene27993:106566811	1559.17	0.505002	0.17246	0.00340898	0.0615754	106566811	LOC106566811	60S ribosomal protein L22-like
gene31199:106569946	4855.36	0.625745	0.213672	0.00340567	0.0615754	106569946	LOC106569946	40S ribosomal protein S18
gene44232:100195931	1959.79	0.66843	0.228173	0.00339524	0.0615754	100195931	psma5	proteasome subunit alpha 5
gene9822:100194650	1382.9	0.725588	0.247842	0.00341557	0.0616271	100194650	LOC100194650	ribosomal protein L36a-2
gene51565:106590008	124.571	1.11223	0.380025	0.00342563	0.0617602	106590008	LOC106590008	39S ribosomal protein L2, mitochondrial-like
gene36309:100380704	1422.63	-0.762299	0.260511	0.00343168	0.0617839	100380704	LOC100380704	lymphocyte antigen 75
gene59872:106596683	66.3719	1.02419	0.350016	0.00343229	0.0617839	106596683	LOC106596683	nectin-4-like
gene23405:106562547	59.5528	1.15135	0.39352	0.00343614	0.061805	106562547	LOC106562547	deoxyuridine 5'-triphosphate nucleotidohydrolase-like
gene9001:106602585	79.9041	1.32493	0.452925	0.00344143	0.061852	106602585	LOC106602585	pre-mRNA-processing factor 19-like
gene44663:106583480	188.029	-0.872772	0.29853	0.00346051	0.0621466	106583480	LOC106583480	differentially expressed in FDCP 6 homolog
gene46254:106585186	85.655	1.15827	0.396382	0.00347683	0.0623912	106585186	LOC106585186	zinc finger protein 367-like
gene20894:106613855	189.837	0.967196	0.331112	0.00348851	0.0625521	106613855	LOC106613855	deoxyhypusine hydroxylase-like
gene25727:106564863	15470.4	-0.866977	0.296945	0.00350415	0.0627539	106564863	LOC106564863	protocadherin Fat 4-like
gene49112:106587886	210.158	0.907496	0.310858	0.00350791	0.0627539	106587886	LOC106587886	26S proteasome non-ATPase regulatory subunit 13-like
gene49579:106588123	66.946	0.97804	0.335005	0.00350622	0.0627539	106588123	LOC106588123	60S ribosome subunit biogenesis protein NIP7 homolog
gene44777:106583587	74.3061	1.06974	0.366611	0.00352372	0.0629878	106583587	LOC106583587	rac GTPase-activating protein 1-like
gene57236:100380534	58.3165	-1.77346	0.607847	0.00352722	0.0630016	100380534	bat1	HLA-B associated transcript 1
gene54426:106594657	133.125	0.636465	0.218192	0.00353425	0.0630785	106594657	LOC106594657	propionyl-CoA carboxylase alpha chain, mitochondrial-like
gene6149:106598916	772.024	0.791408	0.271384	0.00354328	0.0631908	106598916	LOC106598916	60S ribosomal protein L5-like
gene12421:106605772	587.306	-0.543211	0.186353	0.00355741	0.0633296	106605772	LOC106605772	uncharacterized LOC106605772
gene28584:100306804	703.435	0.747821	0.256549	0.00355781	0.0633296	100306804	lars	leucyl-tRNA synthetase
gene8504:106602140	109.682	1.44222	0.494792	0.00355929	0.0633296	106602140	LOC106602140	mitochondrial import inner membrane translocase subunit Tim10-like
gene41858:106580706	62.9929	-1.83272	0.628882	0.00356539	0.0633406	106580706	LOC106580706	thymus-specific serine protease-like
gene7031:106600676	363.714	0.853128	0.29273	0.00356395	0.0633406	106600676	mrps34	mitochondrial ribosomal protein S34
gene33988:106572839	414.399	0.708864	0.243267	0.003569	0.0633559	106572839	LOC106572839	proline synthase co-transcribed bacterial homolog protein-like
gene15107:100380449	54.3941	1.15256	0.395624	0.00357659	0.0633932	100380449	stk35	serine/threonine kinase 35
gene42172:100194992	469.493	-0.904459	0.310444	0.00357467	0.0633932	100194992	ripl1	RILP-like protein 1
gene45694:100306729	93.543	0.917356	0.314919	0.00357982	0.0634017	100306729	rex1bd	required for excision 1-B domain containing
gene2608:100195720	64.1533	0.948212	0.325644	0.00359349	0.0635951	100195720	pus1	pseudouridylate synthase 1
gene15693:106608817	514.024	-0.717261	0.246354	0.00359694	0.0636075	106608817	gigyf1	GRB10 interacting GYF protein 1
gene56078:106591900	76.0608	-1.05563	0.362615	0.00360076	0.0636263	106591900	LOC106591900	HEPACAM family member 2-like
gene21408:106560597	322.951	1.02942	0.353728	0.00361207	0.0637773	106560597	lonp1	lon peptidase 1, mitochondrial
gene24475:106563621	136.35	0.858165	0.29495	0.00361974	0.0638639	106563621	LOC106563621	kinesin-like protein KIF20A
gene24264:106563520	41.4639	1.00224	0.344526	0.0036253	0.0639132	106563520	LOC106563520	kinesin-like protein KIF18A
gene33835:106572679	618.243	0.889569	0.305832	0.00362956	0.0639396	106572679	LOC106572679	proliferation-associated protein 2G4-like
gene49929:100196752	762.347	0.96318	0.331182	0.00363391	0.0639673	100196752	tcpg	T-complex protein 1 subunit gamma
gene48088:106586850	300.593	0.583603	0.200697	0.00363882	0.064005	106586850	LOC106586850	ice-structuring glycoprotein-like
gene18477:100194781	7936.65	-1.21259	0.417122	0.00364861	0.0641283	100194781	lamp2	lysosomal membrane glycoprotein 2
gene39430:100196219	541.041	0.57371	0.197402	0.00365732	0.0642325	100196219	prs8	26S protease regulatory subunit 8
gene51564:100196071	1078.58	-1.67203	0.575416	0.00366342	0.0642907	100196071	msmb	Beta-microseminoprotein
gene1:106607996	213.803	0.775735	0.26705	0.00367458	0.0643871	106607996	LOC106607996	histone-lysine N-methyltransferase NSD2-like
gene31431:106570296	155.557	0.927418	0.319319	0.00368006	0.0643871	106570296	LOC106570296	actin-binding protein anillin-like
gene44315:106583060	51.7429	-1.18309	0.407304	0.00367619	0.0643871	106583060	LOC106583060	integrin beta-7-like
gene59748:100380294	38.7822	1.06671	0.367271	0.00367924	0.0643871	100380294	cnd3	Condensin complex subunit 3
gene121:106603467	208.814	-0.76384	0.263107	0.00369419	0.0645854	106603467	LOC106603467	uncharacterized LOC106603467
gene23340:106562490	52.8371	-1.5314	0.52774	0.00371016	0.0648155	106562490	LOC106562490	putative protein TPRXL
gene35727:106574641	112.576	0.688956	0.23755	0.00372859	0.0650883	106574641	LOC106574641	ephrin-A4-like
gene18117:106611176	596.294	0.754564	0.260247	0.00373858	0.0652062	106611176	LOC106611176	proteasome subunit alpha type-6-like
gene49768:100136525	15867.3	0.558173	0.192526	0.00374099	0.0652062	100136525	LOC100136525	elongation factor 1 alpha
gene13936:106607176	86.8229	-0.931924	0.3215	0.00374748	0.06527	106607176	LOC106607176	histone deacetylase 5-like
gene1400:106608462	379.92	-0.741817	0.255996	0.00375823	0.065408	106608462	LOC106608462	eukaryotic translation initiation factor 4E-binding protein 2-like
gene26970:106566023	40.5811	1.7938	0.619155	0.00376532	0.0654276	106566023	LOC106566023	myosin-binding protein H-like
gene28238:106567116	1394.88	-0.51531	0.177908	0.00377352	0.0654276	106567116	LOC106567116	probable phospholipid-transporting ATPase IIA
gene35166:106574023	322.81	0.5623	0.194124	0.00377232	0.0654276	106574023	LOC106574023	transcription factor BTF3 homolog 4
gene40168:106579335	2446.79	-1.2894	0.445042	0.00376434	0.0654276	106579335	LOC106579335	transmembrane protein 106B-like
gene7434:106601127	3311.26	0.575749	0.19876	0.00377109	0.0654276	106601127	LOC106601127	40S ribosomal protein S11
gene23161:100194506	2797.55	0.593135	0.204885	0.00379208	0.0655034	100194506	rps13	ribosomal protein S13
gene26662:106565839	256.886	0.778293	0.268838	0.00379133	0.0655034	106565839	slc25a26	solute carrier family 25 member 26
gene27390:100195651	7466.68	0.583929	0.201681	0.00378794	0.0655034	100195651	rl10	60S ribosomal protein L10
gene51370:106589819	1912.32	-0.89531	0.309239	0.00378911	0.0655034	106589819	LOC106589819	ribonuclease T2-like
gene51691:106590143	1473.91	-0.696092	0.240408	0.00378601	0.0655034	106590143	LOC106590143	phosphatidate phosphatase LPIN2-like
gene14796:106607987	98.5507	1.58837	0.54903	0.00381513	0.0655272	106607987	LOC106607987	ankyrin repeat and SOCS box protein 2-like
gene19334:106612316	405.91	0.743224	0.256785	0.00379951	0.0655272	106612316	LOC106612316	non-histone chromosomal protein HMG-14A-like
gene25440:100195658	2074.73	0.592625	0.204806	0.00380864	0.0655272	100195658	rs15a	40S ribosomal protein S15a
gene43551:106582389	133.134	-0.667049	0.230577	0.00381642	0.0655272	106582389	LOC106582389	NEDD8-conjugating enzyme UBE2F-like
gene43912:106582744	572.289	0.573976	0.198419	0.00381899	0.0655272	106582744	LOC106582744	ras-related protein Rap-1A-like
gene49278:106588053	70.5904	-1.09892	0.379815	0.00381194	0.0655272	106588053	LOC106588053	proline-rich protein 36-like
gene49657:100196391	100.933	1.16773	0.403543	0.00380729	0.0655272	100196391	exosc7	exosome component 7
gene75136:106592982	53.6696	0.953156	0.329377	0.00380596	0.0655272	106592982	LOC106592982	poly(ADP-ribose) glycohydrolase-like
gene9546:106602980	42.9844	-2.43949	0.843152	0.00381219	0.0655272	106602980	LOC106602980	complement factor B-like
gene31305:106569851	227.083	-0.674044	0.23307	0.00382764	0.0656268	106569851	LOC106569851	A-kinase anchor protein 9-like
gene12026:106605376	69.7316	1.3357	0.461979	0.00383711	0.0657198	106605376	ccne2	cyclin E2
gene18702:100195127	349.829	0.962108	0.332884	0.00384975	0.0657198	100195127	naa15	N(alpha)-acetyltransferase 15, NatA auxiliary subunit
gene213:106612204	55.8031	1.27986	0.442778	0.00384594	0.0657198	106612204	LOC106612204	tryptophan--tRNA ligase, cytoplasmic-like
gene23076:106562244	245.745	-1.67099	0.578059	0.00384407	0.0657198	106562244	LOC106562244	putative sodium-coupled neutral amino acid transporter 7
gene28877:106568005	204.103	0.861584	0.298031	0.00384112	0.0657198	106568005	LOC106568005	nucleolar protein 16-like
gene34875:106573597	1802.28	0.671742	0.232422	0.00385013	0.0657198	106573597	LOC106573597	cold-inducible RNA-binding protein B-like
gene30417:106569346	104.483	-0.68502	0.237042	0.00385409	0.0657387	106569346	LOC106569346	autophagy-related protein 9A-like
gene63819:106591341	44.4034	1.35446	0.46877	0.00385986	0.0657886	106591341	LOC106591341	serine/threonine-protein kinase PLK1-like
gene18763:106611740	107.614	1.59859	0.553712	0.0038889	0.0662011	106611740	LOC106611740	PCTP-like protein
gene38560:106577457	2484	0.598485	0.207306	0.0038898	0.0662011	106577457	LOC106577457	60S ribosomal protein L34
gene53513:100380711	61.9248	0.976543	0.338346	0.00389894	0.0663078	100380711	LOC100380711	heat shock 70 kDa protein 14
gene33515:106572351	191.8	-0.601084	0.20837	0.00391795	0.0665821	106572351	LOC106572351	specifically androgen-regulated gene protein-like
gene17950:106611006	379.089	0.699778	0.242655	0.0039286	0.0666447	106611006	ddx24	DEAD-box helicase 24
gene32598:106571420	82.2199	0.717776	0.248908	0.00393029	0.0666447	106571420	adat2	adenosine deaminase, tRNA specific 2
gene79111:106593590	161.482	-0.567443	0.196751	0.00392571	0.0666447	106593590	LOC106593590	transmembrane 9 superfamily member 2-like
gene13863:106607104	580.351	1.57666	0.54701	0.00394741	0.0667189	106607104	LOC106607104	CD9 antigen-like
gene20632:100196107	55.7251	-1.04756	0.363356	0.00393905	0.0667189	100196107	arrd3	Arrestin domain-containing protein 3
gene23399:106562537	2499.94	-0.648114	0.224834	0.00394359	0.0667189	106562537	LOC106562537	E3 ubiquitin-protein ligase RNF128 pseudogene
gene24342:106563451	65.2623	-0.796616	0.276434	0.00395459	0.0667189	106563451	LOC106563451	signal-induced proliferation-associated protein 1-like
gene25647:106564935	1250.72	2.98532	1.03595	0.00395489	0.0667189	106564935	LOC106564935	uncharacterized LOC106564935
gene30565:106569427	140.089	1.28111	0.444498	0.00394974	0.0667189	106569427	LOC106569427	protein arginine N-methyltransferase 5-like
gene39209:106578101	139.575	0.895756	0.310806	0.00395103	0.0667189	106578101	LOC106578101	rab9 effector protein with kelch motifs-like
gene46943:106585692	2469.83	-0.575735	0.199816	0.00396	0.0667564	106585692	pcsk5	proprotein convertase subtilisin/kexin type 5
gene21595:106560763	120.164	-0.801539	0.278224	0.00396525	0.0667744	106560763	LOC106560763	activating molecule in BECN1-regulated autophagy protein 1-like
gene28971:106567917	2786.72	0.616934	0.214155	0.00396685	0.0667744	106567917	LOC106567917	non-histone chromosomal protein HMG-14-like
gene14394:100286534	6607.81	0.709569	0.246381	0.00397719	0.0668109	100286534	hs90b	Heat shock protein HSP 90-beta
gene32870:100196245	318.874	0.710085	0.246564	0.0039777	0.0668109	100196245	fkbp3	FK506 binding protein 3
gene37804:100196663	594.029	1.16458	0.404331	0.00397352	0.0668109	100196663	LOC100196663	adenosine kinase a
gene40157:106579032	679.408	-0.805048	0.279713	0.00400051	0.0671451	106579032	LOC106579032	granulins-like
gene40841:106579730	27.9238	1.36017	0.472732	0.00401144	0.0672798	106579730	terf1	telomeric repeat binding factor 1
gene30903:106569784	32.8116	-1.69953	0.591062	0.00403534	0.0675737	106569784	eppk1	epiplakin 1
gene31344:106570183	251.407	-0.677582	0.23565	0.00403552	0.0675737	106570183	LOC106570183	protein Jumonji-like
gene38485:106577390	31.2238	1.06608	0.370783	0.00403775	0.0675737	106577390	LOC106577390	phospholysine phosphohistidine inorganic pyrophosphate phosphatase-like
gene21636:106561084	136.017	1.08145	0.376324	0.00405668	0.0677433	106561084	LOC106561084	G/T mismatch-specific thymine DNA glycosylase-like
gene34748:106573720	237.553	0.871365	0.303174	0.00405127	0.0677433	106573720	nlrc5	NLR family CARD domain containing 5
gene50902:106589392	276.51	0.733601	0.255279	0.00405667	0.0677433	106589392	LOC106589392	ATPase family AAA domain-containing protein 1-B
gene2101:100380870	290.111	0.592575	0.206295	0.00407284	0.0679641	100380870	LOC100380870	superkiller viralicidic activity 2-like 2
gene13162:106606510	183.994	1.08572	0.378108	0.00408586	0.0680338	106606510	LOC106606510	heat shock protein 75 kDa, mitochondrial-like
gene30318:106569199	8365.65	-1.5024	0.523152	0.00408115	0.0680338	106569199	LOC106569199	glutamine synthetase-like
gene3627:106576663	223.291	0.964263	0.335794	0.00408407	0.0680338	106576663	LOC106576663	probable 28S rRNA (cytosine-C(5))-methyltransferase
gene18154:100380626	838.52	-0.455762	0.158742	0.00409063	0.0680641	100380626	LOC100380626	E3 ubiquitin-protein ligase HECTD1
gene32712:106571510	1015.53	0.511559	0.178218	0.00409938	0.0680652	106571510	cssa15h14orf2	chromosome ssa15 open reading frame, human C14orf2
gene45500:100196134	187.572	0.68068	0.237138	0.00409953	0.0680652	100196134	itpa	inosine triphosphatase
gene51254:106589696	715.65	0.850478	0.296263	0.0040958	0.0680652	106589696	lrpprc	leucine rich pentatricopeptide repeat containing
gene12294:106605609	82.7402	-1.25643	0.437887	0.00411378	0.0682527	106605609	LOC106605609	TBC1 domain family member 15-like
gene29415:106568317	266.291	0.600075	0.209162	0.00411832	0.068279	106568317	ppwd1	peptidylprolyl isomerase domain and WD repeat containing 1
gene40181:100380795	455.322	0.734084	0.255955	0.00413045	0.068431	100380795	LOC100380795	26S proteasome non-ATPase regulatory subunit 11B
gene23902:106563051	43.5149	-2.48387	0.86615	0.00413449	0.0684487	106563051	LOC106563051	zinc finger protein 703-like
gene46936:106585698	124.279	-0.684375	0.238791	0.00415692	0.0687709	106585698	LOC106585698	fibrous sheath CABYR-binding protein-like
gene32093:100196845	217.796	0.82798	0.288921	0.00416006	0.0687735	100196845	grsf1	G-rich RNA sequence binding factor 1
gene37989:100286577	70.463	1.07058	0.373608	0.00416338	0.0687792	100286577	gins1	GINS complex subunit 1
gene19963:106613034	66.5763	-0.784637	0.273901	0.00417436	0.0688101	106613034	LOC106613034	protein Smaug homolog 2-like
gene49954:106588312	204.124	-0.745791	0.26036	0.00417717	0.0688101	106588312	LOC106588312	semaphorin-4A-like
gene52064:106590525	160.364	-0.980552	0.342309	0.00417637	0.0688101	106590525	LOC106590525	carboxymethylenebutenolidase homolog
gene8772:106602330	100.643	0.981721	0.342672	0.00417141	0.0688101	106602330	LOC106602330	uncharacterized LOC106602330
gene50501:106588934	217.071	-1.03871	0.362812	0.00419714	0.0690898	106588934	LOC106588934	pyruvate dehydrogenase (acetyl-transferring) kinase isozyme 2, mitochondrial-like
gene15037:106608224	1384.04	0.790268	0.276059	0.00420084	0.0691014	106608224	LOC106608224	26S protease regulatory subunit 4-like
gene15259:106608440	33.2326	-1.0319	0.360713	0.00422668	0.06919	106608440	LOC106608440	uncharacterized LOC106608440
gene31980:106570835	149.824	3.53701	1.23631	0.00422378	0.06919	106570835	LOC106570835	perforin-1-like
gene35297:100286712	86.6657	1.00323	0.350636	0.00422068	0.06919	100286712	polr2h	RNA polymerase II subunit H
gene43056:106581914	61.6622	-0.986235	0.344754	0.00422719	0.06919	106581914	LOC106581914	rho GTPase-activating protein 6-like
gene6346:106599488	246.994	0.948082	0.331366	0.00422133	0.06919	106599488	LOC106599488	presequence protease, mitochondrial-like
gene72737:106592591	181.899	-0.753234	0.263209	0.00421331	0.06919	106592591	LOC106592591	uncharacterized LOC106592591
gene8093:106601729	140.155	-0.784394	0.274126	0.00421723	0.06919	106601729	LOC106601729	protein Tob1-like
gene2875:106569849	177.038	0.891627	0.311769	0.00423777	0.0692649	106569849	surf6	surfeit 6
gene48569:106587329	542.698	0.82783	0.289455	0.00423686	0.0692649	106587329	LOC106587329	ubiquitin carboxyl-terminal hydrolase 10-like
gene41523:100286532	60.5074	0.980351	0.34284	0.00424308	0.0693026	100286532	cenph	centromere protein H
gene24554:106563672	59.6281	0.942051	0.329498	0.00424916	0.0693416	106563672	LOC106563672	protein CXorf40A-like
gene28590:106567492	218.891	-0.98394	0.34417	0.00425147	0.0693416	106567492	LOC106567492	glucocorticoid receptor-like
gene13081:106606425	69.8556	-1.54466	0.540429	0.00426032	0.0693585	106606425	LOC106606425	ethanolamine-phosphate cytidylyltransferase-like
gene1598:106610704	546.072	0.617257	0.21599	0.00426579	0.0693585	106610704	psmb1	proteasome subunit beta 1
gene16125:106609195	307.034	0.71596	0.250519	0.00426454	0.0693585	106609195	LOC106609195	NADH dehydrogenase [ubiquinone] 1 alpha subcomplex subunit 5-like
gene27765:106566610	146.586	-0.692873	0.242404	0.00425867	0.0693585	106566610	LOC106566610	FYVE, RhoGEF and PH domain-containing protein 3-like
gene30466:106569305	57.8772	1.19373	0.417729	0.00426752	0.0693585	106569305	LOC106569305	outer dense fiber protein 2-like
gene27730:106566645	497.261	-0.619916	0.217006	0.00428104	0.0695239	106566645	LOC106566645	membrane-associated guanylate kinase, WW and PDZ domain-containing protein 1-like
gene453:106582390	152.303	1.02796	0.3599	0.00428673	0.0695239	106582390	LOC106582390	signal recognition particle 14 kDa protein-like
gene50279:106588708	280.013	0.903453	0.316297	0.00428547	0.0695239	106588708	mrps18b	mitochondrial ribosomal protein S18B
gene19098:106612085	2299.84	-0.952761	0.333705	0.00430236	0.0696327	106612085	LOC106612085	retinoic acid receptor responder protein 3-like
gene27237:106566185	61.3812	0.944354	0.330766	0.00430296	0.0696327	106566185	LOC106566185	coiled-coil domain-containing protein 51-like
gene51804:106590305	255.005	-0.88138	0.308729	0.0043055	0.0696327	106590305	acbd5	acyl-CoA binding domain containing 5
gene868:106602525	100.061	0.940704	0.32947	0.00430088	0.0696327	106602525	LOC106602525	eukaryotic translation initiation factor 2 subunit 1-like
gene20379:106613367	67.1322	0.919214	0.322088	0.0043183	0.069742	106613367	opa3	OPA3, outer mitochondrial membrane lipid metabolism regulator
gene42940:106581811	128.052	-0.694797	0.243438	0.00431592	0.069742	106581811	tanc1	tetratricopeptide repeat, ankyrin repeat and coiled-coil containing 1
gene10339:106603764	72.8834	0.794767	0.278577	0.00433154	0.069907	106603764	rexo2	RNA exonuclease 2
gene39822:106578729	332.175	1.59452	0.558952	0.0043351	0.0699155	106578729	LOC106578729	uncharacterized LOC106578729
gene14396:106607599	312.688	0.678258	0.237904	0.00435857	0.0700896	106607599	LOC106607599	proteasome subunit alpha type-6
gene22091:106561261	110.263	0.771577	0.270626	0.00435707	0.0700896	106561261	LOC106561261	collagen alpha-1(VI) chain-like
gene33719:106572567	109.53	1.32863	0.466006	0.00435693	0.0700896	106572567	LOC106572567	zinc finger and BTB domain-containing protein 48-like
gene34476:106573341	40.7833	0.977543	0.342902	0.00436106	0.0700896	106573341	LOC106573341	uncharacterized protein KIAA1644 homolog
gene47390:100380605	187.198	0.614816	0.215658	0.00435984	0.0700896	100380605	pyr5	Uridine 5-monophosphate synthase
gene40394:100194595	593.952	0.539297	0.189197	0.00436571	0.0701154	100194595	rpl19	ribosomal protein L19
gene21304:106560492	198.109	0.936214	0.328477	0.00436967	0.0701303	106560492	usp1	ubiquitin specific peptidase 1
gene30228:106569079	599.773	-1.24576	0.437459	0.00440332	0.0704745	106569079	LOC106569079	serine/threonine-protein kinase PLK3-like
gene35085:106573940	58.7698	1.14967	0.4037	0.00440194	0.0704745	106573940	sass6	SAS-6 centriolar assembly protein
gene70863:106594621	49.426	-1.1977	0.420549	0.0044003	0.0704745	106594621	LOC106594621	trinucleotide repeat-containing gene 6A protein-like
gene7272:106600842	202.585	0.686118	0.240907	0.00439871	0.0704745	106600842	LOC106600842	chromobox protein homolog 1-like
gene11969:100196863	244.728	-0.783034	0.274997	0.00440739	0.0704896	100196863	ensa	endosulfine alpha
gene62007:106595213	226.52	-1.38366	0.485971	0.00441037	0.0704896	106595213	pgm2	phosphoglucomutase 2
gene74755:106595569	88.6919	0.828913	0.291171	0.0044157	0.070526	106595569	med28	mediator complex subunit 28
gene19054:106612036	242.976	-0.735747	0.258467	0.0044192	0.0705331	106612036	LOC106612036	calcium uptake protein 3, mitochondrial-like
gene30351:106569167	53.3853	-0.970968	0.341207	0.00443163	0.070665	106569167	LOC106569167	solute carrier family 22 member 23-like
gene9089:100194544	1415.04	-0.500573	0.175915	0.00443358	0.070665	100194544	acy3	aspartoacylase (aminocyclase) 3
gene19512:100196241	372.528	0.928612	0.326589	0.00446395	0.0710028	100196241	snrpa	small nuclear ribonucleoprotein polypeptide A
gene54101:106593780	46.2946	0.871292	0.306403	0.00446052	0.0710028	106593780	LOC106593780	BRCA1-associated ATM activator 1-like
gene78658:106593129	1602.91	-0.787991	0.277133	0.004464	0.0710028	106593129	LOC106593129	E3 ubiquitin-protein ligase RNF128 pseudogene
gene51088:106589552	460.242	-1.00682	0.354137	0.00446877	0.0710297	106589552	mkl2	MKL1/myocardin like 2
gene35274:100286651	83.2725	1.13456	0.399146	0.00447675	0.0711077	100286651	tctex1d2	Tctex1 domain containing 2
gene1786:106612336	513.082	-0.592923	0.208688	0.00449457	0.0712403	106612336	trim8	tripartite motif containing 8
gene27557:106566469	653.033	0.571211	0.201022	0.00448975	0.0712403	106566469	LOC106566469	minor histocompatibility antigen H13-like
gene38724:106577605	160.548	0.976412	0.343676	0.00449606	0.0712403	106577605	LOC106577605	zinc finger MYM-type protein 1-like
gene44858:106583655	45.1053	1.31293	0.462139	0.00449744	0.0712403	106583655	LOC106583655	uncharacterized LOC106583655
gene12292:100196525	408.915	3.33751	1.1749	0.00450184	0.0712611	100196525	ctrl	chymotrypsin-like
gene21324:106560521	334.591	0.90853	0.320061	0.00453102	0.0715758	106560521	LOC106560521	probable rRNA-processing protein EBP2
gene47605:106586374	721.409	-0.574562	0.202396	0.00452836	0.0715758	106586374	LOC106586374	1-phosphatidylinositol 3-phosphate 5-kinase-like
gene48322:106587089	248.346	-0.58391	0.205678	0.0045261	0.0715758	106587089	madd	MAP kinase activating death domain
gene42922:106581828	328.606	-0.685633	0.241563	0.00453513	0.0715918	106581828	LOC106581828	formin-like protein 2
gene35898:100195925	1548.5	0.613384	0.216153	0.00454352	0.0716752	100195925	ef1b	Elongation factor 1-beta
gene37437:106576324	3893.79	0.538091	0.189654	0.00455068	0.0717393	106576324	LOC106576324	40S ribosomal protein S16
gene22237:106561392	125.314	-0.994918	0.350799	0.00456607	0.0719327	106561392	LOC106561392	homeodomain-interacting protein kinase 2-like
gene9861:106603326	104.748	0.698295	0.246275	0.0045764	0.0720463	106603326	LOC106603326	SH3 domain-binding glutamic acid-rich-like protein
gene14433:100194853	467.908	0.901529	0.318021	0.00458526	0.0720681	100194853	cpsf3	cleavage and polyadenylation specific factor 3
gene18304:106611357	420.539	0.781712	0.275777	0.00458853	0.0720681	106611357	cenpf	centromere protein F
gene23002:100196262	3953.94	0.527707	0.186232	0.0046027	0.0720681	100196262	rl13	60S ribosomal protein L13
gene24711:106563857	57.1148	0.941591	0.332321	0.00460587	0.0720681	106563857	exosc8	exosome component 8
gene26330:106565438	736.279	0.590109	0.208241	0.00460022	0.0720681	106565438	LOC106565438	tubulin alpha chain
gene33860:106572706	91.4749	0.786083	0.277358	0.00459438	0.0720681	106572706	LOC106572706	N-alpha-acetyltransferase 10-like
gene44631:106583512	36.365	1.09658	0.387012	0.00460475	0.0720681	106583512	LOC106583512	mitotic-spindle organizing protein 1
gene4720:106587472	116.817	0.825399	0.291153	0.0045836	0.0720681	106587472	LOC106587472	nuclear pore complex protein Nup133-like
gene689:106600505	123.048	-0.782702	0.276146	0.00459146	0.0720681	106600505	LOC106600505	trichohyalin-like
gene44630:106583508	32.6748	1.22024	0.430886	0.00462695	0.072349	106583508	bora	bora, aurora kinase A activator
gene8287:106601925	73.9758	0.84338	0.297924	0.00464236	0.0725408	106601925	LOC106601925	general transcription factor IIF subunit 1-like
gene11752:106605110	226.055	0.794645	0.280905	0.00467124	0.0725738	106605110	mecr	mitochondrial trans-2-enoyl-CoA reductase
gene26594:106565904	1337.93	0.477319	0.168732	0.00467143	0.0725738	106565904	LOC106565904	60S ribosomal protein L22
gene4204:100286726	379.39	0.654858	0.231479	0.00466912	0.0725738	100286726	prs6b	26S protease regulatory subunit 6B
gene47487:100196114	1171.37	0.447698	0.158185	0.00465168	0.0725738	100196114	ro32	Heterogeneous nuclear ribonucleoprotein A3 homolog 2
gene49706:106588242	77.735	-0.721979	0.255134	0.00465775	0.0725738	106588242	LOC106588242	probable ATP-dependent RNA helicase ddx6
gene52011:106590472	401.653	0.664898	0.234987	0.00466188	0.0725738	106590472	LOC106590472	N-alpha-acetyltransferase 50-like
gene57054:106591461	67.3114	-1.84817	0.653346	0.00467275	0.0725738	106591461	LOC106591461	NACHT, LRR and PYD domains-containing protein 1-like
gene7363:106600997	225.758	0.706302	0.249604	0.00465932	0.0725738	106600997	LOC106600997	methyltransferase-like protein 2-A
gene7383:106601016	827.982	0.701991	0.24805	0.00465418	0.0725738	106601016	LOC106601016	2',3'-cyclic-nucleotide 3'-phosphodiesterase-like
gene35344:106574390	206.822	-1.24408	0.439872	0.00467993	0.0726364	106574390	LOC106574390	uncharacterized LOC106574390
gene39199:106578092	86.724	2.10516	0.744401	0.00468416	0.0726532	106578092	LOC106578092	uncharacterized LOC106578092
gene19681:106612599	142.549	-0.704768	0.24925	0.00469057	0.0727038	106612599	LOC106612599	mitogen-activated protein kinase kinase kinase kinase 5-like
gene10160:100380509	63.306	1.1218	0.39678	0.00469477	0.0727167	100380509	prr11	Proline-rich protein 11
gene20240:106613229	216.181	0.946828	0.335001	0.00470827	0.0727167	106613229	numa1	nuclear mitotic apparatus protein 1
gene34787:106573688	198.148	-0.653343	0.231113	0.00469953	0.0727167	106573688	LOC106573688	gigaxonin-like
gene4571:106585723	109.492	1.00623	0.355988	0.00470486	0.0727167	106585723	LOC106585723	nucleolar protein 11-like
gene45904:106584631	1166.49	-1.02937	0.364224	0.00471029	0.0727167	106584631	LOC106584631	phosphatidylinositol 4-phosphate 3-kinase C2 domain-containing subunit alpha-like
gene71245:100286468	1549.79	0.716012	0.253332	0.00470778	0.0727167	100286468	set	SET protein
gene10451:106603901	233.324	0.530525	0.187809	0.00473093	0.0727934	106603901	zmat2	zinc finger matrin-type 2
gene14690:106607865	236.949	0.719995	0.254923	0.00473755	0.0727934	106607865	LOC106607865	lamin-B receptor-like
gene30679:106569588	49.9153	-4.06638	1.43938	0.00472681	0.0727934	106569588	LOC106569588	uncharacterized LOC106569588
gene32301:106571160	234.764	0.562558	0.199161	0.00473339	0.0727934	106571160	mrpl19	mitochondrial ribosomal protein L19
gene42856:106581693	249.584	-0.74852	0.265045	0.00474105	0.0727934	106581693	cssa21h2orf69	chromosome ssa21 open reading frame, human C2orf69
gene44449:106583284	146.753	0.780839	0.27638	0.00472462	0.0727934	106583284	mettl1	methyltransferase like 1
gene63367:106595876	85.9163	-1.37678	0.48743	0.00473437	0.0727934	106595876	LOC106595876	protein NLRC3-like
gene7399:106601026	467.267	-1.06098	0.375516	0.00472238	0.0727934	106601026	LOC106601026	V-type proton ATPase 116 kDa subunit a isoform 1-like
gene849:100380355	1571.63	-0.686894	0.243239	0.00474363	0.0727934	100380355	hipl1	HHIP-like protein 1
gene16292:106609389	73.3456	-1.19217	0.422299	0.00475695	0.0729493	106609389	LOC106609389	probable polypeptide N-acetylgalactosaminyltransferase 8
gene10374:106603820	197.926	-1.54197	0.546635	0.0047899	0.0731216	106603820	LOC106603820	folliculin-interacting protein 1-like
gene11558:106604916	5844.25	0.578864	0.205248	0.00479755	0.0731216	106604916	LOC106604916	guanine nucleotide-binding protein subunit beta-2-like 1
gene15568:106608623	218.147	0.710381	0.251912	0.00480301	0.0731216	106608623	LOC106608623	phospholipase A-2-activating protein-like
gene22073:100380815	400.443	0.881225	0.312471	0.00479969	0.0731216	100380815	sephs1	selenophosphate synthetase 1
gene28533:100196481	223.172	0.841868	0.298357	0.00477723	0.0731216	100196481	pfd1	Prefoldin subunit 1
gene36800:106575698	190.612	0.853584	0.302494	0.00477523	0.0731216	106575698	LOC106575698	importin-5-like
gene43130:106581972	345.069	-1.39761	0.495419	0.00478642	0.0731216	106581972	LOC106581972	growth hormone-regulated TBC protein 1-A-like
gene44426:106583299	39.3412	-2.64006	0.93575	0.00478254	0.0731216	106583299	calcoco1	calcium binding and coiled-coil domain 1
gene45979:106584716	135.555	-0.690893	0.244966	0.00479692	0.0731216	106584716	LOC106584716	ubiquitin-conjugating enzyme E2 Q2-like
gene47086:106585838	79.345	-0.920998	0.32647	0.00478619	0.0731216	106585838	ccser1	coiled-coil serine rich protein 1
gene51932:106590387	29.4346	-1.33866	0.4747	0.00480209	0.0731216	106590387	LOC106590387	histone-lysine N-methyltransferase 2C-like
gene34381:106573192	684.674	0.463545	0.164417	0.00481232	0.0732151	106573192	LOC106573192	NADH dehydrogenase [ubiquinone] 1 alpha subcomplex subunit 9, mitochondrial-like
gene25535:106564661	431.368	-0.669007	0.237438	0.00483828	0.0733064	106564661	LOC106564661	trinucleotide repeat-containing gene 6C protein-like
gene31532:106570401	238.123	-0.55987	0.198654	0.00482755	0.0733064	106570401	LOC106570401	focal adhesion kinase 1-like
gene35233:106574152	57.6978	-1.51136	0.536351	0.00483444	0.0733064	106574152	LOC106574152	thromboxane A2 receptor-like
gene39526:106578449	232.434	0.809716	0.287355	0.00483501	0.0733064	106578449	pola1	DNA polymerase alpha 1, catalytic subunit
gene40693:106579599	400.338	-0.859035	0.304888	0.00483929	0.0733064	106579599	LOC106579599	histone-lysine N-methyltransferase 2C-like
gene40811:106579698	29.3	1.16745	0.414364	0.00484054	0.0733064	106579698	LOC106579698	probable polyketide synthase 1
gene8784:106602346	68.1772	1.20505	0.427687	0.00483858	0.0733064	106602346	LOC106602346	SWI/SNF-related matrix-associated actin-dependent regulator of chromatin subfamily A member 5
gene51075:106589546	219.054	0.916835	0.325439	0.0048441	0.0733123	106589546	LOC106589546	mitochondrial import receptor subunit TOM22 homolog
gene32329:100136579	1792.06	-3.00035	1.06561	0.00486821	0.0736288	100136579	LOC100136579	apolipoprotein B-100
gene21388:106560582	149.149	-0.782735	0.278048	0.00487612	0.0737002	106560582	dlg1	discs large MAGUK scaffold protein 1
gene2554:106566653	104.892	-0.723483	0.25707	0.00488769	0.0738199	106566653	LOC106566653	phosphatidylinositol 4-phosphate 5-kinase type-1 beta-like
gene45273:100286690	958.827	-0.726533	0.25817	0.00489043	0.0738199	100286690	LOC100286690	tyrosine-protein kinase JAK1
gene36516:106575430	414.311	0.634607	0.225527	0.0048947	0.0738362	106575430	LOC106575430	ELAV-like protein 1
gene12393:106605745	41.9057	0.978779	0.348143	0.00493218	0.0739885	106605745	LOC106605745	myosin-10-like
gene2192:106562702	1373.52	0.626813	0.222936	0.00492922	0.0739885	106562702	LOC106562702	voltage-dependent anion-selective channel protein 2-like
gene2504:106567149	304.702	1.09133	0.388189	0.00493363	0.0739885	106567149	LOC106567149	78 kDa glucose-regulated protein-like
gene25359:106564502	111.68	-1.80067	0.640307	0.00492038	0.0739885	106564502	LOC106564502	volume-regulated anion channel subunit LRRC8C-like
gene26514:100195291	201.042	0.895584	0.318519	0.00492783	0.0739885	100195291	bysl	bystin like
gene27972:106566827	101.286	1.08175	0.384575	0.00491051	0.0739885	106566827	LOC106566827	histone-lysine N-methyltransferase SUV39H1-like
gene33733:106572634	1042.47	-0.719331	0.255766	0.00491637	0.0739885	106572634	LOC106572634	fibrous sheath CABYR-binding protein-like
gene35695:106574606	112.855	-0.866668	0.308187	0.00492109	0.0739885	106574606	LOC106574606	guanine nucleotide exchange factor DBS-like
gene75357:106596199	1183.26	-0.98628	0.35069	0.00491733	0.0739885	106596199	LOC106596199	protein NLRC3-like
gene4379:106584053	79.0098	0.981478	0.349254	0.00495092	0.0741995	106584053	mms22l	MMS22 like, DNA repair protein
gene12046:100194668	674.853	0.781683	0.278239	0.00496338	0.0742738	100194668	LOC100194668	T-complex protein 1 subunit gamma
gene25543:106564655	26.7133	1.38429	0.492771	0.00496673	0.0742738	106564655	LOC106564655	transcription elongation factor, mitochondrial-like
gene27281:106566230	1008.91	0.573659	0.204217	0.00496855	0.0742738	106566230	LOC106566230	60S ribosomal protein L29-like
gene29701:106568625	151.347	1.36502	0.485936	0.00496874	0.0742738	106568625	myc	MYC proto-oncogene, bHLH transcription factor
gene14855:106608040	28.4554	-1.11662	0.397729	0.00499277	0.0745532	106608040	LOC106608040	1-phosphatidylinositol 4,5-bisphosphate phosphodiesterase beta-4-like
gene39002:106577892	9787.44	-0.702288	0.250153	0.00499389	0.0745532	106577892	LOC106577892	mucin-17-like
gene53858:106592861	76.9583	0.780468	0.278028	0.00499808	0.0745676	106592861	LOC106592861	deoxyhypusine synthase-like
gene44248:100195665	307.781	0.85406	0.304279	0.00500317	0.0745954	100195665	ruxe	Small nuclear ribonucleoprotein E
gene11703:106605064	140.346	1.02734	0.366149	0.00501943	0.0747184	106605064	LOC106605064	nuclear factor 7, brain-like
gene32903:106571741	156.935	1.02436	0.365114	0.0050224	0.0747184	106571741	trmt6	tRNA methyltransferase 6
gene35070:106573930	90.4335	0.783758	0.279327	0.00501802	0.0747184	106573930	LOC106573930	growth arrest and DNA damage-inducible protein GADD45 beta-like
gene38128:106577010	183.521	-0.682157	0.243153	0.00502436	0.0747184	106577010	LOC106577010	tumor necrosis factor receptor superfamily member 6-like
gene11882:106605200	483.482	-0.968209	0.34517	0.00503134	0.0747259	106605200	tmem106b	transmembrane protein 106B
gene77673:106594108	182.001	-1.08628	0.387245	0.00502924	0.0747259	106594108	LOC106594108	phosphoglucomutase-2-like
gene27194:106566136	110.586	-0.828082	0.295248	0.00503636	0.0747524	106566136	LOC106566136	rho GTPase-activating protein 12-like
gene16162:106609325	55.5492	1.14228	0.407362	0.00504587	0.0748249	106609325	LOC106609325	mitochondrial 10-formyltetrahydrofolate dehydrogenase-like
gene41499:106580383	1166.1	0.65899	0.23502	0.00504773	0.0748249	106580383	LOC106580383	transitional endoplasmic reticulum ATPase-like
gene13294:100194883	959.447	0.576398	0.205623	0.00506014	0.0749542	100194883	rs2	40S ribosomal protein S2
gene25886:106565035	268.984	0.544373	0.194211	0.00506294	0.0749542	106565035	LOC106565035	cytochrome c oxidase subunit 6C-1
gene11353:106604704	287.884	-0.571751	0.204024	0.00507275	0.0749553	106604704	foxo4	forkhead box O4
gene21066:106560255	148.306	0.697975	0.249053	0.00507056	0.0749553	106560255	anapc4	anaphase promoting complex subunit 4
gene21855:100286581	548.203	1.01553	0.362334	0.00506714	0.0749553	100286581	cotl1	coactosin-like 1 (Dictyostelium)
gene17719:106610772	501.461	0.928143	0.331251	0.00507978	0.0749633	106610772	LOC106610772	cytochrome c oxidase subunit 7A2, mitochondrial-like
gene18031:100195210	361.879	0.662805	0.236546	0.00507844	0.0749633	100195210	ampm1	Methionine aminopeptidase 1
gene19849:106612854	2761.28	-1.29703	0.463059	0.00509447	0.0749883	106612854	LOC106612854	solute carrier family 13 member 2-like
gene30746:106569630	50.7954	-0.884102	0.31563	0.00509325	0.0749883	106569630	LOC106569630	rho GTPase-activating protein 12-like
gene38234:106577118	5054.52	0.512809	0.183043	0.00508534	0.0749883	106577118	LOC106577118	ubiquitin-40S ribosomal protein S27a
gene6768:106600004	32.9493	-1.47036	0.524908	0.00509177	0.0749883	106600004	LOC106600004	protein unc-13 homolog A-like
gene13450:106606806	361.437	0.601715	0.214868	0.00510404	0.0750357	106606806	gtf2f1	general transcription factor IIF subunit 1
gene44058:106582889	130.225	0.733924	0.26208	0.00510418	0.0750357	106582889	LOC106582889	zinc fingers and homeoboxes protein 3-like
gene21263:106560446	1085.46	-1.25444	0.448147	0.0051232	0.0752083	106560446	LOC106560446	mucolipin-3-like
gene41703:106580567	1100.41	0.529855	0.189314	0.00512895	0.0752083	106580567	LOC106580567	60S ribosomal protein L37-like
gene41987:106580892	36.8925	1.23371	0.440795	0.00512875	0.0752083	106580892	LOC106580892	histone H3.3-like
gene44893:106583697	477.747	0.489348	0.174821	0.00512406	0.0752083	106583697	LOC106583697	cytochrome c oxidase assembly protein COX14 homolog
gene22337:106561497	222.042	-0.551304	0.197044	0.00514399	0.0752612	106561497	LOC106561497	RING finger protein 141-like
gene26039:106565197	535.079	0.698475	0.249759	0.00516431	0.0752612	106565197	LOC106565197	isocitrate dehydrogenase [NAD] subunit beta, mitochondrial-like
gene31354:106570222	46.9807	0.970472	0.347132	0.00517891	0.0752612	106570222	LOC106570222	RNA polymerase II subunit A C-terminal domain phosphatase-like
gene33427:100196529	237.407	0.719703	0.257339	0.00516261	0.0752612	100196529	lzic	leucine zipper and CTNNBIP1 domain containing
gene41308:106579907	63.4375	-1.2824	0.458558	0.00516464	0.0752612	106579907	slc15a4	solute carrier family 15 member 4
gene47396:106586165	211.65	0.748945	0.267718	0.00514982	0.0752612	106586165	LOC106586165	pre-mRNA-processing factor 40 homolog A-like
gene47475:100194626	2186.83	0.698686	0.249702	0.00514075	0.0752612	100194626	atp5g3	ATP synthase, H+ transporting, mitochondrial F0 complex, subunit c-3
gene47719:106586480	653.454	-0.740069	0.264675	0.00517167	0.0752612	106586480	LOC106586480	TBC1 domain family member 8-like
gene48886:100196014	589.665	0.610783	0.218322	0.00514794	0.0752612	100196014	psa4	Proteasome subunit alpha type-4
gene4940:106589615	162.599	0.548257	0.196054	0.00516663	0.0752612	106589615	LOC106589615	filaggrin-2-like
gene49648:106588197	33.2393	-1.39654	0.499517	0.00517737	0.0752612	106588197	LOC106588197	eomesodermin-like
gene50573:106589005	600.906	0.65449	0.234085	0.00517483	0.0752612	106589005	LOC106589005	proteasome subunit alpha type-2-like
gene50596:106589024	221.806	1.22813	0.438927	0.00514147	0.0752612	106589024	LOC106589024	RNA-binding protein 43-like
gene50964:106589450	627.647	0.797281	0.285142	0.00517254	0.0752612	106589450	LOC106589450	poly [ADP-ribose] polymerase 9-like
gene9500:100137020	110.507	0.821296	0.293789	0.00518144	0.0752612	100137020	rtn7	reticulon 7
gene11927:100196667	766.519	0.613559	0.219583	0.0052029	0.0752937	100196667	rbm8a	RNA binding motif protein 8A
gene21910:106560844	29.8266	-1.07262	0.383869	0.00520215	0.0752937	106560844	LOC106560844	core-binding factor subunit beta-like
gene35105:106573985	59.0134	0.893253	0.319684	0.00520324	0.0752937	106573985	LOC106573985	angio-associated migratory cell protein-like
gene38740:106577620	30.8724	0.96768	0.346206	0.00518837	0.0752937	106577620	LOC106577620	uncharacterized LOC106577620
gene39531:106578447	512.731	0.677271	0.242378	0.0052016	0.0752937	106578447	LOC106578447	NADH dehydrogenase [ubiquinone] 1 beta subcomplex subunit 4-like
gene47191:106585944	218.106	-1.08008	0.386473	0.00519452	0.0752937	106585944	LOC106585944	nucleotide-binding oligomerization domain-containing protein 1-like
gene1574:106610188	885.284	0.579403	0.207405	0.0052128	0.0753848	106610188	LOC106610188	uncharacterized LOC106610188
gene30859:106569740	43.7955	-1.14458	0.409959	0.00523934	0.0756739	106569740	LOC106569740	ras-related protein Rab-31-like
gene42421:106581278	232.315	0.863664	0.309342	0.00523927	0.0756739	106581278	LOC106581278	serpin H1-like
gene737:106601433	57.9733	0.889423	0.318608	0.00524503	0.0757088	106601433	fam98b	family with sequence similarity 98 member B
gene25999:106565234	43.161	-1.28993	0.46227	0.00526391	0.0758419	106565234	LOC106565234	histone deacetylase 7-like
gene41596:106580466	116.608	0.954297	0.341969	0.0052611	0.0758419	106580466	LOC106580466	tRNA (uracil-5-)-methyltransferase homolog A-like
gene46016:106584748	121.871	1.13055	0.405157	0.00526411	0.0758419	106584748	LOC106584748	protein regulator of cytokinesis 1-like
gene28096:106566991	27.061	-1.16561	0.417763	0.00526866	0.0758602	106566991	LOC106566991	probable E3 ubiquitin-protein ligase makorin-2
gene21893:100195049	575.149	0.818126	0.293306	0.00528178	0.0759964	100195049	aars	alanyl-tRNA synthetase
gene38125:106577007	511.895	-0.712746	0.255543	0.0052847	0.0759964	106577007	LOC106577007	multiple inositol polyphosphate phosphatase 1-like
gene12257:106605633	312.761	0.68814	0.246773	0.0052945	0.0760447	106605633	LOC106605633	transmembrane protein 147
gene43023:100196051	51.8902	4.04261	1.44972	0.00529465	0.0760447	100196051	i20ra	Interleukin-20 receptor alpha chain
gene21686:106561037	223.142	-0.809133	0.290235	0.00530586	0.0761584	106561037	LOC106561037	ceramide kinase-like
gene19237:106612226	487.84	0.547752	0.196523	0.00531625	0.0762601	106612226	LOC106612226	cytochrome b-c1 complex subunit 8-like
gene45165:106583904	110.557	-1.02697	0.368488	0.00532028	0.0762706	106583904	LOC106583904	glycerophosphodiester phosphodiesterase domain-containing protein 3-like
gene45902:106584630	1953.41	0.476972	0.17116	0.00532474	0.0762872	106584630	LOC106584630	ubiquitin-60S ribosomal protein L40
gene28209:106567090	39.097	1.26556	0.454264	0.00533704	0.0764034	106567090	LOC106567090	tubulin alpha chain
gene28931:100196188	44.8544	1.24919	0.448411	0.00533947	0.0764034	100196188	btg3	B-cell translocation gene 3
gene847:100196261	131.418	0.752548	0.270188	0.00534817	0.0764805	100196261	haus2	HAUS augmin like complex subunit 2
gene37527:106576375	74.1439	-0.972473	0.349204	0.00535562	0.0765397	106576375	LOC106576375	uncharacterized LOC106576375
gene14449:106607675	321.049	0.878326	0.315496	0.00537011	0.0766993	106607675	cebpz	CCAAT/enhancer binding protein zeta
gene20935:106613883	73.0078	0.959615	0.344741	0.00537621	0.076739	106613883	LOC106613883	DEP domain-containing protein 1A-like
gene1361:106607983	175.359	0.967906	0.347842	0.00539245	0.0768182	106607983	LOC106607983	polyribonucleotide nucleotidyltransferase 1, mitochondrial-like
gene2935:100195175	1526.22	-0.804013	0.28898	0.00539839	0.0768182	100195175	p2rx4	P2X purinoceptor 4
gene4671:106587952	756.278	0.660996	0.237538	0.0053909	0.0768182	106587952	LOC106587952	proteasome subunit beta type-3
gene47740:106586502	99.3187	0.774383	0.278264	0.00538738	0.0768182	106586502	LOC106586502	serine/arginine repetitive matrix protein 2-like
gene915:106603641	252.98	-0.957299	0.34405	0.00539515	0.0768182	106603641	LOC106603641	microtubule-associated protein RP/EB family member 3-like
gene46749:106585457	794.926	0.758205	0.272547	0.00540385	0.0768485	106585457	LOC106585457	prostaglandin E synthase 2-like
gene42215:106581067	149.176	0.644889	0.231854	0.00541179	0.0769141	106581067	LOC106581067	ribosome maturation protein SBDS
gene9044:100136395	239.168	0.633824	0.227907	0.0054182	0.0769578	100136395	alp	alkaline phosphatase
gene16289:106609392	50.6096	-1.12828	0.405834	0.00543334	0.0771253	106609392	LOC106609392	probable polypeptide N-acetylgalactosaminyltransferase 8
gene14660:106607838	29.2824	1.1444	0.412016	0.00547665	0.0772783	106607838	LOC106607838	uncharacterized LOC106607838
gene24198:106563184	224.177	-1.07091	0.385373	0.00545461	0.0772783	106563184	LOC106563184	V-type proton ATPase 116 kDa subunit a isoform 2-like
gene25203:106564351	1649.55	-0.600132	0.215953	0.00545279	0.0772783	106564351	LOC106564351	synaptogyrin-2-like
gene36590:106575515	40.4001	-1.17789	0.424162	0.00548664	0.0772783	106575515	LOC106575515	dTDP-D-glucose 4,6-dehydratase-like
gene40237:106579275	190.77	0.688657	0.247928	0.00547543	0.0772783	106579275	mrpl43	mitochondrial ribosomal protein L43
gene42239:106581086	1367.38	-0.511379	0.184103	0.0054748	0.0772783	106581086	LOC106581086	carbonic anhydrase 4-like
gene43592:106582434	954.515	0.664548	0.239281	0.0054817	0.0772783	106582434	LOC106582434	NADH dehydrogenase [ubiquinone] 1 alpha subcomplex subunit 10, mitochondrial-like
gene43705:106582535	44.7984	-1.02062	0.367524	0.00548591	0.0772783	106582535	LOC106582535	fer-1-like protein 6
gene44443:106583288	177.336	-0.875157	0.315176	0.00549096	0.0772783	106583288	LOC106583288	SPRY domain-containing protein 3-like
gene4699:106587683	188.041	0.861308	0.310186	0.00549053	0.0772783	106587683	LOC106587683	39S ribosomal protein L45, mitochondrial-like
gene50889:106589381	157.333	0.841901	0.302961	0.00545416	0.0772783	106589381	LOC106589381	kinesin-like protein KIF20A
gene51401:106589841	49.1128	0.90697	0.326602	0.00548647	0.0772783	106589841	LOC106589841	ADP-ribosylation factor-like protein 3
gene69690:101448004	70.1482	1.04052	0.37466	0.00548212	0.0772783	101448004	as1la	Histone chaperone asf1-A
gene73640:100196404	53.528	-2.12974	0.766939	0.00548738	0.0772783	100196404	bt2a2	Butyrophilin subfamily 2 member A2
gene14155:106607262	78.7197	0.716748	0.258252	0.00551367	0.0774594	106607262	LOC106607262	synaptic vesicle membrane protein VAT-1 homolog
gene37292:100196024	266.551	0.90113	0.324711	0.00551725	0.0774594	100196024	nudt5	nudix (nucleoside diphosphate linked moiety X)-type motif 5
gene47855:106586622	114.841	-0.993883	0.358133	0.00551711	0.0774594	106586622	LOC106586622	neural cell adhesion molecule 1-like
gene56602:100380491	1302.52	-0.532033	0.191676	0.00550854	0.0774594	100380491	clrn3	Clarin-3
gene4681:106587857	285.353	1.16064	0.418259	0.00552139	0.0774706	106587857	LOC106587857	tensin-4-like
gene18816:106611699	621.514	0.742928	0.267757	0.00552633	0.0774928	106611699	LOC106611699	glyoxylate reductase/hydroxypyruvate reductase-like
gene16836:100195616	157.325	0.631173	0.227498	0.00553024	0.0775006	100195616	pdli3	PDZ and LIM domain protein 3
gene23307:106562456	232.838	0.606397	0.218677	0.00555387	0.0777802	106562456	LOC106562456	40S ribosomal protein S17-like
gene30868:106569748	193.769	-0.688136	0.24817	0.00555693	0.0777802	106569748	LOC106569748	zinc finger FYVE domain-containing protein 9-like
gene33070:100196676	1193.74	0.758757	0.273734	0.00557337	0.0779631	100196676	cnbp	CCHC-type zinc finger, nucleic acid binding protein
gene33985:106572836	319.042	-0.635045	0.22912	0.00557687	0.0779648	106572836	LOC106572836	SRSF protein kinase 1-like
gene55080:106595282	97.1606	-0.816212	0.294518	0.00558251	0.0779964	106595282	LOC106595282	rab-3A-interacting protein-like
gene21757:106560988	158.392	0.857983	0.309706	0.00560029	0.0781503	106560988	LOC106560988	28S ribosomal protein S35, mitochondrial-like
gene9643:100194857	148.436	0.697795	0.251873	0.00559825	0.0781503	100194857	pold3	DNA polymerase delta 3, accessory subunit
gene1764:106612469	594.272	-0.712388	0.257175	0.00560482	0.0781663	106612469	LOC106612469	nucleolar RNA helicase 2-like
gene15483:106608593	280.391	0.806347	0.29119	0.0056204	0.0783362	106608593	LOC106608593	RNA-binding protein 4.1-like
gene11367:106604719	454.381	0.688139	0.248538	0.00562716	0.0783832	106604719	mrpl11	mitochondrial ribosomal protein L11
gene34915:100196155	425.425	0.613916	0.221755	0.00563246	0.0784096	100196155	nduab	NADH dehydrogenase 1 alpha subcomplex subunit 11
gene11998:100195690	39.376	0.8681	0.313662	0.00564665	0.0784181	100195690	metl6	Methyltransferase-like protein 6
gene251:106563434	309.633	0.598239	0.216111	0.00563665	0.0784181	106563434	selenon	selenoprotein N
gene38211:106577137	422.267	1.07673	0.389036	0.00564554	0.0784181	106577137	LOC106577137	kinesin-like protein KIF11-B
gene41235:106579965	53.7756	1.16935	0.4225	0.00564529	0.0784181	106579965	LOC106579965	P2X purinoceptor 4-like
gene34174:106573027	245.122	0.994644	0.359481	0.00565938	0.0785477	106573027	nat10	N-acetyltransferase 10
gene34815:106573657	140.917	0.77158	0.278937	0.00567237	0.0786073	106573657	prmt7	protein arginine methyltransferase 7
gene37867:106576822	1718.32	-0.793116	0.286752	0.00567729	0.0786073	106576822	LOC106576822	heparan-alpha-glucosaminide N-acetyltransferase-like
gene47869:106586632	175.123	-1.68097	0.607723	0.00567458	0.0786073	106586632	LOC106586632	protein dopey-2-like
gene9831:106603302	104.821	0.889219	0.321494	0.0056767	0.0786073	106603302	LOC106603302	zinc finger MYM-type protein 3-like
gene14839:106608027	106.753	0.943583	0.341327	0.00570182	0.0787309	106608027	ccdc167	coiled-coil domain containing 167
gene25553:106564644	882.521	0.673057	0.24343	0.00569419	0.0787309	106564644	LOC106564644	ATP-dependent RNA helicase DDX39A
gene33786:106572585	5248.39	0.599349	0.21684	0.00570949	0.0787309	106572585	LOC106572585	heterogeneous nuclear ribonucleoprotein A1-like
gene38994:106577888	362.704	0.659436	0.238582	0.00571008	0.0787309	106577888	LOC106577888	proline-, glutamic acid- and leucine-rich protein 1-like
gene48019:106586751	904.371	-0.525658	0.190175	0.00570853	0.0787309	106586751	LOC106586751	immunoglobulin-like domain-containing receptor 1
gene7027:106600680	328.21	-0.905478	0.327534	0.00570054	0.0787309	106600680	LOC106600680	uncharacterized LOC106600680
gene7350:106600986	1699.78	0.504311	0.182388	0.00569144	0.0787309	106600986	LOC106600986	60S ribosomal protein L19-like
gene18177:106611239	1449.3	0.595945	0.215736	0.0057382	0.0789217	106611239	LOC106611239	proteasome subunit alpha type-3
gene19412:106612387	133.634	0.789528	0.285847	0.00574369	0.0789217	106612387	mrpl28	mitochondrial ribosomal protein L28
gene24162:106563215	367.338	-0.546012	0.197699	0.00574784	0.0789217	106563215	LOC106563215	protein unc-13 homolog B-like
gene26980:106566014	2383.2	0.516056	0.186807	0.00573579	0.0789217	106566014	LOC106566014	40S ribosomal protein S10-like
gene49917:106588338	1181.9	0.606567	0.219618	0.00574629	0.0789217	106588338	LOC106588338	proteasome subunit beta type-4-like
gene7927:106601555	3748.27	0.537049	0.194386	0.005731	0.0789217	106601555	LOC106601555	60S ribosomal protein L27
gene9596:100196448	356.071	0.810145	0.29323	0.00573028	0.0789217	100196448	apoo	apolipoprotein O
gene20635:106613625	2183.81	0.460193	0.166668	0.00576007	0.0790231	106613625	LOC106613625	ubiquitin-60S ribosomal protein L40-like
gene2066:100195612	38.3965	1.15883	0.419811	0.00577375	0.0790231	100195612	swi5	SWI5 homologous recombination repair protein
gene28150:106567046	896.824	-0.537374	0.19465	0.0057674	0.0790231	106567046	kmt2d	lysine methyltransferase 2D
gene33433:106572045	70.8728	-1.86872	0.677011	0.00577576	0.0790231	106572045	LOC106572045	properdin-like
gene44827:106583625	92.0148	0.795132	0.288002	0.00576503	0.0790231	106583625	tp53rk	TP53 regulating kinase
gene50424:100194472	33.9649	-1.05838	0.38341	0.00577226	0.0790231	100194472	hoxa5aa	homeobox protein HoxA5aa
gene23195:106562362	194.41	-0.816184	0.295724	0.00578103	0.0790484	106562362	LOC106562362	tripartite motif-containing protein 66-like
gene20025:106612983	10578.1	0.48087	0.174327	0.00580772	0.0793196	106612983	LOC106612983	40S ribosomal protein S25-like
gene38618:100380516	76.9123	0.82972	0.300778	0.00580529	0.0793196	100380516	taf6l	TATA-box binding protein associated factor 6 like
gene25723:106564867	920.682	0.772893	0.280242	0.00581648	0.0793563	106564867	LOC106564867	T-complex protein 1 subunit delta
gene49596:106588137	90.3908	-1.62124	0.587853	0.00581728	0.0793563	106588137	LOC106588137	multidrug resistance-associated protein 9-like
gene31927:106570789	75.4366	0.791392	0.286996	0.00582452	0.0793646	106570789	LOC106570789	DNA-directed RNA polymerases I, II, and III subunit RPABC4-like
gene45882:106584615	2084.25	0.520909	0.188907	0.00582477	0.0793646	106584615	LOC106584615	60S ribosomal protein L27a
gene76399:106591006	43.4589	-0.927872	0.336571	0.00583629	0.0794748	106591006	LOC106591006	probable JmjC domain-containing histone demethylation protein 2C
gene16419:106609528	246.297	0.635395	0.230536	0.00584838	0.0795289	106609528	LOC106609528	ubiquitin-conjugating enzyme E2 N-like
gene20696:106613675	471.208	0.635442	0.23056	0.00584984	0.0795289	106613675	LOC106613675	myeloid-derived growth factor-like
gene32355:106571200	235.509	0.609971	0.221322	0.0058506	0.0795289	106571200	lpgat1	lysophosphatidylglycerol acyltransferase 1
gene44469:106583271	530.07	0.616341	0.223668	0.00585834	0.0795873	106583271	LOC106583271	probable Bax inhibitor 1
gene33103:106571940	1749.17	0.821763	0.298257	0.00586525	0.0796344	106571940	LOC106571940	prostaglandin E synthase 3-like
gene26635:106565861	196.884	0.963331	0.349732	0.00587847	0.0796968	106565861	LOC106565861	guanine nucleotide-binding protein-like 3
gene32595:106571417	399.024	-0.623068	0.226206	0.00587957	0.0796968	106571417	LOC106571417	transcription factor HIVEP2-like
gene3860:106578882	31.482	1.0672	0.387482	0.00588366	0.0796968	106578882	LOC106578882	gastrula zinc finger protein XlCGF57.1-like
gene48150:106586913	161.846	-1.17367	0.426116	0.00588096	0.0796968	106586913	LOC106586913	solute carrier family 23 member 3-like
gene14488:106607710	61.526	-0.88255	0.320536	0.00589882	0.0798553	106607710	pnrc1	proline rich nuclear receptor coactivator 1
gene23797:106562946	182.886	0.944797	0.343171	0.00590272	0.0798613	106562946	gfm2	G elongation factor mitochondrial 2
gene28531:106567421	687.292	0.635965	0.231013	0.00590627	0.0798626	106567421	LOC106567421	heterogeneous nuclear ribonucleoprotein H-like
gene6200:106599031	366.058	0.782849	0.284398	0.00591138	0.0798849	106599031	LOC106599031	ubiquitin-60S ribosomal protein L40-like
gene49752:106588492	145.016	-1.11014	0.403332	0.00591542	0.0798928	106588492	LOC106588492	PR domain zinc finger protein 1-like
gene45576:106584336	184.672	0.747191	0.271523	0.00592594	0.079988	106584336	LOC106584336	39S ribosomal protein L55, mitochondrial-like
gene6450:106599314	44.8866	1.22587	0.445738	0.00595566	0.0803423	106599314	LOC106599314	protein FAM173B-like
gene21651:106561070	259.69	0.748711	0.272263	0.00596035	0.0803586	106561070	LOC106561070	proteasome subunit alpha type-1
gene50814:106589326	610.178	-0.43697	0.158936	0.00597127	0.0804589	106589326	LOC106589326	transcription factor 7-like 2
gene41475:100196078	110.897	0.888424	0.323243	0.00598733	0.0806282	100196078	ung	uracil DNA glycosylase
gene32072:106570933	482.949	0.79741	0.290224	0.00600396	0.0808051	106570933	LOC106570933	activated RNA polymerase II transcriptional coactivator p15-like
gene18027:106610942	924.513	-0.583496	0.212422	0.00601657	0.0808805	106610942	LOC106610942	uncharacterized protein KIAA1109-like
gene28781:106567718	127.102	0.633837	0.230733	0.00601333	0.0808805	106567718	LOC106567718	replication factor C subunit 2-like
gene70688:106593652	91.8769	-0.788424	0.287061	0.00602272	0.080916	106593652	LOC106593652	rho guanine nucleotide exchange factor 1-like
gene21143:106560321	5286.34	0.526156	0.191621	0.00603606	0.0809219	106560321	rpl5	ribosomal protein L5
gene30734:106569628	805.234	0.776884	0.282963	0.00604132	0.0809219	106569628	LOC106569628	tropomyosin alpha-1 chain-like
gene31457:100136469	3241.05	0.62121	0.226275	0.00604417	0.0809219	100136469	LOC100136469	anterior gradient-2-like protein 2
gene45548:106584307	114.055	0.882927	0.321508	0.00602892	0.0809219	106584307	LOC106584307	protein ECT2-like
gene49587:106588129	130.76	-0.740633	0.269709	0.00603193	0.0809219	106588129	LOC106588129	FH1/FH2 domain-containing protein 1-like
gene58066:106592516	217.927	-0.927801	0.337911	0.00603825	0.0809219	106592516	LOC106592516	uncharacterized LOC106592516
gene10077:106603497	113.915	-1.26845	0.462089	0.00605067	0.0809619	106603497	LOC106603497	protein FAM222B-like
gene28910:106567977	103.796	0.89901	0.32757	0.00606063	0.0810482	106567977	LOC106567977	mitochondrial import inner membrane translocase subunit Tim22-like
gene2261:106563511	97.2154	1.12552	0.410266	0.00608095	0.0810955	106563511	LOC106563511	protein regulator of cytokinesis 1-like
gene24018:100380290	473.478	0.857378	0.312504	0.00607733	0.0810955	100380290	c6	complement C6
gene33194:106572248	1516.89	0.41667	0.151895	0.00608523	0.0810955	106572248	LOC106572248	60S ribosomal protein L22
gene40777:106579615	231.168	0.810478	0.295369	0.00607053	0.0810955	106579615	LOC106579615	polyadenylate-binding protein 2-like
gene47083:106585835	186.904	1.02228	0.372655	0.0060836	0.0810955	106585835	smarcad1	SWI/SNF-related, matrix-associated actin-dependent regulator of chromatin, subfamily a, containing DEAD/H box 1
gene48551:106587182	3130.51	0.470901	0.171662	0.00608457	0.0810955	106587182	LOC106587182	60S ribosomal protein L13-like
gene12571:106605923	2081.49	0.559602	0.204212	0.00613834	0.081203	106605923	LOC106605923	40S ribosomal protein S27-like
gene15022:106608196	348.566	0.680334	0.248143	0.00611228	0.081203	106608196	LOC106608196	cleavage and polyadenylation specificity factor subunit 2
gene15709:106608836	236.356	0.63044	0.230016	0.00612804	0.081203	106608836	LOC106608836	mitochondrial inner membrane protein OXA1L-like
gene17707:106610762	135.094	0.670483	0.244653	0.00613374	0.081203	106610762	qrsl1	glutaminyl-tRNA synthase (glutamine-hydrolyzing)-like 1
gene19286:100196611	2301.91	0.584879	0.21337	0.0061226	0.081203	100196611	ef1g	Elongation factor 1-gamma
gene26376:106565475	274.606	2.70641	0.987783	0.00614604	0.081203	106565475	LOC106565475	uncharacterized LOC106565475
gene29150:106567766	1350.96	0.609831	0.22256	0.00614259	0.081203	106567766	aifm1	apoptosis inducing factor mitochondria associated 1
gene29562:100136497	51.9355	-1.0141	0.370022	0.00613169	0.081203	100136497	prlr	prolactin receptor
gene33155:106572274	122.815	1.03059	0.376037	0.0061315	0.081203	106572274	LOC106572274	interferon-related developmental regulator 2-like
gene39022:106577902	2255.91	-0.886989	0.32373	0.00614578	0.081203	106577902	LOC106577902	E3 ubiquitin-protein ligase TRIM21-like
gene43456:106582292	45.211	-0.887501	0.323745	0.00611863	0.081203	106582292	LOC106582292	zinc finger protein Helios-like
gene47368:106586138	327.304	-0.717571	0.261707	0.00610873	0.081203	106586138	LOC106586138	uncharacterized LOC106586138
gene48136:106586896	42.0061	-1.02668	0.374536	0.00612164	0.081203	106586896	fam160a2	family with sequence similarity 160 member A2
gene52206:106590668	5163.4	0.552003	0.201367	0.00612018	0.081203	106590668	LOC106590668	60S ribosomal protein L7-like
gene59783:106594629	29.4293	-1.07754	0.393039	0.00611473	0.081203	106594629	LOC106594629	probable JmjC domain-containing histone demethylation protein 2C
gene31461:106570323	596.476	0.568029	0.207339	0.00615109	0.0812233	106570323	LOC106570323	ATP-binding cassette sub-family F member 1-like
gene23383:106562526	203.071	-0.850917	0.310619	0.00615469	0.0812244	106562526	LOC106562526	lactadherin-like
gene17708:106610763	108.11	0.890211	0.324996	0.00616001	0.0812481	106610763	rtn4ip1	reticulon 4 interacting protein 1
gene48487:106587241	313.895	0.804721	0.293818	0.00616569	0.0812766	106587241	eif3j	eukaryotic translation initiation factor 3 subunit J
gene2996:100194754	2206.69	0.655604	0.239392	0.00616979	0.0812843	100194754	aldh7a1	aldehyde dehydrogenase 7 family member A1
gene44056:106582887	946.251	-0.776579	0.283629	0.00618127	0.0813891	106582887	LOC106582887	transcription factor MafB-like
gene46295:106585160	329.019	0.692362	0.252918	0.00619096	0.0814702	106585160	smim15	small integral membrane protein 15
gene53319:106590862	27.9986	-2.53322	0.925498	0.00619758	0.0815109	106590862	LOC106590862	cytidine deaminase-like
gene41435:106580349	304.99	-0.502675	0.183666	0.00620213	0.0815243	106580349	LOC106580349	phosphatidylinositol 4,5-bisphosphate 5-phosphatase A-like
gene18941:106611940	1240.26	0.622392	0.227454	0.00621252	0.081568	106611940	LOC106611940	heterogeneous nuclear ribonucleoprotein A/B-like
gene41844:106580678	1162.63	0.677493	0.24759	0.00621241	0.081568	106580678	LOC106580678	RNA-binding protein FUS-like
gene18468:100306724	147.189	0.982251	0.359076	0.00622865	0.0816406	100306724	pttg1	pituitary tumor-transforming 1
gene7423:100196003	32.4995	1.17185	0.428373	0.0062269	0.0816406	100196003	hop2	Homologous-pairing protein 2 homolog
gene79445:106592566	1443.03	-1.32064	0.482766	0.00622743	0.0816406	106592566	LOC106592566	major facilitator superfamily domain-containing protein 12-like
gene48838:106587604	264.218	-0.788495	0.288267	0.00623246	0.0816441	106587604	LOC106587604	solute carrier family 12 member 4-like
gene47490:106586249	541.689	0.660197	0.241435	0.00624804	0.0818018	106586249	LOC106586249	alkyldihydroxyacetonephosphate synthase, peroxisomal-like
gene57355:106592182	341.01	-0.767336	0.280655	0.00625527	0.0818501	106592182	LOC106592182	protein Tob1-like
gene44919:100286430	314.372	0.702221	0.25696	0.0062798	0.0821245	100286430	lsm3	LSM3 homolog, U6 small nuclear RNA and mRNA degradation associated
gene19434:100194846	940.911	0.575002	0.210532	0.00631075	0.0824359	100194846	if4h	Eukaryotic translation initiation factor 4H
gene30307:106569207	797.242	-0.699532	0.256114	0.00630799	0.0824359	106569207	LOC106569207	solute carrier family 12 member 7-like
gene43294:106582079	337.418	-0.538841	0.197341	0.00632379	0.0825597	106582079	LOC106582079	uncharacterized LOC106582079
gene14622:106607915	308.424	0.698192	0.255785	0.00634107	0.0826917	106607915	LOC106607915	40S ribosomal protein S17-like
gene3056:106571857	65.8366	0.858626	0.314553	0.00633979	0.0826917	106571857	lyrm7	LYR motif containing 7
gene885:100195556	4691.96	-0.466287	0.170857	0.0063505	0.0827679	100195556	crip1	cysteine-rich protein 1
gene3025:106571505	146.98	-0.932845	0.341895	0.00636316	0.0828862	106571505	map3k1	mitogen-activated protein kinase kinase kinase 1
gene12116:106605401	450.935	0.800152	0.293445	0.00639612	0.0829812	106605401	LOC106605401	valine--tRNA ligase-like
gene14835:106608023	619.45	0.468444	0.171752	0.00638265	0.0829812	106608023	acp1	acid phosphatase 1
gene18113:106611173	868.922	-0.613573	0.225065	0.00640664	0.0829812	106611173	LOC106611173	ral GTPase-activating protein subunit alpha-1-like
gene18739:106611762	149.718	-1.24544	0.456579	0.00637634	0.0829812	106611762	LOC106611762	serine protease 23-like
gene21665:106561065	141.937	1.03795	0.380812	0.00641796	0.0829812	106561065	LOC106561065	tripartite motif-containing protein 16-like
gene27231:106566197	39.1952	1.77824	0.652193	0.00639991	0.0829812	106566197	LOC106566197	glutamate receptor-interacting protein 2-like
gene32429:106571278	29.1997	1.60764	0.589732	0.00640957	0.0829812	106571278	LOC106571278	uncharacterized LOC106571278
gene34247:106573095	90.3518	1.20985	0.44376	0.00640361	0.0829812	106573095	LOC106573095	cytochrome c oxidase subunit 8B, mitochondrial-like
gene42270:100196763	245.61	0.656011	0.240592	0.00639792	0.0829812	100196763	rfa1	Replication protein A 70 kDa DNA-binding subunit
gene42717:100195773	472.342	0.656535	0.240783	0.00639781	0.0829812	100195773	nduc2	NADH dehydrogenase 1 subunit C2
gene43010:106581752	469.282	-0.928058	0.340534	0.00642435	0.0829812	106581752	LOC106581752	integral membrane protein GPR155-like
gene47190:106585942	145.333	-1.20717	0.442892	0.00641728	0.0829812	106585942	LOC106585942	uncharacterized LOC106585942
gene47838:106586611	40.5253	1.12801	0.413886	0.00642196	0.0829812	106586611	LOC106586611	centromere protein J-like
gene51104:106589561	50.6281	1.13638	0.416917	0.00641684	0.0829812	106589561	LOC106589561	uncharacterized LOC106589561
gene73258:106592206	105.295	1.08364	0.397396	0.0063942	0.0829812	106592206	LOC106592206	39S ribosomal protein L2, mitochondrial-like
gene15407:106608519	214.661	-0.584771	0.214591	0.00642914	0.0829967	106608519	paqr9	progestin and adipoQ receptor family member 9
gene36232:106575234	140.737	-0.790037	0.289939	0.00643324	0.0830032	106575234	LOC106575234	activin receptor type-2A-like
gene12032:106605475	141.048	0.674482	0.247587	0.0064452	0.0830646	106605475	LOC106605475	protein DEK-like
gene43250:100194724	1517.87	0.606441	0.222605	0.0064438	0.0830646	100194724	LOC100194724	ATP synthase subunit O, mitochondrial
gene43458:106582294	34.0134	1.15191	0.422904	0.00645355	0.0831259	106582294	LOC106582294	BRCA1-associated RING domain protein 1-like
gene19460:106612446	2570.58	-0.684735	0.251431	0.00646233	0.0831337	106612446	LOC106612446	NADPH--cytochrome P450 reductase
gene24471:106563618	51.6788	1.12817	0.414285	0.0064656	0.0831337	106563618	LOC106563618	M-phase inducer phosphatase 1-B-like
gene50878:106589375	250.412	0.745959	0.273944	0.00646855	0.0831337	106589375	noc3l	NOC3 like DNA replication regulator
gene8445:106602078	388.582	0.60852	0.223435	0.0064598	0.0831337	106602078	LOC106602078	acyl carrier protein, mitochondrial-like
gene13596:106606846	63.2269	-0.868853	0.319184	0.00648674	0.0832711	106606846	LOC106606846	tumor necrosis factor ligand superfamily member 14-like
gene31749:106570620	92.9207	1.53413	0.563655	0.00649367	0.0832711	106570620	LOC106570620	receptor-transporting protein 3-like
gene43709:106582541	326.646	-0.701497	0.257725	0.00649104	0.0832711	106582541	LOC106582541	fer-1-like protein 6
gene52184:106590645	93.5318	0.647433	0.237847	0.00648777	0.0832711	106590645	LOC106590645	calponin-3-like
gene2945:106570355	162.327	0.792905	0.291453	0.00651791	0.0834892	106570355	fpgs	folylpolyglutamate synthase
gene60241:106591283	150.155	0.974514	0.358191	0.00651523	0.0834892	106591283	LOC106591283	transcription factor A, mitochondrial-like
gene1474:106609414	615.611	0.753825	0.277113	0.00652278	0.0835054	106609414	LOC106609414	28 kDa heat- and acid-stable phosphoprotein-like
gene19824:106612879	233.742	0.681431	0.250575	0.00653861	0.0835228	106612879	LOC106612879	methylosome subunit pICln-like
gene21267:106560449	1030.86	-0.522051	0.19195	0.00653366	0.0835228	106560449	ddah1	dimethylarginine dimethylaminohydrolase 1
gene27629:106566535	82.2883	-0.706677	0.259841	0.0065351	0.0835228	106566535	LOC106566535	cyclin-dependent kinase 15-like
gene29612:100194594	202.333	0.581059	0.213654	0.00653552	0.0835228	100194594	txnl1	thioredoxin like 1
gene54947:106591922	49.6002	1.86343	0.685284	0.00654369	0.0835414	106591922	LOC106591922	probable E3 ubiquitin-protein ligase HERC6
gene36158:106575130	68.7847	0.851825	0.313342	0.00655754	0.0836258	106575130	ankrd10	ankyrin repeat domain 10
gene47906:106586659	85.8161	0.898823	0.330611	0.00655437	0.0836258	106586659	LOC106586659	alpha/beta hydrolase domain-containing protein 13-like
gene49937:106588321	179.779	0.827592	0.304488	0.00656816	0.083715	106588321	LOC106588321	interleukin enhancer-binding factor 2 homolog
gene35292:106574186	5476.21	0.748898	0.275572	0.00657545	0.0837617	106574186	ncl	nucleolin
gene43807:100196509	1826.49	0.463526	0.170584	0.00658191	0.0837978	100196509	t4s5	Transmembrane 4 L6 family member 5
gene72610:106595530	30.2608	-1.35493	0.498691	0.00658835	0.0838336	106595530	LOC106595530	hepatocyte growth factor-regulated tyrosine kinase substrate-like
gene32701:106571497	42.5628	1.1153	0.410545	0.00659517	0.0838742	106571497	LOC106571497	centromere protein W-like
gene46393:106585077	178.74	-0.579368	0.213291	0.00660119	0.0839046	106585077	LOC106585077	tankyrase-1
gene51755:106590204	129.065	-0.599954	0.220971	0.00662609	0.0841747	106590204	LOC106590204	ras-related protein Ral-A
gene18975:106612009	219.418	2.99575	1.10347	0.00663061	0.0841858	106612009	LOC106612009	pancreatic secretory trypsin inhibitor-like
gene17197:106610286	111.792	2.0546	0.756854	0.00663439	0.0841875	106610286	LOC106610286	probable E3 ubiquitin-protein ligase HERC3
gene27747:106566630	123.9	0.837193	0.308477	0.00664854	0.0843207	106566630	mrps25	mitochondrial ribosomal protein S25
gene3961:106579951	139.228	0.862067	0.317745	0.00666607	0.0844966	106579951	LOC106579951	protein TBRG4-like
gene12413:106605764	143.136	0.934532	0.34457	0.00668438	0.0845432	106605764	grwd1	glutamate rich WD repeat containing 1
gene17076:100194613	2382.64	0.738506	0.272263	0.00667837	0.0845432	100194613	hmgb2	high-mobility group box 2
gene26332:106565441	222.591	0.810504	0.298836	0.00668373	0.0845432	106565441	timeless	timeless circadian regulator
gene46484:106584999	449.057	-1.281	0.472246	0.00667658	0.0845432	106584999	LOC106584999	sodium/potassium/calcium exchanger 6, mitochondrial-like
gene3164:106572709	233.914	-0.775019	0.2859	0.00671201	0.0848461	106572709	fsd1l	fibronectin type III and SPRY domain containing 1 like
gene16199:106609290	69.0634	0.904118	0.333695	0.0067402	0.0850628	106609290	LOC106609290	centrosomal protein of 83 kDa-like
gene34297:106573125	228.406	0.852539	0.314618	0.00673324	0.0850628	106573125	nup160	nucleoporin 160
gene46493:100136541	1207.32	4.01963	1.48352	0.00673819	0.0850628	100136541	LOC100136541	ISG15-like protein
gene16306:106609455	105.196	0.71696	0.264698	0.00675684	0.085222	106609455	nup37	nucleoporin 37
gene39448:106578357	79.946	1.22208	0.451213	0.0067602	0.085222	106578357	tdrd1	tudor domain containing 1
gene45796:106584534	378.18	-0.693359	0.256046	0.00677013	0.0853007	106584534	LOC106584534	Golgi apparatus protein 1-like
gene32638:106571448	464.801	0.920816	0.340075	0.00677536	0.08532	106571448	LOC106571448	sodium-dependent multivitamin transporter-like
gene47646:100196423	131.461	-1.33928	0.494693	0.00678328	0.0853732	100196423	dirc2	disrupted in renal carcinoma 2
gene18443:106611489	96.3834	-1.12053	0.414001	0.00679786	0.085479	106611489	LOC106611489	zinc finger FYVE domain-containing protein 26-like
gene18969:106611971	1169.29	1.02647	0.379299	0.00680529	0.085479	106611971	LOC106611971	heterogeneous nuclear ribonucleoprotein A0-like
gene23839:106562985	164.339	0.993928	0.367283	0.00680649	0.085479	106562985	ddx56	DEAD-box helicase 56
gene3701:106577306	2222.84	0.549898	0.203188	0.00680266	0.085479	106577306	LOC106577306	60S ribosomal protein L18-like
gene47867:106586630	1589.84	0.547047	0.202175	0.00681372	0.0855233	106586630	LOC106586630	ATP synthase subunit O, mitochondrial-like
gene47666:106586437	742.321	0.871007	0.321939	0.00682003	0.085556	106586437	LOC106586437	basic leucine zipper and W2 domain-containing protein 1-A-like
gene65617:106594258	102.26	0.823771	0.304517	0.00682683	0.0855948	106594258	LOC106594258	transcription factor A, mitochondrial-like
gene48571:106587330	61.4167	-1.57061	0.580662	0.00683328	0.0856292	106587330	LOC106587330	PH domain leucine-rich repeat-containing protein phosphatase 2-like
gene38992:106577890	250.954	-1.14494	0.423398	0.00684733	0.0857373	106577890	LOC106577890	arrestin red cell isoform 1-like
gene8684:100196683	1158.52	1.8157	0.671467	0.00684933	0.0857373	100196683	LOC100196683	uncharacterized LOC100196683
gene19498:106612477	338.555	-0.519001	0.191965	0.00685893	0.0858109	106612477	kmt2a	lysine methyltransferase 2A
gene14494:100195667	108.796	0.652268	0.241366	0.00688405	0.0860786	100195667	lyrm2	LYR motif containing 2
gene38407:106577308	259.51	0.542984	0.200955	0.00689196	0.0861309	106577308	LOC106577308	NADH dehydrogenase [ubiquinone] 1 beta subcomplex subunit 8, mitochondrial-like
gene12047:106605461	36.8402	1.02037	0.377701	0.00690193	0.0862085	106605461	LOC106605461	protein disulfide-isomerase A3-like
gene50227:106588652	237.473	0.990058	0.366503	0.00690564	0.0862085	106588652	LOC106588652	uncharacterized LOC106588652
gene10712:106604149	752.612	-0.466329	0.172728	0.00693847	0.0862918	106604149	LOC106604149	TNFAIP3-interacting protein 1-like
gene25411:106564561	196.939	0.737426	0.273119	0.00693354	0.0862918	106564561	LOC106564561	ATPase asna1-like
gene36258:106575213	62.334	0.708987	0.262539	0.00692352	0.0862918	106575213	LOC106575213	formimidoyltransferase-cyclodeaminase-like
gene38762:106577641	1830.75	0.954625	0.353588	0.00693754	0.0862918	106577641	LOC106577641	placenta-specific gene 8 protein-like
gene6110:100195537	354.664	0.98629	0.365213	0.00692175	0.0862918	100195537	LOC100195537	nucleolin
gene70809:100195259	1196.94	0.774643	0.286913	0.00693549	0.0862918	100195259	ptbp1	Polypyrimidine tract-binding protein 1
gene7438:100195837	171.295	0.88623	0.328208	0.00692967	0.0862918	100195837	nudt1	nudix hydrolase 1
gene5187:106591659	184.609	0.603532	0.223605	0.0069526	0.086421	106591659	LOC106591659	NADH dehydrogenase [ubiquinone] 1 beta subcomplex subunit 7-like
gene24048:106563303	152.264	-0.754439	0.279631	0.00697615	0.0866672	106563303	LOC106563303	TNF receptor-associated factor 2-like
gene51701:106590151	183.19	0.604725	0.224188	0.00698831	0.0867131	106590151	LOC106590151	39S ribosomal protein L15, mitochondrial-like
gene68367:106594063	181.618	-1.85883	0.68911	0.00698744	0.0867131	106594063	LOC106594063	lysosomal Pro-X carboxypeptidase-like
gene7657:106601282	104.27	1.02982	0.381803	0.00699111	0.0867131	106601282	LOC106601282	suppressor of SWI4 1 homolog
gene12401:100196177	590.946	0.535395	0.198535	0.00700233	0.0867599	100196177	ndufa3	NADH:ubiquinone oxidoreductase subunit A3
gene28076:106566972	2798.17	0.776939	0.288123	0.00700616	0.0867599	106566972	LOC106566972	keratin, type I cytoskeletal 18-like
gene63706:106592358	102.961	0.810719	0.300638	0.00700387	0.0867599	106592358	LOC106592358	uncharacterized protein C18orf19 homolog B-like
gene11042:100195558	66.7261	1.05501	0.3913	0.00701446	0.0868162	100195558	rnh2c	Ribonuclease H2 subunit C
gene6119:106598872	32.7039	-1.24134	0.460487	0.007024	0.0868877	106598872	LOC106598872	CMRF35-like molecule 1
gene17750:106610804	157.691	-0.676978	0.251236	0.00704745	0.0871173	106610804	ralgapa2	Ral GTPase activating protein catalytic alpha subunit 2
gene41158:106580039	3061.77	-0.7664	0.284434	0.0070501	0.0871173	106580039	LOC106580039	long-chain-fatty-acid--CoA ligase ACSBG2-like
gene11907:106605270	29.2691	-1.246	0.462578	0.00706846	0.0871276	106605270	LOC106605270	DNA-binding protein SATB1-like
gene21097:106560278	70.8292	1.08595	0.403195	0.00707358	0.0871276	106560278	LOC106560278	uncharacterized LOC106560278
gene28672:106567559	54.1619	-0.893199	0.331621	0.00707203	0.0871276	106567559	LOC106567559	double C2-like domain-containing protein beta
gene32741:100194874	124.604	0.649557	0.241134	0.00706513	0.0871276	100194874	ubr7	ubiquitin protein ligase E3 component n-recognin 7 (putative)
gene32868:100194514	385.031	0.51736	0.192066	0.0070671	0.0871276	100194514	rps29	ribosomal protein S29
gene40576:106579473	340.261	0.741208	0.275166	0.00706698	0.0871276	106579473	LOC106579473	eukaryotic translation initiation factor 1A, X-chromosomal
gene11945:100286611	87.4902	-0.709683	0.263567	0.00708947	0.0872768	100286611	raa2a	Ras-related protein RABA2a
gene18436:100380299	81.6912	0.887953	0.33003	0.00713399	0.0877009	100380299	actn1	actinin alpha 1
gene32161:106571015	115.327	-0.706577	0.26264	0.00713911	0.0877009	106571015	LOC106571015	sorting nexin-17-like
gene36310:106575163	414.236	-0.472346	0.175564	0.00713562	0.0877009	106575163	LOC106575163	E3 ubiquitin-protein ligase MARCH7-like
gene54946:106591921	45.066	1.92869	0.71688	0.0071366	0.0877009	106591921	LOC106591921	probable E3 ubiquitin-protein ligase HERC6
gene19019:101448012	438.886	0.960473	0.357103	0.00715327	0.0877348	101448012	slbp	stem-loop binding protein
gene23990:106563153	600.014	0.945426	0.351472	0.00714728	0.0877348	106563153	LOC106563153	sarcoplasmic/endoplasmic reticulum calcium ATPase 2
gene30759:106569651	129.033	1.01836	0.378603	0.00714965	0.0877348	106569651	pask	PAS domain containing serine/threonine kinase
gene2288:106563758	124.978	-0.794727	0.295531	0.0071635	0.0878137	106563758	LOC106563758	interleukin-7 receptor subunit alpha-like
gene45376:106584179	382.595	-0.509813	0.189684	0.00719455	0.0881475	106584179	LOC106584179	protein SZT2-like
gene3114:106572350	39.8331	-1.17045	0.435566	0.00720575	0.0882061	106572350	LOC106572350	cingulin-like protein 1
gene47683:106586452	244.896	-0.648979	0.241514	0.00720697	0.0882061	106586452	slc12a8	solute carrier family 12 member 8
gene13703:106606931	82.8333	-0.790062	0.294037	0.00721087	0.0882071	106606931	LOC106606931	growth factor receptor-bound protein 2-like
gene48691:106587456	124.143	0.789537	0.293871	0.0072167	0.0882317	106587456	cmc2	C-X9-C motif containing 2
gene46369:106585098	129.239	0.852721	0.317444	0.00722673	0.0882609	106585098	LOC106585098	cell division cycle-associated protein 2-like
gene7441:100195759	68.1052	1.13129	0.421142	0.00722622	0.0882609	100195759	psmg3	proteasome (prosome, macropain) assembly chaperone 3
gene33868:106572698	111.911	-0.740354	0.275637	0.00723188	0.0882771	106572698	LOC106572698	probable E3 ubiquitin-protein ligase DTX3
gene39985:106578875	299.768	0.632757	0.235597	0.00723649	0.0882867	106578875	mrpl38	mitochondrial ribosomal protein L38
gene2730:100286508	90.3129	0.728283	0.271224	0.00724933	0.0883967	100286508	cetn3	centrin 3
gene26680:106565820	318.69	0.858328	0.319715	0.00726026	0.0884716	106565820	LOC106565820	dolichyl-diphosphooligosaccharide--protein glycosyltransferase subunit 1-like
gene27850:106566693	147.463	-0.710771	0.264765	0.00726314	0.0884716	106566693	LOC106566693	guanine nucleotide-binding protein G(s) subunit alpha-like
gene51288:106589736	180.308	0.92795	0.345753	0.0072779	0.0886046	106589736	msh6	mutS homolog 6
gene40531:100337625	670.889	1.02759	0.382925	0.00728481	0.0886421	100337625	irf-3	interferon regulatory factor 3
gene12014:106605367	194.528	0.536746	0.200099	0.00730942	0.0886578	106605367	LOC106605367	CD83 antigen-like
gene19839:106612862	89.0794	-0.791342	0.295006	0.00730824	0.0886578	106612862	bcas3	BCAS3, microtubule associated cell migration factor
gene30837:100286592	753.902	0.552372	0.205904	0.00730365	0.0886578	100286592	ndufb3	NADH:ubiquinone oxidoreductase subunit B3
gene3416:106574626	247.22	-0.857399	0.319671	0.00731552	0.0886578	106574626	LOC106574626	pyruvate kinase PKLR-like
gene35243:106574142	151.2	0.744265	0.277469	0.00731101	0.0886578	106574142	LOC106574142	actin-like protein 6A
gene7084:106600728	162.115	-0.962524	0.358751	0.00729681	0.0886578	106600728	LOC106600728	protein yippee-like 3
gene8817:106602394	52.8613	1.12234	0.418461	0.00731681	0.0886578	106602394	LOC106602394	dCTP pyrophosphatase 1 pseudogene
gene9555:106602990	713.751	0.739873	0.275855	0.00731604	0.0886578	106602990	LOC106602990	cytochrome c oxidase subunit 8B, mitochondrial-like
gene33030:106571862	82.4412	0.894532	0.333574	0.00732574	0.0886729	106571862	eif2d	eukaryotic translation initiation factor 2D
gene37107:106576017	164.319	0.737001	0.274817	0.00732298	0.0886729	106576017	LOC106576017	ATP-dependent DNA helicase Q1-like
gene18456:106611504	1951.51	0.496297	0.18512	0.00734151	0.0887708	106611504	LOC106611504	60S ribosomal protein L36a-like
gene46967:106585673	609.829	-0.485049	0.180917	0.00733902	0.0887708	106585673	LOC106585673	ankyrin repeat domain-containing protein 13A-like
gene11428:100380596	257.829	0.71087	0.26522	0.00735546	0.0888	100380596	prp19	PRP19/PSO4 homolog (S. cerevisiae)
gene4029:106580504	176.139	0.668572	0.249409	0.00734846	0.0888	106580504	LOC106580504	protein DEK-like
gene45142:106583922	535.516	0.731043	0.272745	0.00735524	0.0888	106583922	LOC106583922	protein arginine N-methyltransferase 1-like
gene1103:106605019	86.813	0.845141	0.315357	0.00736338	0.0888491	106605019	LOC106605019	cysteine sulfinic acid decarboxylase-like
gene18239:106611300	459.843	-0.511055	0.190734	0.00737514	0.0888777	106611300	LOC106611300	uncharacterized LOC106611300
gene20645:106613633	1066.84	-0.566602	0.21149	0.00738213	0.0888777	106613633	LOC106613633	cAMP-specific 3',5'-cyclic phosphodiesterase 4D-like
gene34521:106573382	219.344	-0.78622	0.293456	0.0073804	0.0888777	106573382	LOC106573382	ubiquitin-conjugating enzyme E2 H-like
gene43460:106582297	37.4944	1.08335	0.404392	0.00738499	0.0888777	106582297	LOC106582297	BRCA1-associated RING domain protein 1-like
gene59101:106594422	144.951	1.02755	0.38347	0.00737056	0.0888777	106594422	LOC106594422	nucleolar protein 58-like
gene21070:106560260	466.976	0.51907	0.193785	0.00739334	0.0889319	106560260	LOC106560260	OCIA domain-containing protein 1-like
gene5762:106597138	72.3138	1.01248	0.378074	0.00740655	0.0890444	106597138	lyrm4	LYR motif containing 4
gene14214:106607495	32.9287	1.24703	0.465809	0.00742547	0.0892254	106607495	LOC106607495	uncharacterized LOC106607495
gene43646:100194625	2852.19	0.663682	0.247927	0.00743021	0.0892359	100194625	atp5g2	ATP synthase, H+ transporting, mitochondrial F0 complex, subunit c-2
gene47075:106585827	923.196	0.904204	0.337916	0.00745445	0.0894806	106585827	me2	malic enzyme 2
gene49279:106588057	132.619	0.851474	0.318237	0.00745961	0.0894959	106588057	mrpl46	mitochondrial ribosomal protein L46
gene3364:106574167	64.0779	-0.864897	0.323358	0.00747879	0.0896795	106574167	LOC106574167	BCL2/adenovirus E1B 19 kDa protein-interacting protein 2-like
gene19798:106612898	2770.04	0.516996	0.193334	0.00749274	0.089707	106612898	LOC106612898	40S ribosomal protein S3
gene23486:100195529	69.6013	0.880377	0.329199	0.00748861	0.089707	100195529	prc1	regulator of cytokinesis 1
gene47757:106586515	274.205	-0.580375	0.217021	0.00748899	0.089707	106586515	akap11	A-kinase anchoring protein 11
gene11765:106605120	267.31	0.591988	0.221437	0.00750891	0.0897289	106605120	LOC106605120	28S ribosomal protein S15, mitochondrial-like
gene13679:106606913	574.443	0.430404	0.160993	0.00750788	0.0897289	106606913	LOC106606913	eukaryotic translation initiation factor 3 subunit D
gene24731:106563878	65.8857	-1.80773	0.676221	0.00751132	0.0897289	106563878	LOC106563878	tripartite motif-containing protein 3-like
gene29400:106568330	1570.98	-0.577323	0.215926	0.00750162	0.0897289	106568330	LOC106568330	vesicle-associated membrane protein 8-like
gene48545:106587188	112.618	-1.17407	0.439206	0.007514	0.0897289	106587188	LOC106587188	polycystic kidney disease protein 1-like 2
gene14951:106608110	3312.27	0.554331	0.207423	0.00752944	0.0898668	106608110	LOC106608110	40S ribosomal protein S7
gene24573:106563745	553.736	0.627799	0.235002	0.00755211	0.0900684	106563745	LOC106563745	NADH dehydrogenase [ubiquinone] 1 alpha subcomplex subunit 2-like
gene46119:106584850	127.709	0.958537	0.358841	0.00755802	0.0900684	106584850	LOC106584850	dnaJ homolog subfamily A member 4-like
gene4799:106586738	33.598	1.40821	0.527151	0.00755449	0.0900684	106586738	LOC106586738	collagen alpha-1(XVII) chain-like
gene12526:100380869	179.011	0.80026	0.299637	0.00756779	0.0901097	100380869	LOC100380869	ATPase family AAA domain-containing protein 2
gene16036:106609124	165.457	0.718466	0.269066	0.00758001	0.0901097	106609124	LOC106609124	lamina-associated polypeptide 2, isoforms beta/delta/epsilon/gamma-like
gene17073:106610168	217.542	-0.473507	0.177324	0.00757853	0.0901097	106610168	LOC106610168	F-box only protein 8-like
gene3931:106579564	104.003	1.01799	0.381295	0.0075888	0.0901097	106579564	LOC106579564	DDB1- and CUL4-associated factor 13-like
gene39423:106578327	2618.89	0.646706	0.242216	0.00758628	0.0901097	106578327	LOC106578327	eukaryotic translation initiation factor 3 subunit C
gene40236:106579274	83.3902	1.18645	0.444307	0.00757734	0.0901097	106579274	LOC106579274	twinkle protein, mitochondrial-like
gene59211:106594111	2629.94	0.507739	0.190154	0.00758198	0.0901097	106594111	LOC106594111	60S ribosomal protein L18a-like
gene11489:106604875	596.913	-0.527302	0.197535	0.00759835	0.0901767	106604875	diaph1	diaphanous related formin 1
gene499:106589171	210.749	-1.07269	0.401926	0.00761039	0.0902733	106589171	LOC106589171	RAS guanyl-releasing protein 1-like
gene50860:100195246	165.237	-0.602019	0.225618	0.0076233	0.09038	100195246	pkha1	Pleckstrin homology domain-containing family A member 1
gene16487:106609600	110.429	-0.854914	0.320463	0.00763619	0.0903935	106609600	LOC106609600	plasma membrane calcium-transporting ATPase 1-like
gene28675:106567563	381.099	-0.458566	0.171887	0.00763431	0.0903935	106567563	LOC106567563	GATS-like protein 2
gene32149:106571007	2508.45	0.512174	0.191985	0.00763531	0.0903935	106571007	LOC106571007	40S ribosomal protein S12
gene44088:106582918	684.228	0.756212	0.283498	0.0076433	0.0904314	106582918	LOC106582918	cytochrome b-c1 complex subunit 1, mitochondrial-like
gene32193:106571044	355.421	-0.722416	0.2709	0.00765928	0.0904876	106571044	LOC106571044	kinesin-like protein KIF13B
gene37592:106576497	286.848	0.734891	0.275544	0.007652	0.0904876	106576497	LOC106576497	inosine-5'-monophosphate dehydrogenase 2-like
gene42755:106581600	128.353	-0.598397	0.224395	0.00765981	0.0904876	106581600	LOC106581600	glioma tumor suppressor candidate region gene 1 protein-like
gene20739:100195139	1276.59	0.582715	0.218541	0.00766726	0.0905293	100195139	hnrpm	Heterogeneous nuclear ribonucleoprotein M
gene16355:100195596	2253.75	0.593866	0.22277	0.00767982	0.0906178	100195596	rs16	40S ribosomal protein S16
gene2196:106562742	362.158	0.646228	0.242469	0.00769437	0.0906178	106562742	LOC106562742	ubiquitin-conjugating enzyme E2 L3-like
gene27495:100196079	496.594	0.89031	0.334041	0.00769258	0.0906178	100196079	ruxg	Small nuclear ribonucleoprotein G
gene38591:106577489	137.678	-0.652859	0.244926	0.00768669	0.0906178	106577489	LOC106577489	TBC1 domain family member 14-like
gene725:106601609	27.5921	-1.35628	0.508868	0.00769209	0.0906178	106601609	LOC106601609	phospholipase DDHD1-like
gene51237:106589680	172.731	-0.610304	0.229102	0.00772412	0.0909217	106589680	tnfaip3	TNF alpha induced protein 3
gene13182:106606534	102.176	-0.710223	0.266698	0.00774408	0.0909736	106606534	LOC106606534	interleukin-6 receptor subunit beta-like
gene19958:106613038	249.412	0.652198	0.244941	0.00775216	0.0909736	106613038	LOC106613038	pre-rRNA-processing protein TSR1 homolog
gene3268:106573505	262.117	-0.577489	0.21688	0.00775149	0.0909736	106573505	ano10	anoctamin 10
gene33914:106572754	202.594	0.92812	0.348485	0.00773791	0.0909736	106572754	LOC106572754	serine--tRNA ligase, cytoplasmic-like
gene40890:106579775	222.092	-0.539297	0.202537	0.00775134	0.0909736	106579775	nktr	natural killer cell triggering receptor
gene50547:100380787	282.879	0.86287	0.324059	0.00775176	0.0909736	100380787	bop1	block of proliferation 1
gene43876:106582712	843.157	0.630525	0.236838	0.00776178	0.0910403	106582712	LOC106582712	cysteine and glycine-rich protein 1-like
gene1061:106604674	127.036	-0.604759	0.227343	0.00781134	0.0911727	106604674	rab11fip2	RAB11 family interacting protein 2
gene13139:106606479	699.608	0.905741	0.340478	0.00780924	0.0911727	106606479	trap1	TNF receptor associated protein 1
gene26982:106566011	79.8286	-0.962792	0.361913	0.00780742	0.0911727	106566011	LOC106566011	SAM pointed domain-containing Ets transcription factor-like
gene28301:106567170	1451.85	-0.589576	0.221536	0.00778368	0.0911727	106567170	LOC106567170	DAZ-associated protein 2-like
gene2911:106569988	465.949	-1.46433	0.550181	0.00777817	0.0911727	106569988	LOC106569988	protein FAM102A-like
gene29977:106568958	1520.05	0.653992	0.245902	0.00782428	0.0911727	106568958	LOC106568958	40S ribosomal protein S28
gene30002:106568936	161.973	-1.45705	0.547853	0.00782439	0.0911727	106568936	LOC106568936	GTPase IMAP family member 7-like
gene31164:106569978	88.4834	-0.837262	0.314773	0.0078166	0.0911727	106569978	LOC106569978	glycogen synthase kinase-3 beta-like
gene43217:106582135	263.344	-0.719197	0.270396	0.00781895	0.0911727	106582135	LOC106582135	ras-related protein Rab-20-like
gene4321:100195788	261.355	0.446646	0.167926	0.00781916	0.0911727	100195788	csn7a	COP9 signalosome complex subunit 7a
gene44073:106582905	111.906	-0.616438	0.231767	0.00782015	0.0911727	106582905	LOC106582905	nuclear receptor coactivator 3-like
gene46767:100194561	2544.48	0.435582	0.163772	0.00782154	0.0911727	100194561	rpl35	ribosomal protein L35
gene50615:106589044	542.818	-0.470553	0.176835	0.00779148	0.0911727	106589044	LOC106589044	phosphatidylinositide phosphatase SAC1-B-like
gene1026:106604352	496.17	-0.468178	0.176062	0.0078334	0.0912316	106604352	mgea5	meningioma expressed antigen 5 (hyaluronidase)
gene45321:106584001	100.62	0.765258	0.2878	0.00783747	0.091233	106584001	psmg4	proteasome assembly chaperone 4
gene16884:106609968	87.9561	-0.960882	0.361575	0.00787241	0.0913257	106609968	LOC106609968	SLAM family member 5-like
gene22554:106561721	101.497	0.944397	0.355436	0.00788374	0.0913257	106561721	LOC106561721	cytochrome c oxidase subunit 5A, mitochondrial-like
gene28517:106567409	303.972	-0.667455	0.251164	0.00787343	0.0913257	106567409	p2rx1	purinergic receptor P2X 1
gene28570:106567447	214.76	-0.613805	0.230939	0.00786366	0.0913257	106567447	LOC106567447	CREB3 regulatory factor-like
gene33040:106571869	178.385	-1.15418	0.434401	0.00788498	0.0913257	106571869	LOC106571869	proline-rich transmembrane protein 3-like
gene35008:106573870	211.414	-0.783582	0.294813	0.00786305	0.0913257	106573870	jak3	Janus kinase 3
gene44057:106582888	106.312	1.11039	0.417906	0.00788335	0.0913257	106582888	LOC106582888	protein FAM83D-like
gene48474:106587250	113.322	1.08908	0.409848	0.00787758	0.0913257	106587250	dhodh	dihydroorotate dehydrogenase (quinone)
gene50385:106588811	140.895	-0.721877	0.271604	0.00786449	0.0913257	106588811	LOC106588811	ataxin-1-like
gene51739:106590189	55.5891	-1.01374	0.381484	0.00787554	0.0913257	106590189	LOC106590189	C-C chemokine receptor type 9-like
gene8411:106602047	987.941	0.683746	0.257399	0.00789866	0.0914384	106602047	LOC106602047	ATP synthase subunit d, mitochondrial-like
gene42887:106581851	264.747	1.11005	0.417962	0.00791035	0.0915279	106581851	lss	lanosterol synthase
gene12219:106605563	57.2277	-1.00333	0.377843	0.00792107	0.0915889	106605563	LOC106605563	hemicentin-2-like
gene26486:106565679	322.992	-0.770833	0.290299	0.00792356	0.0915889	106565679	LOC106565679	integrin beta-7-like
[truncated: 79,599 more rows]
