# Supplementary material for: Mid and hindgut transcriptome profiling analysis of Atlantic salmon (Salmon salar) under unpredictable chronic stress
Source: R Soc Open Sci. 2020 Feb 26;7(2):191480. doi: 10.1098/rsos.191480 (PMC7062075; doi:10.1098/rsos.191480)
Supplement: Supplementary table 5 [file rsos191480supp6.xlsx]

## Sheet: Sheet1
Significantly enriched KEGG pathways for genes differentially expressed in both midgut and hindgut.. Genes have been annotated with Entrez gene ID, Gene symbol and gene description. DE data (log fold change and adjusted p value) in both midgut and hindgut has been included for each gene. A condensed version of this table (showing only gene symbols) can be seen in Table 5 in the body of this artic…
KEGG Pathway	Gene count	p.value	p.adjust	qvalue	Entrez ID	Gene Symbol	Gene description	Hindgut Log fold change	Hindgut Adjusted p value	Midgut Log fold change	Midgut Adjusted p value
Cellular senescence	9	7.3e-07	2.9e-05	2.4e-05	106607826	LOC106607826	cyclin-dependent kinase 1-like	1.10679	0.00101865	1.30149	0.000895024
					106608573	LOC106608573	voltage-dependent anion-selective channel protein 2-like	0.390131	0.0371128	0.828195	0.0488059
					106611545	LOC106611545	cyclin-A2-like	1.04909	0.0379578	1.39232	0.0251226
					106563318	ccnb1	cyclin B1	1.06339	0.0203236	1.53599	0.0099126
					106566708	LOC106566708	G2/mitotic-specific cyclin-B1-like	1.08618	0.0219263	1.37136	0.0296652
					100196122	cdc2	Cell division control protein 2 homolog	0.867238	0.034903	1.04751	0.0192391
					106582436	LOC106582436	major histocompatibility complex class I-related gene protein-like	-0.856097	0.00406255	-0.783174	0.0337483
					106583670	LOC106583670	nuclear factor of activated T-cells, cytoplasmic 2-like	-1.20032	0.0110046	-1.33002	0.0200727
					106587338	ccnb2	cyclin B2	0.974964	0.0461034	1.20856	0.0100276
p53 signaling pathway	6	3.8e-06	7.6e-05	6.2e-05	106607826	LOC106607826	cyclin-dependent kinase 1-like	1.10679	0.00101865	1.30149	0.000895024
					106607664	rrm2	ribonucleotide reductase regulatory subunit M2	0.995824	0.0466069	1.64324	0.0120881
					106563318	ccnb1	cyclin B1	1.06339	0.0203236	1.53599	0.0099126
					106566708	LOC106566708	G2/mitotic-specific cyclin-B1-like	1.08618	0.0219263	1.37136	0.0296652
					100196122	cdc2	Cell division control protein 2 homolog	0.867238	0.034903	1.04751	0.0192391
					106587338	ccnb2	cyclin B2	0.974964	0.0461034	1.20856	0.0100276
Cell cycle	7	8.7e-06	0.00012	9.5e-05	106607826	LOC106607826	cyclin-dependent kinase 1-like	1.10679	0.00101865	1.30149	0.000895024
					106611545	LOC106611545	cyclin-A2-like	1.04909	0.0379578	1.39232	0.0251226
					106563318	ccnb1	cyclin B1	1.06339	0.0203236	1.53599	0.0099126
					106566708	LOC106566708	G2/mitotic-specific cyclin-B1-like	1.08618	0.0219263	1.37136	0.0296652
					100196122	cdc2	Cell division control protein 2 homolog	0.867238	0.034903	1.04751	0.0192391
					106587338	ccnb2	cyclin B2	0.974964	0.0461034	1.20856	0.0100276
					100194750	cdc20	cell division cycle 20	1.04974	0.0369671	1.47419	0.0109362
Progesterone-mediated oocyte maturation	6	1.6e-05	0.00016	0.00013	106607826	LOC106607826	cyclin-dependent kinase 1-like	1.10679	0.00101865	1.30149	0.000895024
					106611545	LOC106611545	cyclin-A2-like	1.04909	0.0379578	1.39232	0.0251226
					106563318	ccnb1	cyclin B1	1.06339	0.0203236	1.53599	0.0099126
					106566708	LOC106566708	G2/mitotic-specific cyclin-B1-like	1.08618	0.0219263	1.37136	0.0296652
					100196122	cdc2	Cell division control protein 2 homolog	0.867238	0.034903	1.04751	0.0192391
					106587338	ccnb2	cyclin B2	0.974964	0.0461034	1.20856	0.0100276
Oocyte meiosis	6	4.9e-05	0.00039	0.00032	106607826	LOC106607826	cyclin-dependent kinase 1-like	1.10679	0.00101865	1.30149	0.000895024
					106563318	ccnb1	cyclin B1	1.06339	0.0203236	1.53599	0.0099126
					106566708	LOC106566708	G2/mitotic-specific cyclin-B1-like	1.08618	0.0219263	1.37136	0.0296652
					100196122	cdc2	Cell division control protein 2 homolog	0.867238	0.034903	1.04751	0.0192391
					106587338	ccnb2	cyclin B2	0.974964	0.0461034	1.20856	0.0100276
					100194750	cdc20	cell division cycle 20	1.04974	0.0369671	1.47419	0.0109362
